# Supplementary material for: Cross-species comparison of single-cell landscapes reveals conservation and innovation in chicken immune systems
Source: Research Square preprint supplement (doi:10.21203/rs.3.rs-6164369/v1), 2025-03-20
Supplement: Supplementary file 1 [file 141b51f819b31369a283eb90.xlsx]

## Sheet: Sheet1
Supplementary Table 7: Genes differentially expressed along the trajectories from haematopoietic stem cells/multipotent blood progenitors(HSC/MPP) to FDC.
	pval	qval	num_cells_expressed
FRMD8	9.34E-177	1.04E-174	2302
TRA2A	1.49E-10	8.26E-10	1355
ACSF2	1.04E-68	3.04E-67	811
PDZRN4	1.35E-21	1.32E-20	267
PRKAR2B	8.23E-07	3.28E-06	100
TSC22D1	1.83E-24	1.98E-23	1393
FARP1	4.29E-39	7.10E-38	300
PPP3CA	3.85E-16	2.96E-15	1263
ELF2	0.000415451	0.00115597	666
THRAP3	1.10E-12	7.05E-12	1676
DIAPH2	5.78E-48	1.16E-46	1691
ICE1	0.00105211	0.00274196	417
SLC38A2	3.79E-05	0.000122906	1692
RBMXL1	2.11E-19	1.89E-18	1675
DMXL1	3.72E-27	4.34E-26	947
RSF1	1.41E-10	7.79E-10	973
DOCK1	1.29E-33	1.84E-32	659
SRGAP2	6.35E-60	1.59E-58	647
GPHN	0.000305882	0.000867208	222
THBD	0.00186023	0.00461926	143
RNF220	3.09E-13	2.04E-12	1045
NBEA	0.000179069	0.000530201	68
ATP10D	3.43E-37	5.43E-36	220
LOC422426	4.04E-08	1.84E-07	572
ZCCHC6	3.11E-11	1.80E-10	519
PLIN4	2.37E-07	1.00E-06	468
SYNE1	5.24E-126	3.50E-124	1265
DLG5	3.72E-05	0.00012078	70
FBXO39	4.91E-11	2.80E-10	249
ZNF451	5.32E-09	2.62E-08	431
SLC24A3	6.84E-10	3.61E-09	200
GART	1.32E-05	4.57E-05	695
SPIN1L	0.000647285	0.00174227	76
RPS23	5.22E-94	2.24E-92	2329
PPP2R2D	3.13E-05	0.00010279	1098
JADE1	1.15E-11	6.85E-11	328
ITPR1	2.28E-130	1.57E-128	871
MAN1A1	9.13E-14	6.18E-13	546
ATP11B	0.000450151	0.00124497	508
HAT1	0.000253552	0.00073113	832
ATAD2B	6.86E-22	6.79E-21	779
SESTD1	0.00357758	0.00839476	239
SAT1	1.52E-06	5.90E-06	1771
ATL2	4.02E-06	1.49E-05	1056
MRPS2	4.78E-21	4.58E-20	1379
MTR	4.10E-07	1.70E-06	624
OTUD7A	2.29E-80	7.74E-79	325
MYH9	4.26E-81	1.46E-79	2099
RASA2	2.77E-12	1.72E-11	918
PDK4	3.02E-43	5.44E-42	449
METTL14	2.39E-08	1.11E-07	567
LPCAT2	6.72E-29	8.39E-28	720
G0S2	7.23E-10	3.80E-09	72
TMSB15B	9.60E-11	5.37E-10	1702
DAPK1	8.81E-11	4.94E-10	693
CANX	0.000163666	0.000487843	1620
OAZ1	4.98E-33	7.01E-32	2169
C12orf57	9.85E-07	3.90E-06	1801
FAM114A2	1.37E-09	7.04E-09	476
LSAMP	3.13E-09	1.57E-08	342
MGMT	6.36E-09	3.10E-08	587
GNMT	0.00240823	0.00585431	97
PTPRM	2.50E-15	1.85E-14	244
MANF	4.48E-46	8.64E-45	1502
CASK	1.71E-47	3.41E-46	1010
NDST4	4.65E-09	2.30E-08	111
ARPC1B	1.22E-113	7.01E-112	1863
GNAI1	6.17E-14	4.22E-13	741
AGAP1	0	0	727
SLC25A3	1.90E-23	1.99E-22	1889
QKI	1.59E-34	2.34E-33	1415
GOPC	0.000294801	0.000838219	401
MTM1	0.000167829	0.000499137	427
ATP6V1G3	1.16E-06	4.54E-06	87
EXOC4	0.00329522	0.00780382	599
SH3GL1	4.70E-68	1.36E-66	589
URI1	5.10E-09	2.51E-08	1130
PRKRIP1	2.26E-13	1.51E-12	926
HOXB3	0.000558997	0.00152476	70
OSBPL6	1.30E-33	1.86E-32	513
GIGYF2	6.43E-11	3.64E-10	1106
RBM26	1.17E-12	7.48E-12	1362
DNAAF9	1.15E-56	2.73E-55	453
MLLT10	8.53E-06	3.02E-05	894
RIN2	0.0042393	0.00981328	903
STK24	5.40E-08	2.43E-07	480
MEF2C	2.02E-30	2.66E-29	1197
PLOD2	2.31E-59	5.72E-58	1406
PIEZO2	1.32E-10	7.34E-10	115
NFATC3	2.02E-14	1.42E-13	934
FTH1	1.36E-49	2.85E-48	2395
TNS1	8.45E-26	9.47E-25	693
ARL15	0.00109065	0.00283134	267
RPS27A	3.35E-120	2.12E-118	2241
NOP58	3.44E-39	5.72E-38	1759
BRD3	4.15E-97	1.88E-95	829
PLCB1	4.76E-102	2.43E-100	659
HSP90AA1	4.02E-67	1.14E-65	2257
LOC101751087	7.28E-18	6.10E-17	62
PRMT5	6.44E-06	2.31E-05	891
SLIRP	2.85E-09	1.43E-08	1481
IP6K2	0.00108089	0.00280897	1055
HPGDS	1.85E-09	9.43E-09	40
UBAP2L2	1.12E-08	5.35E-08	122
CLSTN3	2.41E-10	1.31E-09	212
MTBP	3.55E-23	3.69E-22	312
SYNE2	5.28E-09	2.60E-08	133
APOA1	0.00165993	0.00417199	207
ROMO1	7.27E-08	3.23E-07	1889
WAPL	1.14E-28	1.41E-27	1384
ANKRD12	7.54E-57	1.80E-55	655
ACOX1	1.23E-06	4.83E-06	739
GPC5	1.72E-07	7.38E-07	556
REV1	1.73E-05	5.89E-05	912
ARFGEF2	0.0019461	0.00480891	525
HS1BP3	9.88E-07	3.91E-06	195
NUS1	9.66E-10	5.03E-09	954
UBE2H	1.13E-15	8.47E-15	1346
CDC40	1.03E-05	3.62E-05	764
ATP6V0A1	0.000700116	0.00187588	659
SELENOI	0.00290694	0.00695837	288
RFTN1	1.57E-214	2.51E-212	852
RPL8	2.90E-87	1.11E-85	2307
FOXK1	0.00355578	0.00835085	403
ETV3	2.80E-06	1.06E-05	1095
HYPK	0.000579918	0.00157626	1647
LAMTOR3	3.35E-64	8.88E-63	1181
PDXK	8.40E-44	1.54E-42	685
TAX1BP1	2.43E-34	3.55E-33	1125
RBM3	0.00221872	0.00542145	1943
TSC1	0.00097306	0.00254905	276
COL25A1	3.61E-14	2.50E-13	78
CLASP1	0.000166026	0.000494275	673
PIGA	7.32E-06	2.61E-05	198
PTBP2	4.73E-52	1.03E-50	712
FYB1	0	0	1463
TLK1	5.91E-09	2.89E-08	877
PIGK	0.00148735	0.003764	740
XKR4	0.00421979	0.00976967	43
SKAP2	7.51E-93	3.12E-91	1522
UBE2Q1	8.28E-08	3.66E-07	1211
2024-03-07	0.00377215	0.00881993	638
FBXL17	1.54E-05	5.29E-05	514
TENM3	2.81E-31	3.79E-30	337
RBBP6	1.61E-08	7.60E-08	1504
RPL15	3.66E-121	2.34E-119	2287
TSC22D4	7.54E-33	1.06E-31	1746
UQCRB	0.000141985	0.000427995	1493
PPFIBP1	0.000155272	0.000464803	875
DPYSL2	2.88E-38	4.65E-37	1339
NUB1	6.45E-59	1.59E-57	727
ZMIZ1	1.11E-16	8.74E-16	1143
MAP9	0.00135537	0.00345442	293
BMPR2	2.44E-09	1.23E-08	267
ST3GAL6	0.000121856	0.000369902	574
OGT	0.00017721	0.000525226	1542
ANKRD44	9.87E-28	1.18E-26	1384
RPL9	2.11E-92	8.65E-91	2235
LOC101749016	1.39E-08	6.58E-08	417
DPF3	1.92E-55	4.43E-54	516
DCUN1D4	2.40E-05	8.02E-05	184
C1S	8.01E-05	0.000250115	132
JAK2	5.13E-10	2.73E-09	898
GPC6	6.52E-05	0.000206329	84
CTDSPL	2.26E-21	2.20E-20	1384
CBLB	8.02E-06	2.85E-05	818
SCAPER	6.79E-06	2.43E-05	367
FBXL2	0.00205249	0.00504802	118
WDR26	5.89E-05	0.000187499	786
PPIP5K2	5.30E-27	6.15E-26	935
LOC112530942	1.92E-55	4.43E-54	1808
PRXL2A	8.16E-13	5.25E-12	162
TCF7L2	2.16E-06	8.23E-06	252
TMTC1	0.00220963	0.00540374	49
ZEB2	2.78E-08	1.29E-07	1327
ZNHIT6	0.000979767	0.00256617	756
PRPF4B	4.23E-07	1.75E-06	1066
MYH1G	0.000344233	0.000969384	808
FOXN3	3.14E-09	1.57E-08	909
TUBGCP5	0.000608648	0.00164642	549
CENPV	3.91E-07	1.62E-06	171
RBMS3	6.14E-21	5.85E-20	209
IGHMBP2	0.00148493	0.0037592	221
SLU7	2.77E-06	1.04E-05	594
SEMA3D	0	0	791
PNRC1	1.83E-21	1.79E-20	2070
WWOX	4.18E-07	1.73E-06	780
C6orf62	6.32E-21	6.02E-20	1259
BRWD1	0.0028556	0.00684551	1147
CAMK1D	2.22E-253	4.47E-251	961
DMD	5.79E-15	4.21E-14	128
PDLIM5	1.30E-09	6.70E-09	652
ATRX	0.000163827	0.000488224	1786
B2M	3.04E-24	3.26E-23	2156
PDIA6	3.33E-10	1.80E-09	1286
LOC101747587	1.97E-39	3.30E-38	2368
ZBTB10	6.59E-15	4.77E-14	523
SOX5	0.000200042	0.000588739	76
RAPH1	6.76E-20	6.21E-19	202
EPN2	9.41E-39	1.55E-37	1061
AFF4	6.98E-05	0.000219619	907
CCDC12	1.49E-18	1.29E-17	1157
TTC3	1.01E-11	6.06E-11	798
FOS	3.82E-33	5.39E-32	2086
WSB1	1.18E-120	7.50E-119	1215
COL1A1	9.39E-05	0.000290259	300
RCHY1	5.93E-06	2.14E-05	1180
CLASP2	1.57E-07	6.79E-07	1031
LOC101750820	0.00171623	0.00429585	74
NDUFS5	1.26E-27	1.50E-26	1742
RPS16	4.19E-100	2.04E-98	2262
BAZ1B	1.42E-07	6.16E-07	1324
PFKP	5.64E-15	4.10E-14	1256
RNF19A	2.75E-09	1.38E-08	654
PCNX1	0.000288481	0.000822001	907
WASF2	9.34E-06	3.29E-05	920
GFI1	2.15E-12	1.35E-11	339
POSTN	2.03E-17	1.67E-16	99
JTB	1.80E-12	1.13E-11	1540
LOC107057310	2.78E-07	1.17E-06	878
DUSP16	5.87E-34	8.46E-33	254
PFKFB3	5.85E-05	0.000186322	655
PRRC2C	0.00250217	0.00606259	1637
MYO1C	4.42E-06	1.63E-05	568
LRBA	7.35E-52	1.59E-50	858
ELK3	1.38E-10	7.63E-10	708
BEND5	9.81E-10	5.11E-09	579
NARF	1.93E-05	6.54E-05	518
KMT2E	4.37E-11	2.51E-10	1425
ARHGEF3	1.59E-26	1.82E-25	702
ITK	4.77E-09	2.36E-08	135
STAG1	0.000145109	0.000436783	739
GRB10	9.53E-06	3.35E-05	417
FBXO34	1.73E-05	5.91E-05	438
LUC7L	1.84E-39	3.09E-38	1020
LOC121106732	1.08E-39	1.81E-38	190
NRG4	0.00391675	0.00913142	252
NRP1	5.79E-09	2.83E-08	367
MYL12B	1.54E-10	8.48E-10	1247
PACSIN2	3.38E-10	1.82E-09	963
TF	2.25E-65	6.16E-64	792
SYNGAP1	7.94E-07	3.17E-06	611
RPS6KA5	0.0041547	0.00963416	1039
ANKFN1L	0.000245399	0.00070901	73
CCNL1	6.85E-05	0.000215949	1625
COMMD2	3.64E-35	5.45E-34	1413
CLOCK	4.52E-05	0.000145824	353
TEAD1	0.00127928	0.00327811	62
CALD1	0.000292117	0.000831297	114
SWT1	1.26E-09	6.50E-09	469
SOX6	0.00111966	0.00290099	101
CNPPD1	0.000107219	0.000328047	815
TCF12	8.01E-83	2.86E-81	1500
MAP6	0.00319003	0.00758407	27
SASH1	2.61E-35	3.93E-34	452
PDE7B	7.73E-11	4.34E-10	508
VEGFC	6.01E-67	1.69E-65	504
RPL27	3.09E-95	1.36E-93	2293
ERCC5	2.67E-17	2.17E-16	446
COMMD1	0.000217805	0.000637439	1576
NAMPTP1	3.94E-22	3.94E-21	893
IFT80	0.000148707	0.000446425	342
EEF1A1	1.03E-97	4.77E-96	2405
SON	5.06E-13	3.29E-12	1798
POLR3A	0.00165334	0.00415613	619
ZBTB20	0.000198083	0.00058344	93
HNRNPKL	4.23E-19	3.74E-18	309
FZD2	8.50E-05	0.000264167	58
PECAM1	0.000152164	0.000455963	643
DGKB	7.41E-06	2.64E-05	84
G3BP2	2.22E-12	1.39E-11	1341
DSCC1	0.00222843	0.00544337	242
SLC37A2	7.38E-59	1.81E-57	464
MOCOS	9.71E-06	3.41E-05	71
STK11	0.00393506	0.0091712	189
WWP1	5.34E-09	2.62E-08	468
SLC6A6	2.58E-12	1.60E-11	1382
IMMP2L	1.58E-10	8.74E-10	343
SIK1	9.44E-107	5.02E-105	1085
UBASH3B	4.35E-93	1.83E-91	640
PSMA7	8.06E-07	3.22E-06	1869
LPP	1.38E-05	4.74E-05	451
RETSAT	2.17E-14	1.52E-13	577
UBE2E2	1.63E-05	5.56E-05	393
SERAC1	3.54E-07	1.48E-06	216
RAB14	1.85E-26	2.11E-25	1355
MAP4K3	1.25E-06	4.88E-06	604
HOXA3	2.32E-94	1.01E-92	614
CHD2	1.09E-24	1.19E-23	1310
PPHLN1	0.000815447	0.00216435	395
DOCK7	8.30E-36	1.26E-34	392
MORF4L2	2.57E-17	2.10E-16	1306
TOP1	2.75E-12	1.70E-11	1284
CEP290	7.05E-16	5.35E-15	538
NOVA1	0.00103894	0.00271002	61
CFLAR	1.62E-48	3.31E-47	619
LOC107054724	2.92E-199	4.04E-197	492
SMAP1	3.74E-07	1.55E-06	666
CNST	2.23E-12	1.39E-11	545
ETV6	1.37E-08	6.51E-08	747
BNIP2	2.13E-05	7.16E-05	654
PPIG	7.73E-08	3.43E-07	1685
HIVEP2	1.23E-22	1.25E-21	873
CCDC91	3.68E-05	0.000119579	360
MAP4K4	9.85E-68	2.83E-66	1147
CSPP1	1.77E-11	1.04E-10	320
LPIN1	1.20E-17	1.00E-16	289
CNTRL	2.63E-20	2.44E-19	1049
KLC1	3.63E-84	1.32E-82	1120
CAPN2	1.92E-67	5.46E-66	338
RPS6KB1	1.04E-26	1.20E-25	1258
TNRC6B	0.00114038	0.00295104	1395
LOC420362	2.80E-05	9.24E-05	99
COL4A6	1.94E-68	5.67E-67	289
LUC7L3	1.24E-19	1.12E-18	1555
SCFD1	2.93E-09	1.47E-08	508
SCLT1	1.96E-65	5.37E-64	921
CLIC4	0.000889567	0.00234455	455
FSTL1	1.12E-09	5.82E-09	540
SERTAD2	4.21E-31	5.64E-30	1246
NT5DC1	0.000128899	0.000390635	626
RPLP0	1.46E-150	1.23E-148	2236
DYNC2H1	0.00102984	0.00268868	84
HSPE1	3.37E-21	3.25E-20	1909
FUNDC2	1.07E-05	3.74E-05	714
UBE2Q2	0.00010483	0.000321205	716
TMEM140	4.39E-11	2.52E-10	181
EWSR1	0.00188324	0.00466851	924
RB1	1.77E-31	2.39E-30	812
TLE1	8.31E-07	3.31E-06	587
ZC3H12C	1.53E-33	2.17E-32	413
CEBPD	3.67E-88	1.41E-86	1132
DAB1	0	0	744
HS6ST1	3.68E-35	5.51E-34	764
SLA	8.61E-216	1.42E-213	1643
GPR157	7.90E-17	6.30E-16	196
MAFF	3.30E-22	3.30E-21	658
DLG1	3.08E-16	2.37E-15	461
GSTK1	0.00190378	0.00471385	436
PHC1	0.00303369	0.00723269	206
SPTBN1	7.09E-57	1.70E-55	1022
PDIA5	3.58E-11	2.06E-10	706
NFATC1	6.72E-50	1.41E-48	440
TOP2B	1.83E-05	6.23E-05	1317
SLX4IP	0.00152095	0.00384373	149
RAB7A	7.10E-09	3.45E-08	1576
NBEAL1	7.31E-07	2.93E-06	221
NDFIP2	1.15E-54	2.61E-53	997
BIN2	7.81E-10	4.10E-09	895
MCUB	2.40E-23	2.51E-22	833
TTC14	0.000298976	0.000849103	380
ITGB2	1.36E-162	1.33E-160	987
ARID2	3.95E-13	2.59E-12	697
USP25	8.92E-31	1.18E-29	673
PREX1	1.32E-152	1.13E-150	1146
PNISR	1.68E-05	5.72E-05	1317
ABCD4	7.86E-90	3.08E-88	667
WDR36	8.80E-06	3.11E-05	1026
TMEM135	7.82E-15	5.63E-14	759
BSG	7.79E-16	5.89E-15	1441
SYK	1.71E-38	2.78E-37	690
DNAJA3	0.00028693	0.000818057	867
PRR5L	5.99E-07	2.43E-06	187
ELOVL6	1.59E-05	5.45E-05	269
LOC121111264	3.54E-06	1.32E-05	43
RBP5	0.000870235	0.0022969	1177
ANKRD11	4.61E-07	1.89E-06	1487
ACVR2A	0.000162766	0.000485456	670
CHMP1B	3.20E-21	3.09E-20	765
GRID2	0.00010297	0.000315967	59
QSER1	0.00254177	0.00614738	402
PCDHGA2	0.00421193	0.00975607	145
MKRN4P	8.60E-05	0.00026719	1043
ADGRL3	1.25E-13	8.37E-13	342
NUCKS1	1.40E-07	6.08E-07	2083
TFDP2	4.02E-12	2.47E-11	1119
KIF13A	4.25E-174	4.65E-172	839
UHRF2	8.70E-09	4.19E-08	932
NDRG1	2.95E-28	3.58E-27	884
PPP4R1	4.97E-07	2.03E-06	792
DDX5	1.43E-19	1.29E-18	2228
MRPL1	0.00252921	0.00611903	1298
CAMK2D	1.50E-69	4.41E-68	1233
KMT5B	5.40E-28	6.50E-27	1102
CCND1	1.67E-12	1.05E-11	1405
RALGPS2	9.20E-13	5.91E-12	662
KIAA0232	5.34E-97	2.41E-95	829
ARHGAP5	3.27E-13	2.15E-12	667
CCT4	2.22E-05	7.45E-05	1705
FAM167B	0.00229873	0.00560297	28
TFRC	3.57E-32	4.94E-31	1306
ITSN1	1.05E-05	3.68E-05	677
CARHSP1	2.85E-08	1.32E-07	1113
CNKSR2	2.74E-09	1.38E-08	105
NSUN3	0.00183457	0.00456173	272
LATS2	4.50E-10	2.41E-09	385
HLCS	0.000222196	0.000649513	392
LOC426820	3.33E-08	1.53E-07	44
HEMK1	0.000210263	0.000617211	402
RPS10	7.12E-101	3.55E-99	2246
H2AZ2	6.95E-38	1.11E-36	1970
PAXBP1	0.0006075	0.00164423	971
ARHGAP28	7.35E-87	2.78E-85	317
RPL21	7.82E-66	2.16E-64	2296
CDV3	2.79E-08	1.29E-07	1547
RPS26	1.96E-111	1.09E-109	2063
PTDSS1	2.89E-24	3.10E-23	533
CD99L2	0.00171176	0.00428686	410
LAMA3	7.17E-74	2.24E-72	212
GPCPD1	4.82E-32	6.63E-31	804
YAF2	4.06E-05	0.000131515	912
SLC2A14	1.28E-05	4.44E-05	1224
BROX	2.31E-05	7.72E-05	300
CORO1C	5.49E-94	2.35E-92	1655
SH3PXD2B	0.000124767	0.000378425	136
GSN	4.42E-212	6.76E-210	1140
WRN	7.86E-26	8.83E-25	426
ATXN7L1	4.48E-07	1.85E-06	559
RBPJ	2.85E-17	2.32E-16	717
SUPT16H	0.000276422	0.000790862	829
RSRP1	6.90E-22	6.82E-21	672
KARS	7.37E-06	2.63E-05	1631
LOC124417794	1.10E-09	5.72E-09	404
JARID2	8.32E-09	4.02E-08	1205
KIF3A	0.00291305	0.00697071	428
GNAS	5.38E-05	0.000171876	1215
TOX2	5.69E-90	2.24E-88	628
MACROD2	5.90E-18	4.97E-17	791
RPL34	1.78E-91	7.13E-90	2318
CDC5L	0.00103646	0.00270453	1242
BET1L	2.99E-06	1.12E-05	510
NAA50	2.88E-07	1.21E-06	1233
TEF	6.77E-40	1.14E-38	491
NT5C3A	5.67E-12	3.45E-11	552
DNAJC24	6.30E-11	3.57E-10	675
MT4	1.67E-22	1.69E-21	761
OXCT1	9.49E-05	0.000292891	1053
CNOT11	8.00E-08	3.55E-07	769
MAP6D1	3.49E-15	2.57E-14	155
ZCCHC11	1.19E-16	9.37E-16	904
FSHR	0.00197613	0.00488066	26
UBXN6	6.85E-09	3.33E-08	232
IER3IP1	7.02E-05	0.0002209	993
SRPK1	1.11E-08	5.32E-08	1213
RPL38	9.81E-62	2.51E-60	2276
NMRK1	0.00156423	0.00394632	411
RAP1B	7.28E-09	3.53E-08	1505
RNF213	7.33E-09	3.55E-08	163
BCKDHB	4.73E-08	2.14E-07	351
TBCK	1.04E-06	4.09E-06	395
ERCC6	0.00280272	0.00672863	569
RIMKLB	6.02E-24	6.40E-23	649
C1orf159	6.89E-06	2.46E-05	244
UBAP2	4.68E-31	6.25E-30	935
CGAS	1.42E-05	4.88E-05	479
KCNMA1	7.80E-10	4.10E-09	162
TSHZ3	0.00323538	0.00767822	102
FUBP1	1.78E-10	9.81E-10	1626
DHRS3	0.00272386	0.00655689	178
MET	0.000191481	0.000565016	41
PLA2R1	1.45E-36	2.25E-35	376
ACADL	0.000951009	0.00249493	1130
LOC107054270	1.08E-08	5.15E-08	120
SDC2	1.90E-61	4.84E-60	271
TIAM2	0.00321935	0.00764635	162
ATP11C	1.42E-301	3.67E-299	1243
RPL6	5.98E-86	2.24E-84	2336
CCDC85A	0.000121483	0.000368846	39
EIF4A2	6.18E-05	0.000196193	2196
RNF103	6.07E-12	3.69E-11	390
C7orf50	6.76E-15	4.88E-14	773
P3H1	4.32E-14	2.98E-13	593
PRDM16	2.31E-05	7.72E-05	208
LOC112532578	7.68E-07	3.08E-06	22
DOCK4	0	0	758
RPS12	1.01E-172	1.10E-170	2343
KAT2B	8.60E-07	3.42E-06	292
CETN2	0.00192308	0.00475682	401
LOC101747613	0.00223703	0.00546345	22
MOB4	0.000271115	0.000777042	938
UBAC2	2.26E-07	9.60E-07	790
MCTP1	1.15E-64	3.10E-63	416
ARGLU1	4.79E-13	3.12E-12	1592
BCL2	1.76E-09	8.99E-09	859
XK	0.00346841	0.00816526	13
GLG1	4.38E-05	0.000141569	761
TRPS1	5.46E-29	6.86E-28	675
FAM21C	6.05E-20	5.56E-19	748
OPHN1	0.000215202	0.000630574	116
HDGF	4.42E-15	3.24E-14	2003
ARHGAP29	2.80E-09	1.41E-08	534
AP1S2	2.63E-19	2.34E-18	1237
BAMBI	2.28E-06	8.69E-06	162
PHF14	1.32E-05	4.55E-05	741
ESD	1.13E-14	8.09E-14	1313
TNRC18	0.000108398	0.000331379	716
PPARG	8.38E-55	1.90E-53	240
UPF2	2.53E-24	2.73E-23	1292
ZNF326	2.18E-05	7.33E-05	1419
USP9Y	2.80E-13	1.85E-12	1177
GIMAP7L5	0.0035396	0.00831417	1157
TECPR2	1.80E-90	7.15E-89	575
SNX8	6.39E-13	4.14E-12	369
SPAG16	0.00044236	0.00122481	126
SMIM19	7.24E-05	0.00022705	947
FAM46A	2.26E-06	8.63E-06	609
PLEKHA1	7.33E-89	2.87E-87	765
PPIL2	0.00192433	0.00475913	800
LY75	2.27E-39	3.78E-38	805
SORCS2	3.91E-30	5.09E-29	530
NFU1	0.00200635	0.00494796	1004
RSRC1	0.00154931	0.00391205	754
PGM2L1	0.0007388	0.00197341	262
NCKAP1	4.93E-11	2.82E-10	106
HCFC2	3.43E-12	2.11E-11	540
PLEKHA5	0.00290312	0.00695149	224
ACVR2B	3.66E-15	2.69E-14	748
NUTF2	3.17E-07	1.32E-06	1534
MAP7D3	5.82E-08	2.61E-07	1116
FOXP1	5.32E-16	4.06E-15	1653
PLXNA4	1.46E-06	5.69E-06	53
STIM2	2.78E-13	1.84E-12	1108
WWTR1	0.000211704	0.000621068	64
SPICE1	0.00150795	0.00381547	245
MAF	8.31E-05	0.000258526	109
MPHOSPH8	2.17E-05	7.31E-05	552
MGAT5	1.67E-17	1.38E-16	915
SLC47A1	1.41E-12	8.96E-12	240
SMCO4	0.00214473	0.00525814	502
ARHGAP17	1.98E-159	1.87E-157	990
HNRNPA2B1	8.05E-15	5.79E-14	1960
TRAF7	1.38E-22	1.40E-21	627
TJP1	0.0002319	0.000674859	54
HMGB1	1.27E-41	2.19E-40	2201
RPL23	2.30E-92	9.42E-91	2308
SPECC1L	1.66E-33	2.36E-32	915
PRELID1	5.32E-17	4.29E-16	1899
FABP3	4.21E-138	3.15E-136	852
ANK3	8.94E-08	3.94E-07	134
RPL11	1.01E-67	2.91E-66	2245
PIKFYVE	8.34E-30	1.08E-28	776
PID1	2.31E-25	2.56E-24	257
RAB1B	2.97E-52	6.49E-51	1963
SUPT3H	0.000677949	0.0018198	264
CERKL	0.00281952	0.00676685	213
PPFIBP2	8.36E-35	1.24E-33	224
UTRN	7.03E-37	1.10E-35	1441
FAM135A	2.11E-05	7.10E-05	485
PKP2	0.000244458	0.000706987	35
MICAL3	1.08E-14	7.71E-14	168
LYAR	6.16E-15	4.46E-14	1010
AOPEP	3.49E-06	1.30E-05	311
ZRANB1	8.14E-05	0.000253685	899
CDC42BPB	3.29E-65	8.96E-64	1113
C1orf21	2.16E-14	1.52E-13	245
MTOR	3.34E-19	2.97E-18	626
SH3BGRL	0.00107171	0.00278807	1099
NRARP	0.000288584	0.000822133	125
CAST	2.91E-128	2.00E-126	1235
FNBP1	1.58E-49	3.29E-48	1330
PIK3IP1	7.49E-20	6.85E-19	433
PAICS	1.44E-18	1.25E-17	831
TRANK1	2.59E-06	9.81E-06	242
ACVR1C	0.000525765	0.00143946	583
ZNF148	8.16E-07	3.25E-06	444
C14orf2	1.51E-16	1.19E-15	1754
SLTM	0.00245113	0.00595071	1258
SRGAP1	1.09E-06	4.30E-06	176
SPOP	2.19E-10	1.20E-09	821
MKL1	1.65E-16	1.29E-15	885
DISC1	3.50E-13	2.30E-12	234
LY6E	8.04E-16	6.08E-15	699
HOOK3	4.76E-10	2.54E-09	645
AKAP13	1.39E-24	1.52E-23	1535
SLC16A10	6.37E-06	2.29E-05	653
ZNF652	0.00204023	0.0050204	257
SSX2IP	0.00110569	0.00286734	24
DDX49	0.000386765	0.00108169	610
LOC124417205	0.00052709	0.00144228	766
ANKRD10	4.47E-28	5.39E-27	1451
BRD2	0.000440853	0.00122087	1544
STARD9	1.21E-17	1.00E-16	190
LOC427439	1.98E-07	8.46E-07	1313
CCDC173	1.95E-07	8.33E-07	1098
DEF6	7.86E-34	1.13E-32	1425
MTF2	0.00179382	0.00447329	1253
CCDC18	0.00364544	0.00854365	299
ECHS1	0.00106762	0.00277794	894
CTBP2	1.05E-34	1.54E-33	1230
LETM1	1.42E-09	7.28E-09	539
CMC1	0.0012641	0.00324263	355
TNIK	3.49E-34	5.07E-33	815
NTRK3	1.05E-51	2.26E-50	232
HBS1L	0.00078966	0.00210009	667
RPL3	8.48E-112	4.75E-110	2271
LOC121107791	0.00105815	0.00275623	580
EFCAB5	2.56E-60	6.43E-59	339
ZFYVE26	4.46E-26	5.04E-25	423
ZCCHC7	2.85E-23	2.97E-22	636
EPB41L3	0.000304147	0.000862789	81
DUSP10	0.00046383	0.00128015	981
FAM120C	8.14E-07	3.25E-06	1299
PLA2G4A	4.00E-07	1.66E-06	789
COMT	2.29E-09	1.16E-08	964
RAE1	7.28E-05	0.000228354	746
PLXNB2	1.53E-163	1.51E-161	514
KCNB2	2.87E-05	9.47E-05	27
PTGER4	0.000468344	0.00129188	1085
HERC1	1.75E-78	5.75E-77	1120
DLGAP2	0.000130221	0.000394396	37
GTF2H1	3.76E-07	1.56E-06	796
PRKAB1	0.00153406	0.00387487	561
ARHGEF10	7.27E-09	3.53E-08	84
FUT8	4.52E-09	2.24E-08	1023
C1orf131	1.69E-13	1.13E-12	753
KLHL29	7.67E-18	6.42E-17	184
PPP1R19L	2.13E-06	8.15E-06	76
VCAM1	0	0	840
MTMR6	0.000865445	0.0022859	380
KIF26B	4.96E-07	2.03E-06	76
AKAP1	6.38E-06	2.29E-05	873
NRG3	2.13E-53	4.72E-52	304
RPS15A	7.72E-93	3.19E-91	2322
HELZ2	1.69E-05	5.78E-05	95
RPL5	1.01E-65	2.77E-64	2322
LRRC2	0.000577119	0.0015701	15
BLMH	4.83E-05	0.00015531	1231
SFPQ	5.55E-07	2.26E-06	1784
CKAP5	1.95E-17	1.61E-16	723
MDM2	4.72E-44	8.70E-43	951
ENO1	1.37E-22	1.39E-21	2305
FMR1	4.75E-09	2.35E-08	833
KLHL2	3.72E-05	0.000121051	364
STRN	4.39E-06	1.62E-05	579
BEND7	8.16E-10	4.28E-09	476
TRAK1	5.10E-10	2.72E-09	391
LOC121111665	0.00153709	0.00388185	46
LOC124417336	4.71E-12	2.88E-11	72
PTPRE	6.14E-08	2.75E-07	449
MYC	7.47E-16	5.66E-15	685
TPP1	1.90E-18	1.63E-17	1089
AHR1A	3.67E-116	2.22E-114	818
GANC	6.32E-50	1.33E-48	395
RSRC2	3.47E-30	4.52E-29	1298
LOC107053450	0.00117361	0.0030329	182
TLN1	7.99E-28	9.61E-27	1238
VPS13D	0.00128653	0.00329441	843
KLF2	0.00027294	0.000781966	1443
ZFR2	6.29E-07	2.54E-06	615
SF3B1	2.29E-18	1.96E-17	1393
LOC121107538	4.92E-15	3.59E-14	1525
ATF4	7.53E-10	3.96E-09	2031
MAPKAP1	7.19E-05	0.000225661	547
XRN1	9.01E-12	5.40E-11	695
SMURF2	3.31E-07	1.38E-06	416
RPL36	1.31E-98	6.12E-97	2183
FUS	7.05E-05	0.000221719	1060
BTG2	8.94E-180	1.02E-177	1580
DDX17	4.85E-10	2.58E-09	1465
PIM3	1.06E-27	1.26E-26	776
FAM65C	2.81E-10	1.52E-09	563
RFX7	0.00244902	0.00594658	479
KIF13B	1.03E-28	1.28E-27	338
MARK3	3.72E-22	3.71E-21	1167
NEUROD6	0.00178481	0.00445156	19
ACSS2	6.29E-07	2.54E-06	742
VPS13B	1.57E-06	6.06E-06	549
MCCC2	9.31E-103	4.76E-101	645
ATG2A	1.08E-07	4.74E-07	541
SNX24	9.63E-09	4.63E-08	72
GOLGA1	4.08E-23	4.22E-22	745
ABCC4	2.28E-27	2.70E-26	514
PDE4D	2.02E-05	6.83E-05	802
RFC5	5.05E-31	6.74E-30	1334
ID2	5.83E-08	2.62E-07	1344
PIK3R1	3.49E-08	1.60E-07	1649
LOC107052167	0.000706199	0.00189114	45
PSMA3	3.08E-06	1.16E-05	1733
IK	7.29E-45	1.36E-43	1442
MKL2	0.00132109	0.0033735	525
SRSF4	0.00117414	0.0030336	595
SLC20A2	1.76E-13	1.18E-12	318
IL15	0.00393373	0.00916955	83
SH3PXD2A	0	0	918
IRF7	9.22E-07	3.66E-06	204
MDN1	1.14E-13	7.71E-13	883
VTI1A	0.000420504	0.00116914	396
PPP6R3	0.00244259	0.00593293	832
ROBO2	0.001416	0.00359771	153
SYBU	1.12E-09	5.80E-09	93
ARID4B	2.33E-05	7.80E-05	1144
ND3	4.20E-06	1.55E-05	2070
AKAP9	8.46E-15	6.07E-14	1124
MIS18BP1	0.000995211	0.0026029	559
ATP5G3	1.95E-17	1.61E-16	2107
PLEKHG1	8.34E-33	1.17E-31	310
IRF2	0.0041007	0.00951945	897
AMPD3	1.52E-16	1.19E-15	283
SURF2	2.72E-16	2.10E-15	755
FLNB	5.49E-70	1.63E-68	1198
PRKD1	3.24E-32	4.49E-31	487
HNRNPA3	2.02E-08	9.42E-08	2260
MAN1A2	3.77E-05	0.000122505	447
LRRC4C	4.58E-05	0.000147516	93
SFSWAP	5.57E-07	2.27E-06	991
ABCD2	6.39E-08	2.86E-07	912
HIF1A	0.00285613	0.00684566	1102
C10orf128	1.55E-38	2.52E-37	260
FAM169B	2.43E-08	1.13E-07	552
ENOX1	1.37E-05	4.72E-05	77
STIM1	1.83E-05	6.21E-05	706
KIDINS220	1.50E-19	1.35E-18	959
PAN3	4.01E-06	1.49E-05	798
ANXA1	4.95E-48	9.96E-47	138
HMGN5	0.000114383	0.000348515	1873
PRKAR2A	4.68E-100	2.28E-98	1320
LHFPL3	2.88E-12	1.78E-11	109
NRDC	5.73E-09	2.81E-08	1051
RPS27	7.06E-92	2.87E-90	2209
HCN1	8.96E-05	0.000277671	88
DOCK3	3.53E-06	1.32E-05	51
PTK2	1.27E-24	1.38E-23	564
PTPN2	0.000428406	0.00118886	1465
KCTD5	0.00172214	0.00430842	1113
TRAPPC2L	1.10E-49	2.30E-48	613
ROCK1	5.04E-24	5.37E-23	1346
AARSD1	0.0011838	0.00305532	730
WNK2	1.84E-09	9.37E-09	163
ADAM10	3.17E-34	4.61E-33	1429
PRDX6	4.85E-19	4.28E-18	1201
ZYX	2.41E-12	1.50E-11	1679
TFDP3	7.12E-21	6.77E-20	1153
NF1	8.55E-44	1.57E-42	1074
LOC107055055	8.38E-11	4.70E-10	156
ORC1	1.69E-12	1.06E-11	445
PPP4R2	1.18E-18	1.02E-17	1107
ARHGEF12	9.70E-58	2.34E-56	828
SRSF10	0.00424254	0.00981923	1628
RAP1GDS1	4.64E-52	1.01E-50	1060
VCPKMT	1.90E-10	1.04E-09	761
CNTNAP2	0.00221467	0.00541508	307
MYH10	8.39E-17	6.69E-16	640
MYEF2	0.00186271	0.00462465	585
BTBD8	1.72E-05	5.87E-05	259
EHD3	2.56E-24	2.75E-23	1211
APLP2	1.82E-19	1.64E-18	1277
EIF3J	0.00087849	0.00231744	1404
PTTG1IP2	1.66E-34	2.45E-33	1192
MAEA	4.54E-08	2.06E-07	563
SLC30A1	0.00261871	0.00632098	425
EIF5B	2.37E-14	1.66E-13	1601
ELP4	0.0034126	0.00804548	163
KLF6	4.91E-15	3.59E-14	1667
FLI1	1.27E-09	6.57E-09	976
FLRT2	9.04E-45	1.69E-43	243
ABCA1	9.04E-86	3.38E-84	433
MGA	4.02E-11	2.31E-10	793
GNB4	1.81E-07	7.77E-07	1256
TTLL5	4.47E-06	1.64E-05	499
FBXO3	9.98E-10	5.19E-09	635
TBXAS1	3.67E-105	1.92E-103	1066
CDK17	1.15E-09	5.96E-09	966
SLC44A1	2.68E-42	4.71E-41	544
SETD2	0.0040779	0.00947703	765
ADK	0.00192005	0.00475014	631
MRPL42	0.00325329	0.00771324	789
MAP2K6	3.90E-05	0.000126664	125
DACH1	8.45E-09	4.08E-08	204
KMT2C	7.13E-09	3.46E-08	1192
SACS	0.00335993	0.0079417	604
SLC23A2	2.57E-12	1.59E-11	450
RREB1	0.00399948	0.00931098	722
WDR48	1.36E-06	5.29E-06	393
LOC121106455	9.46E-10	4.93E-09	509
PSMD10	9.87E-09	4.74E-08	875
SYTL2	1.13E-10	6.30E-10	430
PBX1	6.33E-05	0.000200697	520
MCRIP1	5.77E-06	2.09E-05	1183
THOC2	1.65E-05	5.62E-05	1669
ACSL1	7.89E-22	7.77E-21	429
LOC124416941	0.00389517	0.00908687	230
HPS3	2.18E-07	9.26E-07	597
BDH1A	0.000263999	0.000757978	1054
RHOA	2.43E-25	2.69E-24	2137
RPL24	9.80E-85	3.60E-83	2255
NONO	1.02E-06	4.03E-06	1700
DNLZ	6.07E-10	3.21E-09	960
SLC39A10	5.80E-46	1.11E-44	668
RPL12	3.48E-131	2.46E-129	2250
CTR9	0.000906407	0.00238594	826
ST7	1.54E-07	6.68E-07	316
PTMS	1.27E-23	1.34E-22	1460
NSMAF	2.03E-28	2.49E-27	682
SFT2D1	5.31E-107	2.84E-105	1373
MPP7	1.90E-26	2.16E-25	352
VIPR1	6.34E-06	2.28E-05	188
RPLP1	7.44E-59	1.82E-57	2345
MYO1E	6.78E-15	4.89E-14	209
ZNF521	2.72E-11	1.59E-10	169
ALPK1	0.000395804	0.00110571	171
GOLIM4	1.61E-138	1.22E-136	1016
UQCRHL	4.11E-46	7.94E-45	1917
WTAP	1.11E-06	4.37E-06	1124
BRAF	1.06E-08	5.10E-08	939
MTMR12	1.71E-36	2.65E-35	659
CDC14B	9.75E-06	3.43E-05	483
SLC24A4	5.98E-82	2.09E-80	669
PTCRA	0.00269949	0.00650314	258
NYX	2.08E-08	9.70E-08	1748
ARRDC2	5.29E-19	4.65E-18	414
LUZP2	6.10E-06	2.20E-05	63
HERC2	5.46E-12	3.33E-11	962
AP3B1	2.48E-28	3.02E-27	884
IPO5	2.34E-16	1.81E-15	1275
PCDH9	0.0020225	0.00497928	103
AGL	0.000136386	0.000412219	474
EPB41L2	4.79E-32	6.59E-31	548
ZCCHC8	4.96E-06	1.81E-05	518
TMEM47	6.57E-49	1.35E-47	266
SAFB	3.81E-06	1.42E-05	1296
EIF5	4.68E-15	3.43E-14	2119
MYCBP2	0.000224875	0.000656427	1458
PLXNC1	6.22E-63	1.62E-61	1082
LOC415641	0.000298063	0.000847002	1037
PGD	2.89E-23	3.00E-22	1056
RUBCNL	1.88E-42	3.33E-41	982
ANAPC13	2.30E-05	7.72E-05	544
NEBL	3.04E-13	2.00E-12	333
MAFB	0	0	807
KCNK5	7.33E-99	3.45E-97	412
ZMYM2	1.38E-10	7.66E-10	535
ZNF292	4.97E-05	0.000159424	519
DDHD2	0.000103723	0.000318214	90
TTC39C	4.28E-05	0.000138393	269
NAP1L4	2.42E-07	1.02E-06	1289
EXOSC9	4.02E-08	1.83E-07	649
POLR2B	0.00159676	0.00402495	664
KCNQ5	1.39E-66	3.88E-65	574
SH3GLB2	2.51E-43	4.54E-42	296
SLC16A7	4.72E-11	2.70E-10	279
GDPD5	0.00400345	0.00931875	251
MED13L	2.04E-10	1.12E-09	988
AHCTF1	8.37E-08	3.70E-07	766
LGMN	1.78E-08	8.35E-08	275
ABHD12B	6.13E-07	2.48E-06	365
PALM2AKAP2	5.30E-21	5.07E-20	197
LRRC20	1.50E-08	7.08E-08	460
DAW1	0.000451334	0.00124801	54
S100A6	2.19E-31	2.96E-30	236
RABEP1	3.11E-33	4.38E-32	793
SASS6	0.000204899	0.000601946	503
SCOC	2.97E-06	1.12E-05	635
RPS25	2.62E-82	9.23E-81	2239
CHN2	7.95E-06	2.83E-05	175
RPS28	1.56E-133	1.12E-131	2191
STAT5A	2.39E-08	1.11E-07	863
MYO9B	3.76E-231	6.82E-229	1446
PDS5A	3.67E-05	0.00011936	868
DAP	1.69E-51	3.62E-50	966
GMIP	1.75E-26	2.00E-25	658
SBF2	2.72E-29	3.46E-28	581
ZDHHC20	0.0026064	0.0062954	720
VDAC1	4.06E-10	2.18E-09	369
MYOF	2.05E-220	3.55E-218	603
NCOA4	2.70E-05	8.96E-05	826
TBC1D5	1.86E-118	1.16E-116	1457
RAB3GAP2	0.00201366	0.00496084	526
UHRF1BP1L	0.000426268	0.00118315	199
WDFY4	0	0	789
RPL18A	2.47E-76	7.87E-75	2264
GAK	0.000480864	0.00132343	826
OSBPL3	1.07E-16	8.44E-16	286
TBL1X	1.25E-11	7.41E-11	1213
LOC776067	1.81E-20	1.69E-19	1502
SERBP1	1.10E-75	3.50E-74	2178
EIF1AX	0.000224122	0.000654363	1506
INO80D	0.000824899	0.00218628	352
WBP4	5.38E-07	2.19E-06	864
MCAT	1.95E-08	9.12E-08	645
ANO6	1.88E-17	1.55E-16	135
VAPA	2.64E-10	1.43E-09	1337
PGGT1B	0.000312404	0.000884844	487
CPNE8	1.79E-08	8.40E-08	380
CTNNA1	1.93E-44	3.58E-43	1250
WDFY3	5.54E-11	3.15E-10	346
ITGA1	1.22E-05	4.24E-05	357
PSMB7	1.34E-06	5.24E-06	1756
CHMP7	5.29E-07	2.16E-06	699
GORASP2	0.000923635	0.00242781	869
KANSL1L	5.33E-07	2.17E-06	353
CD36	2.09E-06	7.98E-06	130
AXL	1.90E-12	1.19E-11	238
PDZRN3	2.67E-07	1.12E-06	103
CUX1	2.12E-24	2.30E-23	1488
CARMIL1	5.27E-21	5.04E-20	263
CPNE4	5.37E-43	9.58E-42	269
TBL1XR1	0.00137782	0.00350616	1049
NFIL3	6.15E-16	4.68E-15	425
GUK1	4.01E-05	0.000130129	809
NAE1	0.00336077	0.00794241	771
TOMM7	0.00053609	0.00146527	1896
CLTC	0.00224252	0.00547595	1296
AP3S1	0.00200091	0.00493688	841
FAM162A	1.51E-12	9.53E-12	573
KIAA2026	2.92E-05	9.63E-05	679
RASSF6	2.51E-159	2.36E-157	675
LOC107053863	6.06E-05	0.000192563	407
SAP130	4.60E-07	1.89E-06	598
CRAMP1	1.44E-06	5.60E-06	688
PTPN14	9.47E-15	6.79E-14	221
IGFBP2	0.000137763	0.000415867	67
TBC1D13	5.23E-07	2.14E-06	270
RBM10	5.38E-10	2.86E-09	1645
D2HGDH	8.17E-19	7.15E-18	316
SRSF1	3.52E-07	1.47E-06	1806
WASHC1	0.00409282	0.00950391	485
FRA10AC1	0.00232616	0.00566607	497
DOCK5	1.09E-28	1.34E-27	193
PIGC	0.000293189	0.000834121	407
TMEM14C	7.78E-16	5.89E-15	1042
TBK1	0.000507668	0.00139303	554
ARPC2	1.50E-214	2.42E-212	1885
XPO7	7.66E-05	0.000239584	821
IFNAR1	1.16E-16	9.18E-16	562
FAM107B	3.82E-20	3.53E-19	710
RNF141	1.44E-25	1.61E-24	580
SDCBP	4.82E-15	3.53E-14	1405
TMEM165	0.00419819	0.00972886	685
JMJD1C	4.35E-08	1.97E-07	1254
CPEB3	1.86E-22	1.88E-21	303
F5	1.07E-14	7.63E-14	164
TBC1D4	8.98E-26	1.00E-24	965
PACSIN3	4.15E-19	3.67E-18	475
H3F3B	1.70E-20	1.59E-19	2247
RFWD2	2.85E-27	3.35E-26	769
EEA1	8.21E-28	9.85E-27	847
HM13	1.41E-09	7.25E-09	988
LOC101747452	5.94E-15	4.31E-14	1660
ARFGEF1	5.56E-07	2.26E-06	887
CLCN5	1.13E-38	1.85E-37	591
USP48	3.59E-08	1.64E-07	610
SPEN	0.000526446	0.00144078	1282
DNAJC13	5.18E-20	4.77E-19	616
GRK4	0.000504955	0.00138636	862
FBXO48	1.22E-10	6.79E-10	119
ZFC3H1	1.15E-36	1.79E-35	1075
TPT1	8.05E-16	6.09E-15	2286
NFKBIA	1.14E-101	5.77E-100	1594
CCDC50	7.52E-64	1.98E-62	912
FYN	2.21E-39	3.68E-38	736
SMAD7	1.00E-52	2.21E-51	473
LOC421106	3.25E-08	1.49E-07	813
GALM	2.72E-07	1.15E-06	418
APMAP	1.25E-30	1.65E-29	751
EMILIN2	1.32E-187	1.63E-185	531
DOT1L	4.87E-11	2.78E-10	761
APOOL	9.25E-05	0.00028609	601
CCNG2	1.56E-42	2.77E-41	1217
KDELR2	0.00157912	0.0039832	1176
PLXNA1	1.32E-184	1.56E-182	584
LIN28B	0.00281956	0.00676685	637
ZNF423	0.000564605	0.00153805	293
GHR	1.48E-06	5.74E-06	119
DPP7	1.04E-37	1.66E-36	647
NECTIN3	8.80E-05	0.00027283	81
DYTN	1.84E-14	1.29E-13	126
SETX	3.76E-05	0.000122319	686
SMAD3	6.77E-51	1.44E-49	778
ATP8A1	2.50E-32	3.48E-31	532
KIAA0930	9.02E-14	6.11E-13	310
RB1CC1	4.39E-06	1.62E-05	662
JUN	7.66E-43	1.37E-41	2000
ITGAV	5.32E-122	3.44E-120	1391
MAMLD1	2.49E-24	2.69E-23	687
BDP1	4.34E-05	0.000140239	726
ZNF318	1.04E-06	4.09E-06	445
NIFK	3.77E-05	0.000122505	1174
PA2G4	3.16E-43	5.69E-42	1933
ATP5F1AZ	2.45E-06	9.30E-06	1918
MRPL15	6.60E-23	6.80E-22	887
MAP3K20	0.000961937	0.00252171	316
DPH6	6.03E-06	2.17E-05	509
TEX2	4.90E-23	5.06E-22	923
PICALM	1.19E-07	5.19E-07	641
RPS2	5.51E-90	2.18E-88	2308
STXBP5	1.26E-20	1.18E-19	647
NCK1	3.93E-11	2.26E-10	693
FZD4	4.31E-19	3.81E-18	205
DIP2A	2.64E-21	2.56E-20	613
GOLM1	6.56E-18	5.51E-17	382
SRSF3	3.77E-08	1.72E-07	1870
USP34	0.000550237	0.00150226	852
RPLP2	8.90E-71	2.69E-69	2284
MYO1B	3.34E-05	0.000109395	147
TMEM123	1.27E-05	4.40E-05	604
LSM1	0.000250119	0.000722079	660
DIAPH3	8.57E-22	8.43E-21	288
CCN2	9.26E-06	3.27E-05	106
ZNF280D	0.00119902	0.00309138	818
LY96	2.97E-22	2.98E-21	726
AFF2	2.87E-05	9.48E-05	657
CHID1	6.74E-15	4.87E-14	338
CPEB2	3.68E-06	1.37E-05	285
LOC107052740	2.71E-05	8.98E-05	1069
KDM3A	7.25E-20	6.64E-19	878
PCNT	1.01E-06	4.01E-06	841
KAT7	0.002368	0.00576319	952
DICER1	2.75E-36	4.25E-35	1039
NRXN3	0.000323662	0.000915141	106
B4GALT7	1.17E-37	1.86E-36	1120
SRSF2	3.18E-21	3.07E-20	1796
SYN3	1.67E-23	1.76E-22	263
RASGEF1A	1.65E-171	1.75E-169	1534
SMPD3	2.72E-07	1.15E-06	432
BTRC	5.51E-16	4.21E-15	336
ANXA5	4.08E-38	6.57E-37	714
TRIP12	5.54E-12	3.38E-11	1078
EXOSC7	0.0021558	0.00528264	756
NDUFB11	1.13E-12	7.19E-12	1267
SPAST	2.93E-05	9.64E-05	617
LNPEP	7.50E-17	6.00E-16	1014
ND1	1.99E-15	1.48E-14	2274
TTC7B	5.01E-14	3.44E-13	387
VAV3	2.00E-30	2.63E-29	1326
HDAC1	0.00103538	0.00270218	713
DUSP23	0.000579628	0.00157576	978
ZNF407	5.21E-06	1.90E-05	562
RPL29	6.96E-87	2.64E-85	2248
ALDH7A1	0.00025946	0.000745966	1039
IKBKE	8.33E-10	4.36E-09	328
IFNGR1	1.59E-88	6.19E-87	912
MGP	4.28E-12	2.63E-11	254
PCM1	4.33E-06	1.59E-05	813
TIMM10	9.23E-63	2.40E-61	1240
GLS2	1.30E-06	5.07E-06	1383
ULK2	2.57E-09	1.30E-08	585
BCLAF1	1.17E-05	4.08E-05	1420
FKBP3	6.27E-35	9.33E-34	1690
LLGL2	2.40E-06	9.10E-06	373
HSPA8	6.33E-17	5.08E-16	2230
PIAS1	2.56E-24	2.75E-23	1069
PIP4K2A	3.85E-13	2.52E-12	1509
MAP3K5	1.95E-25	2.16E-24	612
PRODH	3.86E-06	1.43E-05	58
GNPTAB	2.73E-11	1.59E-10	797
PRKAA1	0.0020811	0.00511239	478
ST13P5	8.68E-08	3.83E-07	1577
LOC107055472	1.13E-09	5.87E-09	411
UBB	9.94E-15	7.12E-14	2153
LOC419404	2.51E-31	3.39E-30	627
NFKB1	4.28E-30	5.57E-29	1416
NCOR1	6.74E-16	5.12E-15	812
NRIP1	0.00258707	0.00625077	408
CALCRL	1.70E-05	5.82E-05	462
CGNL1	6.92E-15	4.99E-14	326
ARID5B	2.21E-56	5.17E-55	740
OSBPL1A	0.00206914	0.00508472	876
PON1	0.0023949	0.00582384	133
CACYBP	0.00148494	0.0037592	1324
PPM1F	3.56E-24	3.80E-23	526
DHRS7	6.09E-24	6.47E-23	1290
HBEGF	0.000162138	0.000483777	151
LOC770141	7.46E-08	3.31E-07	315
SERPINE2	2.48E-19	2.21E-18	600
APPL2	4.08E-05	0.000131968	355
RBM33	0.000520573	0.00142604	926
EIF4B	5.49E-34	7.93E-33	1575
SRSF5A	1.69E-07	7.26E-07	1437
PPP1R9A	2.15E-29	2.74E-28	663
UBR3	8.29E-05	0.000257941	670
PSMC3IP	9.25E-15	6.63E-14	871
LCP2	1.05E-79	3.50E-78	1444
FNBP1L	4.54E-23	4.69E-22	560
VGLL4	3.42E-40	5.81E-39	779
PHTF1	7.07E-14	4.81E-13	627
REXO1	1.14E-62	2.96E-61	912
ARID1B	0.000860064	0.00227251	1106
ACTA2	0.00181967	0.00453236	128
SESN1	0.000246684	0.000712304	975
TMEM167A	0.00388429	0.0090687	814
PARD3	8.91E-07	3.54E-06	372
CAPRIN1	1.17E-08	5.59E-08	1776
INPP4A	3.48E-10	1.88E-09	781
ZEB1	4.13E-38	6.65E-37	1131
NCOA7	1.45E-43	2.63E-42	627
LOC416169	2.19E-06	8.35E-06	586
PRKACB	2.42E-13	1.61E-12	1072
VIM	2.63E-97	1.21E-95	1877
DENND1B	6.39E-67	1.79E-65	1017
HEATR5A	7.83E-08	3.47E-07	691
SIPA1L2	0	0	858
DDX3X	1.28E-66	3.57E-65	1207
AHNAK2	1.40E-204	2.03E-202	543
ZMYND8	3.32E-12	2.04E-11	803
FAT4	6.67E-05	0.000210564	29
GPC1	1.44E-60	3.63E-59	501
NCL	4.77E-35	7.12E-34	2285
PKP4	2.74E-05	9.06E-05	309
PDGFB	1.17E-19	1.06E-18	176
MORC4	2.01E-24	2.17E-23	890
PLSCR1	2.58E-07	1.09E-06	1104
PHF2	9.17E-66	2.53E-64	538
SGK1	2.79E-42	4.91E-41	1206
DENND4A	2.81E-20	2.60E-19	1090
RAF1	0.000470259	0.00129692	582
TWF1	0.000169649	0.000504038	124
CPSF6	9.90E-05	0.000304823	1246
KDM4B	1.73E-05	5.91E-05	909
ST3GAL5	8.09E-10	4.24E-09	472
HOPX	1.20E-21	1.18E-20	474
LYPD1	0.000231298	0.000673573	81
PTPN1	3.40E-07	1.42E-06	963
CDYL2	0.000738017	0.00197167	167
WBP2	0.00193442	0.00478247	222
MGEA5	0.000345352	0.000972163	739
TTLL7	0.000280393	0.000801178	121
LOC772071	9.93E-05	0.000305626	780
TMEM39A	2.04E-11	1.20E-10	400
CORO7	2.10E-17	1.73E-16	1474
HIST1H101	8.32E-35	1.23E-33	797
PPP2R5A	2.33E-12	1.46E-11	1043
TBCC	5.03E-24	5.37E-23	666
YPEL1	2.58E-68	7.50E-67	1048
ERGIC2	4.86E-15	3.55E-14	1092
CD99	1.14E-08	5.46E-08	963
ADGRG6	4.07E-18	3.45E-17	101
PKIG	1.46E-69	4.32E-68	1135
RALBP1	0.000101459	0.000311658	1216
SYNJ2BP	1.00E-09	5.21E-09	472
ARRDC4	1.46E-06	5.69E-06	223
MCF2L	5.52365392050514e-321	1.7256131999168e-318	629
PHIP	4.74E-17	3.83E-16	1167
TMOD3	0.00099474	0.00260213	959
CENPC	1.23E-12	7.85E-12	331
KPNB1	0.000274613	0.000786146	1734
LPIN2	1.47E-166	1.51E-164	1535
YTHDC2	6.81E-23	7.00E-22	883
DYNC1H1	1.32E-18	1.15E-17	1411
KIF1B	6.02E-17	4.83E-16	939
HLF	8.09E-10	4.24E-09	343
BRICD5	4.72E-11	2.70E-10	584
PPP1CB	0.000462981	0.00127805	1483
AKT3	1.20E-05	4.18E-05	366
LSG1	1.28E-09	6.60E-09	765
FAM8A1	0.000985965	0.00258102	231
MAP7D1	1.58E-06	6.13E-06	317
ZC3H8	0.00015688	0.000469522	685
RERE	6.70E-07	2.70E-06	989
PKN2	3.77E-10	2.03E-09	1193
HOXA5	6.29E-56	1.46E-54	486
RAB11FIP2	2.18E-08	1.02E-07	229
COPE	1.93E-05	6.53E-05	1285
REEP5	0.00227251	0.00554432	848
SF3A1	1.02E-11	6.07E-11	1022
ADAMTS9	0.000160577	0.000479509	73
DDX10	8.45E-11	4.74E-10	867
TRERF1	2.55E-11	1.49E-10	314
ITGB1	1.63E-11	9.61E-11	1477
DPY19L1	0.000174014	0.000516275	565
LOC121106708	6.22E-08	2.78E-07	75
WDR1	1.64E-50	3.47E-49	1700
DBI	2.16E-10	1.18E-09	1899
TPPP	5.51E-06	2.00E-05	105
SELENOS	3.57E-05	0.000116421	1081
C2H6orf52	0.00431416	0.00997241	1121
STAG2	3.33E-05	0.000109107	1392
C16orf52	0.000717083	0.00191924	124
PIGN	0.00178091	0.00444259	159
ELL	1.29E-20	1.21E-19	960
LAMA2	4.48E-15	3.28E-14	110
NDFIP1	2.09E-05	7.05E-05	1531
XPA	2.92E-07	1.22E-06	1603
ATP11A	3.99E-22	3.97E-21	339
VCPIP1	1.16E-16	9.19E-16	465
MICU2	6.93E-13	4.47E-12	532
LOC107049580	1.13E-08	5.39E-08	707
CALM1	1.06E-32	1.48E-31	2207
LOC427025	3.32E-07	1.39E-06	188
MINOS1	0.000655577	0.00176297	1677
RAB11FIP4	1.65E-47	3.29E-46	1245
TEX10	1.59E-12	1.01E-11	1140
PPIB	3.60E-83	1.29E-81	1886
MAP4	8.04E-60	2.00E-58	893
ARHGAP18	3.59E-234	6.68E-232	703
ABI1	0.000647601	0.00174248	1108
NKTR	2.53E-11	1.48E-10	801
CDH2	4.09E-06	1.51E-05	72
PLCE1	0.0011759	0.00303708	50
GTF2I	1.44E-17	1.19E-16	532
PPP6R2	2.68E-11	1.56E-10	614
FILIP1L	1.32E-16	1.04E-15	105
AMY1A	4.59E-108	2.48E-106	537
DOCK10	2.66E-83	9.56E-82	1213
KDM7A	6.93E-36	1.06E-34	956
MON2	4.38E-12	2.69E-11	870
KIAA2022	0.000168115	0.000499782	26
SKI	0.00221691	0.00541823	410
CCDC92	1.65E-12	1.04E-11	152
SMARCA2	2.23E-23	2.33E-22	1419
ATAD1	7.49E-11	4.22E-10	909
LRRFIP1	3.74E-66	1.04E-64	1504
CPLX4	0.000641282	0.00172738	615
FHOD3	0.00266304	0.00642269	60
ADNP2	4.01E-07	1.66E-06	443
ARHGEF9	6.42E-18	5.40E-17	635
FKBP15	2.46E-58	5.96E-57	860
TRIO	2.47E-90	9.82E-89	1178
ANO3	0.000564303	0.00153751	55
CPD	2.22E-13	1.48E-12	435
CAMKMT	2.76E-10	1.50E-09	241
GOLGA2	1.75E-28	2.15E-27	551
PEAK1	0.000736334	0.00196753	201
DGKQ	4.69E-12	2.87E-11	410
BICD2	1.23E-17	1.02E-16	974
TRAPPC11	7.67E-11	4.31E-10	460
AUTS2	8.85E-52	1.91E-50	288
CPNE3	9.68E-07	3.83E-06	437
CYP46A1	5.27E-14	3.61E-13	141
CRY1	2.88E-07	1.21E-06	571
ST3GAL3	0.000583155	0.00158447	85
AKAP17B	0.00216204	0.00529706	298
NEK9	0.00087695	0.00231379	707
ATP6V0C	8.66E-05	0.000268633	1820
RSG1	0.00020285	0.000596405	1174
PANK3	4.98E-19	4.39E-18	1227
CTBP1	2.79E-49	5.81E-48	1362
CLINT1	3.31E-42	5.79E-41	983
EVI5	3.62E-08	1.66E-07	568
PDPK1	0.000356046	0.00100054	1073
KIF5B	8.99E-20	8.20E-19	1019
PTPRVP	0.000886117	0.0023363	63
PABPC1	4.93E-05	0.000158134	2316
ABCB7	0.000106799	0.000326899	550
NARFL	1.11E-06	4.37E-06	242
REPS2	2.98E-14	2.07E-13	319
VTA1	0.000531064	0.00145261	436
LOC107054033	0.00024079	0.000697341	73
MEF2D	1.10E-12	7.05E-12	871
NPC1	6.61E-26	7.44E-25	387
MECOM	6.31E-45	1.19E-43	349
RPL7A	1.06E-130	7.35E-129	2248
SDC4	2.23E-30	2.93E-29	435
SCML2	1.03E-08	4.95E-08	387
RUNX2	1.62E-19	1.46E-18	462
GABARAPL1	2.68E-09	1.35E-08	747
OPTN	7.77E-17	6.20E-16	567
FAM98A	0.00129655	0.0033166	423
SH3BGRL3	0	0	1926
EPHA6	0.00114864	0.00297084	47
IQGAP3	1.02E-28	1.27E-27	1574
PSMC1	0.0014038	0.00356981	1427
EML1	0.00240987	0.00585733	56
XPOT	0.000446665	0.0012358	971
HNRNPA1	3.36E-81	1.16E-79	1998
TANC1	9.49E-18	7.92E-17	314
CENPU	8.45E-11	4.74E-10	225
CHD9	1.34E-05	4.62E-05	1055
LOC101750610	1.38E-05	4.74E-05	41
FGD4	1.33E-306	3.83E-304	876
MANBA	1.26E-05	4.35E-05	1457
RSL1D1	9.80E-05	0.000302103	1169
ARHGAP12	1.11E-79	3.69E-78	794
TFPI2	1.93E-40	3.29E-39	214
HDAC9	0.000378035	0.00105848	143
MIGA2	1.06E-16	8.39E-16	213
SEC61B	1.63E-07	7.02E-07	1387
EEF2	8.22E-46	1.57E-44	2253
TMA7	0.000131601	0.000398329	1612
VPS4B	2.18E-16	1.69E-15	915
ERCC6L2	5.75E-53	1.27E-51	628
MTFR1L	8.38E-95	3.66E-93	814
INSR	6.69E-06	2.40E-05	391
EEF1B2	1.05E-94	4.59E-93	2278
GCOG8	0.000944261	0.00247936	617
TBC1D30	0.000200501	0.000589971	128
BRCA1	2.67E-07	1.13E-06	544
SKIL	8.49E-09	4.09E-08	256
NUMB	3.52E-10	1.90E-09	625
LOC107053920	5.34E-09	2.62E-08	655
MBNL3	5.76E-10	3.05E-09	1375
HNRNPD	3.01E-05	9.90E-05	1366
HPGD	0	0	737
EEF1D	2.74E-82	9.62E-81	2224
ANO4	4.95E-32	6.80E-31	125
LOC121106837	1.67E-06	6.42E-06	331
NR3C2	8.76E-15	6.29E-14	411
LOC101749809	2.48E-10	1.35E-09	75
IL20RA	0.00039431	0.00110174	20
TRAM2	2.00E-23	2.10E-22	482
LOC121107742	0.00191973	0.00475014	138
RAD21	8.54E-08	3.77E-07	947
ACTN1	1.00E-197	1.35E-195	1484
NUDC	1.88E-06	7.20E-06	1385
PMEPA1	4.72E-11	2.70E-10	376
ANXA2	9.59E-74	2.99E-72	583
PPP1R36	8.56E-10	4.48E-09	1723
USP3	9.32E-06	3.28E-05	935
FAR2	1.30E-09	6.67E-09	160
MORC1	0.00221971	0.00542297	419
STARD3NL	3.82E-13	2.51E-12	426
ZNF606	2.67E-11	1.56E-10	614
GTF2E2	9.74E-65	2.64E-63	653
TPM3	1.92E-16	1.49E-15	1997
ANKRD27	4.95E-07	2.03E-06	302
L3MBTL3	6.67E-46	1.28E-44	358
ACY1	0.00339605	0.0080129	432
KLF7	3.93E-37	6.20E-36	519
KDM4C	1.40E-18	1.22E-17	383
ZC3H13	2.37E-11	1.39E-10	1689
NACC2	9.32E-20	8.48E-19	220
OSBPL11	0.000403423	0.00112485	676
DYL1	9.90E-05	0.000304815	1823
CAPZA2	2.30E-24	2.48E-23	1549
CALR	5.14E-15	3.75E-14	1567
PEPD	9.25E-29	1.15E-27	835
ACADS	6.61E-10	3.49E-09	451
LOC100859737	2.20E-13	1.47E-12	2320
CLIP1	2.91E-21	2.82E-20	832
DAAM1	0.000132676	0.000401336	95
SEMA3DL	2.39E-20	2.22E-19	130
SEC62	9.03E-05	0.000279567	929
VAMP7	7.38E-07	2.96E-06	602
PRPF38B	2.05E-18	1.76E-17	1503
ND5	0.000816452	0.00216569	2155
CCDC171	1.20E-12	7.64E-12	583
MID1	1.45E-115	8.69E-114	396
SGMS2	5.23E-11	2.98E-10	231
SNRNP48	0.000815923	0.00216523	256
LZTFL1	2.94E-10	1.59E-09	295
ELL2	0.000500499	0.00137464	285
LOC101750640	0	0	564
NOTCH1	1.72E-14	1.22E-13	677
FCHO2	1.79E-05	6.11E-05	727
PARP4	1.46E-33	2.07E-32	739
ABCC5	1.19E-43	2.16E-42	707
HECW2	4.10E-06	1.52E-05	123
RPSAP58	9.36E-115	5.50E-113	2296
USP6NL	1.23E-20	1.15E-19	374
RGS4	6.63E-29	8.30E-28	1234
RPL36A	3.00E-94	1.29E-92	2138
LOC121110811	0.000116725	0.000355355	48
ALS2	9.12E-10	4.76E-09	386
SRSF5	1.39E-17	1.15E-16	653
LONRF3	4.13E-44	7.63E-43	347
NDUFB2	3.60E-11	2.08E-10	2005
SUSD3	2.44E-07	1.03E-06	792
USP45	0.000147466	0.000443334	581
TRPM1	0.000595648	0.00161572	40
LOC107053852	3.74E-99	1.77E-97	249
CHCHD10	6.22E-05	0.000197589	959
ZNRF1	6.87E-10	3.62E-09	1145
MTCL1	1.64E-25	1.83E-24	120
LRRK2	4.04E-90	1.60E-88	604
OSMR	0.000493779	0.00135644	44
MDFIC	8.27E-06	2.93E-05	738
CD81	6.15E-36	9.40E-35	1609
CKLF	1.29E-33	1.85E-32	1001
TSPAN32	3.77E-11	2.17E-10	295
DOPEY2	2.84E-12	1.76E-11	336
RNF149	0.0024483	0.00594582	312
SH3KBP1	1.29E-125	8.53E-124	1548
PDAP1	1.83E-05	6.23E-05	1705
RPS6KA3	1.15E-07	5.02E-07	1429
DNAJC18	0.000609429	0.00164793	549
AKAP8	1.17E-12	7.46E-12	866
SGCD	1.71E-22	1.73E-21	185
METRNL	1.67E-29	2.14E-28	577
LOC107054741	0.000110071	0.000336143	563
TNRC6A	1.05E-06	4.13E-06	735
OSBPL9	3.78E-87	1.44E-85	1119
TTC13	9.48E-18	7.92E-17	364
TMEM131L	4.37E-08	1.98E-07	682
POGLUT1	0.000322136	0.000911002	370
MICALL1	8.90E-19	7.77E-18	360
RARB	0.000168095	0.000499782	54
ZDHHC21	4.81E-21	4.61E-20	459
TOMM20	1.73E-23	1.82E-22	1735
BIN1	6.35E-196	8.40E-194	1229
DDOST	7.65E-16	5.80E-15	1326
NDUFV1	3.78E-16	2.90E-15	1447
MFGE8	9.40E-10	4.91E-09	297
NOL9	4.55E-34	6.60E-33	1369
R3HDM2	1.97E-06	7.56E-06	273
PDRG1	5.21E-34	7.53E-33	1387
DERA	5.09E-05	0.00016322	513
TUSC1	1.27E-05	4.39E-05	367
ERG	4.05E-115	2.40E-113	844
UQCRQ	1.51E-10	8.34E-10	1589
SEMA3C	1.53E-19	1.38E-18	108
TMEM63B	3.20E-07	1.34E-06	248
LMNB1	5.67E-11	3.22E-10	1126
UBTD2	9.76E-72	2.97E-70	629
LOC121113415	2.11E-20	1.97E-19	751
LOC101749407	0.00336681	0.00795283	18
PDCD6IP	6.09E-09	2.98E-08	1151
RPS11	2.12E-80	7.19E-79	2278
CELF4	0.00408705	0.00949227	59
TUBB6	1.39E-46	2.70E-45	1179
C4BPG	1.54E-61	3.92E-60	702
DAZAP1	0.00238128	0.00579359	1598
KIFAP3	7.91E-10	4.15E-09	296
AACS	2.87E-07	1.21E-06	289
APP	4.37E-21	4.20E-20	630
AMOT	0.000109579	0.000334709	349
EIF3A	9.95E-32	1.36E-30	1837
PLS3	5.17E-32	7.09E-31	482
PPP2R5E	9.75E-21	9.22E-20	1108
WWC2	1.07E-05	3.76E-05	56
CRNKL1	6.64E-09	3.23E-08	813
LARP1	1.79E-25	1.99E-24	1589
CHMP3	1.57E-27	1.86E-26	682
SPPL3	4.68E-06	1.71E-05	491
VCL	1.84E-10	1.01E-09	711
EIF3I	1.06E-31	1.44E-30	1676
SHTN1	5.27E-157	4.87E-155	756
FLT4	1.31E-58	3.21E-57	296
IPO7	1.02E-46	1.99E-45	1854
MKS1	2.35E-12	1.47E-11	204
COMMD4	0.000266956	0.000766017	1195
TATDN3	1.97E-06	7.56E-06	653
CD47	4.40E-29	5.55E-28	1654
SKA2P1	6.11E-15	4.43E-14	916
RPS3A	1.14E-99	5.49E-98	2322
LOC124417285	4.85E-05	0.000155813	88
STAB1	1.63E-05	5.57E-05	248
KIF16B	1.87E-06	7.16E-06	352
PTPRJ	8.31E-23	8.50E-22	452
GALNT9	0.000290399	0.000826823	163
ANO5	1.14E-07	4.97E-07	759
LMAN2L	0.000251269	0.000725114	429
LOC121108831	6.36E-47	1.25E-45	453
EMP2	0.0041266	0.00957353	70
RNASET2	4.76E-141	3.70E-139	1053
GPC4	0.00118835	0.00306653	137
IL1RAP	9.24E-05	0.000285791	581
VWF	7.50E-06	2.67E-05	77
RPS6KA2	1.11E-14	7.94E-14	509
EIF2AK3	3.81E-06	1.41E-05	544
RPL27A	2.23E-85	8.29E-84	2213
PIK3C2G	0.00356222	0.00836197	269
DENND1A	2.78E-05	9.20E-05	486
UBE2D1	0.00277177	0.00665759	601
CRYBG3	0.000561124	0.00153027	371
PUM2	2.45E-17	2.00E-16	1192
CYFIP1	8.30E-94	3.54E-92	818
NUP98	5.22E-05	0.000167022	767
PUM1	1.08E-11	6.46E-11	1356
RPL10A	2.68E-155	2.40E-153	2200
ICA1	6.73E-06	2.41E-05	65
SPCS1	2.50E-05	8.32E-05	1327
HMGXB3	2.41E-14	1.69E-13	331
ETFA	7.12E-08	3.17E-07	1051
PPP4R3A	1.31E-09	6.73E-09	838
SETD5	0.000151689	0.000454726	861
INPP4B	2.58E-14	1.80E-13	389
ARL4A	3.57E-07	1.48E-06	757
TXNRD1	3.59E-144	2.85E-142	1356
FABP5	2.65E-09	1.34E-08	60
CIT	5.02E-09	2.48E-08	208
KMT2A	0.000909786	0.00239398	884
NAPEPLD	9.25E-75	2.92E-73	571
KPNA6	9.42E-06	3.31E-05	545
SLC39A6	2.08E-05	7.01E-05	486
CEP120	0.00300095	0.00716454	332
ELF1	1.31E-05	4.51E-05	1694
HMG20B	1.76E-10	9.68E-10	621
CXCL12	8.52E-124	5.58E-122	485
AIFM1	0.000176237	0.000522554	1186
HTRA1	0	0	811
RIC8B	9.54E-06	3.35E-05	481
LOC422051	6.45E-06	2.32E-05	445
P4HB	5.49E-110	3.02E-108	1623
ADD3	1.23E-112	7.02E-111	1222
PIK3C3	0.000413768	0.00115194	366
KDM6A	9.35E-06	3.29E-05	1140
DCAF5	9.83E-05	0.000303018	528
CPAMD8	9.67E-20	8.79E-19	147
LARP1B	0.000117456	0.00035721	514
UBQLN1	2.16E-17	1.77E-16	960
BST1	4.29E-24	4.59E-23	257
COX7A2	1.48E-05	5.08E-05	1966
FGD5	3.97E-10	2.13E-09	111
PLCL1	7.59E-06	2.70E-05	248
SRBD1	0.000232536	0.000676505	422
TMSB4X	0	0	2345
LAPTM4B	4.54E-13	2.96E-12	215
MGST1	1.75E-24	1.89E-23	950
SGK3	4.31E-114	2.51E-112	944
ACAT1	1.56E-05	5.36E-05	1365
LSP1P1	1.20E-57	2.88E-56	1568
LOC425347	6.34E-05	0.000200995	31
VAPB	6.51E-10	3.44E-09	1102
SIK2	2.32E-35	3.49E-34	666
SARNP	0.00394269	0.00918605	933
LY86	0.0012164	0.0031312	1763
LOC776816	4.09E-40	6.94E-39	2250
GPATCH2	3.81E-07	1.58E-06	311
ZDHHC6	3.69E-07	1.54E-06	865
LOC107055115	2.58E-15	1.91E-14	178
PPIA	1.73E-64	4.62E-63	2272
LOC107052897	1.23E-07	5.37E-07	251
SCAI	4.77E-06	1.75E-05	210
NDUFAB1	5.54E-06	2.01E-05	1260
CECR2	1.71E-10	9.40E-10	279
TCF4	2.48E-08	1.15E-07	400
GPT2	5.93E-05	0.000188706	44
RALGAPA2	1.25E-06	4.91E-06	440
RPL22	1.42E-43	2.58E-42	2201
SEPTIN8	7.40E-110	4.05E-108	610
MAPK4	0.00301739	0.00719694	1221
LOC770612	2.05E-42	3.61E-41	2102
NPL	1.32E-33	1.88E-32	338
SGCZ	5.42E-11	3.09E-10	73
INPP5A	1.17E-13	7.87E-13	757
EGFR	2.40E-06	9.12E-06	61
TRNAU1AP	1.39E-72	4.28E-71	1150
LOC428417	3.20E-09	1.60E-08	236
TK2	7.53E-12	4.53E-11	512
CDK5RAP2	1.85E-50	3.91E-49	828
GCDH	9.35E-21	8.84E-20	634
SULT1E1	5.27E-18	4.45E-17	275
MOB1B	3.60E-17	2.92E-16	761
GALNT18	5.84E-06	2.11E-05	177
CAMSAP2	0.000111551	0.000340449	532
H1FX	0.00168185	0.00421913	1081
FAM188B	2.98E-06	1.12E-05	102
CEP170	3.99E-48	8.08E-47	810
COPB2	2.39E-06	9.06E-06	1259
RPL17	1.84E-35	2.77E-34	2235
LOC107050717	4.51E-18	3.82E-17	275
GTF2F2	1.89E-08	8.89E-08	1131
MOSPD2	0.00113433	0.00293694	666
LOC112532682	3.93E-16	3.01E-15	110
COMMD7	0.00023148	0.000673864	1243
NFATC2	1.15E-06	4.52E-06	431
ZFPM1	0.000168739	0.000501537	122
C1orf198	5.92E-25	6.49E-24	336
IGF2BP2	6.12E-05	0.000194455	635
SMARCA5	3.10E-06	1.16E-05	1585
EIF3B	2.59E-29	3.30E-28	1489
PDE6D	6.97E-06	2.49E-05	596
VEGFRKDRL	1.46E-08	6.90E-08	127
VPS35	8.02E-06	2.85E-05	810
SSBP2	0.00028465	0.00081215	217
TACC3	2.26E-07	9.60E-07	1117
SCAMP2	1.04E-06	4.10E-06	424
LOC101748943	5.63E-07	2.29E-06	44
TIAM1	1.44E-31	1.95E-30	726
RPS17	1.23E-109	6.70E-108	2326
IFFO2	9.64E-10	5.03E-09	419
RPL14	3.46E-97	1.57E-95	2289
ABHD6	1.71E-33	2.42E-32	488
RPL30	1.04E-136	7.75E-135	2162
VDAC3	7.39E-05	0.00023159	1171
ACP6	4.77E-05	0.000153475	288
NDEL1	1.33E-06	5.19E-06	623
VPS39	6.87E-11	3.89E-10	421
IL18	1.49E-82	5.27E-81	475
A2ML1	1.59E-08	7.49E-08	213
PCMTD1	5.74E-111	3.20E-109	704
DFNB59	1.00E-04	0.000307427	193
TBC1D22A	2.01E-07	8.59E-07	429
RALB	0.0017009	0.00426287	1101
2024-03-01	3.81E-07	1.58E-06	450
COQ3	2.64E-05	8.77E-05	450
RABGAP1L	4.65E-71	1.41E-69	1281
TCP1	5.66E-15	4.12E-14	1814
FRYL	0.000869671	0.00229583	1014
VPS8	0.0018453	0.00458529	591
SDK1	7.48E-45	1.40E-43	612
SLC39A13	6.95E-16	5.28E-15	599
INTS2	1.62E-08	7.62E-08	797
SETBP1	1.14E-13	7.71E-13	199
TPMT	2.78E-93	1.17E-91	662
RMND1	0.000144855	0.00043611	628
CHMP6	7.90E-05	0.000246866	678
PPP1R15B	7.52E-05	0.000235214	568
EPS15	5.17E-65	1.40E-63	771
ASNS	9.45E-09	4.54E-08	1183
ALG5	0.000258921	0.000744562	286
PLD1	1.03E-07	4.50E-07	290
C2orf49	1.55E-05	5.31E-05	448
SULF2	4.33E-07	1.79E-06	454
PLCD1	0.000214878	0.00062975	211
SMIM8	2.63E-06	9.93E-06	174
LOC427010	2.30E-05	7.69E-05	96
OPNVA	3.16E-17	2.57E-16	138
OSTM1	9.06E-07	3.60E-06	356
PCASP1	0.000812661	0.00215891	262
KANK4	0.000117882	0.000358431	18
DDX27	2.45E-11	1.44E-10	1267
PODXL	3.54E-26	4.00E-25	114
BASP1	1.82E-274	4.12E-272	1715
SPPL2A	3.07E-67	8.73E-66	942
PKD2	1.97E-06	7.56E-06	262
ERO1B	1.53E-08	7.22E-08	587
LINGO2	0.00341221	0.00804548	25
MRPS21	4.80E-24	5.13E-23	1629
RHOH	3.17E-13	2.09E-12	680
SCARF1	0.000367247	0.00102985	448
STYK1	0.000253553	0.00073113	90
PNPLA2	5.52E-06	2.00E-05	199
MSN	6.83E-11	3.86E-10	1969
NBAS	4.08E-05	0.000132146	544
NCBP3	0.00187012	0.0046407	526
TMED10	1.20E-28	1.47E-27	1902
WDR3	5.84E-15	4.24E-14	979
PLXDC2	6.39E-07	2.58E-06	71
SEC61A2	0.000923168	0.00242701	147
PCNX2	0.00358794	0.00841695	87
RPIA	3.90E-69	1.15E-67	1556
LPGAT1	5.96E-05	0.000189585	497
HOXB6	3.85E-55	8.82E-54	349
CDC42	3.09E-37	4.90E-36	1991
ADAMTS1	1.90E-12	1.19E-11	125
ABI3BP	9.38E-100	4.52E-98	347
DNAJC19	5.14E-09	2.53E-08	1205
RPL37A	2.88E-94	1.25E-92	2318
FOXO1	2.30E-16	1.78E-15	520
SRPK2	0.000208625	0.000612525	750
MHCYL	0.000171239	0.000508658	242
FUBP3	6.51E-05	0.000206172	1214
PAPSS2	0.000304656	0.000864065	290
OAF	2.15E-44	3.98E-43	360
ATP5C1	8.90E-19	7.77E-18	1683
DUS1L	9.68E-05	0.000298456	888
SENP5	0.000531372	0.00145318	638
BRD4	7.98E-06	2.84E-05	1454
EHBP1	1.07E-31	1.45E-30	1189
ZFPM2	2.78E-33	3.93E-32	478
ERN2	1.67E-06	6.44E-06	384
NOP56	8.12E-47	1.59E-45	1684
CATSPER4	7.25E-06	2.59E-05	341
NPHP3	0.00264483	0.00638194	48
ZNF711	0.000191709	0.000565573	1022
MYLK	1.97E-14	1.39E-13	226
ANKS1A	1.75E-07	7.50E-07	239
CPSF3	0.00106145	0.00276383	721
CHD5	1.54E-06	5.97E-06	343
NDUFS8	2.09E-05	7.04E-05	1244
PTGS2	8.29E-204	1.18E-201	993
TSPAN18	0.000618533	0.0016707	98
UFL1	5.68E-07	2.31E-06	651
NUP153	1.14E-05	3.97E-05	839
RGS9	1.24E-38	2.02E-37	648
LOC423719	3.16E-148	2.59E-146	1509
AGPAT4	2.92E-16	2.25E-15	477
VRK2	6.88E-11	3.89E-10	668
PHRF1	0.00201861	0.00497052	948
BNIP3	2.16E-07	9.18E-07	507
THNSL2	0.00128501	0.00329166	127
MRPL43	1.79E-13	1.20E-12	1373
LMO7	0.00060934	0.00164793	31
ATP1B1	2.53E-82	8.93E-81	1249
ACAD9	3.22E-09	1.61E-08	1372
APCDD1	0.00136485	0.00347617	58
OTUD4	5.87E-05	0.000187054	460
RACK1	5.03E-100	2.44E-98	2259
SLC35E3	1.95E-19	1.75E-18	908
SKP2	1.58E-06	6.12E-06	751
P2RY14	0.000388328	0.00108565	18
TSPAN14	0.000194542	0.000573355	570
CDK6	6.72E-115	3.96E-113	1200
SLC45A1	5.70E-08	2.56E-07	408
YY2	0.000480522	0.00132274	898
ZNF821	0.000302403	0.000858505	639
PRRC1	7.20E-07	2.89E-06	463
TRIP4	6.30E-05	0.000199863	552
KIFC2	4.70E-13	3.07E-12	237
RPL35	1.97E-77	6.38E-76	2223
AUP1	2.04E-13	1.36E-12	841
MRPL30	0.000118175	0.000359246	1025
MAN1B1	0.000328671	0.000928766	1037
ALDH2	4.74E-56	1.10E-54	789
HSPD1	1.51E-14	1.07E-13	1789
RPL31	9.39E-149	7.75E-147	2166
CAMK2G	6.82E-48	1.37E-46	1192
GAPVD1	6.44E-09	3.14E-08	679
SYNJ1	3.37E-11	1.95E-10	299
GCC2	7.13E-08	3.17E-07	613
RPL13	1.79E-115	1.07E-113	2310
MMD	1.73E-10	9.55E-10	706
LAPTM4A	2.31E-237	4.34E-235	1627
SAP18	4.95E-08	2.24E-07	1790
GDI1	0.000226282	0.00065975	1750
TBC1D12	4.03E-05	0.000130734	376
PDHB	2.58E-05	8.57E-05	1149
ZDHHC23	1.17E-48	2.39E-47	441
FCRL4	6.61E-11	3.74E-10	86
DEK	2.93E-16	2.25E-15	1522
LOC121106742	0.0031957	0.00759633	23
TAF1A	0.00192809	0.00476762	287
STX12	0.00039762	0.00111057	638
RNF214	0.000572753	0.00155909	392
MRPL12	1.86E-20	1.74E-19	1729
LPCAT1	9.85E-31	1.31E-29	660
MESDC1	5.16E-09	2.54E-08	752
LOC107054342	0.000508619	0.00139485	138
SPOPL	3.61E-12	2.22E-11	843
FGGY	3.50E-07	1.46E-06	967
SLC2A11L5	9.31E-06	3.28E-05	130
ASAH1	0.00183846	0.00457062	811
KIF1BP	1.43E-175	1.58E-173	1526
BAZ1A	4.05E-13	2.65E-12	1227
DSE	2.17E-47	4.29E-46	414
TBC1D1	2.22E-20	2.06E-19	683
GRHL2	0.000482008	0.00132609	34
SULT1B	0.000113303	0.000345437	178
EPHA3	0.000535769	0.00146466	30
PRKCD	1.51E-06	5.84E-06	356
DDIT4	5.45E-26	6.15E-25	1065
LMO1	0.000153119	0.000458546	81
BAZ2B	5.24E-20	4.83E-19	565
BCL2L15	8.54E-17	6.79E-16	160
MCRIP2	4.61E-15	3.37E-14	454
FKBP14	3.56E-07	1.48E-06	372
BTG1	1.62E-70	4.89E-69	1778
ADH4	0.000273788	0.000784243	1392
IGFBP7	4.37E-256	9.04E-254	627
AGPS	1.05E-07	4.62E-07	951
INTS13	5.32E-06	1.94E-05	1418
PDE5A	0.000574807	0.0015641	51
MFF	5.55E-06	2.01E-05	950
FBRSL1	4.42E-15	3.24E-14	1029
DGCR2	0.0014857	0.00376048	573
RLIM	2.20E-06	8.40E-06	706
MND1	4.84E-11	2.77E-10	548
COPS2	6.80E-05	0.000214386	809
MT3	1.84E-10	1.01E-09	134
MLF2	0.000105028	0.000321745	1449
SMYD3	6.38E-08	2.86E-07	372
ZC3H11A	5.49E-17	4.42E-16	1063
TGOLN2	1.57E-45	2.97E-44	1111
VPS13C	1.08E-26	1.24E-25	704
ASCC3	2.54E-05	8.47E-05	471
PRKCDBP	0.000644616	0.0017354	111
CSTF3	5.06E-06	1.85E-05	857
UQCR11	4.58E-27	5.33E-26	1543
MGAT3	3.74E-16	2.87E-15	523
ULK1	7.88E-05	0.000246435	287
LOC107053519	2.24E-18	1.92E-17	387
CYTH4	2.34E-33	3.31E-32	476
ACP1	0.000484362	0.00133231	938
CYR61	4.34E-36	6.67E-35	321
RRAS	3.16E-11	1.83E-10	674
AHI1	4.59E-07	1.89E-06	477
DYNC1I2	6.83E-12	4.13E-11	1013
NADK	7.06E-196	9.26E-194	1231
GINM1	5.54E-39	9.14E-38	503
CCDC186	5.88E-17	4.73E-16	311
NCKAP5	2.99E-06	1.12E-05	87
ITSN2	2.92E-118	1.80E-116	1036
COX6A1	1.05E-13	7.06E-13	1946
HIPK2	1.27E-54	2.87E-53	641
SLC7A7	1.36E-12	8.65E-12	79
IRAK2	7.06E-17	5.65E-16	1322
SDAD1	4.92E-06	1.80E-05	860
INVS	2.24E-08	1.05E-07	264
LAMA4	0.00415916	0.00964297	106
CEP170B	2.50E-25	2.76E-24	411
ZFAND3	2.08E-05	7.02E-05	525
MTX2	8.11E-05	0.000252802	688
PIM1	2.73E-05	9.03E-05	377
PRRG1	0.00407478	0.00947277	65
KIAA1109	2.22E-76	7.11E-75	764
GPN3	9.29E-29	1.15E-27	1141
SLC22A5	0.000412351	0.00114822	139
MOCS1	1.78E-06	6.84E-06	98
PRPF38A	6.61E-08	2.95E-07	686
PCSK6	4.38E-06	1.61E-05	176
C2orf42	0.000521101	0.00142722	224
RBPMS	1.79E-26	2.05E-25	489
GRIK4	5.60E-17	4.51E-16	124
SOD2	0.00080462	0.00213871	1167
PRKCB	1.56E-55	3.60E-54	938
EFNA5	3.97E-05	0.000128846	110
ADORA2A	0.000152427	0.000456659	213
FAM49A	0	0	1634
HEXIM1	1.13E-11	6.74E-11	1788
FGF18	4.47E-07	1.84E-06	129
NUCB2	5.85E-21	5.58E-20	1043
EIF2S2	0.000137229	0.000414424	1690
CCT5	0.000448936	0.00124185	1678
DNAJC1	7.50E-09	3.63E-08	1170
CZH18ORF25	1.69E-26	1.94E-25	482
ERICH1	1.67E-07	7.19E-07	226
LOC121109222	2.24E-06	8.52E-06	29
EFCAB14	6.29E-06	2.26E-05	464
MAST4	2.84E-14	1.98E-13	437
WDR43	1.47E-09	7.51E-09	1210
KAT14	7.65E-11	4.30E-10	653
SLC15A1	3.49E-11	2.01E-10	51
BRWD3	2.64E-37	4.19E-36	664
RASSF8	0.000813256	0.0021601	52
BCAS2	1.78E-27	2.11E-26	1251
CNOT7	6.36E-06	2.29E-05	1303
DUT	6.25E-11	3.54E-10	1179
COL19A1	0.00102141	0.00266762	30
LOC121113247	2.10E-08	9.79E-08	1940
LCLAT1	2.29E-11	1.34E-10	1269
CSPG4B	5.11E-20	4.71E-19	215
EXOC1	1.92E-12	1.21E-11	332
PDE3B	7.56E-24	8.01E-23	1253
UBE2F	0.000225985	0.00065912	1119
PIK3CB	9.13E-43	1.62E-41	809
TGFBR2	5.20E-17	4.19E-16	739
RIOK3	0.000270309	0.000775032	951
CCDC93	8.87E-11	4.97E-10	736
ATF7IP	1.77E-17	1.46E-16	635
KANSL1	0.000329814	0.000931819	415
UBR1	1.93E-06	7.42E-06	533
CEP85L	0.000756258	0.002016	1353
DNAJA4	2.82E-31	3.80E-30	1601
UBL3	6.05E-135	4.42E-133	1420
TRPV2	2.50E-23	2.60E-22	530
USP7	0.000332253	0.000937626	1044
SMG1	0.00187276	0.00464646	666
MTMR10	1.26E-138	9.57E-137	834
PRKCE	4.72E-05	0.000151761	500
RBBP8	2.84E-17	2.31E-16	463
TSHZ2	1.22E-09	6.30E-09	115
COQ8A	1.94E-11	1.14E-10	808
FRAS1	1.64E-08	7.71E-08	283
LOC107049991	0.000684	0.00183537	195
C9orf78	2.49E-11	1.46E-10	771
RPS20	2.32E-83	8.38E-82	2325
SEPTIN7	6.80E-27	7.86E-26	1800
IFT81	0.000298479	0.000847855	225
NIPSNAP2	2.86E-05	9.45E-05	1304
RPS3	1.74E-95	7.68E-94	2319
CYTB	0.00278761	0.00669345	2285
CBL	3.16E-22	3.17E-21	698
RPS8	1.05E-69	3.11E-68	2350
GALNT1	0.000315166	0.000892149	1410
MAFK	3.25E-30	4.24E-29	1183
RUFY3	1.09E-15	8.15E-15	785
MDH1	1.14E-14	8.13E-14	1532
TDRD3	7.53E-07	3.01E-06	825
SMAP2	7.17E-163	7.02E-161	1519
PPID	7.01E-18	5.88E-17	1342
NCAPD3	4.25E-10	2.27E-09	277
ARAP2	0.00322509	0.00765626	610
COL5A1	4.19E-08	1.91E-07	158
GNB1	9.43E-10	4.92E-09	1683
ATAD2	0.00107206	0.0027885	652
TMEM106C	1.66E-36	2.56E-35	234
SLC30A5	0.0024998	0.00605987	852
COL13A1	0.000967102	0.00253435	28
ANTXR2	2.29E-32	3.19E-31	387
EPB41L1	2.60E-11	1.52E-10	155
DPP10	9.10E-20	8.30E-19	318
KPNA1	0.000148705	0.000446425	666
CHKA	1.68E-48	3.42E-47	1055
LOC112532582	0.000398159	0.00111186	36
RPL35A	2.57E-99	1.22E-97	2278
H3F3C	2.09E-29	2.67E-28	2095
ABLIM2	9.10E-10	4.76E-09	74
ALCAM	2.62E-34	3.82E-33	1001
TMEM185B	3.34E-35	5.01E-34	828
CREB3L2	2.81E-109	1.52E-107	790
ETS1	5.94E-14	4.06E-13	782
LOC121106796	3.89E-07	1.61E-06	67
ASXL2	2.61E-21	2.53E-20	731
VAC14	1.14E-82	4.06E-81	874
TET3	1.07E-14	7.69E-14	691
BCAS3	6.71E-08	2.99E-07	467
WWC3	1.35E-10	7.49E-10	337
ADAMTS3	4.95E-07	2.03E-06	277
GLTSCR2	0.00360412	0.0084522	1519
OXA1L	7.98E-13	5.14E-12	1117
ANP32B	0.000788668	0.00209783	2091
HEG1	5.62E-13	3.65E-12	95
CSMD2	5.50E-13	3.57E-12	104
ZDHHC17	1.28E-08	6.08E-08	689
TOR1AIP1	8.68E-47	1.70E-45	1077
FH	2.87E-05	9.47E-05	912
CDC14A	3.70E-08	1.69E-07	441
CAAP1	7.24E-13	4.67E-12	554
CA5A	5.75E-17	4.63E-16	460
LAPTM5	1.33E-220	2.33E-218	1547
HS6ST2	3.30E-140	2.55E-138	503
ZBTB7C	5.01E-18	4.24E-17	129
DENND5A	8.34E-17	6.65E-16	720
TBC1D8	2.66E-186	3.22E-184	599
SEC63	3.35E-23	3.48E-22	1259
LOC101751709	4.01E-13	2.63E-12	1202
CYP2J22	4.51E-39	7.45E-38	621
CCT6A	7.95E-09	3.84E-08	1586
FKBP9	6.80E-15	4.91E-14	325
MSH4	2.62E-16	2.03E-15	512
TPR	1.02E-10	5.68E-10	1177
KIN	1.86E-05	6.33E-05	259
POLR1C	5.86E-15	4.25E-14	954
VRK3	7.94E-21	7.53E-20	782
CDKN1B	7.70E-11	4.33E-10	792
GSTT1L	1.98E-10	1.08E-09	223
TBCE	7.84E-06	2.79E-05	574
PKLR	5.00E-101	2.51E-99	1983
AP3S2	3.98E-22	3.97E-21	1172
ORC6	0.00247395	0.00600314	515
MGARP	6.04E-05	0.000192099	1570
NR2C2	0.000284167	0.000810966	592
MPP5	2.02E-07	8.60E-07	184
ADSL	2.37E-17	1.94E-16	1066
ARHGAP21	2.55E-07	1.08E-06	169
OTUD6A	6.31E-29	7.90E-28	1068
SYT1	0.000549034	0.00149925	52
TBCA	7.90E-05	0.000246866	1257
COL4A5	7.33E-75	2.32E-73	324
TALDO1	1.93E-66	5.38E-65	1733
SORCS1	0.00173803	0.00434227	694
USH2A	0.00188865	0.00468034	37
SLC25A24	1.42E-53	3.16E-52	1056
FZD1	0.00349927	0.00822865	122
TP53BP2	8.12E-06	2.88E-05	598
IFIH1	4.48E-07	1.84E-06	203
ZNF593	4.95E-21	4.74E-20	1730
MPPED1	3.05E-10	1.65E-09	372
UGGT1	8.28E-08	3.66E-07	805
COX6C	2.19E-21	2.13E-20	1995
NCOA3	1.96E-25	2.17E-24	601
KIF2A	0.000988772	0.00258744	873
USP33	4.42E-19	3.90E-18	547
SLC4A4	0.000384341	0.00107512	163
PER2	0.000579312	0.00157519	657
GPER1	1.88E-05	6.39E-05	173
AMD1	4.35E-06	1.60E-05	906
RPN1	3.29E-12	2.03E-11	1669
WDR33	0.00114139	0.00295312	851
SSB	8.45E-23	8.64E-22	1572
ADAM9	9.94E-34	1.43E-32	384
LOC107057295	5.32E-05	0.000170252	860
SVIL	4.11E-09	2.04E-08	854
UVSSA	0.000740787	0.00197835	637
KMT5A	5.10E-31	6.79E-30	346
C5H14orf4	9.69E-07	3.84E-06	867
COX14	2.40E-09	1.21E-08	1103
ATP5B	1.96E-28	2.40E-27	1924
PTPN4	1.74E-33	2.46E-32	738
TUB	1.93E-05	6.54E-05	108
MLF1	0.000100176	0.00030804	221
CDC123	9.16E-05	0.000283501	433
LOC418465	0.00333894	0.00789973	12
FNTA	0.000476362	0.00131281	356
ADAT2	0.000285662	0.0008146	591
SPINK2	0	0	783
RPL19	9.66E-88	3.70E-86	2295
LOC124417424	8.62E-05	0.000267631	62
CCNG1	8.22E-21	7.78E-20	671
CACNA1H	9.28E-48	1.85E-46	238
LLPH	4.84E-09	2.39E-08	1447
SMIM4	1.61E-07	6.95E-07	1057
LOC107053353	8.18E-89	3.20E-87	1871
HNRNPAB	7.50E-12	4.52E-11	2027
MRAS	2.15E-49	4.47E-48	468
RNF139	6.22E-06	2.24E-05	600
CDK19	3.20E-22	3.21E-21	532
DKK2	0.000241043	0.000697937	28
TRAPPC8	4.13E-07	1.71E-06	502
CNBP	1.02E-08	4.89E-08	2034
NINJ1	2.78E-59	6.88E-58	582
CFAP410	5.03E-06	1.84E-05	651
CCDC32	9.76E-11	5.46E-10	589
UBR5	1.96E-08	9.18E-08	1002
SLC16A9	0.000902098	0.0023763	181
DNAJC30	0.00167246	0.00420133	432
ELOVL5	1.85E-14	1.30E-13	984
WDR44	5.74E-06	2.08E-05	446
DMTF1	4.50E-09	2.23E-08	300
GPATCH8	1.40E-05	4.83E-05	484
RPL23A	2.03E-130	1.41E-128	2009
PTPRN2	0.00132767	0.00338853	80
PES1	3.32E-06	1.24E-05	1532
FAM32A	0.00390731	0.00911229	1395
NCOR2	3.96E-48	8.03E-47	1566
HN1	2.91E-23	3.02E-22	1109
ZZEF1	6.44E-14	4.39E-13	528
LOC112530378	0.00282932	0.00678915	61
CHGB	8.72E-05	0.000270632	341
SNCG	0.00080573	0.00214127	76
COX2	5.42E-22	5.38E-21	2326
PXK	0.000630044	0.00169804	308
STARD8	1.10E-15	8.24E-15	566
ARHGAP22	6.75278918523104e-314	2.02349395115804e-311	594
POLR2E	1.00E-08	4.80E-08	1246
PTMA	6.50E-46	1.25E-44	2294
DELE	1.05E-08	5.04E-08	535
RCSD1	4.60E-09	2.27E-08	766
LOC101749173	6.71E-05	0.000211603	65
SLC25A42	5.49E-06	1.99E-05	85
IMPA2	9.94E-55	2.26E-53	606
PTPRC	1.50E-184	1.77E-182	1806
MBP	1.14E-56	2.72E-55	1135
ACTB	0	0	2404
XYLB	3.53E-05	0.000115145	400
ATP6V1C1	2.07E-28	2.54E-27	667
THSD7B	2.37E-06	9.00E-06	359
ARFGEF3	9.76E-05	0.000300913	106
[truncated: 4,359 more rows]
