# Supplementary material for: Cross-species comparison of single-cell landscapes reveals conservation and innovation in chicken immune systems
Source: Research Square preprint supplement (doi:10.21203/rs.3.rs-6164369/v1), 2025-03-20
Supplement: Supplementary file 2 [file 45eedc683d44eb23b68f30bf.xlsx]

## Sheet: Sheet1
Supplementary Table 5: Evolutionary and functional classes of genes(mononuclear phagocyte and lymphocyte).
Evo type: evolutionary scenario gene falls into, with NA for genes not expressed; Gene class: type of gene (CD molecules, Chemokines and recptors, etc); conserved_Num: number of homologous clusters gene where gene is expressed in both chicken and human; Human_Spec_Num: number of homologous clusters where the gene is only expressed in human; Chicken_Spec_Num, above for human.)
	Evo_Type	Gene_Class	Conserved_Num	Human_Spec_Num	Chicken_Spec_Num
SAMD11	3	0	0	1	3
NOC2L	1	0	0	6	0
KLHL17	NA	0	0	0	0
PLEKHN1	NA	0	0	0	0
HES4	2	0	2	1	8
AGRN	NA	0	0	0	0
RNF223	NA	0	0	0	0
C1orf159	NA	0	0	0	0
TTLL10	NA	0	0	0	0
SDF4	2	0	17	1	4
B3GALT6	NA	0	0	0	0
C1QTNF12	NA	0	0	0	0
UBE2J2	2	0	4	1	13
SCNN1D	NA	0	0	0	0
ACAP3	NA	0	0	0	0
PUSL1	NA	0	0	0	0
INTS11	1	0	0	9	0
CPTP	NA	0	0	0	0
TAS1R3	NA	0	0	0	0
DVL1	NA	0	0	0	0
MXRA8	NA	0	0	0	0
CCNL2	2	0	16	6	0
MRPL20	2	0	6	16	0
VWA1	1	0	0	1	0
ATAD3A	1	0	0	1	0
TMEM240	NA	0	0	0	0
MIB2	1	0	0	3	0
MMP23B	NA	0	0	0	0
SLC35E2B	1	0	0	0	3
NADK	2	0	6	1	12
GNB1	0	0	22	0	0
CFAP74	NA	0	0	0	0
GABRD	NA	0	0	0	0
PRKCZ	NA	0	0	0	0
SKI	2	0	1	11	0
RER1	2	0	5	14	1
PEX10	NA	0	0	0	0
PLCH2	NA	0	0	0	0
PANK4	NA	0	0	0	0
MMEL1	NA	0	0	0	0
TTC34	NA	0	0	0	0
PRDM16	1	0	0	0	1
ARHGEF16	NA	0	0	0	0
MEGF6	NA	0	0	0	0
TPRG1L	1	0	0	0	2
WRAP73	NA	0	0	0	0
TP73	NA	0	0	0	0
CCDC27	NA	0	0	0	0
LRRC47	1	0	0	2	0
CEP104	NA	0	0	0	0
DFFB	NA	0	0	0	0
C1orf174	1	0	0	1	0
AJAP1	NA	0	0	0	0
NPHP4	NA	0	0	0	0
KCNAB2	1	0	0	12	0
CHD5	NA	0	0	0	0
RNF207	1	0	0	1	0
ICMT	NA	0	0	0	0
GPR153	NA	0	0	0	0
ACOT7	3	0	0	2	7
ESPN	NA	0	0	0	0
TNFRSF25	2	0	2	5	0
PLEKHG5	NA	0	0	0	0
NOL9	1	0	0	0	19
TAS1R1	NA	0	0	0	0
ZBTB48	NA	0	0	0	0
KLHL21	NA	0	0	0	0
PHF13	NA	0	0	0	0
DNAJC11	NA	0	0	0	0
CAMTA1	2	0	5	8	0
VAMP3	2	0	1	3	0
PER3	1	0	0	0	1
UTS2	NA	0	0	0	0
TNFRSF9	2	0	1	9	0
PARK7	0	0	22	0	0
ERRFI1	1	0	0	0	13
SLC45A1	NA	0	0	0	0
RERE	2	0	6	6	3
ENO1	0	0	22	0	0
CA6	NA	0	0	0	0
SLC2A5	NA	0	0	0	0
GPR157	3	0	0	1	1
H6PD	1	0	0	1	0
SPSB1	1	0	0	0	4
SLC25A33	1	0	0	2	0
PIK3CD	3	0	0	11	1
CLSTN1	1	0	0	4	0
CTNNBIP1	1	0	0	1	0
LZIC	1	0	0	3	0
RBP7	1	0	0	2	0
UBE4B	NA	0	0	0	0
KIF1B	3	0	0	3	3
PGD	2	0	5	3	0
CENPS	1	0	0	0	1
DFFA	1	0	0	1	0
PEX14	NA	0	0	0	0
TARDBP	2	0	6	11	2
MASP2	NA	0	0	0	0
SRM	2	0	2	8	0
EXOSC10	1	0	0	2	0
MTOR	NA	0	0	0	0
ANGPTL7	NA	0	0	0	0
DISP3	1	0	0	0	11
FBXO2	NA	0	0	0	0
FBXO44	1	0	0	1	0
MAD2L2	1	0	0	5	0
DRAXIN	NA	0	0	0	0
AGTRAP	1	0	0	4	0
MTHFR	1	0	0	2	0
CLCN6	NA	0	0	0	0
NPPB	NA	0	0	0	0
KIAA2013	1	0	0	1	0
PLOD1	1	0	0	0	1
MFN2	NA	0	0	0	0
MIIP	1	0	0	4	0
TNFRSF8	1	0	0	0	2
VPS13D	1	0	0	0	18
DHRS3	1	0	0	5	0
LRRC38	NA	0	0	0	0
PRDM2	2	0	4	16	1
KAZN	NA	0	0	0	0
TMEM51	1	0	0	1	0
FHAD1	NA	0	0	0	0
EFHD2	2	0	5	14	0
CTRC	NA	0	0	0	0
CASP9	NA	0	0	0	0
DNAJC16	NA	0	0	0	0
AGMAT	NA	0	0	0	0
PLEKHM2	2	0	1	2	0
SLC25A34	NA	0	0	0	0
TMEM82	NA	0	0	0	0
FBLIM1	NA	0	0	0	0
SPEN	2	0	20	2	0
ZBTB17	NA	0	0	0	0
HSPB7	NA	0	0	0	0
EPHA2	1	0	0	1	0
CPLANE2	NA	0	0	0	0
FBXO42	NA	0	0	0	0
SZRD1	2	0	8	12	1
NECAP2	2	0	6	9	3
CROCC	NA	0	0	0	0
MFAP2	NA	0	0	0	0
ATP13A2	3	0	0	1	5
SDHB	2	0	14	5	2
PADI2	NA	0	0	0	0
RCC2	2	0	2	3	9
ARHGEF10L	NA	0	0	0	0
KLHDC7A	NA	0	0	0	0
PAX7	NA	0	0	0	0
ALDH4A1	NA	0	0	0	0
IFFO2	1	0	0	7	0
UBR4	1	0	0	9	0
EMC1	NA	0	0	0	0
MRTO4	2	0	2	12	0
SLC66A1	1	0	0	0	4
CAPZB	0	0	22	0	0
MICOS10	2	0	19	1	2
NBL1	3	0	0	3	2
HTR6	NA	0	0	0	0
TMCO4	NA	0	0	0	0
OTUD3	NA	0	0	0	0
PLA2G2E	NA	0	0	0	0
PLA2G2A	NA	0	0	0	0
UBXN10	NA	0	0	0	0
VWA5B1	NA	0	0	0	0
CAMK2N1	NA	0	0	0	0
MUL1	NA	0	0	0	0
FAM43B	NA	0	0	0	0
CDA	1	0	0	2	0
PINK1	1	0	0	0	1
DDOST	2	0	5	17	0
SH2D5	NA	0	0	0	0
HP1BP3	2	0	7	15	0
EIF4G3	2	0	7	1	14
ECE1	1	0	0	3	0
ALPL	NA	0	0	0	0
RAP1GAP	NA	0	0	0	0
USP48	1	0	0	14	0
HSPG2	NA	0	0	0	0
CDC42	0	0	22	0	0
WNT4	NA	0	0	0	0
ZBTB40	NA	0	0	0	0
EPHA8	NA	0	0	0	0
C1QA	2	0	3	1	0
C1QC	2	0	2	2	0
C1QB	2	0	2	1	1
EPHB2	NA	0	0	0	0
LACTBL1	NA	0	0	0	0
KDM1A	1	0	0	2	0
LUZP1	1	0	0	3	0
HNRNPR	0	0	22	0	0
TCEA3	NA	0	0	0	0
ASAP3	NA	0	0	0	0
E2F2	1	0	0	1	0
ID3	2	0	2	6	12
PITHD1	2	0	4	15	1
LYPLA2	2	0	1	4	0
GALE	NA	0	0	0	0
HMGCL	1	0	0	0	6
FUCA1	3	0	0	2	3
CNR2	1	0	0	2	0
PNRC2	2	0	15	7	0
SRSF10	0	0	22	0	0
MYOM3	NA	0	0	0	0
IL22RA1	NA	0	0	0	0
GRHL3	NA	0	0	0	0
NIPAL3	NA	0	0	0	0
RCAN3	1	0	0	8	0
SRRM1	0	0	22	0	0
CLIC4	1	0	0	7	0
RUNX3	2	0	15	7	0
SYF2	2	0	21	1	0
RSRP1	2	0	21	1	0
TMEM50A	2	0	10	12	0
MACO1	2	0	3	17	0
LDLRAP1	1	0	0	6	0
MAN1C1	1	0	0	0	2
MTFR1L	1	0	0	0	1
PAQR7	1	0	0	0	3
STMN1	2	0	9	2	9
PAFAH2	NA	0	0	0	0
SLC30A2	NA	0	0	0	0
TRIM63	NA	0	0	0	0
PDIK1L	NA	0	0	0	0
FAM110D	NA	0	0	0	0
C1orf232	NA	0	0	0	0
ZNF593	2	0	7	15	0
CNKSR1	NA	0	0	0	0
CEP85	NA	0	0	0	0
SH3BGRL3	0	0	22	0	0
UBXN11	1	0	0	3	0
LIN28A	NA	0	0	0	0
DHDDS	1	0	0	1	0
RPS6KA1	2	0	4	4	13
ARID1A	2	0	11	11	0
PIGV	NA	0	0	0	0
ZDHHC18	3	0	0	2	2
SFN	NA	0	0	0	0
GPN2	1	0	0	0	1
GPATCH3	NA	0	0	0	0
NUDC	2	0	8	14	0
NR0B2	NA	0	0	0	0
KDF1	NA	0	0	0	0
TRNP1	NA	0	0	0	0
TENT5B	NA	0	0	0	0
SLC9A1	NA	0	0	0	0
WDTC1	NA	0	0	0	0
TMEM222	NA	0	0	0	0
SYTL1	2	0	3	8	2
MAP3K6	NA	0	0	0	0
WASF2	2	0	18	4	0
AHDC1	NA	0	0	0	0
FGR	2	0	1	5	1
FAM76A	NA	0	0	0	0
STX12	2	0	3	4	1
PPP1R8	NA	0	0	0	0
RPA2	2	0	2	11	0
SMPDL3B	NA	0	0	0	0
XKR8	NA	0	0	0	0
EYA3	1	0	0	1	0
PTAFR	2	0	2	2	0
DNAJC8	2	0	18	4	0
SESN2	NA	0	0	0	0
MED18	NA	0	0	0	0
PHACTR4	1	0	0	2	0
RCC1	0	0	2	0	0
TRNAU1AP	2	0	3	11	0
TAF12	1	0	0	7	0
GMEB1	NA	0	0	0	0
YTHDF2	1	0	0	22	0
OPRD1	NA	0	0	0	0
EPB41	2	0	5	13	1
TMEM200B	NA	0	0	0	0
SRSF4	1	0	0	22	0
MECR	1	0	0	0	4
PTPRU	NA	0	0	0	0
MATN1	NA	0	0	0	0
LAPTM5	0	0	22	0	0
SDC3	NA	0	0	0	0
PUM1	2	0	20	2	0
NKAIN1	NA	0	0	0	0
SNRNP40	2	0	1	8	0
ZCCHC17	1	0	0	4	0
FABP3	1	0	0	0	1
SERINC2	NA	0	0	0	0
TINAGL1	NA	0	0	0	0
PEF1	2	0	4	2	2
COL16A1	NA	0	0	0	0
ADGRB2	NA	0	0	0	0
PTP4A2	0	0	22	0	0
KHDRBS1	2	0	10	12	0
TMEM39B	NA	0	0	0	0
KPNA6	2	0	1	2	4
TXLNA	2	0	1	3	0
CCDC28B	1	0	0	2	0
IQCC	NA	0	0	0	0
DCDC2B	NA	0	0	0	0
TMEM234	NA	0	0	0	0
EIF3I	2	0	21	1	0
FAM167B	NA	0	0	0	0
LCK	1	0	0	12	0
HDAC1	2	0	15	6	0
MARCKSL1	2	0	11	3	5
TSSK3	NA	0	0	0	0
BSDC1	1	0	0	8	0
ZBTB8A	NA	0	0	0	0
ZBTB8OS	1	0	0	10	0
RBBP4	2	0	13	9	0
SYNC	1	0	0	2	0
KIAA1522	NA	0	0	0	0
FNDC5	NA	0	0	0	0
HPCA	NA	0	0	0	0
RNF19B	2	0	1	2	5
AK2	2	0	5	9	0
AZIN2	NA	0	0	0	0
TRIM62	NA	0	0	0	0
ZNF362	NA	0	0	0	0
PHC2	1	0	0	3	0
CSMD2	NA	0	0	0	0
C1orf94	NA	0	0	0	0
GJB5	NA	0	0	0	0
GJB3	NA	0	0	0	0
GJA4	1	0	0	1	0
DLGAP3	NA	0	0	0	0
SFPQ	0	0	22	0	0
ZMYM4	NA	0	0	0	0
KIAA0319L	3	0	0	1	3
NCDN	NA	0	0	0	0
TFAP2E	NA	0	0	0	0
PSMB2	2	0	18	1	2
C1orf216	NA	0	0	0	0
CLSPN	1	0	0	2	0
AGO4	3	0	0	1	8
AGO1	NA	0	0	0	0
AGO3	2	0	1	1	17
TEKT2	NA	0	0	0	0
COL8A2	NA	0	0	0	0
TRAPPC3	2	0	1	11	0
MAP7D1	2	0	1	15	0
THRAP3	0	0	22	0	0
EVA1B	NA	0	0	0	0
STK40	3	0	0	2	2
LSM10	1	0	0	16	0
OSCP1	NA	0	0	0	0
MRPS15	2	0	8	9	1
CSF3R	2	0	1	2	0
GRIK3	NA	0	0	0	0
ZC3H12A	2	0	10	11	0
MEAF6	2	0	16	5	0
SNIP1	NA	0	0	0	0
DNALI1	NA	0	0	0	0
GNL2	3	0	0	2	4
RSPO1	NA	0	0	0	0
MANEAL	NA	0	0	0	0
YRDC	2	0	1	1	0
MTF1	1	0	0	0	2
INPP5B	1	0	0	0	4
SF3A3	2	0	6	6	6
FHL3	1	0	0	1	0
UTP11	1	0	0	1	0
RRAGC	1	0	0	3	0
MYCBP	2	0	7	7	0
GJA9	NA	0	0	0	0
NDUFS5	2	0	18	4	0
MACF1	2	0	15	5	2
PABPC4	1	0	0	19	0
HEYL	NA	0	0	0	0
NT5C1A	NA	0	0	0	0
HPCAL4	NA	0	0	0	0
PPIE	2	0	3	2	0
TRIT1	NA	0	0	0	0
MYCL	1	0	0	2	0
MFSD2A	1	0	0	0	5
CAP1	0	0	22	0	0
PPT1	2	0	5	4	3
RLF	2	0	9	4	4
ZMPSTE24	2	0	1	1	12
COL9A2	NA	0	0	0	0
SMAP2	2	0	15	5	2
RIMS3	NA	0	0	0	0
NFYC	2	0	4	3	5
KCNQ4	NA	0	0	0	0
CITED4	2	0	1	4	0
CTPS1	0	0	2	0	0
SCMH1	NA	0	0	0	0
FOXO6	NA	0	0	0	0
EDN2	NA	0	0	0	0
HIVEP3	1	0	0	0	18
GUCA2B	NA	0	0	0	0
ZMYND12	NA	0	0	0	0
PPCS	2	0	3	19	0
PPIH	2	0	4	5	1
YBX1	0	0	22	0	0
CLDN19	NA	0	0	0	0
P3H1	2	0	1	1	0
C1orf50	NA	0	0	0	0
SVBP	2	0	6	16	0
SLC2A1	1	0	0	1	0
EBNA1BP2	2	0	2	1	0
CFAP57	NA	0	0	0	0
TMEM125	NA	0	0	0	0
C1orf210	NA	0	0	0	0
TIE1	NA	0	0	0	0
MPL	NA	0	0	0	0
CDC20	0	0	2	0	0
ELOVL1	2	0	3	4	0
MED8	1	0	0	3	0
SZT2	NA	0	0	0	0
HYI	1	0	0	3	0
PTPRF	1	0	0	1	0
KDM4A	NA	0	0	0	0
ST3GAL3	NA	0	0	0	0
ARTN	NA	0	0	0	0
IPO13	NA	0	0	0	0
DPH2	NA	0	0	0	0
ATP6V0B	2	0	9	12	0
B4GALT2	NA	0	0	0	0
SLC6A9	NA	0	0	0	0
DMAP1	1	0	0	1	0
ERI3	1	0	0	1	0
TMEM53	NA	0	0	0	0
ARMH1	1	0	0	2	0
KIF2C	0	0	1	0	0
RPS8	2	0	21	1	0
BEST4	NA	0	0	0	0
PLK3	2	0	7	5	7
BTBD19	NA	0	0	0	0
PTCH2	1	0	0	1	0
EIF2B3	0	0	1	0	0
HECTD3	NA	0	0	0	0
UROD	1	0	0	3	0
ZSWIM5	1	0	0	0	3
HPDL	NA	0	0	0	0
MUTYH	NA	0	0	0	0
TOE1	NA	0	0	0	0
TESK2	NA	0	0	0	0
MMACHC	NA	0	0	0	0
PRDX1	2	0	20	2	0
AKR1A1	2	0	2	10	0
NASP	2	0	3	17	0
GPBP1L1	2	0	14	1	6
TMEM69	NA	0	0	0	0
IPP	NA	0	0	0	0
PIK3R3	NA	0	0	0	0
TSPAN1	NA	0	0	0	0
POMGNT1	NA	0	0	0	0
LURAP1	NA	0	0	0	0
RAD54L	NA	0	0	0	0
LRRC41	1	0	0	1	0
NSUN4	NA	0	0	0	0
DMBX1	NA	0	0	0	0
MOB3C	1	0	0	0	4
ATPAF1	1	0	0	2	0
EFCAB14	2	0	1	17	0
PDZK1IP1	NA	0	0	0	0
TAL1	NA	0	0	0	0
STIL	NA	0	0	0	0
TRABD2B	NA	0	0	0	0
SLC5A9	NA	0	0	0	0
SPATA6	NA	0	0	0	0
AGBL4	NA	0	0	0	0
BEND5	1	0	0	0	1
ELAVL4	NA	0	0	0	0
DMRTA2	NA	0	0	0	0
FAF1	3	0	0	3	1
CDKN2C	3	0	0	2	1
TTC39A	1	0	0	0	3
EPS15	2	0	6	12	0
OSBPL9	2	0	5	9	0
NRDC	2	0	1	19	0
RAB3B	NA	0	0	0	0
TXNDC12	1	0	0	11	0
BTF3L4	2	0	19	3	0
ZFYVE9	NA	0	0	0	0
ORC1	1	0	0	0	2
PRPF38A	1	0	0	7	0
TUT4	1	0	0	19	0
GPX7	1	0	0	2	0
SHISAL2A	1	0	0	2	0
COA7	NA	0	0	0	0
ZYG11B	NA	0	0	0	0
ECHDC2	1	0	0	1	0
SCP2	2	0	5	14	0
PODN	NA	0	0	0	0
SLC1A7	NA	0	0	0	0
CPT2	NA	0	0	0	0
CZIB	1	0	0	3	0
LRP8	NA	0	0	0	0
DMRTB1	NA	0	0	0	0
GLIS1	NA	0	0	0	0
NDC1	1	0	0	1	0
YIPF1	1	0	0	0	3
DIO1	NA	0	0	0	0
LRRC42	NA	0	0	0	0
LDLRAD1	1	0	0	0	16
TMEM59	1	0	0	22	0
TCEANC2	NA	0	0	0	0
CDCP2	NA	0	0	0	0
CYB5RL	NA	0	0	0	0
MRPL37	1	0	0	5	0
SSBP3	2	0	1	15	0
ACOT11	NA	0	0	0	0
PARS2	NA	0	0	0	0
DHCR24	NA	0	0	0	0
TMEM61	NA	0	0	0	0
BSND	NA	0	0	0	0
PCSK9	NA	0	0	0	0
USP24	2	0	1	5	0
PLPP3	0	0	1	0	0
PRKAA2	NA	0	0	0	0
C8A	NA	0	0	0	0
C8B	NA	0	0	0	0
DAB1	1	0	0	0	1
OMA1	NA	0	0	0	0
MYSM1	3	0	0	2	2
JUN	0	0	22	0	0
FGGY	1	0	0	0	18
HOOK1	1	0	0	0	2
NFIA	1	0	0	2	0
TM2D1	1	0	0	5	0
PATJ	NA	0	0	0	0
KANK4	NA	0	0	0	0
USP1	2	0	1	5	0
DOCK7	2	0	1	2	0
ANGPTL3	NA	0	0	0	0
ATG4C	1	0	0	1	0
ALG6	NA	0	0	0	0
ITGB3BP	1	0	0	2	0
EFCAB7	NA	0	0	0	0
PGM1	1	0	0	1	0
ROR1	NA	0	0	0	0
CACHD1	NA	0	0	0	0
RAVER2	NA	0	0	0	0
JAK1	0	0	22	0	0
DNAJC6	NA	0	0	0	0
LEPROT	1	0	0	8	0
LEPR	NA	0	0	0	0
PDE4B	2	0	4	15	0
SGIP1	NA	0	0	0	0
MIER1	2	0	11	10	0
SLC35D1	1	0	0	0	1
IL12RB2	1	0	0	1	0
SERBP1	0	0	22	0	0
GADD45A	3	0	0	7	1
GNG12	NA	0	0	0	0
WLS	1	0	0	1	0
RPE65	NA	0	0	0	0
DEPDC1	NA	0	0	0	0
LRRC7	NA	0	0	0	0
LRRC40	NA	0	0	0	0
SRSF11	0	0	22	0	0
ANKRD13C	1	0	0	0	1
CTH	NA	0	0	0	0
PTGER3	NA	0	0	0	0
ZRANB2	2	0	3	19	0
NEGR1	1	0	0	1	0
FPGT	NA	0	0	0	0
TNNI3K	NA	0	0	0	0
ERICH3	NA	0	0	0	0
CRYZ	NA	0	0	0	0
TYW3	1	0	0	2	0
LHX8	NA	0	0	0	0
SLC44A5	NA	0	0	0	0
RABGGTB	2	0	4	16	0
MSH4	NA	0	0	0	0
ST6GALNAC3	NA	0	0	0	0
ST6GALNAC5	NA	0	0	0	0
PIGK	3	0	0	2	1
AK5	NA	0	0	0	0
USP33	2	0	2	4	1
MIGA1	NA	0	0	0	0
NEXN	NA	0	0	0	0
FUBP1	2	0	21	1	0
DNAJB4	2	0	1	7	6
GIPC2	1	0	0	0	2
PTGFR	NA	0	0	0	0
ADGRL4	NA	0	0	0	0
ADGRL2	NA	0	0	0	0
TTLL7	1	0	0	1	0
SAMD13	NA	0	0	0	0
DNASE2B	1	0	0	0	4
RPF1	2	0	1	2	2
CTBS	1	0	0	6	0
SSX2IP	NA	0	0	0	0
LPAR3	1	0	0	0	1
MCOLN2	1	0	0	2	0
MCOLN3	NA	0	0	0	0
SYDE2	1	0	0	0	1
C1orf52	1	0	0	11	0
DDAH1	1	0	0	0	1
CCN1	NA	0	0	0	0
ZNHIT6	NA	0	0	0	0
ODF2L	1	0	0	13	0
CLCA2	NA	0	0	0	0
SH3GLB1	2	0	8	11	0
SELENOF	2	0	19	3	0
HS2ST1	1	0	0	1	0
LMO4	2	0	1	7	0
PKN2	2	0	6	2	14
GTF2B	2	0	17	3	0
KYAT3	NA	0	0	0	0
LRRC8B	NA	0	0	0	0
LRRC8C	1	0	0	1	0
LRRC8D	1	0	0	0	3
ZNF326	2	0	8	14	0
BARHL2	NA	0	0	0	0
ZNF644	2	0	19	2	1
HFM1	NA	0	0	0	0
CDC7	NA	0	0	0	0
TGFBR3	1	0	0	1	0
BRDT	NA	0	0	0	0
EPHX4	NA	0	0	0	0
BTBD8	NA	0	0	0	0
C1orf146	NA	0	0	0	0
GLMN	NA	0	0	0	0
RPAP2	1	0	0	2	0
GFI1	1	0	0	0	4
EVI5	2	0	2	1	0
RPL5	2	0	21	1	0
DIPK1A	1	0	0	1	0
MTF2	2	0	6	12	0
TMED5	2	0	13	6	2
CCDC18	1	0	0	2	0
DR1	1	0	0	19	0
FNBP1L	NA	0	0	0	0
BCAR3	1	0	0	1	0
DNTTIP2	2	0	14	6	0
GCLM	1	0	0	0	13
ABCA4	NA	0	0	0	0
ARHGAP29	1	0	0	0	10
ABCD3	NA	0	0	0	0
F3	NA	0	0	0	0
SLC44A3	NA	0	0	0	0
CNN3	1	0	0	1	0
ALG14	1	0	0	1	0
TLCD4	NA	0	0	0	0
RWDD3	NA	0	0	0	0
PTBP2	1	0	0	0	1
DPYD	2	0	3	4	3
SNX7	NA	0	0	0	0
PLPPR5	NA	0	0	0	0
PLPPR4	NA	0	0	0	0
PALMD	NA	0	0	0	0
FRRS1	NA	0	0	0	0
AGL	NA	0	0	0	0
SLC35A3	NA	0	0	0	0
MFSD14A	1	0	0	12	0
SASS6	2	0	1	1	0
TRMT13	NA	0	0	0	0
LRRC39	NA	0	0	0	0
DBT	NA	0	0	0	0
RTCA	1	0	0	10	0
CDC14A	3	0	0	7	2
EXTL2	NA	0	0	0	0
SLC30A7	2	0	2	1	2
DPH5	NA	0	0	0	0
S1PR1	2	0	2	2	0
OLFM3	NA	0	0	0	0
COL11A1	NA	0	0	0	0
RNPC3	1	0	0	3	0
NTNG1	NA	0	0	0	0
VAV3	2	0	5	1	15
SLC25A24	2	0	2	2	15
HENMT1	NA	0	0	0	0
FNDC7	NA	0	0	0	0
STXBP3	1	0	0	4	0
CLCC1	1	0	0	2	0
WDR47	NA	0	0	0	0
TAF13	1	0	0	0	4
CELSR2	NA	0	0	0	0
SORT1	1	0	0	2	0
PSMA5	2	0	16	5	1
SYPL2	NA	0	0	0	0
ATXN7L2	NA	0	0	0	0
GPR61	NA	0	0	0	0
GNAI3	2	0	21	1	0
GNAT2	NA	0	0	0	0
AMPD2	1	0	0	2	0
GSTM4	2	0	1	5	0
EPS8L3	NA	0	0	0	0
CSF1	3	0	0	2	4
AHCYL1	1	0	0	5	0
STRIP1	NA	0	0	0	0
SLC6A17	NA	0	0	0	0
KCNC4	1	0	0	1	0
RBM15	NA	0	0	0	0
SLC16A4	NA	0	0	0	0
LAMTOR5	2	0	7	15	0
PROK1	NA	0	0	0	0
KCNA10	NA	0	0	0	0
KCNA2	NA	0	0	0	0
KCNA3	3	0	0	6	4
LRIF1	NA	0	0	0	0
DRAM2	2	0	1	11	0
CEPT1	2	0	1	1	2
DENND2D	1	0	0	12	0
CHIA	NA	0	0	0	0
WDR77	0	0	2	0	0
ATP5PB	0	0	22	0	0
ADORA3	NA	0	0	0	0
INKA2	NA	0	0	0	0
DDX20	1	0	0	0	1
KCND3	1	0	0	0	1
CTTNBP2NL	3	0	0	1	3
WNT2B	NA	0	0	0	0
ST7L	1	0	0	0	1
CAPZA1	0	0	22	0	0
MOV10	NA	0	0	0	0
RHOC	1	0	0	11	0
PPM1J	2	0	1	1	0
SLC16A1	0	0	1	0	0
LRIG2	NA	0	0	0	0
MAGI3	NA	0	0	0	0
PHTF1	1	0	0	2	0
RSBN1	1	0	0	10	0
PTPN22	2	0	6	2	7
BCL2L15	NA	0	0	0	0
AP4B1	NA	0	0	0	0
DCLRE1B	NA	0	0	0	0
HIPK1	2	0	15	5	0
OLFML3	NA	0	0	0	0
SYT6	NA	0	0	0	0
TRIM33	3	0	0	6	1
BCAS2	2	0	5	15	0
DENND2C	1	0	0	1	0
AMPD1	1	0	0	1	0
NRAS	2	0	3	12	0
CSDE1	0	0	22	0	0
SIKE1	2	0	2	1	0
SYCP1	NA	0	0	0	0
TSHB	NA	0	0	0	0
TSPAN2	NA	0	0	0	0
NGF	NA	0	0	0	0
VANGL1	NA	0	0	0	0
CASQ2	NA	0	0	0	0
NHLH2	NA	0	0	0	0
SLC22A15	NA	0	0	0	0
MAB21L3	NA	0	0	0	0
ATP1A1	2	0	13	7	2
IGSF3	NA	0	0	0	0
PTGFRN	NA	0	0	0	0
TRIM45	NA	0	0	0	0
VTCN1	NA	0	0	0	0
MAN1A2	2	0	1	12	0
TENT5C	2	0	2	13	0
GDAP2	1	0	0	0	1
WDR3	NA	0	0	0	0
SPAG17	NA	0	0	0	0
TBX15	NA	0	0	0	0
WARS2	NA	0	0	0	0
HAO2	NA	0	0	0	0
PHGDH	1	0	0	2	0
HMGCS2	NA	0	0	0	0
REG4	NA	0	0	0	0
NOTCH2	2	0	1	5	3
SEC22B	2	0	2	6	1
PIAS3	NA	0	0	0	0
PEX11B	NA	0	0	0	0
RBM8A	1	0	0	22	0
PRKAB2	NA	0	0	0	0
CHD1L	NA	0	0	0	0
BCL9	NA	0	0	0	0
GJA5	NA	0	0	0	0
GJA8	NA	0	0	0	0
PDE4DIP	1	0	0	7	0
BOLA1	NA	0	0	0	0
SV2A	NA	0	0	0	0
SF3B4	2	0	1	16	0
MTMR11	NA	0	0	0	0
OTUD7B	1	0	0	0	1
VPS45	NA	0	0	0	0
PLEKHO1	2	0	6	7	3
ANP32E	2	0	17	1	2
APH1A	1	0	0	22	0
PRPF3	1	0	0	2	0
RPRD2	1	0	0	1	0
MCL1	0	0	22	0	0
ENSA	2	0	7	15	0
GOLPH3L	NA	0	0	0	0
HORMAD1	NA	0	0	0	0
CTSS	2	0	20	2	0
CTSK	1	0	0	1	0
ARNT	NA	0	0	0	0
SETDB1	NA	0	0	0	0
CERS2	2	0	2	3	1
MINDY1	NA	0	0	0	0
PRUNE1	NA	0	0	0	0
MLLT11	NA	0	0	0	0
GABPB2	1	0	0	0	1
SEMA6C	1	0	0	0	1
SCNM1	1	0	0	9	0
TMOD4	NA	0	0	0	0
VPS72	2	0	1	1	0
PIP5K1A	NA	0	0	0	0
PSMD4	2	0	16	6	0
ZNF687	NA	0	0	0	0
PI4KB	1	0	0	1	0
RFX5	1	0	0	3	0
PSMB4	2	0	20	2	0
POGZ	1	0	0	13	0
CGN	NA	0	0	0	0
TUFT1	NA	0	0	0	0
SNX27	3	0	0	3	2
MRPL9	2	0	1	14	0
S100A11	2	0	4	15	1
S100A12	1	0	0	1	0
S100A6	2	0	4	17	0
S100A4	1	0	0	21	0
S100A1	1	0	0	1	0
CHTOP	2	0	8	14	0
ILF2	2	0	20	2	0
INTS3	NA	0	0	0	0
GATAD2B	1	0	0	6	0
NUP210L	NA	0	0	0	0
C1orf43	2	0	3	19	0
UBAP2L	1	0	0	5	0
HAX1	2	0	1	20	0
AQP10	NA	0	0	0	0
ATP8B2	1	0	0	1	0
IL6R	3	0	0	8	1
SHE	NA	0	0	0	0
UBE2Q1	2	0	9	13	0
CHRNB2	NA	0	0	0	0
ADAR	1	0	0	22	0
KCNN3	1	0	0	1	0
PMVK	3	0	0	8	1
PBXIP1	1	0	0	13	0
PYGO2	1	0	0	2	0
SHC1	1	0	0	1	0
CKS1B	2	0	2	1	0
FLAD1	1	0	0	1	0
ZBTB7B	1	0	0	1	0
DCST2	NA	0	0	0	0
SCAMP3	1	0	0	12	0
CLK2	NA	0	0	0	0
FDPS	2	0	1	11	0
RUSC1	1	0	0	1	0
ASH1L	2	0	21	1	0
MSTO1	NA	0	0	0	0
DAP3	2	0	1	19	0
SYT11	1	0	0	1	0
RIT1	2	0	2	1	18
KHDC4	1	0	0	0	6
ARHGEF2	1	0	0	6	0
SSR2	2	0	19	3	0
UBQLN4	1	0	0	0	3
LAMTOR2	2	0	7	3	1
RAB25	NA	0	0	0	0
MEX3A	NA	0	0	0	0
BGLAP	NA	0	0	0	0
SMG5	NA	0	0	0	0
TMEM79	NA	0	0	0	0
GLMP	2	0	1	1	0
CCT3	2	0	17	5	0
RHBG	NA	0	0	0	0
MEF2D	2	0	8	5	0
IQGAP3	1	0	0	0	21
TTC24	NA	0	0	0	0
NAXE	1	0	0	13	0
HAPLN2	NA	0	0	0	0
BCAN	NA	0	0	0	0
CRABP2	NA	0	0	0	0
ISG20L2	1	0	0	10	0
MRPL24	2	0	4	18	0
HDGF	2	0	11	11	0
PRCC	1	0	0	3	0
NTRK1	NA	0	0	0	0
INSRR	NA	0	0	0	0
PEAR1	NA	0	0	0	0
LRRC71	NA	0	0	0	0
ARHGEF11	NA	0	0	0	0
ETV3	2	0	1	21	0
KIRREL1	NA	0	0	0	0
CADM3	NA	0	0	0	0
DUSP23	2	0	1	3	3
VSIG8	NA	0	0	0	0
CFAP45	NA	0	0	0	0
TAGLN2	1	0	0	22	0
IGSF9	NA	0	0	0	0
PIGM	NA	0	0	0	0
PEA15	1	0	0	7	0
PEX19	NA	0	0	0	0
COPA	2	0	11	10	0
NCSTN	1	0	0	4	0
VANGL2	NA	0	0	0	0
CD48	2	0	3	18	0
F11R	1	0	0	4	0
USF1	NA	0	0	0	0
ARHGAP30	1	0	0	21	0
PFDN2	2	0	1	21	0
UFC1	1	0	0	22	0
USP21	NA	0	0	0	0
PPOX	NA	0	0	0	0
B4GALT3	1	0	0	2	0
ADAMTS4	NA	0	0	0	0
NDUFS2	2	0	11	4	1
FCER1G	2	0	7	1	2
NR1I3	NA	0	0	0	0
MPZ	NA	0	0	0	0
SDHC	2	0	7	12	0
CFAP126	NA	0	0	0	0
FCRLB	NA	0	0	0	0
DUSP12	1	0	0	1	0
OLFML2B	NA	0	0	0	0
UHMK1	1	0	0	20	0
UAP1	2	0	2	1	7
DDR2	1	0	0	1	0
HSD17B7	3	0	0	1	4
RGS4	1	0	0	0	17
RGS5	NA	0	0	0	0
NUF2	2	0	1	1	0
PBX1	1	0	0	1	0
LMX1A	NA	0	0	0	0
RXRG	NA	0	0	0	0
LRRC52	NA	0	0	0	0
MGST3	2	0	4	10	2
ALDH9A1	3	0	0	9	1
TMCO1	2	0	4	18	0
UCK2	3	0	0	1	1
FAM78B	NA	0	0	0	0
TADA1	NA	0	0	0	0
ILDR2	NA	0	0	0	0
MAEL	NA	0	0	0	0
GPA33	NA	0	0	0	0
POU2F1	2	0	1	13	0
CD247	0	0	10	0	0
CREG1	2	0	5	15	0
RCSD1	2	0	19	2	0
MPZL1	3	0	0	1	3
MPC2	2	0	17	5	0
DCAF6	3	0	0	1	6
GPR161	NA	0	0	0	0
TIPRL	1	0	0	9	0
SFT2D2	1	0	0	6	0
TBX19	NA	0	0	0	0
DPT	NA	0	0	0	0
ATP1B1	2	0	2	20	0
NME7	NA	0	0	0	0
BLZF1	NA	0	0	0	0
CCDC181	NA	0	0	0	0
SLC19A2	NA	0	0	0	0
F5	2	0	1	1	0
METTL18	NA	0	0	0	0
SCYL3	NA	0	0	0	0
KIFAP3	NA	0	0	0	0
GORAB	NA	0	0	0	0
PRRX1	1	0	0	1	0
FMO3	NA	0	0	0	0
FMO4	NA	0	0	0	0
PRRC2C	0	0	22	0	0
MYOC	NA	0	0	0	0
VAMP4	1	0	0	0	1
DNM3	NA	0	0	0	0
PIGC	1	0	0	1	0
SUCO	2	0	2	7	6
FASLG	1	0	0	0	3
PRDX6	2	0	18	4	0
KLHL20	NA	0	0	0	0
CENPL	NA	0	0	0	0
DARS2	NA	0	0	0	0
ZBTB37	1	0	0	0	3
SERPINC1	NA	0	0	0	0
RC3H1	2	0	12	1	9
RABGAP1L	2	0	18	1	1
GPR52	NA	0	0	0	0
CACYBP	0	0	22	0	0
MRPS14	2	0	3	1	1
TNN	NA	0	0	0	0
KIAA0040	2	0	5	7	0
TNR	NA	0	0	0	0
COP1	1	0	0	2	0
PAPPA2	NA	0	0	0	0
ASTN1	NA	0	0	0	0
BRINP2	NA	0	0	0	0
SEC16B	NA	0	0	0	0
RASAL2	NA	0	0	0	0
RALGPS2	2	0	3	3	2
ANGPTL1	NA	0	0	0	0
FAM20B	NA	0	0	0	0
TOR3A	1	0	0	7	0
ABL2	1	0	0	1	0
SOAT1	2	0	1	2	0
AXDND1	NA	0	0	0	0
NPHS2	NA	0	0	0	0
TDRD5	NA	0	0	0	0
FAM163A	NA	0	0	0	0
TOR1AIP2	1	0	0	9	0
TOR1AIP1	2	0	7	6	9
CEP350	2	0	1	20	0
QSOX1	3	0	0	3	3
LHX4	NA	0	0	0	0
ACBD6	1	0	0	4	0
XPR1	NA	0	0	0	0
KIAA1614	NA	0	0	0	0
STX6	1	0	0	1	0
IER5	2	0	6	13	1
CACNA1E	NA	0	0	0	0
GLUL	1	0	0	6	0
RGSL1	NA	0	0	0	0
RNASEL	NA	0	0	0	0
RGS8	NA	0	0	0	0
NPL	2	0	3	1	0
LAMC1	NA	0	0	0	0
LAMC2	1	0	0	1	0
NMNAT2	NA	0	0	0	0
SMG7	3	0	0	2	2
NCF2	2	0	3	19	0
ARPC5	2	0	3	19	0
RGL1	1	0	0	0	1
APOBEC4	NA	0	0	0	0
COLGALT2	NA	0	0	0	0
TSEN15	1	0	0	3	0
C1orf21	1	0	0	3	0
EDEM3	2	0	1	1	1
NIBAN1	2	0	3	3	9
RNF2	NA	0	0	0	0
TRMT1L	NA	0	0	0	0
SWT1	NA	0	0	0	0
IVNS1ABP	2	0	10	6	3
HMCN1	1	0	0	1	0
TPR	2	0	16	6	0
ODR4	1	0	0	1	0
PDC	NA	0	0	0	0
PTGS2	1	0	0	0	3
PLA2G4A	1	0	0	0	1
BRINP3	NA	0	0	0	0
RGS18	2	0	2	1	3
RGS21	NA	0	0	0	0
RGS1	2	0	16	6	0
RGS13	1	0	0	3	0
RGS2	2	0	4	18	0
UCHL5	2	0	2	10	0
RO60	1	0	0	18	0
GLRX2	1	0	0	1	0
CDC73	2	0	1	16	0
B3GALT2	NA	0	0	0	0
KCNT2	1	0	0	0	1
F13B	NA	0	0	0	0
ASPM	2	0	1	1	0
ZBTB41	NA	0	0	0	0
CRB1	NA	0	0	0	0
DENND1B	2	0	6	16	0
C1orf53	NA	0	0	0	0
LHX9	NA	0	0	0	0
NEK7	1	0	0	4	0
ATP6V1G3	NA	0	0	0	0
PTPRC	0	0	22	0	0
NR5A2	NA	0	0	0	0
KIF14	1	0	0	0	1
DDX59	NA	0	0	0	0
CAMSAP2	1	0	0	0	6
KIF21B	1	0	0	2	0
CACNA1S	NA	0	0	0	0
TMEM9	1	0	0	1	0
PKP1	NA	0	0	0	0
TNNT2	NA	0	0	0	0
LAD1	NA	0	0	0	0
TNNI1	NA	0	0	0	0
CSRP1	2	0	2	4	3
NAV1	3	0	0	1	1
IPO9	1	0	0	1	0
SHISA4	NA	0	0	0	0
LMOD1	NA	0	0	0	0
TIMM17A	2	0	4	7	2
RNPEP	2	0	1	5	0
ELF3	NA	0	0	0	0
GPR37L1	NA	0	0	0	0
ARL8A	1	0	0	5	0
PTPN7	1	0	0	17	0
LGR6	NA	0	0	0	0
UBE2T	2	0	1	1	0
PPP1R12B	2	0	1	1	0
SYT2	NA	0	0	0	0
KDM5B	2	0	1	3	2
RABIF	1	0	0	2	0
KLHL12	NA	0	0	0	0
ADIPOR1	1	0	0	20	0
TMEM183A	1	0	0	17	0
PPFIA4	NA	0	0	0	0
MYOG	NA	0	0	0	0
ADORA1	NA	0	0	0	0
MYBPH	NA	0	0	0	0
BTG2	2	0	21	1	0
FMOD	NA	0	0	0	0
PRELP	1	0	0	1	0
OPTC	NA	0	0	0	0
ATP2B4	2	0	1	4	5
SNRPE	2	0	21	1	0
SOX13	1	0	0	0	1
ETNK2	NA	0	0	0	0
REN	NA	0	0	0	0
GOLT1A	NA	0	0	0	0
PLEKHA6	NA	0	0	0	0
PIK3C2B	1	0	0	0	3
MDM4	2	0	15	7	0
LRRN2	NA	0	0	0	0
NFASC	1	0	0	1	0
CNTN2	NA	0	0	0	0
TMEM81	NA	0	0	0	0
RBBP5	NA	0	0	0	0
DSTYK	NA	0	0	0	0
TMCC2	NA	0	0	0	0
NUAK2	1	0	0	1	0
KLHDC8A	NA	0	0	0	0
CDK18	NA	0	0	0	0
MFSD4A	NA	0	0	0	0
ELK4	2	0	1	10	0
SLC45A3	1	0	0	0	13
NUCKS1	0	0	22	0	0
RAB29	3	0	0	5	1
SLC41A1	1	0	0	0	19
PM20D1	1	0	0	0	2
SLC26A9	NA	0	0	0	0
RAB7B	3	0	0	1	1
CTSE	NA	0	0	0	0
AVPR1B	NA	0	0	0	0
IKBKE	3	0	0	1	2
RASSF5	2	0	3	16	1
EIF2D	1	0	0	1	0
DYRK3	NA	0	0	0	0
MAPKAPK2	2	0	11	3	3
IL10	NA	0	0	0	0
IL19	NA	0	0	0	0
C1orf116	1	0	0	0	1
PFKFB2	NA	0	0	0	0
YOD1	NA	0	0	0	0
CD34	NA	0	0	0	0
PLXNA2	NA	0	0	0	0
CAMK1G	NA	0	0	0	0
LAMB3	1	0	0	1	0
G0S2	1	0	0	4	0
TRAF3IP3	2	0	11	8	0
C1orf74	NA	0	0	0	0
IRF6	NA	0	0	0	0
UTP25	NA	0	0	0	0
SYT14	NA	0	0	0	0
SERTAD4	NA	0	0	0	0
HHAT	NA	0	0	0	0
KCNH1	NA	0	0	0	0
TRAF5	2	0	10	7	0
RD3	1	0	0	0	5
SLC30A1	1	0	0	0	3
NEK2	1	0	0	0	1
LPGAT1	1	0	0	6	0
INTS7	NA	0	0	0	0
DTL	1	0	0	1	0
PPP2R5A	2	0	1	4	3
PACC1	1	0	0	0	2
ATF3	2	0	10	1	10
BATF3	2	0	1	4	0
NSL1	1	0	0	5	0
TATDN3	3	0	0	1	5
FLVCR1	NA	0	0	0	0
VASH2	NA	0	0	0	0
ANGEL2	NA	0	0	0	0
RPS6KC1	NA	0	0	0	0
PROX1	NA	0	0	0	0
SMYD2	NA	0	0	0	0
PTPN14	NA	0	0	0	0
CENPF	0	0	2	0	0
KCNK2	NA	0	0	0	0
KCTD3	NA	0	0	0	0
USH2A	NA	0	0	0	0
ESRRG	1	0	0	0	2
GPATCH2	NA	0	0	0	0
SPATA17	NA	0	0	0	0
RRP15	0	0	1	0	0
TGFB2	NA	0	0	0	0
LYPLAL1	1	0	0	3	0
SLC30A10	NA	0	0	0	0
BPNT1	2	0	1	1	0
IARS2	1	0	0	8	0
RAB3GAP2	1	0	0	2	0
C1orf115	NA	0	0	0	0
HLX	1	0	0	1	0
DUSP10	2	0	7	13	0
HHIPL2	NA	0	0	0	0
TAF1A	NA	0	0	0	0
AIDA	1	0	0	7	0
BROX	1	0	0	5	0
DISP1	NA	0	0	0	0
SUSD4	NA	0	0	0	0
CAPN8	NA	0	0	0	0
CAPN2	2	0	1	11	0
TP53BP2	2	0	1	4	1
FBXO28	NA	0	0	0	0
DEGS1	2	0	9	8	4
NVL	NA	0	0	0	0
CNIH4	3	0	0	5	1
WDR26	2	0	9	11	0
CNIH3	NA	0	0	0	0
LBR	2	0	17	3	1
ENAH	0	0	1	0	0
SRP9	2	0	8	14	0
TMEM63A	1	0	0	5	0
SDE2	2	0	3	18	0
ACBD3	2	0	4	5	9
MIXL1	NA	0	0	0	0
LIN9	NA	0	0	0	0
PARP1	2	0	9	8	2
STUM	NA	0	0	0	0
ITPKB	1	0	0	6	0
PSEN2	1	0	0	0	1
COQ8A	NA	0	0	0	0
CDC42BPA	NA	0	0	0	0
SNAP47	NA	0	0	0	0
JMJD4	NA	0	0	0	0
WNT9A	NA	0	0	0	0
WNT3A	NA	0	0	0	0
ARF1	0	0	22	0	0
C1orf35	1	0	0	4	0
GUK1	2	0	5	17	0
GJC2	NA	0	0	0	0
IBA57	NA	0	0	0	0
OBSCN	NA	0	0	0	0
RHOU	1	0	0	1	0
RAB4A	3	0	0	10	1
CCSAP	NA	0	0	0	0
NUP133	NA	0	0	0	0
ABCB10	NA	0	0	0	0
TAF5L	NA	0	0	0	0
URB2	NA	0	0	0	0
GALNT2	3	0	0	4	1
PGBD5	NA	0	0	0	0
COG2	NA	0	0	0	0
AGT	NA	0	0	0	0
CAPN9	NA	0	0	0	0
C1orf198	NA	0	0	0	0
TTC13	NA	0	0	0	0
ARV1	NA	0	0	0	0
FAM89A	1	0	0	1	0
TRIM67	NA	0	0	0	0
C1orf131	2	0	1	2	0
GNPAT	1	0	0	3	0
EXOC8	NA	0	0	0	0
SPRTN	NA	0	0	0	0
EGLN1	3	0	0	1	16
TSNAX	1	0	0	6	0
DISC1	1	0	0	0	2
SIPA1L2	2	0	1	5	0
MAP10	NA	0	0	0	0
NTPCR	1	0	0	1	0
PCNX2	NA	0	0	0	0
MAP3K21	NA	0	0	0	0
KCNK1	1	0	0	0	9
SLC35F3	NA	0	0	0	0
COA6	1	0	0	5	0
TARBP1	1	0	0	1	0
IRF2BP2	2	0	15	5	0
TOMM20	0	0	22	0	0
RBM34	1	0	0	0	7
ARID4B	0	0	22	0	0
GGPS1	1	0	0	0	17
TBCE	NA	0	0	0	0
B3GALNT2	NA	0	0	0	0
GNG4	1	0	0	0	1
LYST	2	0	1	8	4
NID1	NA	0	0	0	0
GPR137B	2	0	3	8	0
ERO1B	2	0	4	1	13
LGALS8	2	0	1	5	5
HEATR1	NA	0	0	0	0
ACTN2	NA	0	0	0	0
MTR	1	0	0	0	2
RYR2	NA	0	0	0	0
ZP4	NA	0	0	0	0
CHRM3	NA	0	0	0	0
GREM2	NA	0	0	0	0
RGS7	NA	0	0	0	0
FH	2	0	2	6	0
KMO	NA	0	0	0	0
OPN3	1	0	0	2	0
WDR64	NA	0	0	0	0
EXO1	NA	0	0	0	0
MAP1LC3C	NA	0	0	0	0
PLD5	NA	0	0	0	0
CEP170	2	0	4	2	1
AKT3	NA	0	0	0	0
ZBTB18	NA	0	0	0	0
DESI2	1	0	0	5	0
COX20	1	0	0	17	0
HNRNPU	0	0	22	0	0
EFCAB2	NA	0	0	0	0
KIF26B	NA	0	0	0	0
SMYD3	NA	0	0	0	0
TFB2M	NA	0	0	0	0
CNST	2	0	5	4	4
SCCPDH	3	0	0	1	1
AHCTF1	3	0	0	4	1
ZNF692	NA	0	0	0	0
FAM110C	NA	0	0	0	0
SH3YL1	1	0	0	2	0
ACP1	2	0	4	18	0
ALKAL2	NA	0	0	0	0
TMEM18	1	0	0	6	0
SNTG2	NA	0	0	0	0
TPO	NA	0	0	0	0
PXDN	NA	0	0	0	0
MYT1L	NA	0	0	0	0
EIPR1	1	0	0	1	0
TRAPPC12	NA	0	0	0	0
ADI1	1	0	0	9	0
RNASEH1	1	0	0	4	0
RPS7	2	0	21	1	0
COLEC11	NA	0	0	0	0
SOX11	NA	0	0	0	0
CMPK2	1	0	0	0	1
RSAD2	NA	0	0	0	0
RNF144A	1	0	0	0	4
ID2	2	0	14	1	5
KIDINS220	2	0	1	2	12
MBOAT2	1	0	0	1	0
ASAP2	1	0	0	0	2
ITGB1BP1	2	0	1	7	0
CPSF3	1	0	0	2	0
IAH1	1	0	0	11	0
ADAM17	2	0	2	5	0
YWHAQ	0	0	22	0	0
TAF1B	NA	0	0	0	0
GRHL1	NA	0	0	0	0
KLF11	3	0	0	2	1
RRM2	0	0	2	0	0
HPCAL1	2	0	9	4	5
ODC1	2	0	20	1	1
NOL10	1	0	0	1	0
ATP6V1C2	NA	0	0	0	0
PDIA6	2	0	10	11	0
KCNF1	NA	0	0	0	0
C2orf50	NA	0	0	0	0
SLC66A3	1	0	0	3	0
ROCK2	2	0	1	13	0
E2F6	NA	0	0	0	0
GREB1	NA	0	0	0	0
LPIN1	1	0	0	14	0
TRIB2	1	0	0	0	10
LRATD1	NA	0	0	0	0
NBAS	1	0	0	1	0
DDX1	2	0	3	2	9
MYCN	NA	0	0	0	0
VSNL1	NA	0	0	0	0
SMC6	1	0	0	6	0
GEN1	NA	0	0	0	0
MSGN1	NA	0	0	0	0
KCNS3	NA	0	0	0	0
RDH14	NA	0	0	0	0
NT5C1B	1	0	0	0	1
OSR1	NA	0	0	0	0
TTC32	1	0	0	0	2
WDR35	NA	0	0	0	0
MATN3	NA	0	0	0	0
LAPTM4A	2	0	21	1	0
SDC1	3	0	0	2	2
PUM2	2	0	15	1	2
RHOB	2	0	15	5	1
HS1BP3	NA	0	0	0	0
LDAH	NA	0	0	0	0
APOB	NA	0	0	0	0
TDRD15	NA	0	0	0	0
KLHL29	NA	0	0	0	0
ATAD2B	2	0	1	3	11
UBXN2A	3	0	0	1	1
MFSD2B	NA	0	0	0	0
WDCP	NA	0	0	0	0
FKBP1B	1	0	0	1	0
SF3B6	0	0	22	0	0
TP53I3	1	0	0	1	0
PFN4	NA	0	0	0	0
ITSN2	2	0	19	3	0
NCOA1	2	0	4	13	0
PTRHD1	1	0	0	10	0
CENPO	NA	0	0	0	0
ADCY3	NA	0	0	0	0
DNAJC27	NA	0	0	0	0
EFR3B	NA	0	0	0	0
POMC	NA	0	0	0	0
DNMT3A	1	0	0	0	21
ASXL2	2	0	2	18	0
KIF3C	NA	0	0	0	0
RAB10	2	0	20	2	0
GAREM2	NA	0	0	0	0
HADHA	2	0	2	19	0
HADHB	2	0	2	9	0
SELENOI	1	0	0	1	0
DRC1	NA	0	0	0	0
OTOF	NA	0	0	0	0
KCNK3	NA	0	0	0	0
SLC35F6	3	0	0	1	1
CENPA	1	0	0	1	0
MAPRE3	NA	0	0	0	0
TMEM214	0	0	2	0	0
AGBL5	NA	0	0	0	0
KHK	NA	0	0	0	0
ABHD1	NA	0	0	0	0
PREB	1	0	0	3	0
SLC5A6	NA	0	0	0	0
CAD	NA	0	0	0	0
SLC30A3	NA	0	0	0	0
TRIM54	NA	0	0	0	0
UCN	NA	0	0	0	0
GTF3C2	NA	0	0	0	0
EIF2B4	2	0	1	4	0
SNX17	1	0	0	22	0
ZNF513	NA	0	0	0	0
PPM1G	2	0	3	19	0
NRBP1	2	0	1	18	0
KRTCAP3	NA	0	0	0	0
IFT172	NA	0	0	0	0
FNDC4	NA	0	0	0	0
ZNF512	NA	0	0	0	0
GPN1	1	0	0	3	0
SUPT7L	NA	0	0	0	0
SLC4A1AP	1	0	0	1	0
RBKS	NA	0	0	0	0
BABAM2	1	0	0	0	1
FOSL2	2	0	10	1	5
PLB1	NA	0	0	0	0
PPP1CB	0	0	22	0	0
SPDYA	NA	0	0	0	0
TRMT61B	NA	0	0	0	0
WDR43	2	0	4	6	5
TOGARAM2	NA	0	0	0	0
PCARE	NA	0	0	0	0
CLIP4	3	0	0	2	3
ALK	NA	0	0	0	0
YPEL5	1	0	0	22	0
LCLAT1	1	0	0	0	9
CAPN13	NA	0	0	0	0
GALNT14	NA	0	0	0	0
CAPN14	NA	0	0	0	0
EHD3	1	0	0	0	20
XDH	1	0	0	0	2
SRD5A2	NA	0	0	0	0
MEMO1	1	0	0	0	1
DPY30	2	0	2	6	1
SPAST	NA	0	0	0	0
SLC30A6	NA	0	0	0	0
YIPF4	2	0	3	8	1
BIRC6	0	0	22	0	0
TTC27	NA	0	0	0	0
LTBP1	1	0	0	1	0
RASGRP3	2	0	5	3	0
FAM98A	1	0	0	2	0
CRIM1	1	0	0	0	1
FEZ2	2	0	1	5	3
VIT	1	0	0	1	0
STRN	1	0	0	0	4
HEATR5B	NA	0	0	0	0
GPATCH11	2	0	1	2	1
EIF2AK2	1	0	0	12	0
SULT6B1	NA	0	0	0	0
CEBPZOS	1	0	0	1	0
CEBPZ	2	0	8	13	0
NDUFAF7	NA	0	0	0	0
PRKD3	2	0	5	4	4
QPCT	1	0	0	3	0
CDC42EP3	1	0	0	13	0
RMDN2	NA	0	0	0	0
CYP1B1	1	0	0	2	0
ATL2	3	0	0	1	20
HNRNPLL	2	0	5	5	0
GALM	1	0	0	0	1
DHX57	NA	0	0	0	0
MORN2	NA	0	0	0	0
ARHGEF33	NA	0	0	0	0
SOS1	3	0	0	1	6
MAP4K3	1	0	0	0	8
THUMPD2	NA	0	0	0	0
SLC8A1	2	0	1	3	0
PKDCC	NA	0	0	0	0
EML4	2	0	11	10	0
COX7A2L	2	0	4	18	0
KCNG3	NA	0	0	0	0
MTA3	NA	0	0	0	0
HAAO	NA	0	0	0	0
ZFP36L2	2	0	18	4	0
THADA	NA	0	0	0	0
PLEKHH2	NA	0	0	0	0
DYNC2LI1	NA	0	0	0	0
ABCG5	NA	0	0	0	0
ABCG8	NA	0	0	0	0
LRPPRC	2	0	6	6	0
PPM1B	2	0	7	9	3
SLC3A1	NA	0	0	0	0
PREPL	1	0	0	1	0
CAMKMT	1	0	0	0	1
SIX3	NA	0	0	0	0
SRBD1	1	0	0	1	0
PRKCE	1	0	0	0	4
EPAS1	2	0	1	4	2
RHOQ	2	0	5	4	1
PIGF	1	0	0	1	0
CRIPT	1	0	0	6	0
SOCS5	NA	0	0	0	0
MCFD2	2	0	2	2	0
TTC7A	2	0	1	6	4
CALM2	0	0	22	0	0
EPCAM	NA	0	0	0	0
MSH2	1	0	0	1	0
KCNK12	1	0	0	0	1
MSH6	2	0	1	2	0
FBXO11	2	0	1	4	13
FOXN2	2	0	4	3	5
PPP1R21	1	0	0	0	2
STON1	NA	0	0	0	0
GTF2A1L	NA	0	0	0	0
LHCGR	NA	0	0	0	0
FSHR	NA	0	0	0	0
NRXN1	NA	0	0	0	0
ASB3	NA	0	0	0	0
CHAC2	1	0	0	1	0
ERLEC1	2	0	5	6	0
GPR75	NA	0	0	0	0
PSME4	2	0	6	11	0
ACYP2	1	0	0	4	0
SPTBN1	2	0	9	1	8
EML6	NA	0	0	0	0
RTN4	0	0	22	0	0
MTIF2	1	0	0	1	0
CCDC88A	2	0	6	2	3
CFAP36	1	0	0	1	0
PNPT1	NA	0	0	0	0
EFEMP1	NA	0	0	0	0
CCDC85A	NA	0	0	0	0
VRK2	1	0	0	0	2
FANCL	1	0	0	0	1
BCL11A	2	0	5	2	2
PAPOLG	NA	0	0	0	0
REL	2	0	20	1	0
PUS10	1	0	0	0	4
PEX13	NA	0	0	0	0
USP34	2	0	16	5	1
XPO1	2	0	18	4	0
FAM161A	NA	0	0	0	0
CCT4	0	0	22	0	0
COMMD1	2	0	4	5	1
B3GNT2	2	0	3	1	14
TMEM17	NA	0	0	0	0
EHBP1	1	0	0	0	10
OTX1	NA	0	0	0	0
WDPCP	NA	0	0	0	0
MDH1	2	0	10	12	0
UGP2	2	0	1	19	0
VPS54	1	0	0	0	3
PELI1	2	0	12	6	2
LGALSL	NA	0	0	0	0
AFTPH	2	0	2	15	0
SERTAD2	2	0	12	10	0
SLC1A4	2	0	2	2	0
CEP68	1	0	0	1	0
RAB1A	2	0	20	2	0
ACTR2	0	0	22	0	0
SPRED2	3	0	0	1	2
MEIS1	NA	0	0	0	0
ETAA1	NA	0	0	0	0
C1D	2	0	4	16	1
PNO1	2	0	1	1	1
PPP3R1	2	0	10	3	5
CNRIP1	2	0	1	1	0
PLEK	2	0	10	3	2
FBXO48	NA	0	0	0	0
APLF	NA	0	0	0	0
ARHGAP25	3	0	0	9	3
BMP10	NA	0	0	0	0
GKN2	NA	0	0	0	0
ANTXR1	NA	0	0	0	0
GFPT1	2	0	2	2	0
NFU1	3	0	0	4	2
AAK1	3	0	0	13	1
SNRNP27	2	0	4	3	0
MXD1	2	0	2	5	1
C2orf42	NA	0	0	0	0
TIA1	2	0	9	2	9
PCYOX1	1	0	0	0	1
SNRPG	0	0	22	0	0
FAM136A	2	0	1	5	1
TGFA	NA	0	0	0	0
ADD2	NA	0	0	0	0
MCEE	1	0	0	2	0
MPHOSPH10	2	0	4	14	0
DYSF	1	0	0	2	0
CYP26B1	NA	0	0	0	0
EXOC6B	NA	0	0	0	0
SPR	NA	0	0	0	0
EMX1	NA	0	0	0	0
SFXN5	NA	0	0	0	0
RAB11FIP5	1	0	0	0	1
SMYD5	NA	0	0	0	0
PRADC1	1	0	0	2	0
CCT7	2	0	18	4	0
FBXO41	NA	0	0	0	0
EGR4	NA	0	0	0	0
TPRKB	2	0	1	4	0
STAMBP	1	0	0	2	0
ACTG2	NA	0	0	0	0
DGUOK	1	0	0	22	0
TET3	2	0	1	17	0
BOLA3	2	0	3	2	6
MOB1A	1	0	0	22	0
MTHFD2	2	0	9	7	3
SLC4A5	NA	0	0	0	0
WDR54	1	0	0	1	0
RTKN	NA	0	0	0	0
WBP1	1	0	0	3	0
MOGS	1	0	0	2	0
CCDC142	NA	0	0	0	0
PCGF1	NA	0	0	0	0
AUP1	2	0	3	19	0
HTRA2	2	0	2	8	0
LOXL3	NA	0	0	0	0
DOK1	1	0	0	0	22
M1AP	NA	0	0	0	0
HK2	2	0	1	19	0
POLE4	2	0	10	8	1
TACR1	NA	0	0	0	0
MRPL19	2	0	1	1	0
LRRTM4	NA	0	0	0	0
CTNNA2	NA	0	0	0	0
LRRTM1	NA	0	0	0	0
SUCLG1	2	0	2	12	0
TRABD2A	1	0	0	5	0
TCF7L1	1	0	0	1	0
RETSAT	NA	0	0	0	0
CAPG	1	0	0	9	0
USP39	1	0	0	2	0
ATOH8	NA	0	0	0	0
ST3GAL5	1	0	0	4	0
POLR1A	NA	0	0	0	0
PTCD3	1	0	0	3	0
IMMT	2	0	3	6	4
MRPL35	2	0	2	4	0
REEP1	NA	0	0	0	0
KDM3A	1	0	0	0	11
CHMP3	2	0	4	7	1
RNF103	1	0	0	0	4
RMND5A	1	0	0	6	0
SMYD1	NA	0	0	0	0
FABP1	NA	0	0	0	0
THNSL2	NA	0	0	0	0
EIF2AK3	2	0	6	13	0
RPIA	3	0	0	6	1
MAL	1	0	0	5	0
MRPS5	2	0	2	14	0
PROM2	NA	0	0	0	0
FAHD2A	2	0	1	3	0
ADRA2B	NA	0	0	0	0
TMEM127	1	0	0	3	0
CIAO1	2	0	1	11	0
SNRNP200	2	0	3	19	0
NCAPH	2	0	1	1	0
ARID5A	2	0	1	16	0
KANSL3	NA	0	0	0	0
LMAN2L	NA	0	0	0	0
CNNM4	NA	0	0	0	0
ANKRD39	3	0	0	1	1
SEMA4C	NA	0	0	0	0
ZAP70	2	0	9	1	0
TMEM131	2	0	9	13	0
VWA3B	NA	0	0	0	0
INPP4A	2	0	7	1	7
UNC50	3	0	0	3	1
MGAT4A	2	0	10	2	2
TSGA10	NA	0	0	0	0
LIPT1	NA	0	0	0	0
MITD1	1	0	0	8	0
TXNDC9	1	0	0	3	0
EIF5B	0	0	22	0	0
REV1	1	0	0	0	16
AFF3	1	0	0	6	0
LONRF2	1	0	0	0	6
CHST10	1	0	0	0	3
PDCL3	3	0	0	12	1
NPAS2	NA	0	0	0	0
RPL31	2	0	21	1	0
TBC1D8	3	0	0	1	2
CNOT11	NA	0	0	0	0
RNF149	2	0	6	13	0
CREG2	NA	0	0	0	0
RFX8	NA	0	0	0	0
MAP4K4	2	0	3	10	4
IL1R2	2	0	1	2	0
IL1RL1	NA	0	0	0	0
IL18R1	2	0	2	3	0
IL18RAP	2	0	1	1	2
SLC9A4	NA	0	0	0	0
SLC9A2	NA	0	0	0	0
MFSD9	NA	0	0	0	0
TMEM182	NA	0	0	0	0
POU3F3	NA	0	0	0	0
MRPS9	0	0	2	0	0
TGFBRAP1	1	0	0	0	1
C2orf49	1	0	0	0	3
FHL2	NA	0	0	0	0
NCK2	2	0	7	1	7
ECRG4	NA	0	0	0	0
UXS1	3	0	0	1	1
ST6GAL2	NA	0	0	0	0
SLC5A7	NA	0	0	0	0
SULT1C3	NA	0	0	0	0
GCC2	2	0	9	13	0
EDAR	1	0	0	0	2
SH3RF3	NA	0	0	0	0
SEPTIN10	NA	0	0	0	0
SOWAHC	1	0	0	0	8
MALL	NA	0	0	0	0
NPHP1	NA	0	0	0	0
BUB1	2	0	1	1	1
ANAPC1	NA	0	0	0	0
MERTK	1	0	0	0	4
FBLN7	1	0	0	2	0
ZC3H6	1	0	0	0	1
TTL	1	0	0	0	1
POLR1B	NA	0	0	0	0
SLC20A1	1	0	0	14	0
NT5DC4	NA	0	0	0	0
IL1B	0	0	3	0	0
SLC35F5	NA	0	0	0	0
ACTR3	0	0	22	0	0
DPP10	NA	0	0	0	0
DDX18	1	0	0	22	0
CCDC93	3	0	0	2	1
INSIG2	3	0	0	1	2
EN1	NA	0	0	0	0
MARCO	0	0	2	0	0
C1QL2	NA	0	0	0	0
STEAP3	NA	0	0	0	0
C2orf76	NA	0	0	0	0
DBI	2	0	20	2	0
TMEM37	NA	0	0	0	0
SCTR	NA	0	0	0	0
CFAP221	NA	0	0	0	0
TMEM177	NA	0	0	0	0
PTPN4	2	0	3	3	5
EPB41L5	NA	0	0	0	0
RALB	2	0	1	3	0
INHBB	NA	0	0	0	0
TFCP2L1	NA	0	0	0	0
CLASP1	1	0	0	1	0
NIFK	2	0	5	7	5
TSN	2	0	2	6	3
CNTNAP5	NA	0	0	0	0
GYPC	1	0	0	20	0
BIN1	2	0	2	15	2
CYP27C1	NA	0	0	0	0
ERCC3	NA	0	0	0	0
MAP3K2	2	0	7	13	0
IWS1	2	0	3	1	17
MYO7B	NA	0	0	0	0
LIMS2	1	0	0	0	11
GPR17	NA	0	0	0	0
WDR33	2	0	16	5	0
SFT2D3	1	0	0	0	4
POLR2D	2	0	2	3	0
AMMECR1L	NA	0	0	0	0
SAP130	NA	0	0	0	0
UGGT1	2	0	1	1	0
HS6ST1	1	0	0	0	3
SMPD4	1	0	0	2	0
IMP4	2	0	2	12	0
AMER3	NA	0	0	0	0
FAM168B	1	0	0	0	8
PLEKHB2	2	0	3	8	1
GPR39	NA	0	0	0	0
LYPD1	NA	0	0	0	0
NCKAP5	NA	0	0	0	0
MGAT5	2	0	5	3	6
TMEM163	1	0	0	1	0
ACMSD	NA	0	0	0	0
CCNT2	1	0	0	0	7
MAP3K19	NA	0	0	0	0
RAB3GAP1	1	0	0	11	0
ZRANB3	1	0	0	0	1
R3HDM1	2	0	2	19	0
UBXN4	2	0	21	1	0
LCT	NA	0	0	0	0
MCM6	2	0	2	6	0
CXCR4	2	0	18	4	0
THSD7B	1	0	0	0	10
HNMT	1	0	0	4	0
SPOPL	2	0	1	21	0
NXPH2	NA	0	0	0	0
KYNU	1	0	0	6	0
ARHGAP15	2	0	17	3	0
GTDC1	1	0	0	0	12
ZEB2	2	0	9	2	7
ACVR2A	1	0	0	0	1
ORC4	NA	0	0	0	0
MBD5	3	0	0	2	8
EPC2	1	0	0	4	0
KIF5C	1	0	0	0	1
LYPD6B	NA	0	0	0	0
LYPD6	NA	0	0	0	0
MMADHC	2	0	2	20	0
RND3	NA	0	0	0	0
RBM43	NA	0	0	0	0
NMI	2	0	3	3	2
TNFAIP6	NA	0	0	0	0
RIF1	2	0	1	6	1
ARL5A	2	0	8	9	4
CACNB4	NA	0	0	0	0
STAM2	1	0	0	0	6
FMNL2	2	0	2	2	0
PRPF40A	0	0	22	0	0
RPRM	NA	0	0	0	0
GALNT13	NA	0	0	0	0
KCNJ3	NA	0	0	0	0
NR4A2	2	0	9	9	1
GPD2	1	0	0	0	3
ERMN	NA	0	0	0	0
CYTIP	2	0	16	5	0
ACVR1C	NA	0	0	0	0
ACVR1	NA	0	0	0	0
UPP2	NA	0	0	0	0
CCDC148	NA	0	0	0	0
PKP4	NA	0	0	0	0
TANC1	1	0	0	0	5
WDSUB1	3	0	0	1	1
BAZ2B	2	0	4	5	1
LY75	2	0	2	18	0
PLA2R1	2	0	1	3	0
ITGB6	NA	0	0	0	0
RBMS1	2	0	15	1	2
TANK	3	0	0	19	1
PSMD14	2	0	3	8	2
TBR1	NA	0	0	0	0
SLC4A10	NA	0	0	0	0
GCG	NA	0	0	0	0
FAP	1	0	0	0	3
IFIH1	3	0	0	1	4
KCNH7	NA	0	0	0	0
FIGN	NA	0	0	0	0
GRB14	NA	0	0	0	0
COBLL1	1	0	0	7	0
SLC38A11	NA	0	0	0	0
CSRNP3	NA	0	0	0	0
GALNT3	1	0	0	0	1
TTC21B	NA	0	0	0	0
B3GALT1	NA	0	0	0	0
STK39	1	0	0	1	0
CERS6	1	0	0	3	0
SPC25	0	0	2	0	0
G6PC2	NA	0	0	0	0
ABCB11	NA	0	0	0	0
DHRS9	1	0	0	1	0
LRP2	NA	0	0	0	0
KLHL41	NA	0	0	0	0
FASTKD1	1	0	0	1	0
PPIG	0	0	22	0	0
PHOSPHO2	NA	0	0	0	0
KLHL23	1	0	0	1	0
SSB	2	0	17	5	0
METTL5	2	0	1	8	0
UBR3	NA	0	0	0	0
MYO3B	NA	0	0	0	0
SP5	NA	0	0	0	0
GAD1	NA	0	0	0	0
GORASP2	2	0	3	11	2
TLK1	2	0	5	14	0
METTL8	1	0	0	2	0
DCAF17	NA	0	0	0	0
CYBRD1	1	0	0	1	0
DYNC1I2	2	0	3	6	1
SLC25A12	NA	0	0	0	0
HAT1	1	0	0	10	0
METAP1D	NA	0	0	0	0
DLX1	NA	0	0	0	0
DLX2	NA	0	0	0	0
ITGA6	1	0	0	3	0
PDK1	1	0	0	2	0
RAPGEF4	NA	0	0	0	0
CDCA7	2	0	1	1	0
SP3	2	0	17	3	2
OLA1	2	0	2	15	0
SP9	NA	0	0	0	0
CIR1	2	0	1	20	0
SCRN3	NA	0	0	0	0
GPR155	NA	0	0	0	0
WIPF1	2	0	20	2	0
CHRNA1	NA	0	0	0	0
CHN1	1	0	0	1	0
ATF2	2	0	1	15	0
ATP5MC3	0	0	22	0	0
LNPK	NA	0	0	0	0
EVX2	NA	0	0	0	0
HOXD13	NA	0	0	0	0
HOXD12	NA	0	0	0	0
HOXD11	NA	0	0	0	0
HOXD10	NA	0	0	0	0
HOXD9	NA	0	0	0	0
HOXD8	NA	0	0	0	0
HOXD3	NA	0	0	0	0
HOXD4	NA	0	0	0	0
MTX2	1	0	0	1	0
HNRNPA3	0	0	22	0	0
NFE2L2	2	0	3	18	0
AGPS	1	0	0	2	0
RBM45	NA	0	0	0	0
OSBPL6	NA	0	0	0	0
PJVK	NA	0	0	0	0
FKBP7	NA	0	0	0	0
PLEKHA3	1	0	0	2	0
TTN	1	0	0	4	0
CCDC141	NA	0	0	0	0
SESTD1	3	0	0	3	1
ZNF385B	NA	0	0	0	0
CWC22	1	0	0	0	18
UBE2E3	1	0	0	14	0
ITGA4	2	0	17	3	0
CERKL	NA	0	0	0	0
NEUROD1	NA	0	0	0	0
ITPRID2	1	0	0	4	0
PPP1R1C	NA	0	0	0	0
PDE1A	1	0	0	0	1
DNAJC10	2	0	4	5	1
FRZB	NA	0	0	0	0
NCKAP1	1	0	0	1	0
DUSP19	NA	0	0	0	0
NUP35	NA	0	0	0	0
ZNF804A	NA	0	0	0	0
ZC3H15	0	0	22	0	0
ITGAV	2	0	2	16	0
FAM171B	NA	0	0	0	0
CALCRL	NA	0	0	0	0
TFPI	NA	0	0	0	0
GULP1	NA	0	0	0	0
WDR75	1	0	0	0	1
SLC40A1	1	0	0	0	4
ASNSD1	NA	0	0	0	0
OSGEPL1	NA	0	0	0	0
ORMDL1	2	0	1	20	0
PMS1	NA	0	0	0	0
MSTN	NA	0	0	0	0
HIBCH	2	0	1	2	1
MFSD6	1	0	0	0	5
NEMP2	NA	0	0	0	0
NAB1	1	0	0	0	17
GLS	2	0	19	3	0
STAT1	2	0	11	8	2
STAT4	2	0	10	1	3
MYO1B	3	0	0	1	6
NABP1	3	0	0	10	1
TMEFF2	NA	0	0	0	0
SLC39A10	2	0	1	1	1
DNAH7	NA	0	0	0	0
STK17B	2	0	17	5	0
HECW2	NA	0	0	0	0
GTF3C3	NA	0	0	0	0
C2orf66	NA	0	0	0	0
PGAP1	1	0	0	0	6
ANKRD44	2	0	21	1	0
SF3B1	0	0	22	0	0
COQ10B	1	0	0	14	0
HSPD1	0	0	22	0	0
HSPE1	0	0	22	0	0
MOB4	2	0	11	7	2
RFTN2	1	0	0	0	1
MARS2	NA	0	0	0	0
BOLL	NA	0	0	0	0
PLCL1	1	0	0	1	0
SATB2	NA	0	0	0	0
C2orf69	NA	0	0	0	0
TYW5	NA	0	0	0	0
MAIP1	1	0	0	0	4
SPATS2L	3	0	0	2	2
KCTD18	NA	0	0	0	0
AOX1	NA	0	0	0	0
BZW1	2	0	20	2	0
CLK1	2	0	16	6	0
PPIL3	1	0	0	1	0
NIF3L1	1	0	0	1	0
ORC2	NA	0	0	0	0
NDUFB3	2	0	15	4	2
CFLAR	2	0	17	5	0
CASP10	1	0	0	1	0
CASP8	2	0	9	6	3
TRAK2	NA	0	0	0	0
STRADB	NA	0	0	0	0
TMEM237	NA	0	0	0	0
MPP4	NA	0	0	0	0
ALS2	NA	0	0	0	0
CDK15	NA	0	0	0	0
FZD7	NA	0	0	0	0
SUMO1	2	0	19	3	0
NOP58	2	0	20	2	0
BMPR2	3	0	0	2	2
FAM117B	1	0	0	1	0
WDR12	1	0	0	1	0
CARF	NA	0	0	0	0
NBEAL1	3	0	0	2	1
CYP20A1	1	0	0	3	0
ABI2	NA	0	0	0	0
RAPH1	NA	0	0	0	0
CD28	2	0	6	1	0
CTLA4	2	0	2	4	0
ICOS	2	0	5	3	0
PARD3B	1	0	0	0	1
NRP2	2	0	1	4	0
INO80D	1	0	0	2	0
[truncated: 10,007 more rows]
