# Supplementary material for: Cross-species comparison of single-cell landscapes reveals conservation and innovation in chicken immune systems
Source: Research Square preprint supplement (doi:10.21203/rs.3.rs-6164369/v1), 2025-03-20
Supplement: Supplementary file 3 [file 5db4f32f45e2f3d7f0dc57d6.xlsx]

## Sheet: Sheet1
Supplementary Table 4: Differentially expressed genes in chicken and human pDCs.
Gene name	Up-regulated or down-regulated in chicken
DPY30	up-regulated
TFIP11	up-regulated
GLT1D1	up-regulated
PDCL3	up-regulated
CLK4	up-regulated
GALNT3	up-regulated
MYO9B	up-regulated
DAZAP1	up-regulated
EP300	up-regulated
MITF	up-regulated
C15orf48	up-regulated
IGF2BP3	up-regulated
C2orf49	up-regulated
ZEB1	up-regulated
DCLK3	up-regulated
USP47	up-regulated
SOD2	up-regulated
CYTH1	up-regulated
EPN2	up-regulated
STK16	up-regulated
GDA	up-regulated
MRPL45	up-regulated
BAK1	up-regulated
AP3S2	up-regulated
TET3	up-regulated
TMEM39A	up-regulated
SRPK1	up-regulated
YEATS4	up-regulated
MRPL1	up-regulated
SLC25A14	up-regulated
RPS6KA5	up-regulated
ELOVL5	up-regulated
ARL4A	up-regulated
HERC2	up-regulated
RUNX3	up-regulated
SLK	up-regulated
STK26	up-regulated
EIF4G3	up-regulated
PIK3R5	up-regulated
ACSBG2	up-regulated
ATL2	up-regulated
ACBD3	up-regulated
PRDM2	up-regulated
TRAF5	up-regulated
CST7	up-regulated
RAPGEF6	up-regulated
ARHGEF9	up-regulated
PPIL1	up-regulated
ABR	up-regulated
NCOR2	up-regulated
AP3M2	up-regulated
PSMG4	up-regulated
BCL2L10	up-regulated
ST8SIA4	up-regulated
RNF217	up-regulated
GPN2	up-regulated
COQ9	up-regulated
NELFE	up-regulated
HYOU1	up-regulated
PLXNA1	up-regulated
LLGL2	up-regulated
PLIN2	up-regulated
CPEB3	up-regulated
SAMSN1	up-regulated
SPZ1	up-regulated
MAFK	up-regulated
ALCAM	up-regulated
SBNO2	up-regulated
SLC6A6	up-regulated
PIK3CB	up-regulated
EMC8	up-regulated
GSTM4	up-regulated
CNOT1	up-regulated
SNX25	up-regulated
CDK17	up-regulated
TRIP12	up-regulated
RGL1	up-regulated
ACADL	up-regulated
PRDX4	up-regulated
LSM12	up-regulated
ARIH1	up-regulated
DAPP1	up-regulated
KDM4B	up-regulated
UBN2	up-regulated
TM6SF1	up-regulated
NUP88	up-regulated
LEMD2	up-regulated
EPHA4	up-regulated
IMMT	up-regulated
MARK3	up-regulated
PICALM	up-regulated
SELENOP	up-regulated
TSN	up-regulated
GMFB	up-regulated
PRR5	up-regulated
FKBP4	up-regulated
SF3A3	up-regulated
FUBP1	up-regulated
ATP10A	up-regulated
ACO2	up-regulated
BCAP29	up-regulated
ALYREF	up-regulated
NEK6	up-regulated
HEXIM1	up-regulated
ACSF2	up-regulated
TAGAP	up-regulated
GDF9	up-regulated
TRAF2	up-regulated
MOB1B	up-regulated
MILR1	up-regulated
TMEM140	up-regulated
CSTA	up-regulated
OSBPL10	up-regulated
NUAK1	up-regulated
SEPTIN7	up-regulated
ASXL2	up-regulated
TOR1AIP1	up-regulated
RDX	up-regulated
PACSIN3	up-regulated
BCKDK	up-regulated
MRTO4	up-regulated
SIRT2	up-regulated
NGFR	up-regulated
TMED7	up-regulated
FYN	up-regulated
CREBBP	up-regulated
PMVK	up-regulated
SGK1	up-regulated
SNX13	up-regulated
SNCAIP	up-regulated
RABGEF1	up-regulated
P2RY8	up-regulated
HSPA2	up-regulated
LAMTOR3	up-regulated
EIF2S1	up-regulated
RAB20	up-regulated
SPAG9	up-regulated
JAK2	up-regulated
NSMF	up-regulated
SUSD6	up-regulated
HYPK	up-regulated
ZNF593	up-regulated
GNS	up-regulated
WIPI2	up-regulated
FDFT1	up-regulated
RAB11FIP4	up-regulated
NF1	up-regulated
GLIPR2	up-regulated
TEX2	up-regulated
NELFCD	up-regulated
XXYLT1	up-regulated
DND1	up-regulated
ANKRD17	up-regulated
ATXN7	up-regulated
CHN2	up-regulated
FAM78A	up-regulated
CCNK	up-regulated
RNF150	up-regulated
DNMT3A	up-regulated
IL18	up-regulated
NKAP	up-regulated
BAG3	up-regulated
ZCCHC10	up-regulated
SLC30A7	up-regulated
PSMD12	up-regulated
NET1	up-regulated
UBE2Q2	up-regulated
SURF4	up-regulated
GIGYF2	up-regulated
CMKLR1	up-regulated
ECHDC3	up-regulated
SIK2	up-regulated
HMBOX1	up-regulated
CUL3	up-regulated
CCT6B	up-regulated
NFATC3	up-regulated
YPEL1	up-regulated
NR1D2	up-regulated
JAGN1	up-regulated
SAYSD1	up-regulated
GNG2	up-regulated
HSD17B7	up-regulated
RASGEF1A	up-regulated
TRANK1	up-regulated
TEX14	up-regulated
TMEM263	up-regulated
HIPK3	up-regulated
SREBF2	up-regulated
CSRNP1	up-regulated
ELL	up-regulated
DOCK4	up-regulated
CHST2	up-regulated
WDR26	up-regulated
NR4A3	up-regulated
ZC3H12C	up-regulated
GPR18	up-regulated
PLS3	up-regulated
IL10RB	up-regulated
WWOX	up-regulated
PLOD2	up-regulated
NIPA2	up-regulated
RGS18	up-regulated
LFNG	up-regulated
GSK3B	up-regulated
GNA13	up-regulated
B4GALT4	up-regulated
NAA40	up-regulated
PANK3	up-regulated
FUT8	up-regulated
TREML2	up-regulated
PPP4R1	up-regulated
ABI3	up-regulated
TWSG1	up-regulated
UPF1	up-regulated
MICOS13	up-regulated
CCR7	up-regulated
BCL2A1	up-regulated
PLXND1	up-regulated
INTS5	up-regulated
SLC25A24	up-regulated
TRIP11	up-regulated
GLCCI1	up-regulated
DUSP23	up-regulated
NDE1	up-regulated
UCHL3	up-regulated
HMGCR	up-regulated
PPARD	up-regulated
STK10	up-regulated
HDDC2	up-regulated
PAQR7	up-regulated
INPPL1	up-regulated
VPS35	up-regulated
PSMD9	up-regulated
GFPT1	up-regulated
HMOX1	up-regulated
KPNA4	up-regulated
DTX2	up-regulated
MAN1A1	up-regulated
STARD8	up-regulated
IP6K2	up-regulated
SEC16A	up-regulated
TMBIM1	up-regulated
HTR4	up-regulated
EIF2B4	up-regulated
MRAS	up-regulated
METTL14	up-regulated
PM20D1	up-regulated
XPO6	up-regulated
SYNE3	up-regulated
FMR1	up-regulated
KDM7A	up-regulated
PPP3CB	up-regulated
GTF2H1	up-regulated
NAMPT	up-regulated
WBP2NL	up-regulated
GFOD1	up-regulated
IRAK2	up-regulated
AMFR	up-regulated
ETV3	up-regulated
CHD7	up-regulated
TNRC6A	up-regulated
THUMPD3	up-regulated
RCHY1	up-regulated
CALCB	up-regulated
PPP3R1	up-regulated
TACC3	up-regulated
STIM2	up-regulated
SPI1	up-regulated
DYNC1LI1	up-regulated
SPTY2D1	up-regulated
TAP2	up-regulated
GNAI1	up-regulated
EGFR	up-regulated
MAML1	up-regulated
SESN1	up-regulated
MED7	up-regulated
RAB6A	up-regulated
DOK1	up-regulated
PGAP1	up-regulated
FSCN1	up-regulated
SH3BP5	up-regulated
TRIM66	up-regulated
PDLIM4	up-regulated
NAAA	up-regulated
KCNA3	up-regulated
TGFBRAP1	up-regulated
FAHD2A	up-regulated
ZDHHC20	up-regulated
TMEM181	up-regulated
PFDN1	up-regulated
BOD1L1	up-regulated
BLCAP	up-regulated
GNE	up-regulated
CEP85L	up-regulated
SKI	up-regulated
DEGS1	up-regulated
ARFIP1	up-regulated
PLSCR1	up-regulated
BORCS6	up-regulated
PPP1R36	up-regulated
PHF2	up-regulated
RFC1	up-regulated
ABCC5	up-regulated
TXNRD1	up-regulated
UBE2H	up-regulated
CWC22	up-regulated
ARSG	up-regulated
IER5	up-regulated
NCOA1	up-regulated
SLC43A2	up-regulated
NUDT16L1	up-regulated
FBP1	up-regulated
FUCA1	up-regulated
SOCS1	up-regulated
ZBTB10	up-regulated
HTRA1	up-regulated
ATP2B4	up-regulated
IST1	up-regulated
STAU1	up-regulated
PHLDA2	up-regulated
FKBP15	up-regulated
BZW2	up-regulated
TST	up-regulated
NMRK2	up-regulated
PDXDC1	up-regulated
FBXW7	up-regulated
NFS1	up-regulated
UNC50	up-regulated
INTS13	up-regulated
OSBPL9	up-regulated
SLC25A36	up-regulated
MBNL3	up-regulated
POLH	up-regulated
IFT27	up-regulated
RIC8B	up-regulated
MAN1B1	up-regulated
SP3	up-regulated
DDX1	up-regulated
AZIN1	up-regulated
VPS54	up-regulated
GLS	up-regulated
RNF139	up-regulated
SPP2	up-regulated
SHPK	up-regulated
RAPGEF2	up-regulated
NAV3	up-regulated
MAP1LC3A	up-regulated
BICD2	up-regulated
SLC41A1	up-regulated
PAXBP1	up-regulated
ANKRD13A	up-regulated
C16orf87	up-regulated
SDE2	up-regulated
SUCO	up-regulated
TAB3	up-regulated
UPRT	up-regulated
ATP6V0A1	up-regulated
PALD1	up-regulated
SPSB1	up-regulated
GORASP2	up-regulated
TBC1D15	up-regulated
LYZ	up-regulated
MGAT3	up-regulated
STAM2	up-regulated
PIK3R1	up-regulated
EBNA1BP2	up-regulated
CIAPIN1	up-regulated
PTPRJ	up-regulated
TET1	up-regulated
PTRH2	up-regulated
MRPS25	up-regulated
RAP2C	up-regulated
MXD1	up-regulated
LDLRAD1	up-regulated
SHTN1	up-regulated
SNX12	up-regulated
MRPL42	up-regulated
MANBA	up-regulated
ABCC1	up-regulated
ATRNL1	up-regulated
IGF2R	up-regulated
UBE2V1	up-regulated
NHSL2	up-regulated
LARP4	up-regulated
HMGCS1	up-regulated
GAK	up-regulated
PSPC1	up-regulated
ALB	up-regulated
IDE	up-regulated
ACTN1	up-regulated
CYB5A	up-regulated
R3HDM1	up-regulated
NCOA7	up-regulated
JDP2	up-regulated
POU2F1	up-regulated
PMP22	up-regulated
PIK3R6	up-regulated
GALNT1	up-regulated
SBNO1	up-regulated
RBIS	up-regulated
GNA12	up-regulated
ARCN1	up-regulated
LIMK1	up-regulated
MECR	up-regulated
SEC24A	up-regulated
TRAFD1	up-regulated
PGS1	up-regulated
BMP2K	up-regulated
NME1	up-regulated
FKBP11	up-regulated
BHLHE41	up-regulated
SMAP2	up-regulated
ZBTB46	up-regulated
BRAF	up-regulated
PCSK7	up-regulated
LY96	up-regulated
RALBP1	up-regulated
SIK1	up-regulated
ARL5A	up-regulated
NDEL1	up-regulated
EVL	up-regulated
CFD	up-regulated
ACSL4	up-regulated
CH25H	up-regulated
BRWD1	up-regulated
AS3MT	up-regulated
AGO3	up-regulated
DNASE2B	up-regulated
B3GNT2	up-regulated
CKAP4	up-regulated
HOPX	up-regulated
PDE3B	up-regulated
UCK2	up-regulated
PSPH	up-regulated
OAT	up-regulated
MLXIP	up-regulated
RLF	up-regulated
HMCES	up-regulated
CCDC25	up-regulated
STT3A	up-regulated
OTUD1	up-regulated
HIVEP1	up-regulated
EIF4EBP2	up-regulated
FGL2	up-regulated
MACF1	up-regulated
SEC24D	up-regulated
MATK	up-regulated
ILRUN	up-regulated
TRIO	up-regulated
ATXN7L1	up-regulated
ID3	up-regulated
MATR3	up-regulated
SVBP	up-regulated
CAPN3	up-regulated
AP1G1	up-regulated
ENPP4	up-regulated
MID1IP1	up-regulated
TPD52L2	up-regulated
ARL1	up-regulated
PTK2B	up-regulated
EIF3B	up-regulated
MSN	up-regulated
DUSP7	up-regulated
MCRS1	up-regulated
RC3H1	up-regulated
RAB8B	up-regulated
MED29	up-regulated
MRPS14	up-regulated
PHLPP2	up-regulated
DIAPH2	up-regulated
BASP1	up-regulated
MAP3K5	up-regulated
SLC23A2	up-regulated
CRYM	up-regulated
VPS26A	up-regulated
NR1H3	up-regulated
FUBP3	up-regulated
ZNF704	up-regulated
NFATC1	up-regulated
ACAT1	up-regulated
SYNGR3	up-regulated
PLK3	up-regulated
CMIP	up-regulated
UBE2F	up-regulated
FBXO22	up-regulated
RBM33	up-regulated
THYN1	up-regulated
SEPTIN6	up-regulated
PGRMC2	up-regulated
PSMC2	up-regulated
TBC1D5	up-regulated
DNAJA4	up-regulated
EZH2	up-regulated
RBM24	up-regulated
MYO1C	up-regulated
MRPL24	up-regulated
ATP1B1	up-regulated
SGPL1	up-regulated
AFG3L2	up-regulated
SWAP70	up-regulated
MGST3	up-regulated
MRPL12	up-regulated
SLC25A16	up-regulated
YEATS2	up-regulated
FGG	up-regulated
ABCA1	up-regulated
CSF1	up-regulated
TIPARP	up-regulated
FNIP1	up-regulated
MGAT5	up-regulated
SCIN	up-regulated
CKB	up-regulated
COPG1	up-regulated
RNF34	up-regulated
MRPS17	up-regulated
MACO1	up-regulated
NCF2	up-regulated
CIAO3	up-regulated
EFHD1	up-regulated
GPI	up-regulated
SPOPL	up-regulated
ANKRD28	up-regulated
ADORA2A	up-regulated
RAB41	up-regulated
TRAF3	up-regulated
USP10	up-regulated
STAT4	up-regulated
FKBP14	up-regulated
SFSWAP	up-regulated
NRIP1	up-regulated
ETS2	up-regulated
ZNF318	up-regulated
FGB	up-regulated
TCF12	up-regulated
ATP7A	up-regulated
CCNG2	up-regulated
NECAP2	up-regulated
FBRSL1	up-regulated
HSPA4	up-regulated
ANTXR2	up-regulated
NIBAN1	up-regulated
PLXNC1	up-regulated
SNX10	up-regulated
NRAS	up-regulated
MGAT5B	up-regulated
PPTC7	up-regulated
HDAC9	up-regulated
NYX	up-regulated
RAB21	up-regulated
CRY1	up-regulated
PDRG1	up-regulated
MPC1	up-regulated
PIM1	up-regulated
GOLGA1	up-regulated
DYRK2	up-regulated
ABCD2	up-regulated
EMP1	up-regulated
ACTR6	up-regulated
PFN2	up-regulated
AGO4	up-regulated
ASPH	up-regulated
RRAS2	up-regulated
SRP68	up-regulated
PITPNA	up-regulated
LSMEM1	up-regulated
MAPK14	up-regulated
PRR14L	up-regulated
MTHFD2	up-regulated
CCNL2	up-regulated
TRPV2	up-regulated
CBLB	up-regulated
ANXA6	up-regulated
UBE2L5	up-regulated
MORC3	up-regulated
MFSD2A	up-regulated
ZC3H12A	up-regulated
AKTIP	up-regulated
FMC1	up-regulated
PDE8A	up-regulated
ZNF516	up-regulated
GGPS1	up-regulated
LARP1	up-regulated
SDC4	up-regulated
ITGAV	up-regulated
BEST1	up-regulated
ARHGEF3	up-regulated
PRELID3B	up-regulated
EGLN1	up-regulated
HELZ2	up-regulated
CHUK	up-regulated
PDPK1	up-regulated
GPN3	up-regulated
MPP1	up-regulated
STARD3NL	up-regulated
ST3GAL6	up-regulated
CTBP1	up-regulated
BEND7	up-regulated
USP25	up-regulated
EIF5A2	up-regulated
CEP83	up-regulated
FAM168B	up-regulated
CYB561D2	up-regulated
MYO5A	up-regulated
REV1	up-regulated
SPEN	up-regulated
GALC	up-regulated
TBKBP1	up-regulated
PAK3	up-regulated
TGFBR1	up-regulated
RGCC	up-regulated
SZRD1	up-regulated
CDC26	up-regulated
VPS33B	up-regulated
HEXB	up-regulated
GALM	up-regulated
PLEKHA1	up-regulated
KLF12	up-regulated
LAT2	up-regulated
PFKFB3	up-regulated
IPMK	up-regulated
SPECC1	up-regulated
GOLGA5	up-regulated
TXNDC5	up-regulated
CRYGN	up-regulated
PER2	up-regulated
MCRIP1	up-regulated
ICOSLG	up-regulated
ADRB2	up-regulated
DEF6	up-regulated
TYSND1	up-regulated
U2AF1	up-regulated
NMT2	up-regulated
SLC4A7	up-regulated
SGMS1	up-regulated
DKC1	up-regulated
ZNRF2	up-regulated
PRPSAP1	up-regulated
RIOK3	up-regulated
SEC22B	up-regulated
LRRC10B	up-regulated
PPT1	up-regulated
RP2	up-regulated
RXFP1	up-regulated
NANP	up-regulated
KAT2A	up-regulated
MFSD1	up-regulated
LEMD3	up-regulated
CHKA	up-regulated
RAB31	up-regulated
OASL	up-regulated
EHBP1	up-regulated
FAF2	up-regulated
DOT1L	up-regulated
EIF2AK3	up-regulated
PSME4	up-regulated
TFG	up-regulated
PSMD14	up-regulated
MRPL44	up-regulated
TMEM154	up-regulated
ETF1	up-regulated
UBE4A	up-regulated
CASP3	up-regulated
SEL1L	up-regulated
UBE2G2	up-regulated
CUL1	up-regulated
KIAA0040	up-regulated
DDX55	up-regulated
PKN2	up-regulated
GOLGA7	up-regulated
DALRD3	up-regulated
CPNE8	up-regulated
SLC25A25	up-regulated
GAPVD1	up-regulated
PHRF1	up-regulated
SAP30L	up-regulated
TBC1D4	up-regulated
FOSL2	up-regulated
HPD	up-regulated
MYLIP	up-regulated
NBEAL2	up-regulated
NUP98	up-regulated
BDH1	up-regulated
COTL1	up-regulated
PECAM1	up-regulated
NOCT	up-regulated
CBFB	up-regulated
EBAG9	up-regulated
COMMD4	up-regulated
AFF2	up-regulated
TMEM65	up-regulated
VCPKMT	up-regulated
SCFD2	up-regulated
ATP6V1B2	up-regulated
PLCG2	up-regulated
SHISA6	up-regulated
TTR	up-regulated
NUS1	up-regulated
DNAJA2	up-regulated
ANKRD39	up-regulated
SCPEP1	up-regulated
TOMM6	up-regulated
ACAD9	up-regulated
GMPPB	up-regulated
INHBA	up-regulated
ZFP91	up-regulated
B3GALNT1	up-regulated
MAPK6	up-regulated
HIVEP2	up-regulated
ATAD2	up-regulated
PYGL	up-regulated
MICOS10	up-regulated
FOXO4	up-regulated
FAM136A	up-regulated
AKAP1	up-regulated
SLC16A6	up-regulated
UBL3	up-regulated
DIP2B	up-regulated
DENND1B	up-regulated
GTPBP4	up-regulated
FLT3	up-regulated
UTP3	up-regulated
KMT5B	up-regulated
ARRDC3	up-regulated
STX12	up-regulated
HOMER1	up-regulated
CREG1	up-regulated
DENND3	up-regulated
LATS1	up-regulated
RHOB	up-regulated
GNPNAT1	up-regulated
SAP30	up-regulated
XPA	up-regulated
RNF144B	up-regulated
CLU	up-regulated
GNPTAB	up-regulated
GPR34	up-regulated
LPAR5	up-regulated
IFI30	up-regulated
EEF1E1	up-regulated
HK2	up-regulated
MRPL2	up-regulated
COPS8	up-regulated
METRNL	up-regulated
SIL1	up-regulated
PPIF	up-regulated
EHD3	up-regulated
IPO7	up-regulated
JARID2	up-regulated
RBM22	up-regulated
USP34	up-regulated
SLC16A3	up-regulated
APLP2	up-regulated
JAM2	up-regulated
HMGCL	up-regulated
MSI2	up-regulated
LTF	up-regulated
FAM32A	up-regulated
PAFAH1B2	up-regulated
ETS1	up-regulated
PIGS	up-regulated
GLYR1	up-regulated
KRR1	up-regulated
TMEM138	up-regulated
TNIP2	up-regulated
TMEM131	up-regulated
MON2	up-regulated
PARL	up-regulated
TMEM116	up-regulated
HIF1A	up-regulated
TRAF1	up-regulated
AP3D1	up-regulated
EDEM1	up-regulated
C21orf91	up-regulated
CAMK1D	up-regulated
HYKK	up-regulated
TNRC6C	up-regulated
ITM2A	up-regulated
MED9	up-regulated
FBXW11	up-regulated
SURF6	up-regulated
MFSD12	up-regulated
CTDSPL	up-regulated
MRPS2	up-regulated
RILP	up-regulated
OTOGL	up-regulated
ARID4A	up-regulated
NMI	up-regulated
IFI35	up-regulated
RGS9	up-regulated
B4GALT7	up-regulated
RAB30	up-regulated
SLC30A5	up-regulated
TCF3	up-regulated
UBQLN1	up-regulated
TXNDC11	up-regulated
BACH1	up-regulated
PPP2R2D	up-regulated
PSMD1	up-regulated
UBA5	up-regulated
NOL9	up-regulated
LPAR6	up-regulated
ARHGEF6	up-regulated
LRRFIP2	up-regulated
NCALD	up-regulated
PPP1R16B	up-regulated
GAS7	up-regulated
SLC45A3	up-regulated
MTSS1	up-regulated
IER3IP1	up-regulated
DYRK1A	up-regulated
HTRA2	up-regulated
PPFIA1	up-regulated
MYO1F	up-regulated
DNAJB12	up-regulated
SOWAHC	up-regulated
CORO7	up-regulated
PLPP5	up-regulated
CSRP2	up-regulated
ZMIZ1	up-regulated
DAP	up-regulated
ADIPOR2	up-regulated
ANKIB1	up-regulated
ZFHX3	up-regulated
SLC9A8	up-regulated
CITED4	up-regulated
GPX3	up-regulated
YBX3	up-regulated
NNT	up-regulated
UCHL5	up-regulated
HPS5	up-regulated
HIVEP3	up-regulated
TIMP2	up-regulated
CEP152	up-regulated
UBR2	up-regulated
PPIE	up-regulated
MAP7D3	up-regulated
CERS2	up-regulated
BLOC1S6	up-regulated
YIPF5	up-regulated
DIS3L	up-regulated
HDGF	up-regulated
ZNF326	up-regulated
CTSH	up-regulated
PPP2R5E	up-regulated
DERL1	up-regulated
ATP6V1D	up-regulated
ALDOB	up-regulated
CDC5L	up-regulated
APOA1	up-regulated
CLIC2	up-regulated
HES4	up-regulated
ZNFX1	up-regulated
KLF10	up-regulated
PSME3	up-regulated
WNK1	up-regulated
LARP4B	up-regulated
PPA1	up-regulated
TFPI2	up-regulated
COA3	up-regulated
UAP1	up-regulated
ECI1	up-regulated
STK38	up-regulated
ATP2A2	up-regulated
ATIC	up-regulated
PAM16	up-regulated
RASA3	up-regulated
TENT5A	up-regulated
ITPRIP	up-regulated
UBE2Q1	up-regulated
NDFIP1	up-regulated
RAB43	up-regulated
IWS1	up-regulated
TMF1	up-regulated
DAPK1	up-regulated
VAV3	up-regulated
ARHGAP22	up-regulated
PRKCA	up-regulated
TRIB2	up-regulated
SRF	up-regulated
SMARCE1	up-regulated
URM1	up-regulated
SAR1B	up-regulated
ATP2B1	up-regulated
TOB1	up-regulated
EEF1G	up-regulated
SLC16A10	up-regulated
DNAJC13	up-regulated
ZNRF1	up-regulated
UBE2J2	up-regulated
GNL2	up-regulated
USP3	up-regulated
MAMLD1	up-regulated
ATRN	up-regulated
PUM1	up-regulated
KLHL24	up-regulated
RPS6KB1	up-regulated
EXOC6	up-regulated
SLC39A6	up-regulated
ACTN4	down-regulated
TKT	down-regulated
HSPB1	down-regulated
COX7A2L	down-regulated
NAPRT	down-regulated
DECR1	down-regulated
NCF4	down-regulated
SLC7A6	down-regulated
C9orf78	down-regulated
HERPUD2	down-regulated
NHLRC3	down-regulated
HSD17B10	down-regulated
G3BP1	down-regulated
DDB1	down-regulated
SIDT1	down-regulated
TLN1	down-regulated
CHORDC1	down-regulated
DTNBP1	down-regulated
IMP4	down-regulated
CHD9	down-regulated
OSBPL8	down-regulated
PPCS	down-regulated
RRP7A	down-regulated
OAZ2	down-regulated
SERPINF1	down-regulated
ATXN10	down-regulated
ECH1	down-regulated
MAPKAPK2	down-regulated
LHFPL2	down-regulated
TMEM19	down-regulated
HOOK3	down-regulated
ITM2B	down-regulated
CAND1	down-regulated
NASP	down-regulated
BAZ1B	down-regulated
RELT	down-regulated
IMPDH2	down-regulated
LARP7	down-regulated
TERF2IP	down-regulated
INTS6	down-regulated
PHF20	down-regulated
CLTA	down-regulated
PDCD5	down-regulated
DGUOK	down-regulated
RBM17	down-regulated
NUDT1	down-regulated
SEL1L3	down-regulated
ZCRB1	down-regulated
ATP5MC1	down-regulated
TSPAN13	down-regulated
CCDC124	down-regulated
MFF	down-regulated
UFM1	down-regulated
ALG2	down-regulated
QDPR	down-regulated
HIKESHI	down-regulated
MZB1	down-regulated
FABP5	down-regulated
GCC2	down-regulated
TOR3A	down-regulated
PPM1K	down-regulated
SERPING1	down-regulated
RNF166	down-regulated
ADI1	down-regulated
CAMTA1	down-regulated
WDFY2	down-regulated
NDUFS4	down-regulated
TAF12	down-regulated
XRN2	down-regulated
ADAM19	down-regulated
PSMD11	down-regulated
MTMR14	down-regulated
TMEM59	down-regulated
SNX6	down-regulated
DDX18	down-regulated
POGZ	down-regulated
LSM4	down-regulated
HVCN1	down-regulated
TAF10	down-regulated
UPF3A	down-regulated
KDM5A	down-regulated
RASSF5	down-regulated
KDM2A	down-regulated
OFD1	down-regulated
ADGRG5	down-regulated
FERMT3	down-regulated
IL6R	down-regulated
GLG1	down-regulated
MIS18BP1	down-regulated
AKNA	down-regulated
CD99	down-regulated
CMTM3	down-regulated
LYSMD2	down-regulated
DHX15	down-regulated
DRAM2	down-regulated
NKTR	down-regulated
AP3B1	down-regulated
AHI1	down-regulated
SMC6	down-regulated
UBL7	down-regulated
RSU1	down-regulated
RBM38	down-regulated
DDX24	down-regulated
PHACTR1	down-regulated
RBM6	down-regulated
ARID5A	down-regulated
ATP1A1	down-regulated
PSMF1	down-regulated
NFE2L2	down-regulated
LMO4	down-regulated
PFKL	down-regulated
IDS	down-regulated
C6orf62	down-regulated
SSRP1	down-regulated
NCOA3	down-regulated
CHAF1A	down-regulated
MRPL41	down-regulated
EIF4E2	down-regulated
HRH2	down-regulated
YWHAH	down-regulated
PHYKPL	down-regulated
TMEM248	down-regulated
NDUFAF8	down-regulated
HAGH	down-regulated
CNDP2	down-regulated
YPEL5	down-regulated
TLK1	down-regulated
GPATCH8	down-regulated
HPS1	down-regulated
RNF7	down-regulated
DNAJB4	down-regulated
DPP7	down-regulated
TAF9	down-regulated
PLIN3	down-regulated
ISCU	down-regulated
GPATCH11	down-regulated
MYCL	down-regulated
ZBTB8OS	down-regulated
GPS1	down-regulated
RANBP1	down-regulated
OPN3	down-regulated
MAP1A	down-regulated
BCL7A	down-regulated
SPG7	down-regulated
GALNT2	down-regulated
ATP5PO	down-regulated
ORMDL1	down-regulated
SMCO4	down-regulated
SULF2	down-regulated
ADD1	down-regulated
PSMD2	down-regulated
NFAT5	down-regulated
BCAS2	down-regulated
RRAGC	down-regulated
NUDCD2	down-regulated
NUB1	down-regulated
CEBPZ	down-regulated
PPDPF	down-regulated
FAM107B	down-regulated
MCM5	down-regulated
SH2D3C	down-regulated
RABGGTB	down-regulated
UBE2K	down-regulated
PHPT1	down-regulated
PARVB	down-regulated
ABRACL	down-regulated
PIK3CD	down-regulated
AREG	down-regulated
AP2S1	down-regulated
TMEM259	down-regulated
MRPL9	down-regulated
ZFAND6	down-regulated
ARID2	down-regulated
SMG1	down-regulated
SLC25A39	down-regulated
ATG3	down-regulated
BLK	down-regulated
MAPK1IP1L	down-regulated
PIAS1	down-regulated
PYURF	down-regulated
FBXO7	down-regulated
CNOT2	down-regulated
MAN1A2	down-regulated
EPHB1	down-regulated
CDC40	down-regulated
NRROS	down-regulated
CKS2	down-regulated
SMAP1	down-regulated
MRPL22	down-regulated
BIN1	down-regulated
P2RY14	down-regulated
DNAJB11	down-regulated
PTDSS1	down-regulated
FKBP8	down-regulated
CCT7	down-regulated
ARHGDIB	down-regulated
EI24	down-regulated
PARVG	down-regulated
BUB3	down-regulated
PTTG1IP	down-regulated
NUTF2	down-regulated
CITED2	down-regulated
GRAMD1B	down-regulated
SIAH2	down-regulated
ATP11B	down-regulated
TMED3	down-regulated
HNRNPD	down-regulated
EIF4E	down-regulated
MKNK2	down-regulated
CCS	down-regulated
ADA2	down-regulated
EMB	down-regulated
ZFAND1	down-regulated
MAF1	down-regulated
TFAM	down-regulated
CHMP2A	down-regulated
C7orf50	down-regulated
UBN1	down-regulated
SCAMP4	down-regulated
WDR33	down-regulated
RNF126	down-regulated
NARF	down-regulated
SAMHD1	down-regulated
PTBP3	down-regulated
ATP13A2	down-regulated
TUT4	down-regulated
SNX18	down-regulated
COA4	down-regulated
SPOP	down-regulated
EFHD2	down-regulated
VPS4B	down-regulated
DAZAP2	down-regulated
PIP4K2A	down-regulated
SNX5	down-regulated
MAPKAPK3	down-regulated
CYSLTR1	down-regulated
NR4A1	down-regulated
ST6GALNAC4	down-regulated
PCNP	down-regulated
TLR7	down-regulated
SLC2A6	down-regulated
NOP53	down-regulated
BAZ2B	down-regulated
PRPF8	down-regulated
PSMD6	down-regulated
PLEKHB2	down-regulated
BIN2	down-regulated
TMEM50B	down-regulated
NUDC	down-regulated
NEK8	down-regulated
NCKAP1L	down-regulated
TMEM167A	down-regulated
SRP54	down-regulated
RAB4A	down-regulated
RNASEH2B	down-regulated
RBBP7	down-regulated
NCOR1	down-regulated
SNRNP25	down-regulated
SMPD3	down-regulated
NRDC	down-regulated
C15orf39	down-regulated
MPLKIP	down-regulated
HSP90AB1	down-regulated
CCT3	down-regulated
PCMTD1	down-regulated
GTF2B	down-regulated
PMPCB	down-regulated
LSM8	down-regulated
DRD4	down-regulated
YTHDF2	down-regulated
TCEA1	down-regulated
MRPS36	down-regulated
ID2	down-regulated
TRIM28	down-regulated
DDX21	down-regulated
HADHB	down-regulated
ADAR	down-regulated
NSMCE1	down-regulated
PLXNB2	down-regulated
P2RX1	down-regulated
METAP2	down-regulated
ST3GAL4	down-regulated
DCPS	down-regulated
SHOC2	down-regulated
RHOG	down-regulated
CDC37	down-regulated
GNG7	down-regulated
PDE4B	down-regulated
MAPRE2	down-regulated
RAB11FIP1	down-regulated
ADIPOR1	down-regulated
SNF8	down-regulated
SBDS	down-regulated
TMEM243	down-regulated
ZNF106	down-regulated
RNPS1	down-regulated
IL10RA	down-regulated
NOL7	down-regulated
ERO1B	down-regulated
PRMT9	down-regulated
CCDC69	down-regulated
ARL6IP4	down-regulated
OTUB1	down-regulated
ACAP2	down-regulated
SYPL1	down-regulated
PPP4R2	down-regulated
FNTA	down-regulated
DCXR	down-regulated
ACP1	down-regulated
TATDN3	down-regulated
ZMYM2	down-regulated
CYBC1	down-regulated
GTF2I	down-regulated
TRAF3IP3	down-regulated
CAT	down-regulated
RNF10	down-regulated
NONO	down-regulated
CPNE1	down-regulated
ITCH	down-regulated
ARPC5L	down-regulated
MBP	down-regulated
NREP	down-regulated
ALG5	down-regulated
MESD	down-regulated
CFLAR	down-regulated
PTPMT1	down-regulated
AGPAT5	down-regulated
CSTB	down-regulated
PLEKHJ1	down-regulated
TMEM50A	down-regulated
GTF2E2	down-regulated
EIF4H	down-regulated
TTC14	down-regulated
LAP3	down-regulated
PPM1G	down-regulated
NMT1	down-regulated
HADHA	down-regulated
XRCC5	down-regulated
CFDP1	down-regulated
IMP3	down-regulated
ATG12	down-regulated
RNMT	down-regulated
VMA21	down-regulated
UBALD2	down-regulated
PCBP2	down-regulated
HAX1	down-regulated
PREX1	down-regulated
TPRKB	down-regulated
COQ4	down-regulated
WIPF1	down-regulated
MMADHC	down-regulated
SNRPB2	down-regulated
ADPGK	down-regulated
ERICH1	down-regulated
UBE3A	down-regulated
SNRNP200	down-regulated
TOP2B	down-regulated
TXN2	down-regulated
TOLLIP	down-regulated
DEK	down-regulated
SFT2D2	down-regulated
TRAPPC3	down-regulated
CERS6	down-regulated
ELOB	down-regulated
RSF1	down-regulated
AKR1A1	down-regulated
MORF4L1	down-regulated
RSL1D1	down-regulated
TPR	down-regulated
GAS6	down-regulated
ACTG1	down-regulated
MIEN1	down-regulated
CYFIP2	down-regulated
PRCC	down-regulated
MAP7D1	down-regulated
SIVA1	down-regulated
CD3E	down-regulated
APRT	down-regulated
SELENOT	down-regulated
TMEM208	down-regulated
KTN1	down-regulated
BAIAP2	down-regulated
NUDT21	down-regulated
YIPF3	down-regulated
ARID1A	down-regulated
PPP1R7	down-regulated
COMT	down-regulated
ZFAT	down-regulated
C1orf43	down-regulated
LTA4H	down-regulated
TMEM63A	down-regulated
MEF2C	down-regulated
LBR	down-regulated
CBFA2T3	down-regulated
RAP1GDS1	down-regulated
AFF3	down-regulated
IQGAP2	down-regulated
COBLL1	down-regulated
VAMP2	down-regulated
UGCG	down-regulated
EIF6	down-regulated
CCDC59	down-regulated
MDFIC	down-regulated
MNAT1	down-regulated
ADD3	down-regulated
NUBP2	down-regulated
SETD2	down-regulated
DCK	down-regulated
METTL23	down-regulated
CTNNBL1	down-regulated
ECHDC1	down-regulated
SMARCC1	down-regulated
PTRHD1	down-regulated
NAXE	down-regulated
CD4	down-regulated
DOCK2	down-regulated
IRF1	down-regulated
PTPRE	down-regulated
SOX4	down-regulated
C5orf24	down-regulated
TSPAN3	down-regulated
RHOF	down-regulated
DUSP22	down-regulated
NRP1	down-regulated
UBE2E3	down-regulated
TAF7	down-regulated
CLN8	down-regulated
SMIM3	down-regulated
GPX7	down-regulated
ARHGEF7	down-regulated
ARHGAP30	down-regulated
CIB2	down-regulated
EPHA2	down-regulated
LYPLA1	down-regulated
RALY	down-regulated
LNPEP	down-regulated
CARD11	down-regulated
RMC1	down-regulated
DDX27	down-regulated
MRPS34	down-regulated
PLP2	down-regulated
COQ7	down-regulated
TAGLN2	down-regulated
CHMP5	down-regulated
DAP3	down-regulated
PAFAH1B1	down-regulated
UBE2I	down-regulated
OSTF1	down-regulated
PCMT1	down-regulated
CDKN1B	down-regulated
LDLRAD4	down-regulated
RPA2	down-regulated
SMARCB1	down-regulated
PHC3	down-regulated
CD36	down-regulated
XRCC6	down-regulated
SUPT5H	down-regulated
PAG1	down-regulated
CDK2AP2	down-regulated
B4GALT1	down-regulated
RNF145	down-regulated
CCDC186	down-regulated
TAP1	down-regulated
BNIP2	down-regulated
N4BP2	down-regulated
GTF3A	down-regulated
KRAS	down-regulated
ITSN2	down-regulated
ARL4C	down-regulated
BAG1	down-regulated
VPS36	down-regulated
TECR	down-regulated
EMC3	down-regulated
DCTN3	down-regulated
LPXN	down-regulated
PSMG2	down-regulated
LSM10	down-regulated
MYBL2	down-regulated
TUSC2	down-regulated
RGS19	down-regulated
TMEM230	down-regulated
AHCY	down-regulated
TMEM165	down-regulated
GRSF1	down-regulated
PSMC6	down-regulated
PBRM1	down-regulated
VAPA	down-regulated
NR3C1	down-regulated
ITGB7	down-regulated
C4orf48	down-regulated
CORO1B	down-regulated
TMPO	down-regulated
CHCHD7	down-regulated
PPP1CC	down-regulated
YY1	down-regulated
MAP4K1	down-regulated
CKS1B	down-regulated
ARPC5	down-regulated
ZDHHC4	down-regulated
VPS51	down-regulated
SYNGR2	down-regulated
STUB1	down-regulated
ILK	down-regulated
LEPROT	down-regulated
MRPS7	down-regulated
CUEDC2	down-regulated
MIIP	down-regulated
AP2M1	down-regulated
PPHLN1	down-regulated
MRPS33	down-regulated
PRPF6	down-regulated
EFCAB14	down-regulated
TMEM8B	down-regulated
DGKZ	down-regulated
SYNRG	down-regulated
SF3A2	down-regulated
SENP6	down-regulated
CGGBP1	down-regulated
HIGD1A	down-regulated
ABCE1	down-regulated
TWF2	down-regulated
PRKAR1A	down-regulated
AP1M1	down-regulated
TNNI2	down-regulated
CD7	down-regulated
COX20	down-regulated
KYNU	down-regulated
PPP2R5C	down-regulated
CAPG	down-regulated
CD2AP	down-regulated
MAD1L1	down-regulated
PSENEN	down-regulated
NAP1L4	down-regulated
OXR1	down-regulated
CAMLG	down-regulated
MTCH1	down-regulated
SETD5	down-regulated
DHTKD1	down-regulated
MPHOSPH8	down-regulated
SNX2	down-regulated
MTIF3	down-regulated
GRHPR	down-regulated
ATM	down-regulated
ODF2L	down-regulated
HNRNPUL1	down-regulated
ITM2C	down-regulated
DCAF7	down-regulated
NSD3	down-regulated
CISD2	down-regulated
TMEM183A	down-regulated
MAT2B	down-regulated
SRGN	down-regulated
VDAC1	down-regulated
CIR1	down-regulated
STAT6	down-regulated
CXXC5	down-regulated
ARMC10	down-regulated
S100A6	down-regulated
EPC1	down-regulated
OCIAD1	down-regulated
SH3TC1	down-regulated
CMTM6	down-regulated
SLC35C2	down-regulated
GOPC	down-regulated
UBE2B	down-regulated
SERPINF2	down-regulated
DYNC1I2	down-regulated
ATG101	down-regulated
CCNC	down-regulated
AIP	down-regulated
EXOSC5	down-regulated
EMC7	down-regulated
CTCF	down-regulated
RFXANK	down-regulated
ZRANB2	down-regulated
ADA	down-regulated
CCND3	down-regulated
S100A11	down-regulated
SRSF4	down-regulated
PDCD10	down-regulated
MED30	down-regulated
HMGB2	down-regulated
POLB	down-regulated
SSNA1	down-regulated
UFC1	down-regulated
PSME1	down-regulated
ATP5PF	down-regulated
PDCD2	down-regulated
EIF4G1	down-regulated
LSM7	down-regulated
IDH3A	down-regulated
NUP210	down-regulated
LAMP5	down-regulated
YWHAB	down-regulated
RNF213	down-regulated
SUCLG1	down-regulated
CLK1	down-regulated
ITGA4	down-regulated
KATNBL1	down-regulated
IRF4	down-regulated
INTS11	down-regulated
BLOC1S1	down-regulated
TMA16	down-regulated
ST3GAL2	down-regulated
MRPL18	down-regulated
GPR65	down-regulated
PTPRS	down-regulated
MYD88	down-regulated
PTPN1	down-regulated
NIFK	down-regulated
MRPL32	down-regulated
LSP1	down-regulated
PNRC2	down-regulated
TBCC	down-regulated
GLRX3	down-regulated
ARHGAP18	down-regulated
EIF1B	down-regulated
PTGDS	down-regulated
LSM6	down-regulated
MRPL3	down-regulated
EAPP	down-regulated
METTL9	down-regulated
S100A4	down-regulated
SDCBP	down-regulated
LRRK1	down-regulated
DDRGK1	down-regulated
CLIC3	down-regulated
RAP1B	down-regulated
PPM1B	down-regulated
PIK3CG	down-regulated
PACSIN1	down-regulated
SNAP23	down-regulated
SURF1	down-regulated
LSM5	down-regulated
GSTK1	down-regulated
FBXW5	down-regulated
MAP3K2	down-regulated
LEPROTL1	down-regulated
CLINT1	down-regulated
NIN	down-regulated
ATP6V1H	down-regulated
ORMDL2	down-regulated
SYK	down-regulated
SERPINB1	down-regulated
HINT2	down-regulated
SPG21	down-regulated
ITPA	down-regulated
IQGAP1	down-regulated
CNTRL	down-regulated
MRPS5	down-regulated
AGPAT2	down-regulated
APH1A	down-regulated
RWDD1	down-regulated
ENSA	down-regulated
NEMF	down-regulated
HADH	down-regulated
RPAIN	down-regulated
ESF1	down-regulated
LAMTOR1	down-regulated
TRAF4	down-regulated
ANAPC16	down-regulated
NGLY1	down-regulated
IAH1	down-regulated
SLC20A1	down-regulated
GADD45GIP1	down-regulated
CPNE3	down-regulated
PCM1	down-regulated
STRBP	down-regulated
EIF2A	down-regulated
SCARB2	down-regulated
IQSEC1	down-regulated
AEBP1	down-regulated
STK4	down-regulated
ELOF1	down-regulated
ADK	down-regulated
FGFR1OP2	down-regulated
HDAC2	down-regulated
ACAA1	down-regulated
TMEM109	down-regulated
DNAJB9	down-regulated
DCP2	down-regulated
SMU1	down-regulated
POLR1D	down-regulated
MOB1A	down-regulated
SPNS3	down-regulated
SH2B3	down-regulated
TCIRG1	down-regulated
COMMD3	down-regulated
ELF2	down-regulated
BANP	down-regulated
DUT	down-regulated
AP3S1	down-regulated
SNX3	down-regulated
MED28	down-regulated
STOML2	down-regulated
DR1	down-regulated
ANAPC5	down-regulated
CD48	down-regulated
CYLD	down-regulated
RHBDF2	down-regulated
SPON2	down-regulated
MGAT4A	down-regulated
CCNH	down-regulated
USP48	down-regulated
PHF14	down-regulated
EIF2AK4	down-regulated
C1orf35	down-regulated
TMX1	down-regulated
SAP30BP	down-regulated
NSRP1	down-regulated
SPSB3	down-regulated
UBA2	down-regulated
GGNBP2	down-regulated
IFNGR1	down-regulated
MRPL21	down-regulated
FAM162A	down-regulated
ORAI2	down-regulated
MLEC	down-regulated
NFX1	down-regulated
TMEM30A	down-regulated
PDS5A	down-regulated
OGA	down-regulated
PSMD13	down-regulated
RBM8A	down-regulated
AUP1	down-regulated
GSTO1	down-regulated
LSM1	down-regulated
RGS10	down-regulated
SHARPIN	down-regulated
SCAMP2	down-regulated
ZNHIT3	down-regulated
NDUFA9	down-regulated
RNF149	down-regulated
CNP	down-regulated
UNC119	down-regulated
CDC42SE2	down-regulated
GPM6B	down-regulated
RAD21	down-regulated
TM2D1	down-regulated
SNRPB	down-regulated
TTC17	down-regulated
POP5	down-regulated
PTP4A1	down-regulated
GTF3C6	down-regulated
SREK1	down-regulated
SF3B4	down-regulated
NUDT5	down-regulated
VOPP1	down-regulated
MIF4GD	down-regulated
TMEM141	down-regulated
BUD23	down-regulated
BCL11A	down-regulated
NUMA1	down-regulated
SETX	down-regulated
CBX5	down-regulated
RIPOR2	down-regulated
MAP4K4	down-regulated
FEZ2	down-regulated
SNRNP40	down-regulated
RNF13	down-regulated
SNRNP27	down-regulated
ETNK1	down-regulated
KHDRBS1	down-regulated
DCTN2	down-regulated
NME3	down-regulated
ETV6	down-regulated
VPS13C	down-regulated
HMGA1	down-regulated
IRAK4	down-regulated
TGFBI	down-regulated
CEP57	down-regulated
GABARAPL2	down-regulated
SCAF11	down-regulated
HNRNPL	down-regulated
PGD	down-regulated
MPG	down-regulated
GIT2	down-regulated
CCDC112	down-regulated
FDPS	down-regulated
NCOA4	down-regulated
NANS	down-regulated
DAAM1	down-regulated
SCNM1	down-regulated
AMD1	down-regulated
GGA2	down-regulated
PRMT7	down-regulated
TTC1	down-regulated
SUSD1	down-regulated
MAD2L2	down-regulated
TRIM8	down-regulated
PAK2	down-regulated
WASF2	down-regulated
PNPLA2	down-regulated
PNKD	down-regulated
SNX17	down-regulated
PFDN2	down-regulated
SHISA5	down-regulated

## Sheet: Sheet2
GO term analysis of the genes specifically expressed in chicken pDC
Term	Count	%	PValue
Host-virus interaction	57	6.34744	5.17565e-05
Human immunodeficiency virus 1 infection	25	2.78396	0.000319862
Kaposi sarcoma-associated herpesvirus infection	23	2.56125	0.000549607
Human cytomegalovirus infection	25	2.78396	0.000763897
Epstein-Barr virus infection	19	2.11581	0.0202088
Protein serine/threonine/tyrosine kinase activity	47	5.23385	2.0823e-07
Protein tyrosine kinase activity	14	1.55902	0.0021404
Platelet-derived growth factor receptor signaling pathway	7	0.77951	0.00235173
Platelet activation	10	1.11359	0.00302948
Platelet dense granule organization	6	0.668151	0.00573027
Platelet formation	5	0.556793	0.0100595
Myeloid leukocyte migration	3	0.334076	0.010813
