# Supplementary material for: Cross-species comparison of single-cell landscapes reveals conservation and innovation in chicken immune systems
Source: Research Square preprint supplement (doi:10.21203/rs.3.rs-6164369/v1), 2025-03-20
Supplement: Supplementary file 4 [file 5dc0d07bf0816887d6071b8a.xlsx]

## Sheet: sheet1
Supplementary Table1: A list of marker genes and corresponding references for the annotation of chicken cell types.
Tissue	Cell type_new	Marker gene	Reference
Adipocyte	Erythrocyte	HBA1,HBBA,HBAD	PMID: 35514346; 38287279; 34957119
	Platelet	ITGB3,GP9	PMID: 38287279; 37063767
	Macrophage	CSF1R,C1QB,C1QA	PMID: 33741943; 31892341
	Naive/activated T	CD3D,CD3E,TCF7,IL7R,CD44	PMID: 30479382; 21331226
	CD8+ CTL	CD3D,CD3E,CD8A,GZMA,GNLY,GZMM,GZMK	PMID: 38287279;35549406
	Fibroblast	COL1A1,COL1A2,COL3A1,DCN,POSTN	PMID: 34140509; 36646705; 33741943
	Fat cell progenitor	WT1,KLF5	PMID: 35372335;16054042
	Endothelial cell	PECAM1,VWF,CDH5	PMID: 36198871
	Smooth muscle cell	MYH11,MYLK	PMID: 36646705
	Adipocyte	PLIN1,ACSL1,G0S2	PMID: 31023895; 38902599; 33621367
	Neuron	NRXN3,NRXN1	PMID: 34879268;34140509
	Cycling CD8+T	MKI67,TOP2A,CD3D,CD3E,CD8A	PMID: 35310332;35549406
Adrenal gland	Erythrocyte	HBA1,HBBA,HBAD	PMID: 35514346; 38287279; 34957119
	Macrophage	CSF1R,C1QB,C1QA	PMID: 33741943; 31892341
	Myofibroblast	TAGLN,DCN,COL3A1,COL1A1	PMID: 35549404;34140509;36646705;33741943;39653186
	T cell	CD3D,CD3E,BCL11B	PMID: 35549406; 38287279
	Capsular cell	WT1	PMID: 33500353
	Zona glomerulosa cell	HSD3B1,AGTR1	PMID: 33500353; 34493726
	Zona fasciculata cells/zona reticularis cells	CYP11A1,AKR1B1,CYB5A	PMID: 38718896; 33934358
	Endothelial cell	VWF,FLT1	PMID: 36198871; 37537495
	Chromaffin cell	TH, CHGA	PMID: 38718896
	Schwann cell	SOX10,CDH19	PMID: 20457761; 33382200
Blood vessel	Erythrocyte	HBA1,HBBA,HBAD	PMID: 35514346; 38287279; 34957119
	Macrophage	CSF1R,C1QB,C1QA,MAFB	PMID: 33741943; 31892341; 27810926
	T cell	CD3D,CD3E,BCL11B	PMID: 35549406; 38287279
	Fibroblast	COL1A1,COL1A2,COL3A1, DCN,POSTN	PMID: 34140509; 36646705; 33741943
	Endothelial cell	PECAM1	PMID: 36198871
	Smooth muscle cell	MYH11, MYLK, ACTA2	PMID: 36646705; 34140509; 37189183
Bone marrow	Erythrocyte	HBA1,HBBA,HBAD	PMID: 35514346; 38287279; 34957119
	Platelet	ITGB3,GP9	PMID: 38287279; 37063767
	Macrophage	MARCO,C1QB,C1QA,HMOX1	PMID: 30348985; 31892341; 30348985
	DC1	IRF8,FLT3,WDFY4; NAAA	PMID: 32686767; 36685557; 30979687
	Classical monocyte	CD14,S100A12,TLR2A	PMID: 33545035; 37848421;30626692
	B cell	MZB1;EBF1;PAX5	PMID: 34385315; 34824268; 33352111
	T cell	CD3D,CD3E,BCL11B	PMID: 35549406; 38287279
	Eosinophil	DACH1,PIP5K1B,FRY	PMID: 38287279
Bone	Megakaryocyte Erythroid Progenitors(MEP)	KIT,LMO2,GATA2,FECH,TFRC	PMID: 35549310; 27526324; 37352261
	Promonocyte	SPINK2,CD14,S100A12,TLR2A	PMID: 35549310; 33545035; 37848421; 30626692
	Erythroblasts	HBA1,HBBA,HBAD,MKI67	PMID: 35514346; 38287279; 34957119
	Erythrocyte	HBA1,HBBA,HBAD	PMID: 35514346; 38287279; 34957119
	Platelet	ITGB3	PMID: 38287279
	Macrophage	MARCO,C1QB,C1QA,MAFB	PMID: 31892341; 30348985; 27810926
	DC1	IRF8,FLT3,WDFY4; NAAA	PMID: 32686767; 36685557; 30979687
	Cycling Promonocyte	SPINK2,TOP2A,MKI67,CD14,S100A12,TLR2A	PMID: 35549310; 33545035; 37848421; 30626692
	Naive B cells	EBF1;PAX5, BANK1,IRF8	PMID: 34824268; 33352111; 33579751; 35090788
	Plasma cell	JCHAIN,MZB1	PMID: 35090788; 34385315
	Naive/activated CD4+ T	CD3D,CD3E,CD4,TCF7,CD28,ICOS	PMID: 35549406; 30479382; 33223527; 36131938
	Naive CD8+ T	CD3D,CD3E,CD8,TCF7,LEF1,CCR7	PMID: 35549406; 30479382
	CD8+ CTL	CD3D,CD3E,CD8A,XCL1,GNLY,GZMM	PMID: 38287279;35549406;30479382
	gdT_1	CD3D,CD3E, MAF,SOX13,TARP,BLK,	PMID: 35549406; 30538336; 23562159; 38287279; 33692482
	Eosinophil	EPX,IL5RA	PMID: 23736699; 34638583
	Chondrocyte	ACAN,COL11A1,MATN3,MATN4,COL9A1	PMID: 39045052
	Osteoblasts	POSTN, IBSP, MMP13, RUNX2	PMID: 39045052
	Endothelial cell	VWF, VCAM1	PMID: 36198871; 31146585
	CTSG+ immune cell	CD3D,CD3E,HDC,GATA2,FCER1G
Pectoral muscles	Macrophage	C1QB,MAFB,CSF1R,C1QC	PMID: 33741943; 31892341; 27810926; 31892341
	Plasma cell	JCHAIN,MZB1	PMID: 35090788; 34385315
	Naïve CD8+ T/CTL	CD3E,CD8A,TCF7,GNLY	PMID: 30479382; 35549406
	Fibroblast	COL1A2,DCN,COL3A1,COL1A1,POSTN	PMID: 34140509; 36646705; 33741943
	Endothelial cell	VWF,PECAM1,CDH5	PMID: 36198871
	Pericyte	KCNJ8,RGS5	PMID: 35722109
	Skeletal muscle cell	TTN,TNNC2,TNNT3	PMID: 32624006; 37919520
	Neuron	NRXN1	PMID: 36646705
	Cycling T/B	MKI67,TOP2A,MZB1,CD3D	PMID: 35310332; 34385315; 35549406
Bursa of Fabricius	Platelet	ITGB3,GP9	PMID: 38287279; 37063767
	Macrophage	C1QB,MAFB,C1QC,	PMID: 33741943; 31892341; 27810926
	Nonclassical monocytes/macrophage	CX3CR1,TIMD4,CSF1R,C1QB,C1QA	PMID: 37464408; 30626692; 33741943; 31892341
	FDC	CXCL13,VCAM1	PMID: 20853499
	DC1	FLT3; NAAA,XCR1	PMID: 36685557; 30979687; 33545035
	DC progenitor	KIT,LAMP3,WDFY4	PMID: 35549406; 10607696; 36685557
	Large B	TOP2A,AICDA,VPREB3	PMID: 35090788; 36513063
	Small B	AICDA,VPREB3	PMID: 35090788; 36513063
	Naive B cells	EBF1;PAX5, BANK1,IRF8	PMID: 34824268; 33352111; 33579751; 35090788
	Memory B cells	MZB1,BCL2,BACH2,HHEX,CCR6, GPR183	PMID: 32377375; 32601467; 33010224; 32601467
	GC_B(I)	PAX5,MKI67,AICDA,BCL6	PMID: 35549406; 33352111; 35549406
	GC_B(II)	PAX5,AICDA,BCL6	PMID: 35549406; 33352111
	Plasmablasts	MKI67,JCHAIN,MZB1	PMID: 35549406; 35090788; 34385315
	Plasma cell	JCHAIN,MZB1	PMID: 35090788; 34385315
	Naive CD4+ T	CD3D,CD3E,CD4,TCF7,CCR7,KLF2	PMID: 35549406; 30479382; 37646019
	Naive CD8+ T	CD3D,CD3E,CD8,TCF7,CCR7,KLF2	PMID: 30479382; 37646019
	Non-canonical T	CD3D,CD3E,CD4-,CD8-,TCF7,CD28,PTPRJ,CTLA4,KLF2
	Activated CD4+ T	CD3D,CD3E,CD4,CD28,ICOS	PMID: 35549406; 33223527; 36131938
	Treg	CD3D,CD3E,CD4,CTLA4,IL2RA,TNFRSF18,ICOS,IKZF2,BATF	PMID: 35549406; 39392468; 30479382
	Tfh	CD3D,CD3E,CD4,CD28,IL21,ICOS	PMID: 15210760;
	CD8+ CTL	CD3D,CD3E,CD8A,XCL1,GNLY,GZMM	PMID: 38287279;35549406;30479382
	CTSG+ immune cell	CD3D,CD3E,HDC,GATA2,FCER1G
	gdT_1	CD3D,CD3E,MAF,SOX13,TARP	PMID: 35549406; 30538336; 23562159; 38287279
	gdT_2	CD3D,CD3E,CCR6,MAF,IL17A	PMID: 35549406; 35757696; 21573786
	NK2	PRF1,GZMA,GZMK,GNLY,CCL5	PMID: 35549406; 35549406; 37607536
	ILC2	GATA3,ID2,IL13	PMID: 36050414
	Fibroblast	COL1A2,DCN,COL3A1,COL1A1,POSTN	PMID: 34140509; 36646705 ; 33741943
	Myofibroblast	MYL9,TAGLN,DCN,COL3A1,COL1A1	PMID: 35549404; 34140509; 36646705; 33741943; 39653186
	Epithelial cell	KRT7,EPCAM	PMID: 38650025; 35750885
	Paneth cell	LYZ,EPCAM	PMID: 29802404; 35750885
	Endothelial cell	VWF,PECAM1,CDH5	PMID: 36198871
	Schwann cell	SOX10,CDH19	PMID: 20457761; 33382200
	Cycling nonclassical monocytes/macrophage	TOP2A,MKI67CX3CR1,TIMD4,CSF1R,C1QB,C1QA	PMID: 33741943; 31892341; 37464408; 30626692
Cecal tonsil	Erythrocyte	HBA1,HBBA,HBAD	PMID: 35514346; 38287279; 34957119
	Macrophage	C1QB,MAFB,C1QC,	PMID: 33741943; 31892341; 27810926
	FDC	CXCL13,TNFSF13B	PMID: 20853499; 24948364
	DC1	IRF8,FLT3, NAAA	PMID: 32686767; 30979687
	Naive B cells	EBF1;PAX5, BANK1,IRF8	PMID: 34824268; 33352111; 33579751; 35090788
	Memory B cells	MZB1,BCL2,BACH2,HHEX,CCR6, GPR183	PMID: 32377375; 32601467; 33010224; 32601467
	GC_B(I)	PAX5,MKI67,AICDA,BCL6	PMID: 35549406; 33352111; 35549406
	GC_B(II)	PAX5,AICDA,BCL6	PMID: 35549406; 33352111
	Plasmablasts	MKI67,JCHAIN,MZB1	PMID: 35549406; 35090788; 34385315
	Plasma cell	JCHAIN,MZB1	PMID: 35090788; 34385315
	Naive CD4+ T	CD3D,CD3E,CD4,TCF7,CCR7,KLF2	PMID: 35549406; 30479382; 37646019
	Naive CD8+ T	CD3D,CD3E,CD8,LEF1,TCF7,CCR7,KLF2	PMID: 35549406; 30479382; 37646019
	Non-canonical T	CD3D,CD3E,CD4-,CD8-,TCF7,CD28,PTPRJ,CTLA4,KLF2
	Activated CD4+ T	CD3D,CD3E,CD4,CD28,ICOS	PMID: 35549406; 33223527; 36131938
	Tfh	CD3D,CD3E,CD4,CD28,IL21,ICOS	PMID: 15210760;
	CD8+ CTL	CD3D,CD3E,CD8A,GNLY,XCL1,CCL5	PMID: 35549406; 31624246
	IL7R+CD8+ CTL	CD3D,CD3E,CD8,GNLY,IL7R,XCL1,CCL5	PMID: 35549406, 30479382; 30479382; 31624246
	gdT_1	CD3D,CD3E,MAF,SOX13,TARP	PMID: 35549406; 30538336; 23562159; 38287279
	gdT_2	CD3D,CD3E, IL17A,IL17F,MAF	PMID: 35549406; 21573786; 30538336
	NK1	EOMES,CCL5,XCL1,GZMM	PMID: 36640314; 37607536;
	NK2	PRF1,GZMA,GZMK,GNLY,CCL5	PMID: 35549406; 35549406; 37607536
	ILC2	GATA3,ID2,IL13	PMID: 36050414
	Schwann cell	SOX10,CDH19	PMID: 20457761; 33382200
	Myofibroblast	MYL9,TAGLN,DCN,COL3A1,COL1A1	PMID: 35549404; 34140509; 36646705; 33741943; 39653186
	Epithelial cell	KRT7,EPCAM	PMID: 38650025; 35750885
	Endothelial cell	VWF,LYVE1,AQP1	PMID: 36198871; 32059779; 32059779
	Cycling T/NK	TOP2A,MKI67,CD3D,CD3E	PMID: 35310332; 35549406
Cecum	Erythrocyte	HBA1,HBBA,HBAD	PMID: 35514346; 38287279; 34957119
	Macrophage	MAFB,HMOX1	PMID: 27810926; 30348985
	FDC	CXCL13,TNFSF13B	PMID: 20853499; 24948364
	DC1	IRF8, NAAA	PMID: 32686767; 30979687
	Naive B cells	EBF1;PAX5, BANK1,IRF8	PMID: 34824268; 33352111; 33579751; 35090788
	Memory B cells	MZB1,BCL2,BACH2,HHEX,CCR6, GPR183	PMID: 32377375; 32601467; 33010224; 32601467
	GC_B(I)	PAX5,MKI67,AICDA,BCL6	PMID: 35549406; 33352111; 35549406
	GC_B(II)	PAX5,AICDA,BCL6	PMID: 35549406; 33352111
	Plasma cell	JCHAIN,MZB1,IGLL1	PMID: 35090788; 34385315; 34824268
	Naive CD4/CD8+ T	CD3D,CD3E,CD4,CD8,LEF1,TCF7,KLF2	PMID: 35549406; 30479382; 37646019
	Activated CD4+ T	CD3D,CD3E,CD4,CD28,ICOS,IL2RA	PMID: 35549406; 33223527; 36131938; 37646019
	Activated CD8+ T	CD3D,CD3E,CD8,GNLY,NAV3	PMID: 35549406; 14623913
	Treg	CD3D,CD3E,CD4,CTLA4,IL2RA,TNFRSF18,ICOS,IKZF2,BATF	PMID: 35549406; 39392468; 30479382
	CD8+ CTL	CD3D,CD3E,CD8A,GNLY,CCL5,XCL1	PMID: 35549406; 39392468; 30479382
	gdT_1	CD3D,CD3E,MAF,SOX13,TARP	PMID: 35549406; 30538336; 23562159; 38287279
	gdT_2	CD3D,CD3E,CCR6,MAF,RORC,IL17A,IL17F	PMID: 35549406; 35757696; 33692482; 21573786
	NK1	XCL1,GNLY,CCL5	PMID: 37607536; 32271902
	NK2	PRF1,GZMA,GZMK,GNLY,CCL5	PMID: 35549406; 35549406
	ILC2	GATA3,ID2,IL13	PMID: 36050414
	Fibroblast	COL1A1,COL1A2,COL3A1,DCN,POSTN	PMID: 34140509; 36646705; 33741943
	Epithelial cell	KRT18	PMID: 35608199
	Enterocyte	EPCAM,FABP1,AQP8	PMID: 35750885; 39273007; 29802404
	Tuft cell	TRPM5,	PMID: 35176508
	Endothelial cell	VWF,LYVE1,AQP1	PMID: 36198871; 32059779
	Smooth muscle cell	MYH11, MYLK,MYL9,ACTA2	PMID: 36646705; 34140509; 35069694; 37189183
	Schwann cell	SOX10,CDH19	PMID: 20457761; 33382200
	Cycling T/B	MKI67,TOP2A,CD3D,VPREB3	PMID: 35310332; 35549406; 35090788
Cerebellum	Erythrocyte	HBA1,HBBA,HBAD	PMID: 35514346; 38287279; 34957119
	Microglia	PTPRC,CSF1R	PMID: 31835035
	Plasma cell	JCHAIN,MZB1,IGLL1	PMID: 35090788; 34385315; 34824268
	CD8+ CTL	CD3D,CD3E,CD8A,XCL1,GNLY,GZMM	PMID: 38287279;35549406;30479382
	Smooth muscle cell	MYH11, MYLK,MYL9,ACTA2	PMID: 36646705; 34140509; 35069694; 37189183
	Fibroblast	COL1A2,DCN,COL3A1,COL1A1	PMID: 34140509; 36646705 ;
	Ependymal cell	DNAH9,CFAP43	PMID: 36192459; 38956598
	Endothelial cell	VWF,PECAM1,AQP1	PMID: 36198871; 32059779
	GABAergic inhibitory interneurons	GAD1,GAD2	PMID: 29724907;
	Oligodendrocyte	PLP1, MBP	PMID: 33393903; 33510160
	Glutamatergic excitatory neurons	RBFOX3,SNAP25, SYT1,CAMK2A	PMID: 36048957; 29724907
	Astrocyte	RFX4, AQP4	PMID: 39149497; 36010640
Cerebral cortex	Erythrocyte	HBA1,HBBA,HBAD	PMID: 35514346; 38287279; 34957119
	Microglia	PTPRC,CSF1R	PMID: 31835035
	Plasma cell	JCHAIN,MZB1,IGLL1	PMID: 35090788; 34385315; 34824268
	CD8+ CTL	CD3D,CD3E,CD8A,XCL1,GNLY,GZMM	PMID: 38287279;35549406;30479382
	Myofibroblast	MYL9,TAGLN,DCN,COL3A1,COL1A1,RGS5,MYO1B,COL1A2	PMID: 35549404; 34140509; 36646705 ; 33741943; 39653186; 33710643
	Fibroblast	COL1A2,DCN,COL1A1	PMID: 34140509; 36646705 ;
	Ependymal cell	DNAH9,CFAP43	PMID: 36192459; 38956598
	Endothelial cell	VWF	PMID: 36198871
	Glutamatergic excitatory neurons	SNAP25, SYT1,CAMK2A	PMID: 36048957; 29724907
	Oligodendrocyte	PLP1, MBP	PMID: 33393903; 33510160
	Astrocyte	RFX4, AQP4	PMID: 39149497; 36010640
	Neuron	CADPS2,RELN,NRXN3	PMID: 34919646; 38561620; 34879268
Crop	Erythrocyte	HBA1,HBBA,HBAD	PMID: 35514346; 38287279; 34957119
	Platelet	ITGB3	PMID: 38287279
	Macrophage	MAFB,C1QB,C1QA,CSF1R	PMID: ; 31892341; 27810926; 33741943
	T cell	CD3D,CD3E,BCL11B	PMID: 35549406; 38287279
	Fibroblast	COL1A1,COL1A2,COL3A1,DCN,POSTN	PMID: 34140509; 36646705; 33741943
	Epithelial cell	KRT13,KRT5	PMID: 35608199;
	Endothelial cell	VWF,LYVE1,AQP1	PMID: 36198871; 32059779; 32059779
	Smooth muscle cell	MYH11, MYLK,MYL9,ACTA2	PMID: 36646705; 34140509; 35069694; 37189183
	Neuron	VIP,GAL	PMID: 32193397; 33692491
	Schwann cell	SOX10,CDH19	PMID: 20457761; 33382200
	Adipocyte	PLIN1,ACSL1,G0S2	PMID: 31023895; 38902599; 33621367
	Cycling fibroblast	MKI67,TOP2A,COL1A2,DCN,COL3A1	PMID: 35310332; 35549404; 34140509; 36646705 ; 33741943
Duodenum	Erythrocyte	HBA1,HBBA,HBAD	PMID: 35514346; 38287279; 34957119
	Macrophage	CSF1R,C1QB,C1QA,MARCO	PMID: 33741943; 31892341; 30348985
	DC1	IRF8,FLT3,WDFY4; NAAA	PMID: 32686767; 36685557; 30979687
	Naive B cells	EBF1;PAX5, BANK1,IRF8	PMID: 34824268; 33352111; 33579751; 35090788
	Memory B cells	MZB1,BCL2,BACH2,HHEX,CCR6, GPR183	PMID: 32377375; 32601467; 33010224; 32601467
	GC_B(I)	PAX5,MKI67,AICDA,BCL6	PMID: 35549406; 33352111; 35549406
	GC_B(II)	PAX5,AICDA,BCL6	PMID: 35549406; 33352111
	Plasmablasts	MKI67,JCHAIN,MZB1	PMID: 35549406; 35090788; 34385315
	Plasma cell	JCHAIN,MZB1	PMID: 35090788; 34385315
	Naive/activated CD4+ T	CD3D,CD3E,CD4,KLF2,CD28,ICOS	PMID: 35549406; 33223527; 36131938
	Naive/activated CD8+ T	CD3D,CD3E,CD8,KLF2,CD28	PMID: 35549406; 33223527
	Naive CD4/CD8+ T	CD3D,CD3E,CD4,CD8,LEF1,CCR7,TCF7,KLF2	PMID: 35549406; 30479382; 37646019
	Non-canonical T	CD3D,CD3E,CD4-,CD8-,TCF7,CD28,PTPRJ,CTLA4,KLF2
	Activated CD4+ T	CD3D,CD3E,CD4,CD28,ICOS	PMID: 35549406; 33223527; 36131938
	Activated CD8+ T	CD3D,CD3E,CD8,GNLY,NAV3	PMID: 35549406; 14623913
	Treg	CD3D,CD3E,CD4,CTLA4,IL2RA,TNFRSF18,ICOS,IKZF2,BATF	PMID: 35549406; 39392468; 30479382
	CD8+ CTL	CD3E,,CD8A,XCL1,GNLY,GZMM,CCL5	PMID: 38287279;35549406;30479382; 39392468
	gdT_1	CD3D,CD3E,MAF,SOX13,TARP	PMID: 35549406; 30538336; 23562159; 38287279
	gdT_2	CD3D,CD3E,CCR6,MAF,RORC,IL17A,IL17F	PMID: 35549406; 35757696; 33692482; 21573786
	NK1	XCL1,GNLY,CCL5	PMID: 37607536; 32271902
	NK2	PRF1,GZMA,GZMK,GNLY	PMID: 35549406; 35549406
	ILC2	GATA3,ID2,IL13	PMID: 36050414
	Epithelial cell	KRT18	PMID: 35608199;
	Enterocyte	ALPI ,FABP1,FABP2	PMID: 29802404;35511361; 39273007
	Goblet cell	MUC2,MUC5ACL,AGR2	PMID: 30097657; 35511361
	FDC	CXCL13	PMID: 20853499
	Tuft cell	DCLK1	PMID: 35511361
	Endothelial cell	VWF,LYVE1,AQP1	PMID: 36198871; 32059779; 32059779
	Smooth muscle cell	MYH11, MYLK,MYL9,ACTA2	PMID: 36646705; 34140509; 35069694; 37189183
	Endocrine cell	CHGA,SCGN	PMID: 34376477; 16955307
	Schwann cell	LAMA2,CDH19,SOX10	PMID: 32390798; 20457761; 33382200
	Cycling T/NK/B	MKI67,TOP2A,CD3D,CD3E,MZB1,EBF1	PMID: 35310332; 35549406; 34385315; 34824268
Esophagus	Macrophage	MAFB,C1QB,C1QA,CSF1R	PMID: ; 31892341; 27810926; 33741943
	Fibroblast	COL1A1,COL1A2,COL3A1,DCN	PMID: 34140509; 36646705
	Myofibroblast	TAGLN,DCN,COL3A1,COL1A1	PMID: 39653186; 35549404; 34140509; 36646705 ; 33741943
	Pericyte	PDGFRB,RGS4,KCNJ8,RGS5	PMID: 35722109
	Basal cell	KRT13,EPCAM	PMID: 35750885; 33691112
	Endothelial cell	PECAM1,VWF,CDH5	PMID: 36198871
	Smooth muscle cell	MYH11, MYLK,MYL9,ACTG2	PMID: 36646705; 34140509; 35069694; 32769974
	Schwann cell	SOX10,CDH19	PMID: 20457761; 33382200
Gizzard	Erythrocyte	HBA1,HBBA,HBAD	PMID: 35514346; 38287279; 34957119
	Macrophage	CSF1R,C1QB,C1QA,MAFB	PMID: 33741943; 31892341
	DC1	XCR1,WDFY4	PMID: 33545035; 36685557
	Naive CD4+ T	CD3D,CD3E,CD4,TCF7,CCR7,KLF2	PMID: 35549406; 30479382; 37646019
	Naive CD8+ T	CD3D,CD3E,CD8,LEF1,TCF7,CCR7,KLF2	PMID: 35549406; 30479382; 37646019
	Non-canonical T	CD3D,CD3E,CD4-,CD8-,TCF7,CD28,PTPRJ,CTLA4,KLF2
	Treg	CD3D,CD3E,CD4,CTLA4,IL2RA,TNFRSF18,ICOS,IKZF2,BATF	PMID: 35549406; 39392468; 30479382
	Th1	CD3D,CD3E,CD4,IL18,STAT4	PMID: 35549406; 24275602; 12461566
	CD8+ CTL	CD3D,CD3E,CD8,GNLY,CCL5	PMID: 35549406; 31624246
	gdT_1	CD3D,CD3E,TARP,MAF	PMID: 35549406; 30538336; 38287279
	gdT_2	CD3D,CD3E,CCR6,IL17F,SOX13,TARP	PMID: 35549406; 35757696; 21573786; 23562159; 38287279
	ILC2	GATA3,ID2,IL13	PMID: 36050414
	Pericyte	PDGFRB,RGS4,KCNJ8,RGS5	PMID: 35722109
	Fibroblast	COL1A1,COL1A2,COL3A1,DCN	PMID: 35722109
	Myofibroblast	GUCY1A2,ACTA2	PMID: 39684644; 34140509
	Epithelial cell	KRT18,MUC5ACL,TFF3	PMID: 35608199; 30097657
	Pit cell	KRT18,MUC5ACL,TFF3	PMID: 35608199; 30097657
	Endothelial cell	PECAM1,VWF,CDH5,AQP1	PMID: 36198871; 32059779
	Smooth muscle cell	MYH11, MYLK,MYL9,ACTG2,TAGLN	PMID: 36646705; 34140509; 35069694; 32769974; 34338296
	Schwann cell	LAMA2,CDH19,SOX10	PMID: 32390798; 20457761; 33382200
Heart	Erythrocyte	HBA1,HBBA,HBAD	PMID: 35514346; 38287279; 34957119
	Erythrocyte/platelet	ITGB3,MPL,HBA1,HBBA,HBAD	PMID: 35514346; 38287279; 34957119; 33384332
	Macrophage	MAFB,CSF1R,C1QA	PMID: 27810926; 30979687; 31892341
	T cell	CD3D,CD3E,TCF7	PMID: 35549406;
	Fibroblast	COL1A1,COL1A2,COL3A1,DCN,POSTN	PMID: 34140509; 36646705; 33741943
	Endocardial cell	NPR3	PMID: 33741943
	Endothelial cell	PECAM1,VWF,CDH5	PMID: 36198871
	Pericyte	PDGFRB,RGS4,KCNJ8,RGS5	PMID: 35722109
	Cardiomyocyte	TTN,RYR2	PMID: 35722109
	Schwann cell	SOX10,CDH19	PMID: 20457761; 33382200
	Cycling fibroblast	TOP2A,MKI67,COL1A2	PMID: 35310332; 33741943
Hypothalamus	Erythrocyte	HBA1,HBBA,HBAD	PMID: 35514346; 38287279; 34957119
	Microglia	PTPRC,CSF1R	PMID: 31835035
	Plasma cell	JCHAIN,MZB1	PMID: 35090788; 34385315
	T cell	CD3D,CD3E,BCL11B	PMID: 35549406; 38287279
	Myofibroblast	TAGLN,DCN,COL1A1	PMID: 39653186; 33741943
	Fibroblast	COL1A2,DCN,COL1A1	PMID: 34140509; 33741943;
	Ependymal cell	DNAH9,CFAP43	PMID: 36192459; 38956598
	Endothelial cell	VWF,CDH5	PMID: 36198871
	Endocrine cell	CHGA,SCG2	PMID: 34376477; 37098639
	Oligodendrocyte	PLP1, MBP	PMID: 33393903; 33510160
	Astrocyte	RFX4, AQP4	PMID: 39149497; 36010640
	Neuron	CADPS2,RELN	PMID: 34919646; 38561620
lleum	Erythrocyte	HBA1,HBBA,HBAD	PMID: 35514346; 38287279; 34957119
	Macrophage	MAFB,MPEG1	PMID: 27810926; 39627536
	DC1	IRF8,FLT3,WDFY4; NAAA	PMID: 32686767; 36685557; 30979687
	Naive B cells	EBF1;PAX5, BANK1,IRF8	PMID: 34824268; 33352111; 33579751; 35090788
	Memory B cells	MZB1,BCL2,BACH2,HHEX,CCR6, GPR183	PMID: 32377375; 32601467; 33010224; 32601467
	GC_B(I)	PAX5,MKI67,AICDA,BCL6	PMID: 35549406; 33352111; 35549406
	Plasma cell	JCHAIN,MZB1	PMID: 35090788; 34385315
	Naive CD4/CD8+ T	CD3D,CD3E,CD4,CD8,LEF1,CCR7,TCF7,KLF2	PMID: 35549406; 30479382; 37646019
	Activated CD8+ T	CD3D,CD3E,CD8,GNLY,NAV3	PMID: 35549406; 14623913
	CD8+ CTL	CD3D,CD3E,CD8,GZMA,GNLY,GZMM,CCL5	PMID: 38287279;35549406; 39392468
	gdT_1	CD3D,CD3E, MAF,SOX13,TARP	PMID: 35549406; 30538336; 23562159; 38287279;
	gdT_2	CD3D,CD3E,CCR6,MAF,RORC,IL17A,IL17F	PMID: 35549406; 35757696; 33692482; 21573786
	NK1	CCL5,XCL1	PMID: 37607536;
	Enterocyte	FABP2,FABP1,SI	PMID: 35511361; 39273007; 29802404
	Goblet cell	MUC2,MUC5ACL,AGR2	PMID: 30097657; 35511361
	Tuft cell	TRPM5,DCLK1	PMID: 35176508; 35511361
	Endocrine cell	CHGA,SCGN	PMID: 34376477; 16955307
	Cycling T/NK	TOP2A,MKI67,CD3D,CD3E	PMID: 35310332; 35549406
Intestine	Erythrocyte	HBA1,HBBA,HBAD	PMID: 35514346; 38287279; 34957119
	Nonclassical monocytes/macrophage	CX3CR1,TIMD4,CSF1R,C1QB,C1QA	PMID: 37464408; 30626692; 33741943; 31892341
	B cell	MZB1;PAX5	PMID: 34385315; 33352111
	Naive/activated CD4+ T	CD3D,CD3E,CD4,KLF2,TCF7,CD28,ICOS	PMID: 35549406; 30479382; 33223527; 36131938
	CTSG+ immune cell	CD3D,CD3E,HDC,GATA2,FCER1G
	gdT_2	CD3D,CD3E,CCR6,MAF,RORC,IL17A	PMID: 35549406; 35757696; 33692482; 21573786
	NK1	XCL1,GNLY,CCL5	PMID: 37607536; 32271902
	ILC2	GATA3,ID2,IL13	PMID: 36050414
	Mesenchyme	SNAI2,ALDH1A3	PMID: 35675036; 35830795
	Basal cell	KRT7,EPCAM	PMID: 35750885; 38650025
	Pericyte	PDGFRB,RGS4,KCNJ8,RGS5	PMID: 35722109
	Enterocyte	EPCAM,FABP1),SI	PMID: 35722109
	Endothelial cell	PECAM1,VWF,CDH5	PMID: 36198871
	Smooth muscle cell	MYH11, MYLK,MYL9,ACTG2,TAGLN	PMID: 36646705; 34140509; 35069694; 32769974; 34338296
	Schwann cell	SOX10,CDH19	PMID: 20457761; 33382200
	Cycling DC1	TOP2A,MKI67,FLT3; NAAA,XCR1,IRF8	PMID: 30979687;33545035;32686767;35310332
	Cycling gdT	TOP2A,MKI67,CCR6,MAF,RORC,IL17A	PMID:35310332; 35757696;33692482;21573786
	Cycling CTSG+ immune cell	CD3D,CD3E,HDC,GATA2,FCER1G,MKI67,TOP2A
	Fibroblast	COL1A1,COL1A2,COL3A1,DCN	PMID: 34140509; 36646705 ;
	Cycling mesenchyme	TOP2A,MKI67,SNAI2,ALDH1A3	PMID: 35310332; 35675036; 35830795
Jejunum	Erythrocyte	HBA1,HBBA,HBAD	PMID: 35514346; 38287279; 34957119
	Macrophage	CSF1R,MAFB	PMID: 27810926; 33741943;
	Naive/Memory B cells	KLF2,EBF1;PAX5	PMID: 32601467; 34824268; 33352111
	GC B	PAX5,MKI67,AICDA,BCL6	PMID: 35549406; 33352111; 35549406
	Plasma cell	JCHAIN,MZB1	PMID: 35090788; 34385315
	Naive CD4/CD8+ T	CD3D,CD3E,CD4,CD8,LEF1,CCR7,TCF7,KLF2	PMID: 35549406; 30479382; 37646019
	Activated CD8+ T	CD3D,CD3E,CD8,GNLY,NAV3	PMID: 35549406; 14623913
	gdT_1	CD3D,CD3E, MAF,SOX13,TARP	PMID: 35549406; 30538336; 23562159; 38287279;
	gdT_2	CD3D,CD3E,CCR6,MAF,RORC,IL17A	PMID: 35549406; 35757696; 33692482; 21573786
	NK1	FCER1G,CCL5,XCL1	PMID: 37607536;
	Enterocyte	FABP2,FABP1,SI	PMID: 35511361; 39273007; 29802404
	Goblet cell	MUC2,MUC5ACL,AGR2	PMID: 30097657; 35511361
	Tuft cell	TRPM5,DCLK1	PMID: 35176508; 35511361
	Endocrine cell	CHGA,SCGN	PMID: 34376477; 16955307
	Cycling T/NK	TOP2A,MKI67,CD3D,CD3E	PMID: 35310332; 35549406
Kideny	Erythrocyte	HBA1,HBBA,HBAD	PMID: 35514346; 38287279; 34957119
	Macrophage	CSF1R,C1QB,C1QA	PMID: 33741943; 31892341
	DC1	IRF8,WDFY4; NAAA,XCR1	PMID: 32686767; 36685557; 30979687; 33545035
	B cell	MZB1;EBF1;PAX5	PMID: 34385315; 34824268; 33352111
	Naive/activated CD4+ T	CD3D,CD3E,CD4,KLF2,TCF7,CD28,ICOS	PMID: 35549406; 30479382; 33223527; 36131938
	Naive/activated CD8+ T	CD3D,CD3E,CD8,KLF2,TCF7,CD28	PMID: 35549406; 30479382; 33223527
	CD8+ CTL	CD3D,CD3E,CD8,XCL1,GNLY,CCL5	PMID: 38287279;35549406;30479382;39392468
	Treg	CD3D,CD3E,CD4,CTLA4,IL2RA,ICOS,IKZF2	PMID: 35549406; 39392468
	T cell	CD3D,CD3E,BCL11B	PMID: 35549406; 38287279
	Collecting duct intercalated cell	ATP6V1G3, ATP6V0D2,SLC26A4,SLC4A1	PMID: 29622724;29622724;29622724;29622724
	Distal convoluted tubule cell	SLC12A3,ATP1A1	PMID: 29622724; PMCID: PMC9233501
	Proximal convoluted tubule	SPP1,SLC26A1,SLC22A1,CUBN,LRP2,SLC34A1	PMID: 36496458; 12217875; 32927790; 36496458; 38513647; PMCID: PMC9233501
	Collecting duct principal cell	AQP2, HSD11B2, SCNN1B	PMID: 29622724; 29622724;PMCID: PMC9176741
	Kidney epithelial cell	SLC4A4,KCNJ1,ATP1B1	PMID: 36496458; 30799406; PMCID: PMC9233501;
	Podocyte	NPHS2,PTPRO	PMID: 29622724; 38513647
	Endothelial cell	PECAM1,VWF,CDH5	PMID: 36198871
	Cycling T/NK	TOP2A,MKI67,CD3D,CD3E	PMID: 35310332; 35549406
Leg muscle	Erythrocyte	HBA1,HBBA,HBAD	PMID: 35514346; 38287279; 34957119
	Macrophage	MAFB,CSF1R,C1QB	PMID: 33741943; 31892341; 27810926
	DC1	IRF8,WDFY4	PMID: 32686767; 36685557;
	Plasma cell	JCHAIN,MZB1	PMID: 35090788; 34385315
	T cell	CD3D,CD3E,BCL11B	PMID: 35549406; 38287279
	Fibroblast	COL1A2,POSTN	PMID: 34140509; 33741943;
	Neuron	NRXN1,PENK,ATXN1	PMID: 36646705; 38281730; 23328439
	FAP (Fibroadipogenic progenitor)	LUM,FBN1,COL1A2,DCN,COL1A1,COL3A1	PMID: 36200044
	Muscle satellite cell	PAX7	PMID: 2182809; 38751367
	Endothelial cell	PECAM1,VWF	PMID: 36198871
	Pericyte	KCNJ8,RGS5	PMID: 35722109
	Skeletal muscle cell	TTN,TNNC2,TNNT3	PMID: 32624006; 37919520
	Tenocyte	COL12A1,COL22A1	PMID: 36371589;
	Schwann cell	SOX10,CDH19	PMID: 20457761; 33382200
	Adipocyte	PLIN1,ACSL1,G0S2	PMID: 31023895; 38902599; 33621367
	Endothelial cell	LYVE1,PDPN,PROX1	PMID: 32059779; 32059779
	Cycling fibroblast	TOP2A,MKI67,POSTN	PMID: 35310332; 33741943
	Cycling muscle satellite cell	TOP2A,MKI67(35310332)PAX7	PMID:35310332; 21828093
	Cycling endothelial cell	TOP2A,MKI67,PECAM1,CDH5	PMID: 36198871; 35310332
Liver	Erythrocyte	HBA1,HBBA,HBAD	PMID: 35514346; 38287279; 34957119
	Platelet	ITGB3,GP9	PMID: 38287279;PMID: 37063767
	Macrophage	CSF1R,C1QB,C1QA	PMID: 33741943; 31892341
	pDC	JCHAIN,IRF8,SLC15A4	PMID: 35549310; 29313948; 21045126
	FDC	CXCL13,TNFSF13B	PMID: 20853499; 24948364
	DC1	XCR1,IRF8,WDFY4	PMID: 32686767; 36685557; 33545035
	Naive B cells	EBF1;PAX5, BANK1,IRF8	PMID: 34824268; 33352111; 33579751; 35090788
	Memory B cells	MZB1,BCL2,BACH2,HHEX,CCR6, GPR183	PMID: 32377375; 32601467; 33010224; 32601467
	Plasma cell	JCHAIN,MZB1	PMID: 35090788; 34385315
	Smooth muscle cell	MYH11, MYL9,TAGLN	PMID: 36646705; 35069694; 34338296
	Hepatic stellate cell	COL1A1,ACTA2	PMID: 30348985
	Hepatocyte	ALB	PMID: 30348985; 35134346
	Cholangiocyte	SOX9,EPCAM	PMID: 30348985
	Endothelial cell	VWF,CDH5	PMID: 36198871
	Cycling nonclassical monocytes	TOP2A,MKI67,CX3CR1,TIMD4,CSF1R,C1QB,C1QA	PMID:35310332; 37464408; 30626692; 33741943; 31892341
	Cycling macrophage	TOP2A,MKI67,MAFB,CSF1R	PMID: 35310332; 27810926; 33741943
	Cycling hepatic stellate cell	TOP2A,MKI67,COL1A1,ACTA2	PMID:35310332; 30348985
	Cycling hepatocyte	TOP2A,MKI67,ALB	PMID: 35310332;30348985; 35134346
Lung	Erythrocyte	HBA1,HBBA,HBAD	PMID: 35514346; 38287279; 34957119
	Heterophil	CSF3R,EXFABP	PMID: 30979687;28623956
	Platelet	ITGB3,GP9	PMID: 38287279;PMID: 37063767
	Macrophage	MAFB,CSF1R,C1QC	PMID: 27810926; 33741943; 31892341
	CTSG+ immune cell	CD3D,CD3E,HDC,GATA2,FCER1G
	FDC	CXCL13	PMID: 20853499
	DC1	IRF8,FLT3,WDFY4,XCR1	PMID: 32686767; 30979687; 36685557; 33545035
	Naive B cells	EBF1;PAX5, BANK1,IRF8	PMID: 34824268; 33352111; 33579751; 35090788
	Memory B cells	MZB1,BCL2,BACH2,HHEX,CCR6, GPR183	PMID: 32377375; 32601467; 33010224; 32601467
	GC_B(II)	PAX5,AICDA,BCL6	PMID: 35549406; 33352111
	Plasmablasts	MKI67,JCHAIN,MZB1	PMID: 35549406; 35090788; 34385315
	Plasma cell	JCHAIN,MZB1	PMID: 35090788; 34385315
	B cell	MZB1;PAX5	PMID: 34385315; 33352111
	Naive CD4+ T	CD3D,CD3E,CD4,TCF7,CCR7,KLF2	PMID: 35549406; 30479382; 37646019
	Naive CD8+ T	CD3D,CD3E,CD8,LEF1,TCF7,CCR7,KLF2	PMID: 35549406; 30479382; 37646019
	Non-canonical T	CD3D,CD3E,CD4-,CD8-,TCF7,CD28,PTPRJ,CTLA4,KLF2
	Activated CD8+ T	CD3D,CD3E,CD8,GNLY,NAV3	PMID: 35549406; 14623913
	Treg	CD3D,CD3E,CD4,CTLA4,IL2RA,ICOS,BATF	PMID: 35549406; 39392468; 30479382
	CD8+ CTL	CD3D,CD3E,CD8A,GZMA,GNLY,GZMM,GZMK	PMID: 38287279;35549406
	gdT_1	CD3D,CD3E, MAF,SOX13,TARP	PMID: 35549406; 30538336; 23562159; 38287279;
	gdT_2	CD3D,CD3E,CCR6,MAF,RORC,IL17A	PMID: 35549406; 35757696; 33692482; 21573786
	T cell	CD3D,CD3E,BCL11B	PMID: 35549406; 38287279
	NK1	XCL1,GNLY,CCL5	PMID: 37607536; 32271902
	NK2	PRF1,GZMA,GZMK,GNLY	PMID: 35549406; 35549406
	ILC2	GATA3,ID2,IL13	PMID: 36050414
	Myofibroblast	MYL9,TAGLN,DCN	PMID: 35549404; 34140509; 36646705 ; 33741943; 39653186
	Fibroblast	COL1A1,COL1A2,COL3A1,DCN	PMID: 34140509; 36646705 ;
	Epithelial cell	KRT7,EPCAM	PMID: 38650025; 35750885
	Alveolar epithelial type 2 cell	EPCAM,SFTPA1	PMID: 37166489
	Endothelial cell	PECAM1,VWF,CDH5	PMID: 36198871
	Cycling T/NK	TOP2A,MKI67,CD3D,CD3E	PMID: 35310332; 35549406
Ovary	Erythrocyte	HBA1,HBBA,HBAD	PMID: 35514346; 38287279; 34957119
	Heterophil	CSF3R,EXFABP	PMID: 30979687;28623956
	Macrophage	CSF1R,C1QB,C1QA,MAFB	PMID: 33741943; 31892341
	DC1	IRF8,FLT3,WDFY4; NAAA	PMID: 32686767; 36685557; 30979687
	Memory B cells	MZB1,BCL2,BACH2,HHEX,CCR6, GPR183	PMID: 32377375; 32601467; 33010224; 32601467
	T cell	CD3D,CD3E,BCL11B	PMID: 35549406; 38287279
	Cycling macrophage	TOP2A,MKI67,HMOX1	PMID: 35310332; 30348985
	Eosinophil	EPX,IL5RA	PMID: 23736699; 34638583
	Fibroblast	COL1A1,COL1A2,COL3A1,DCN	PMID: 34140509; 36646705 ;
	Myofibroblast	MYL9,TAGLN,DCN	PMID: 35549404; 34140509; 36646705 ; 33741943; 39653186
	Theca cells	CYP17A1,STAR,HSD3B1	PMID: 39147128
	Endothelial cell	PECAM1,VWF,CDH5	PMID: 36198871
	Interstitial cell	ACTA2,TAGLN,ACTG2	PMID: 39147128
	Schwann cell	SOX10,CDH19	PMID: 20457761; 33382200
	Granulosa cell	CYP19A1	PMID: 39147128
Oviduct	Plasma cell	JCHAIN,MZB1	PMID: 35090788; 34385315
	Unknow	ANO1,OVOA,FAM20C
	Cilated cell	DYDC2,FOXJ1	PMID: 32686114
Pancreas	Smooth muscle cell	MYH11, MYLK,MYL9,TAGLN	PMID: 36646705; 34140509; 35069694; 34338296
	Pancreatic stellate cell	COL4A1, COL4A2, LUM, COL5A2, COL6A3	PMID: 33212097
	Epithelial cell	FABP1, EPCAM	PMID: 39273007; 31197017
	Pancreas ductal cell	SOX9	PMID: 36868230
	Endothelial cell	PECAM1,VWF,CDH5	PMID: 36198871
	Endocrine cell	CHGA,GCG	PMID: 34376477; 36868230
	Schwann cell	CDH19,LAMA2	PMID: 33382200; 32390798
	Pancreas acinar cell	CPA1,PTF1A	PMID: 26395141; 36513063; 36868230
	Cycling pancreatic stellate cell	TOP2A,MKI67,COL6A3	PMID: 35310332; 33212097;
	Pancreas cycling ductal cell	TOP2A,MKI67,SOX9	PMID: 35310332; 36868230
	Cycling endothelial cell	TOP2A,MKI67,CDH5,VWF	PMID: 36198871; 35310332
PBMC	Platelet	ITGB3,GP9	PMID: 38287279;PMID: 37063767
	CD8+ CTL	CD3E,GZMA,GNLY,GZMM,CCL5	PMID: 38287279;35549406;39392468
	Th1	CD3D,CD3E,CD4,IL18,STAT4	PMID: 35549406; 24275602; 12461566
	Naive CD4+ T	CD3D,CD3E,CD4,LEF1,CCR7,TCF7,KLF2	PMID: 35549406; 30479382; 37646019
	Naive CD8+ T	CD3D,CD3E,CD8,LEF1,TCF7,CCR7,KLF2	PMID: 35549406; 30479382; 37646019
	Treg	CD3D,CD3E,CD4,CTLA4,IL2RA,TNFRSF18,ICOS,IKZF2	PMID: 35549406; 39392468; 30479382
	Cycling T/NK	TOP2A,MKI67,CD3D,CD3E	PMID: 35310332; 35549406
	gdT_1	CD3D,CD3E, MAF,SOX13,TARP	PMID: 35549406; 30538336; 23562159; 38287279;
	NK1	XCL1,GNLY,CCL5	PMID: 37607536; 32271902
	Nonclassical monocytes	CX3CR1,TIMD4,CSF1R,C1QB,C1QA	PMID: 37464408; 30626692;33741943; 31892341
	Classical monocytes	CD14,S100A12,TLR2A	PMID: 33545035;37848421;30626692
Proventriculus	Erythrocyte	HBA1,HBBA,HBAD	PMID: 35514346; 38287279; 34957119
	Macrophage	CSF1R,C1QB,C1QA,MARCO	PMID: 33741943; 31892341; 30348985
	FDC	CXCL13	PMID: 20853499
	DC1	IRF8,FLT3,WDFY4; NAAA,XCR1	PMID: 32686767; 36685557; 30979687; 33545035
	B cell	MZB1;EBF1;PAX5	PMID: 34385315; 34824268; 33352111
	Activated CD4+ T	CD3D,CD3E,CD4,CD28,ICOS	PMID: 35549406; 33223527; 36131938
	Activated CD8+ T	CD3D,CD3E,CD8,GNLY,NAV3	PMID: 35549406; 14623913
	Treg	CD3D,CD3E,CD4,CTLA4,IL2RA,TNFRSF18,ICOS,IKZF2	PMID: 35549406; 39392468; 30479382
	CD8+ CTL	CD3E,GZMA,GNLY,GZMM,CCL5	PMID: 38287279;35549406;39392468
	gdT_1	CD3D,CD3E, MAF,SOX13,TARP	PMID: 35549406; 30538336; 23562159; 38287279;
	gdT_2	CD3D,CD3E,CCR6,MAF,RORC,IL17A	PMID: 35549406; 35757696; 33692482; 21573786
	T cell	CD3D,CD3E,BCL11B	PMID: 35549406; 38287279
	NK1	XCL1,GNLY,CCL5	PMID: 37607536; 32271902
	NK2	PRF1,GZMA,GZMK,GNLY	PMID: 35549406; 35549406
	ILC2	GATA3,ID2,IL13	PMID: 36050414
	Pericyte	PDGFRB,RGS4,KCNJ8,RGS5	PMID: 35722109
	Fibroblast	COL1A1,COL1A2,COL3A1,DCN	PMID: 35722109
	Smooth muscle cell	MYH11, MYLK,MYL9,TAGLN,ACTG2,ACTA2	PMID: 36646705; 34140509; 35069694; 34338296; 32769974; 37189183
	Epithelial cell	KRT7,EPCAM	PMID: 38650025; 35750885
	Enterocyte	SI	PMID: 29802404
	Pit cell	GKN2,BASP1,KRT7	PMID: 37386010
	Tuft cell	TRPM5,DCLK1	PMID: 35176508; 35511361
	Parietal cell	ATP4B	PMID: 33691112
	Endothelial cell	PECAM1,VWF,CDH5	PMID: 36198871
	Schwann cell	SOX10,CDH19	PMID: 20457761; 33382200
	Cycling T/NK	TOP2A,MKI67,CD3D,CD3E	PMID: 35310332; 35549406
	Cycling fibroblast	TOP2A,MKI67,COL1A1,COL1A2	PMID: 35310332; 33741943; 34140509
	Cycling epithelial cell	MKI67, EPCAM, TFF3	PMID: 35310332; 35750885; 29802404
Retina	Myeloid cell	CSF1R	PMID: 33741943
	Oligodendrocyte	PLP1, MBP	PMID: 33393903; 33510160
	Muller glia cell	SLC1A3,RLBP1	PMID: 33393903
	Bipolar cell	VSX2,VSX1	PMID: 33393903
	Horizontal cell	GRIA4,ATP1B1,SLC4A3,TNR	PMID: 34691611
	Amacrine cell	SLC32A1,PAX6	PMID: 33393903
	Photoreceptor (Rod)	RHO,PDE6B	PMID: 33393903
	Photoreceptor (Cone)	RS1,ARR3	PMID: 33393903
	Retinal ganglion cell	THY1,RBPMS2	PMID: 33393903
	vRGC(intrinsically photosensitive retinal ganglion cell)	DACH1	PMID: 29688344
Skin	Erythrocyte	HBA1,HBBA,HBAD	PMID: 35514346; 38287279; 34957119
	Macrophage	CSF1R,C1QB,C1QA	PMID: 33741943; 31892341
	FDC	CXCL13,TNFSF13B	PMID: 20853499; 24948364
	DC1	IRF8,FLT3,WDFY4; NAAA,XCR1	PMID: 32686767; 36685557; 30979687; 33545035
	B cell	MZB1;IGLL1	PMID: 34385315; 34824268
	Naive/activated CD4+ T	CD3D,CD3E,CD4,TCF7,CD28,ICOS	PMID: 35549406; 33223527; 36131938
	Naive/activated CD8+ T	CD3D,CD3E,CD8,TCF7,CD28	PMID: 35549406; 33223527
	Th1	CD3D,CD3E,CD4,IL18,STAT4	PMID: 35549406; 24275602; 12461566
	CD8+ CTL	CD3D,CD3E,CD8A,GZMA,GNLY,GZMK	PMID: 38287279;35549406
	gdT_1	CD3D,CD3E, MAF,SOX13,TARP	PMID: 35549406; 30538336; 23562159; 38287279;
	gdT_2	CD3D,CD3E,CCR6,MAF,RORC,IL17A	PMID: 35549406; 35757696; 33692482; 21573786
	T cell	CD3D,CD3E,BCL11B	PMID: 35549406; 38287279
	NK2	PRF1,GZMA,GZMK,GNLY	PMID: 35549406; 35549406
	NK1	XCL1,GNLY,CCL5	PMID: 37607536; 32271902
	CTSG+ immune cell	CD3D,CD3E,HDC,GATA2,FCER1G
	Pericyte	RGS4,KCNJ8,RGS5	PMID: 35722109
	Fibroblast	COL1A1,COL1A2,COL3A1,DCN	PMID: 35722109
	Myofibroblast	RGS5,GUCY1A2,ACTA2	PMID: 33710643; 39684644; 34140509
	Keratinocyte	KRT5,KRT14	PMID: 33238152
	Endothelial cell	PECAM1,VWF,CDH5	PMID: 36198871
	Smooth muscle cell	MYH11, MYLK,MYL9,TAGLN	PMID: 36646705; 34140509; 35069694; 39653186
	Schwann cell	SOX10,CDH19	PMID: 20457761; 33382200
	Enterocyte Progenitor	LGR5,OLFM4	PMID: 29802404
	Enterocyte	SI	PMID: 29802404
	Goblet cell	MUC2,MUC5ACL	PMID: 30097657;
	Tuft cell	DCLK1	PMID: 35511361
	Endocrine cell	CHGA	PMID: 38718896
Spleen	MPP	HOXA9,LMO2,KIT	PMID: 11756161; 26764384; 35549310
	LMPP_CLP	HOXA9,LMO2,KIT,FLT3	PMID: 11756161; 26764384; 35549310; 21726834
	CMP_GMP	HOXA9,LMO2,KIT,SPINK2,CEBPD	PMID: 11756161;26764384;35549310;29706549
	CLP	HOXA9,LMO2,KIT,TCF7,GATA3	PMID: 11756161; 26764384; 35549310;21814277
	Erythrocyte	HBA1,HBBA,HBAD	PMID: 35514346; 38287279; 34957119
	Platelet	ITGB3,GP9	PMID: 38287279;PMID: 37063767
	Macrophage	C1QB,C1QA	PMID: 33741943; 31892341
	Macrophage/FDC	CXCL13,CSF1R,C1QB,C1QA	PMID: 20853499;33741943; 31892341
	Monocyte/macrophage	CX3CR1,TIMD4,CSF1R,C1QB,C1QA	PMID: 33741943; 31892341;37464408;30626692
	CTSG+ immune cell	CD3D,CD3E,HDC,GATA2,FCER1G
	FDC	CXCL13	PMID: 20853499
	DC1	IRF8,XCR1,FLT3	PMID: 32686767; 33545035; 36685557
	DC progenitor	KIT,LAMP3,WDFY4	PMID: 35549406; 10607696; 36685557
	B progenitor	EBF1;PAX5;RAG2	PMID: 34824268; 33352111
	Prebursal B	HOXA9,LMO2,KIT,SPINK2,EBF1,PAX5,RAG2	PMID: 11756161; 26764384; 35549310; 34824268; 33352111; 35090788
	Naive B cells	EBF1;PAX5, BANK1,IRF8	PMID: 34824268; 33352111; 33579751; 35090788
	GC_B(II)	PAX5,AICDA,BCL6	PMID: 35549406; 33352111
	Plasmablasts	MKI67,JCHAIN,MZB1	PMID: 35549406; 35090788; 34385315
	Plasma cell	JCHAIN,MZB1	PMID: 35090788; 34385315
	B cell	MZB1;EBF1;PAX5	PMID: 34385315; 34824268; 33352111
	Naive CD4+ T	CD3D,CD3E,CD4,LEF1,CCR7,TCF7,KLF2	PMID: 35549406; 30479382; 37646019
	Activated CD8+ T	CD3D,CD3E,CD8,GNLY,NAV3	PMID: 35549406; 14623913
	Non-canonical T	CD3D,CD3E,CD4-,CD8-,TCF7,CD28,PTPRJ,CTLA4,KLF2
	Th17	CD3D,CD3E,CD4,IL17A,IL17F	PMID: 35549406
	Naive CD8+ T	CD3D,CD3E,CD8,LEF1,TCF7,CCR7,KLF2	PMID: 35549406; 30479382; 37646019
	gdT_1	CD3D,CD3E,SOX13,TARP	PMID: 35549406; 23562159; 38287279;
	gdT_2	CD3D,CD3E,CCR6,MAF,RORC,IL17A	PMID: 35549406; 35757696; 33692482; 21573786
	CD8+ CTL	CD3E,GZMA,GNLY,GZMM	PMID: 38287279;35549406;37607536
	NK2	PRF1,GZMA,GZMK,GNLY,CCL5	PMID: 35549406; 35549406; 37607536
	NK1	XCL1,GNLY,CCL5	PMID: 37607536; 32271902
	ILC2	GATA3,ID2,IL13	PMID: 36050414
	Endothelial cell	VWF,AQP1	PMID: 36198871; 32059779
	Cycling MPP	TOP2A,MKI67(35310332),HOXA9,LMO2,KIT	PMID:35310332; 11756161; 26764384; 35549310
	Cycling T/NK	TOP2A,MKI67,CD3D,CD3E	PMID: 35310332; 35549406
	Heterophil	LYZ,DEFB4A	PMID: 28623956; 35549310
Testis	Erythrocyte	HBA1,HBBA,HBAD	PMID: 35514346; 38287279; 34957119
	Macrophage	CSF1R,C1QB,C1QA,MAFB	PMID: 33741943; 31892341; 27810926
	Myofibroblast	TAGLN,DCN,COL3A1,COL1A1	PMID: 39653186; 35549404; 34140509; 36646705 ; 33741943
	Leydig cell	NR2F2,EGFLAM	PMID: 35242757
	Sperm	TRAF3IP1,PTPN5,GKAP1,CEP41	PMID: 36544022
	Sertoli cell	PRDX6,CLDN11	PMID: 36544022
Thymus	Nonclassical monocytes	CX3CR1,TIMD4,CSF1R,C1QB,C1QA	PMID: 37464408; 30626692;33741943; 31892341
	Macrophage	CSF1R,C1QB,C1QA	PMID: 33741943; 31892341
	B cell	MZB1;EBF1;PAX5	PMID: 34385315; 34824268; 33352111
	DN	CD3D,CD3E,CD4(-),CD8(-),RAG1	PMID: 35549406; 32079746
	DP	CD3D,CD3E,CD4,CD8,RAG1	PMID: 35549406; 32079746
	Cycling DP	TOP2A,MKI67,CD3D,CD3E,CD4,CD8,RAG1	PMID: 35310332; 35549406; 32079746
	CD8+ T	CD3D,CD3E,CD8	PMID: 38287279;
	Immature_gdT	CD3D,CD3E,SOX13,TARP	PMID: 35549406; 23562159; 38287279
	gdT_1_embryo	CD3D,CD3E,SOX13,TARP	PMID: 35549406; 23562159; 38287279;
	gdT_1	CD3D,CD3E, MAF,SOX13,TARP	PMID: 35549406; 30538336; 23562159; 38287279;
	Cycling Immature_gdT	TOP2A,MKI67,CD3D,CD3E,SOX13,TARP	PMID:35310332; 38287279; 23562159
Trachea	Erythrocyte	HBA1,HBBA,HBAD	PMID: 35514346; 38287279; 34957119
	Macrophage	CSF1R,C1QB,C1QA,MAFB	PMID: 33741943; 31892341; 27810926
	FDC	CXCL13	PMID: 20853499
	DC1	IRF8,FLT3,WDFY4; NAAA,XCR1	PMID: 32686767; 36685557; 30979687; 33545035
	Naive B cells	EBF1;PAX5, BANK1,IRF8	PMID: 34824268; 33352111; 33579751; 35090788
	Memory B cells	MZB1,BCL2,BACH2,HHEX,CCR6, GPR183	PMID: 32377375; 32601467; 33010224; 32601467
	GC_B(I)	PAX5,MKI67,AICDA,BCL6	PMID: 35549406; 33352111; 35549406
	GC_B(II)	PAX5,AICDA,BCL6	PMID: 35549406; 33352111
	Plasma cell	JCHAIN,MZB1	PMID: 35090788; 34385315
	B cell	MZB1;EBF1;PAX5	PMID: 34385315; 34824268; 33352111
	Naive/activated CD4+ T	CD3D,CD3E,CD4,TCF7,CD28,ICOS	PMID: 35549406; 33223527; 36131938
	Naive/activated CD8+ T	CD3D,CD3E,CD8,TCF7,CD28	PMID: 35549406; 33223527
	Treg	CD3D,CD3E,CD4,CTLA4,IL2RA,TNFRSF18,ICOS,BATF	PMID: 35549406; 39392468; 30479382
	Tfh	CD3D,CD3E,CD4,CD28,IL21,ICOS	PMID: 15210760;
	CD8+ CTL	CD3D,CD3E,CD8A,GZMA,GNLY,GZMK	PMID: 38287279;35549406
	gdT_1	CD3D,CD3E, MAF,SOX13,TARP	PMID: 35549406; 30538336; 23562159; 38287279;
	gdT_2	CD3D,CD3E,SOX13,CCR6,MAF,RORC,IL17A	PMID: 35549406; 23562159; 35757696; 33692482; 21573786
	ILC2	GATA3,ID2,IL13	PMID: 36050414
	Fibroblast	COL1A1,COL1A2,COL3A1,DCN,POSTN	PMID: 34140509; 36646705; 33741943
	Epithelial cell	KRT7,EPCAM	PMID: 38650025; 35750885
	Endothelial cell	PECAM1,VWF,CDH5	PMID: 36198871
	Pericyte	RGS4,KCNJ8,RGS5	PMID: 35722109
	Schwann cell	SOX10,CDH19	PMID: 20457761; 33382200
	Cycling T/NK	TOP2A,MKI67,CD3D,CD3E	PMID: 35310332; 35549406
	Cycling fibroblast	TOP2A,MKI67,COL1A2	PMID: 35549404; 34140509; 36646705; 33741943; 35310332
Uterus	Macrophage	CSF1R,C1QB,C1QA,MAFB	PMID: 33741943; 31892341; 27810926
	DC1	IRF8,FLT3,WDFY4; NAAA,XCR1	PMID: 32686767; 36685557; 30979687; 33545035
	Naive CD4+ T	CD3D,CD3E,CD4,TCF7,CCR7,KLF2	PMID: 35549406; 30479382; 37646019
	Naive CD8+ T	CD3D,CD3E,CD8,TCF7,CCR7,KLF2	PMID: 35549406; 30479382; 37646019
	gdT_2	CD3D,CD3E,CCR6,MAF,RORC,IL17A	PMID: 35549406; 35757696; 33692482; 21573786
	NK2	PRF1,GZMA,GZMK,GNLY	PMID: 35549406; 35549406
	Pericyte	PDGFRB,RGS4,KCNJ8,RGS5	PMID: 35722109
	Fibroblast	COL1A1,COL1A2,COL3A1,DCN	PMID: 35722109
	Uterus stromal cell	SMOC2,LVRN	PMID: 35722109
	Epithelial cell	KRT7,EPCAM	PMID: 38650025; 35750885
	Uterus_luminal cell	ATP2C2, SLC9A2	PMID: 30443032
	Cilated cell	DNAH5,CFAP43	PMID: 39042459; 31884020
	Smooth muscle cell	MYH11, MYLK,MYL9,TAGLN	PMID: 36646705; 34140509; 35069694; 39653186
	Schwann cell	SOX10,CDH19	PMID: 20457761; 33382200
	Cycling T/NK	TOP2A,MKI67,CD3D,CD3E	PMID: 35310332; 35549406
	Uterus cycling stromal cell	MKI67,TOP2A,SMOC2,LVRN	PMID: 35310332; 35722109
	Cycling pericyte	PDGFRB,RGS4,KCNJ8,RGS5	PMID: 35722109
Whole blood	Erythrocyte	HBA1,HBBA,HBAD	PMID: 35514346; 38287279; 34957119
	Platelet	ITGB3,GP9	PMID: 38287279;PMID: 37063767
	Naive CD4+ T	CD3D,CD3E,CD4,TCF7,CCR7,KLF2	PMID: 35549406; 30479382; 37646019
	Naive CD8+ T	CD3D,CD3E,CD8,LEF1,TCF7,CCR7,KLF2	PMID: 35549406; 30479382; 37646019
	Th1	CD3D,CD3E,CD4,IL18,STAT4	PMID: 35549406; 24275602; 12461566
	Treg	CD3D,CD3E,CD4,CTLA4,IL2RA,TNFRSF18,ICOS,BATF	PMID: 35549406; 39392468; 30479382
	CD8+ CTL	CD3D,CD3E,CD8A,GZMA,GNLY,GZMK	PMID: 38287279;35549406
	gdT_1	CD3D,CD3E, MAF,SOX13,TARP	PMID: 35549406; 30538336; 23562159; 38287279;
	Cycling T/NK	TOP2A,MKI67,CD3D,CD3E	PMID: 35310332; 35549406
Yolk sac	Erythrocyte	HBA1,HBBA,HBAD	PMID: 35514346; 38287279; 34957119
	Platelet	ITGB3,GP9	PMID: 38287279; 37063767
	Macrophage	CSF1R,C1QB,C1QA	PMID: 33741943; 31892341
	CTSG+ immune cell	CD3D,CD3E,HDC,GATA2,FCER1G
	Fibroblast	COL1A1,COL1A2,COL3A1	PMID: 34140509;
	Epithelial cell	KRT7,EPCAM	PMID: 38650025; 35750885
	Endothelial cell	PECAM1,VWF,CDH5	PMID: 36198871
	Smooth muscle cell	MYH11, MYLK,MYL9,ACTG2,TAGLN	PMID: 36646705; 34140509; 35069694; 32769974; 34338296
	Cycling endothelial cell	MKI67,TOP2A,PECAM1,VWF,CDH5	PMID: 36198871; 35310332
