# Supplementary material for: Cross-species comparison of single-cell landscapes reveals conservation and innovation in chicken immune systems
Source: Research Square preprint supplement (doi:10.21203/rs.3.rs-6164369/v1), 2025-03-20
Supplement: Supplementary file 5 [file a665cdfd0d1ac316d7dc26f4.xlsx]

## Sheet: Sheet1
Supplementary Table 6: Evolutionary and functional classes of genes(mononuclear phagocyte).
Evo type: evolutionary scenario gene falls into, with NA for genes not expressed; Gene class: type of gene (CD molecules, Chemokines and recptors, etc); conserved_Num: number of homologous clusters gene where gene is expressed in both chicken and human; Human_Spec_Num: number of homologous clusters where the gene is only expressed in human; Chicken_Spec_Num, above for human.)
	Evo_Type	Conserved_Num	Human_Spec_Num	Chicken_Spec_Num	Gene_class
SAMD11	1	0	1	0	#N/A
NOC2L	1	0	2	0	#N/A
KLHL17	NA	0	0	0	#N/A
PLEKHN1	NA	0	0	0	#N/A
PERM1	NA	0	0	0	#N/A
HES4	2	1	4	0	#N/A
AGRN	NA	0	0	0	#N/A
RNF223	NA	0	0	0	#N/A
C1orf159	NA	0	0	0	#N/A
TTLL10	NA	0	0	0	#N/A
TNFRSF18	NA	0	0	0	CD molecules
TNFRSF4	NA	0	0	0	CD molecules
SDF4	0	6	0	0	#N/A
B3GALT6	NA	0	0	0	#N/A
UBE2J2	2	3	1	2	#N/A
SCNN1D	NA	0	0	0	#N/A
ACAP3	NA	0	0	0	#N/A
PUSL1	NA	0	0	0	#N/A
INTS11	1	0	4	0	#N/A
CPTP	NA	0	0	0	#N/A
TAS1R3	NA	0	0	0	#N/A
DVL1	NA	0	0	0	#N/A
MXRA8	NA	0	0	0	#N/A
AURKAIP1	1	0	6	0	#N/A
CCNL2	2	3	3	0	#N/A
MRPL20	2	2	4	0	#N/A
TMEM88B	NA	0	0	0	#N/A
ATAD3B	NA	0	0	0	#N/A
TMEM240	NA	0	0	0	#N/A
SSU72	2	5	1	0	#N/A
FNDC10	NA	0	0	0	#N/A
MIB2	NA	0	0	0	#N/A
CDK11B	2	2	2	0	#N/A
SLC35E2B	1	0	0	1	#N/A
NADK	2	4	2	0	#N/A
GNB1	0	6	0	0	#N/A
TMEM52	1	0	0	1	#N/A
CFAP74	NA	0	0	0	#N/A
GABRD	NA	0	0	0	#N/A
PRKCZ	NA	0	0	0	#N/A
FAAP20	1	0	6	0	#N/A
SKI	2	1	3	0	#N/A
RER1	2	4	2	0	#N/A
PEX10	NA	0	0	0	#N/A
PLCH2	NA	0	0	0	#N/A
PANK4	NA	0	0	0	#N/A
HES5	NA	0	0	0	#N/A
TNFRSF14	1	0	6	0	Chemokines and recptors
MMEL1	NA	0	0	0	#N/A
TTC34	NA	0	0	0	#N/A
ACTRT2	NA	0	0	0	#N/A
PRDM16	NA	0	0	0	#N/A
ARHGEF16	NA	0	0	0	#N/A
MEGF6	NA	0	0	0	#N/A
TPRG1L	1	0	0	2	#N/A
WRAP73	1	0	0	1	#N/A
TP73	NA	0	0	0	#N/A
CCDC27	NA	0	0	0	#N/A
LRRC47	NA	0	0	0	#N/A
CEP104	NA	0	0	0	#N/A
DFFB	NA	0	0	0	#N/A
C1orf174	NA	0	0	0	#N/A
AJAP1	NA	0	0	0	#N/A
NPHP4	NA	0	0	0	#N/A
KCNAB2	2	1	3	0	#N/A
CHD5	NA	0	0	0	#N/A
RPL22	2	5	1	0	#N/A
RNF207	1	0	1	0	#N/A
ICMT	NA	0	0	0	#N/A
GPR153	NA	0	0	0	#N/A
ACOT7	1	0	3	0	#N/A
ESPN	NA	0	0	0	#N/A
TNFRSF25	NA	0	0	0	#N/A
PLEKHG5	NA	0	0	0	#N/A
NOL9	1	0	0	4	#N/A
TAS1R1	NA	0	0	0	#N/A
ZBTB48	NA	0	0	0	#N/A
KLHL21	NA	0	0	0	#N/A
PHF13	NA	0	0	0	#N/A
DNAJC11	NA	0	0	0	#N/A
CAMTA1	2	4	2	0	#N/A
VAMP3	2	2	3	1	#N/A
PER3	1	0	0	1	#N/A
UTS2	NA	0	0	0	#N/A
TNFRSF9	0	1	0	0	CD molecules
PARK7	0	6	0	0	#N/A
ERRFI1	1	0	0	2	#N/A
SLC45A1	NA	0	0	0	#N/A
RERE	2	3	2	1	#N/A
ENO1	0	6	0	0	#N/A
CA6	NA	0	0	0	#N/A
SLC2A5	NA	0	0	0	#N/A
GPR157	2	1	1	0	#N/A
H6PD	1	0	1	0	#N/A
SPSB1	1	0	0	3	#N/A
SLC25A33	1	0	1	0	#N/A
TMEM201	1	0	0	2	#N/A
PIK3CD	2	1	2	0	#N/A
CLSTN1	1	0	2	0	#N/A
CTNNBIP1	1	0	1	0	#N/A
LZIC	1	0	4	0	#N/A
NMNAT1	NA	0	0	0	#N/A
RBP7	1	0	2	0	#N/A
UBE4B	NA	0	0	0	#N/A
KIF1B	3	0	2	1	#N/A
PGD	2	4	1	0	#N/A
CENPS	NA	0	0	0	#N/A
CORT	NA	0	0	0	#N/A
DFFA	NA	0	0	0	#N/A
PEX14	NA	0	0	0	#N/A
CASZ1	NA	0	0	0	#N/A
TARDBP	2	3	3	0	#N/A
MASP2	NA	0	0	0	Complement system
SRM	1	0	5	0	#N/A
EXOSC10	NA	0	0	0	#N/A
MTOR	NA	0	0	0	#N/A
ANGPTL7	NA	0	0	0	#N/A
UBIAD1	NA	0	0	0	#N/A
DISP3	NA	0	0	0	#N/A
FBXO44	NA	0	0	0	#N/A
MAD2L2	1	0	4	0	#N/A
DRAXIN	NA	0	0	0	#N/A
AGTRAP	1	0	4	0	#N/A
C1orf167	1	0	0	4	#N/A
MTHFR	1	0	3	0	#N/A
CLCN6	NA	0	0	0	#N/A
NPPA	NA	0	0	0	#N/A
NPPB	NA	0	0	0	#N/A
KIAA2013	1	0	2	0	#N/A
PLOD1	1	0	0	2	#N/A
MFN2	NA	0	0	0	#N/A
MIIP	1	0	4	0	#N/A
TNFRSF8	NA	0	0	0	CD molecules
TNFRSF1B	2	2	3	1	CD molecules
VPS13D	2	1	2	0	#N/A
DHRS3	3	0	1	1	#N/A
C1orf158	NA	0	0	0	#N/A
PDPN	NA	0	0	0	#N/A
PRDM2	3	0	5	1	#N/A
KAZN	NA	0	0	0	#N/A
TMEM51	1	0	1	0	#N/A
FHAD1	NA	0	0	0	#N/A
EFHD2	1	0	6	0	#N/A
CTRC	NA	0	0	0	#N/A
CELA2A	NA	0	0	0	#N/A
CASP9	1	0	1	0	#N/A
DNAJC16	1	0	0	1	#N/A
AGMAT	NA	0	0	0	#N/A
DDI2	1	0	1	0	#N/A
PLEKHM2	2	1	2	0	#N/A
SLC25A34	NA	0	0	0	#N/A
TMEM82	NA	0	0	0	#N/A
FBLIM1	NA	0	0	0	#N/A
UQCRHL	1	0	0	6	#N/A
SPEN	2	4	2	0	#N/A
ZBTB17	NA	0	0	0	#N/A
HSPB7	NA	0	0	0	#N/A
CLCNKB	NA	0	0	0	#N/A
EPHA2	1	0	1	0	#N/A
FBXO42	NA	0	0	0	#N/A
SZRD1	2	1	4	1	#N/A
NECAP2	2	5	1	0	#N/A
CROCC	NA	0	0	0	#N/A
MFAP2	NA	0	0	0	#N/A
ATP13A2	3	0	1	2	#N/A
SDHB	0	6	0	0	#N/A
PADI2	NA	0	0	0	#N/A
PADI1	NA	0	0	0	#N/A
PADI3	NA	0	0	0	#N/A
RCC2	2	3	2	0	#N/A
ARHGEF10L	NA	0	0	0	#N/A
IGSF21	NA	0	0	0	#N/A
KLHDC7A	NA	0	0	0	#N/A
PAX7	NA	0	0	0	#N/A
ALDH4A1	NA	0	0	0	#N/A
IFFO2	NA	0	0	0	#N/A
UBR4	1	0	4	0	#N/A
EMC1	1	0	0	1	#N/A
MRTO4	1	0	0	6	#N/A
AKR7A2	2	1	4	0	#N/A
PQLC2	1	0	0	4	#N/A
CAPZB	0	6	0	0	#N/A
MINOS1	2	2	4	0	#N/A
NBL1	1	0	1	0	#N/A
HTR6	NA	0	0	0	#N/A
TMCO4	NA	0	0	0	#N/A
OTUD3	NA	0	0	0	#N/A
PLA2G2E	NA	0	0	0	#N/A
PLA2G2A	NA	0	0	0	#N/A
PLA2G5	NA	0	0	0	#N/A
UBXN10	NA	0	0	0	#N/A
VWA5B1	NA	0	0	0	#N/A
CAMK2N1	NA	0	0	0	#N/A
MUL1	NA	0	0	0	#N/A
FAM43B	NA	0	0	0	#N/A
CDA	1	0	2	0	#N/A
PINK1	1	0	0	1	#N/A
DDOST	2	5	1	0	#N/A
KIF17	NA	0	0	0	#N/A
SH2D5	NA	0	0	0	#N/A
HP1BP3	2	4	2	0	#N/A
EIF4G3	2	4	2	0	#N/A
ECE1	1	0	3	0	#N/A
ALPL	NA	0	0	0	#N/A
RAP1GAP	NA	0	0	0	#N/A
USP48	1	0	6	0	#N/A
HSPG2	NA	0	0	0	#N/A
CELA3B	NA	0	0	0	#N/A
CDC42	0	6	0	0	#N/A
WNT4	NA	0	0	0	#N/A
ZBTB40	NA	0	0	0	#N/A
EPHA8	NA	0	0	0	#N/A
C1QA	2	2	2	0	Complement system
C1QC	2	2	2	0	Complement system
C1QB	2	2	1	0	Complement system
EPHB2	NA	0	0	0	#N/A
LACTBL1	NA	0	0	0	#N/A
KDM1A	1	0	1	0	#N/A
LUZP1	1	0	1	0	#N/A
HTR1D	NA	0	0	0	#N/A
HNRNPR	0	6	0	0	#N/A
TCEA3	NA	0	0	0	#N/A
ASAP3	NA	0	0	0	#N/A
E2F2	NA	0	0	0	#N/A
ID3	3	0	1	4	#N/A
RPL11	2	5	1	0	#N/A
PITHD1	2	3	2	0	#N/A
LYPLA2	1	0	4	0	#N/A
GALE	NA	0	0	0	#N/A
HMGCL	1	0	0	3	#N/A
FUCA1	2	1	1	1	#N/A
CNR2	NA	0	0	0	#N/A
PNRC2	2	4	2	0	#N/A
SRSF10	0	6	0	0	#N/A
MYOM3	NA	0	0	0	#N/A
IL22RA1	NA	0	0	0	Chemokines and recptors
IFNLR1	NA	0	0	0	#N/A
GRHL3	NA	0	0	0	#N/A
NIPAL3	NA	0	0	0	#N/A
RCAN3	NA	0	0	0	#N/A
SRRM1	0	6	0	0	#N/A
CLIC4	2	1	1	0	#N/A
RUNX3	2	1	1	3	#N/A
SYF2	0	6	0	0	#N/A
RSRP1	2	5	1	0	#N/A
TMEM50A	2	2	4	0	#N/A
RHCE	NA	0	0	0	CD molecules
MACO1	2	1	4	0	#N/A
LDLRAP1	NA	0	0	0	#N/A
MAN1C1	NA	0	0	0	#N/A
SELENON	1	0	1	0	#N/A
MTFR1L	1	0	0	2	#N/A
PAQR7	1	0	0	2	#N/A
STMN1	2	2	2	0	#N/A
PAFAH2	1	0	1	0	Inflammation
EXTL1	NA	0	0	0	#N/A
TRIM63	NA	0	0	0	#N/A
PDIK1L	NA	0	0	0	#N/A
FAM110D	NA	0	0	0	#N/A
ZNF593	0	6	0	0	#N/A
CNKSR1	NA	0	0	0	#N/A
CATSPER4	NA	0	0	0	#N/A
CEP85	NA	0	0	0	#N/A
SH3BGRL3	0	6	0	0	#N/A
UBXN11	1	0	3	0	#N/A
LIN28A	NA	0	0	0	#N/A
DHDDS	NA	0	0	0	#N/A
RPS6KA1	2	2	3	1	#N/A
ARID1A	2	1	5	0	#N/A
PIGV	NA	0	0	0	#N/A
ZDHHC18	1	0	1	0	#N/A
SFN	NA	0	0	0	#N/A
GPN2	NA	0	0	0	#N/A
GPATCH3	NA	0	0	0	#N/A
NUDC	2	4	2	0	#N/A
NR0B2	NA	0	0	0	#N/A
KDF1	NA	0	0	0	#N/A
SLC9A1	NA	0	0	0	#N/A
WDTC1	NA	0	0	0	#N/A
TMEM222	NA	0	0	0	#N/A
SYTL1	1	0	1	0	#N/A
MAP3K6	NA	0	0	0	#N/A
FCN3	NA	0	0	0	#N/A
CD164L2	NA	0	0	0	CD molecules
WASF2	0	6	0	0	#N/A
AHDC1	NA	0	0	0	#N/A
FGR	3	0	4	1	#N/A
IFI6	0	3	0	0	#N/A
FAM76A	NA	0	0	0	#N/A
STX12	2	4	1	1	#N/A
PPP1R8	NA	0	0	0	#N/A
THEMIS2	2	1	5	0	#N/A
RPA2	1	0	2	0	#N/A
SMPDL3B	NA	0	0	0	#N/A
XKR8	NA	0	0	0	#N/A
EYA3	NA	0	0	0	#N/A
PTAFR	2	2	1	0	Humoral Immunity
DNAJC8	0	6	0	0	#N/A
SESN2	NA	0	0	0	#N/A
MED18	NA	0	0	0	#N/A
PHACTR4	1	0	4	0	#N/A
RCC1	1	0	0	1	#N/A
TRNAU1AP	1	0	1	0	#N/A
TAF12	1	0	5	0	#N/A
RAB42	NA	0	0	0	#N/A
GMEB1	NA	0	0	0	#N/A
YTHDF2	2	1	5	0	#N/A
OPRD1	NA	0	0	0	#N/A
EPB41	2	1	1	1	#N/A
TMEM200B	NA	0	0	0	#N/A
SRSF4	1	0	6	0	#N/A
MECR	1	0	0	4	#N/A
PTPRU	NA	0	0	0	#N/A
MATN1	NA	0	0	0	#N/A
LAPTM5	0	6	0	0	#N/A
SDC3	1	0	1	0	#N/A
PUM1	0	6	0	0	#N/A
NKAIN1	NA	0	0	0	#N/A
SNRNP40	1	0	4	0	#N/A
ZCCHC17	1	0	3	0	#N/A
FABP3	3	0	1	2	#N/A
SERINC2	1	0	1	0	#N/A
TINAGL1	NA	0	0	0	#N/A
PEF1	2	1	4	0	#N/A
COL16A1	NA	0	0	0	#N/A
ADGRB2	NA	0	0	0	#N/A
PTP4A2	0	6	0	0	#N/A
KHDRBS1	2	4	2	0	#N/A
TMEM39B	NA	0	0	0	#N/A
KPNA6	2	2	2	1	#N/A
TXLNA	1	0	0	2	#N/A
CCDC28B	1	0	1	0	#N/A
IQCC	NA	0	0	0	#N/A
DCDC2B	NA	0	0	0	#N/A
TMEM234	NA	0	0	0	#N/A
EIF3I	0	6	0	0	#N/A
FAM167B	NA	0	0	0	#N/A
LCK	NA	0	0	0	Other
HDAC1	2	1	5	0	#N/A
MARCKSL1	2	4	1	0	#N/A
TSSK3	NA	0	0	0	#N/A
FAM229A	NA	0	0	0	#N/A
BSDC1	1	0	1	0	#N/A
ZBTB8B	NA	0	0	0	#N/A
ZBTB8A	NA	0	0	0	#N/A
ZBTB8OS	1	0	5	0	#N/A
RBBP4	2	5	1	0	#N/A
SYNC	NA	0	0	0	#N/A
KIAA1522	NA	0	0	0	#N/A
YARS	1	0	1	0	#N/A
FNDC5	NA	0	0	0	#N/A
HPCA	NA	0	0	0	#N/A
RNF19B	2	1	1	2	#N/A
AK2	2	4	2	0	#N/A
AZIN2	NA	0	0	0	#N/A
TRIM62	NA	0	0	0	#N/A
ZNF362	NA	0	0	0	#N/A
PHC2	1	0	4	0	#N/A
CSMD2	NA	0	0	0	#N/A
C1orf94	NA	0	0	0	#N/A
SMIM12	2	2	3	0	#N/A
GJB5	NA	0	0	0	#N/A
GJB3	NA	0	0	0	#N/A
GJA4	1	0	1	0	#N/A
DLGAP3	NA	0	0	0	#N/A
TMEM35B	1	0	2	0	#N/A
SFPQ	0	6	0	0	#N/A
ZMYM4	1	0	2	0	#N/A
KIAA0319L	3	0	1	2	#N/A
NCDN	NA	0	0	0	#N/A
TFAP2E	NA	0	0	0	#N/A
PSMB2	0	6	0	0	#N/A
C1orf216	NA	0	0	0	#N/A
CLSPN	NA	0	0	0	#N/A
AGO4	2	1	3	0	#N/A
AGO1	NA	0	0	0	#N/A
AGO3	2	1	3	1	#N/A
TEKT2	NA	0	0	0	#N/A
ADPRHL2	NA	0	0	0	#N/A
COL8A2	NA	0	0	0	#N/A
TRAPPC3	2	4	2	0	#N/A
MAP7D1	2	1	5	0	#N/A
THRAP3	0	6	0	0	#N/A
EVA1B	NA	0	0	0	#N/A
STK40	2	1	2	1	#N/A
LSM10	1	0	6	0	#N/A
OSCP1	NA	0	0	0	#N/A
MRPS15	2	4	2	0	#N/A
CSF3R	2	1	1	0	CD molecules
GRIK3	NA	0	0	0	#N/A
ZC3H12A	2	2	4	0	#N/A
MEAF6	2	5	1	0	#N/A
SNIP1	1	0	0	1	#N/A
DNALI1	NA	0	0	0	#N/A
GNL2	3	0	1	1	#N/A
RSPO1	NA	0	0	0	#N/A
CDCA8	NA	0	0	0	#N/A
EPHA10	NA	0	0	0	#N/A
MANEAL	NA	0	0	0	#N/A
YRDC	1	0	1	0	#N/A
MTF1	3	0	2	1	#N/A
INPP5B	NA	0	0	0	#N/A
SF3A3	2	2	2	1	#N/A
FHL3	1	0	1	0	#N/A
UTP11	1	0	1	0	#N/A
POU3F1	NA	0	0	0	#N/A
RRAGC	1	0	4	0	#N/A
MYCBP	2	4	2	0	#N/A
GJA9	NA	0	0	0	#N/A
NDUFS5	0	6	0	0	#N/A
MACF1	2	4	1	1	#N/A
BMP8A	NA	0	0	0	#N/A
PABPC4	1	0	6	0	#N/A
HEYL	NA	0	0	0	#N/A
NT5C1A	NA	0	0	0	#N/A
PPIE	3	0	1	3	#N/A
TRIT1	NA	0	0	0	#N/A
MYCL	1	0	2	0	#N/A
MFSD2A	1	0	0	3	#N/A
CAP1	0	6	0	0	#N/A
PPT1	2	4	2	0	#N/A
RLF	3	0	1	4	#N/A
ZMPSTE24	3	0	1	1	#N/A
COL9A2	NA	0	0	0	#N/A
SMAP2	2	5	1	0	#N/A
RIMS3	NA	0	0	0	#N/A
NFYC	2	2	3	0	#N/A
KCNQ4	NA	0	0	0	#N/A
CITED4	2	1	4	0	#N/A
CTPS1	NA	0	0	0	#N/A
SCMH1	NA	0	0	0	#N/A
FOXO6	NA	0	0	0	#N/A
EDN2	NA	0	0	0	#N/A
HIVEP3	1	0	0	5	#N/A
GUCA2B	NA	0	0	0	#N/A
FOXJ3	NA	0	0	0	#N/A
ZMYND12	NA	0	0	0	#N/A
PPCS	2	1	5	0	#N/A
CCDC30	NA	0	0	0	#N/A
PPIH	3	0	2	2	#N/A
YBX1	0	6	0	0	#N/A
CLDN19	NA	0	0	0	#N/A
P3H1	0	1	0	0	#N/A
C1orf50	NA	0	0	0	#N/A
TMEM269	NA	0	0	0	#N/A
SVBP	2	5	1	0	#N/A
SLC2A1	1	0	1	0	#N/A
FAM183A	NA	0	0	0	#N/A
EBNA1BP2	3	0	1	1	#N/A
CFAP57	NA	0	0	0	#N/A
TMEM125	NA	0	0	0	#N/A
C1orf210	NA	0	0	0	#N/A
TIE1	NA	0	0	0	#N/A
MPL	NA	0	0	0	CD molecules
CDC20	NA	0	0	0	#N/A
ELOVL1	2	3	1	0	#N/A
MED8	1	0	2	0	#N/A
SZT2	NA	0	0	0	#N/A
HYI	1	0	1	0	#N/A
PTPRF	1	0	1	0	#N/A
KDM4A	1	0	0	1	#N/A
ST3GAL3	NA	0	0	0	#N/A
ARTN	NA	0	0	0	#N/A
IPO13	NA	0	0	0	#N/A
DPH2	NA	0	0	0	#N/A
ATP6V0B	0	6	0	0	#N/A
B4GALT2	NA	0	0	0	#N/A
SLC6A9	NA	0	0	0	#N/A
DMAP1	NA	0	0	0	#N/A
ERI3	NA	0	0	0	#N/A
RNF220	2	1	1	4	#N/A
TMEM53	1	0	1	0	#N/A
KIF2C	1	0	0	1	#N/A
RPS8	2	5	1	0	#N/A
BEST4	NA	0	0	0	#N/A
PLK3	2	4	2	0	Other
TCTEX1D4	NA	0	0	0	#N/A
BTBD19	NA	0	0	0	#N/A
PTCH2	NA	0	0	0	#N/A
EIF2B3	1	0	0	1	#N/A
HECTD3	NA	0	0	0	#N/A
UROD	1	0	3	0	#N/A
ZSWIM5	NA	0	0	0	#N/A
HPDL	NA	0	0	0	#N/A
MUTYH	NA	0	0	0	#N/A
TOE1	NA	0	0	0	#N/A
TESK2	NA	0	0	0	#N/A
MMACHC	NA	0	0	0	#N/A
PRDX1	0	6	0	0	#N/A
AKR1A1	2	3	3	0	#N/A
NASP	1	0	5	0	#N/A
CCDC17	NA	0	0	0	#N/A
GPBP1L1	0	6	0	0	#N/A
TMEM69	NA	0	0	0	#N/A
IPP	NA	0	0	0	#N/A
MAST2	NA	0	0	0	#N/A
PIK3R3	NA	0	0	0	#N/A
TSPAN1	NA	0	0	0	#N/A
POMGNT1	NA	0	0	0	#N/A
LURAP1	NA	0	0	0	#N/A
RAD54L	NA	0	0	0	#N/A
LRRC41	NA	0	0	0	#N/A
NSUN4	NA	0	0	0	#N/A
FAAH	1	0	0	1	#N/A
DMBX1	NA	0	0	0	#N/A
MKNK1	1	0	3	0	#N/A
MOB3C	1	0	0	4	#N/A
ATPAF1	NA	0	0	0	#N/A
EFCAB14	2	1	5	0	#N/A
CYP4A11	NA	0	0	0	#N/A
CYP4A22	NA	0	0	0	#N/A
PDZK1IP1	NA	0	0	0	#N/A
TAL1	1	0	0	1	Transcription factor
STIL	NA	0	0	0	#N/A
CMPK1	1	0	6	0	#N/A
FOXE3	NA	0	0	0	#N/A
FOXD2	NA	0	0	0	#N/A
TRABD2B	NA	0	0	0	#N/A
SLC5A9	NA	0	0	0	#N/A
SPATA6	NA	0	0	0	#N/A
BEND5	1	0	0	1	#N/A
ELAVL4	NA	0	0	0	#N/A
DMRTA2	NA	0	0	0	#N/A
FAF1	NA	0	0	0	#N/A
CDKN2C	1	0	1	0	#N/A
RNF11	2	4	2	0	#N/A
TTC39A	1	0	0	1	#N/A
EPS15	2	3	2	1	#N/A
OSBPL9	2	4	2	0	#N/A
NRDC	2	1	5	0	#N/A
RAB3B	NA	0	0	0	#N/A
TXNDC12	1	0	5	0	#N/A
KTI12	NA	0	0	0	#N/A
BTF3L4	0	6	0	0	#N/A
ZFYVE9	NA	0	0	0	#N/A
ORC1	NA	0	0	0	#N/A
PRPF38A	1	0	4	0	#N/A
GPX7	1	0	1	0	#N/A
SHISAL2A	NA	0	0	0	#N/A
COA7	NA	0	0	0	#N/A
ZYG11B	1	0	2	0	#N/A
ZYG11A	NA	0	0	0	#N/A
ECHDC2	1	0	1	0	#N/A
SCP2	2	5	1	0	#N/A
PODN	NA	0	0	0	#N/A
SLC1A7	NA	0	0	0	#N/A
CPT2	NA	0	0	0	#N/A
MAGOH	0	6	0	0	#N/A
LRP8	NA	0	0	0	#N/A
DMRTB1	NA	0	0	0	#N/A
GLIS1	NA	0	0	0	#N/A
NDC1	NA	0	0	0	#N/A
YIPF1	1	0	0	4	#N/A
DIO1	NA	0	0	0	#N/A
HSPB11	1	0	5	0	#N/A
LRRC42	NA	0	0	0	#N/A
LDLRAD1	1	0	0	6	#N/A
TMEM59	1	0	6	0	#N/A
TCEANC2	NA	0	0	0	#N/A
CDCP2	NA	0	0	0	#N/A
MRPL37	1	0	3	0	#N/A
SSBP3	NA	0	0	0	#N/A
ACOT11	NA	0	0	0	#N/A
TTC4	NA	0	0	0	#N/A
PARS2	NA	0	0	0	#N/A
LEXM	NA	0	0	0	#N/A
DHCR24	NA	0	0	0	#N/A
TMEM61	NA	0	0	0	#N/A
BSND	NA	0	0	0	#N/A
PCSK9	NA	0	0	0	#N/A
USP24	3	0	1	4	#N/A
PLPP3	2	1	1	0	#N/A
PRKAA2	NA	0	0	0	#N/A
FYB2	NA	0	0	0	#N/A
C8A	NA	0	0	0	Complement system
C8B	NA	0	0	0	Complement system
DAB1	1	0	0	1	#N/A
OMA1	NA	0	0	0	#N/A
TACSTD2	1	0	1	0	#N/A
MYSM1	1	0	1	0	#N/A
JUN	0	6	0	0	#N/A
FGGY	1	0	0	5	#N/A
HOOK1	NA	0	0	0	#N/A
NFIA	1	0	2	0	#N/A
TM2D1	1	0	5	0	#N/A
PATJ	NA	0	0	0	#N/A
KANK4	NA	0	0	0	#N/A
USP1	1	0	1	0	#N/A
DOCK7	2	1	1	0	#N/A
ANGPTL3	NA	0	0	0	#N/A
ATG4C	NA	0	0	0	#N/A
FOXD3	NA	0	0	0	#N/A
ALG6	NA	0	0	0	#N/A
ITGB3BP	NA	0	0	0	#N/A
EFCAB7	NA	0	0	0	#N/A
PGM1	3	0	1	1	#N/A
ROR1	NA	0	0	0	#N/A
UBE2U	NA	0	0	0	#N/A
CACHD1	NA	0	0	0	#N/A
RAVER2	NA	0	0	0	#N/A
JAK1	0	6	0	0	Other
AK4	NA	0	0	0	#N/A
DNAJC6	NA	0	0	0	#N/A
LEPROT	2	2	4	0	#N/A
LEPR	NA	0	0	0	#N/A
PDE4B	2	3	2	0	#N/A
SGIP1	NA	0	0	0	#N/A
TCTEX1D1	NA	0	0	0	#N/A
INSL5	NA	0	0	0	#N/A
WDR78	NA	0	0	0	#N/A
MIER1	2	3	2	0	#N/A
SLC35D1	NA	0	0	0	#N/A
IL23R	NA	0	0	0	Chemokines and recptors
IL12RB2	NA	0	0	0	Chemokines and recptors
SERBP1	0	6	0	0	#N/A
GADD45A	2	1	2	0	#N/A
GNG12	NA	0	0	0	#N/A
WLS	1	0	1	0	#N/A
RPE65	NA	0	0	0	#N/A
DEPDC1	NA	0	0	0	#N/A
LRRC7	NA	0	0	0	#N/A
LRRC40	NA	0	0	0	#N/A
SRSF11	0	6	0	0	#N/A
ANKRD13C	NA	0	0	0	#N/A
CTH	NA	0	0	0	#N/A
PTGER3	NA	0	0	0	#N/A
ZRANB2	1	0	6	0	#N/A
NEGR1	1	0	1	0	#N/A
FPGT	NA	0	0	0	#N/A
TNNI3K	NA	0	0	0	#N/A
ERICH3	1	0	1	0	#N/A
CRYZ	NA	0	0	0	#N/A
TYW3	1	0	3	0	#N/A
LHX8	NA	0	0	0	#N/A
SLC44A5	NA	0	0	0	#N/A
RABGGTB	1	0	4	0	#N/A
MSH4	NA	0	0	0	#N/A
ST6GALNAC3	NA	0	0	0	#N/A
ST6GALNAC5	NA	0	0	0	#N/A
PIGK	1	0	0	2	#N/A
AK5	NA	0	0	0	#N/A
USP33	3	0	3	1	#N/A
MIGA1	NA	0	0	0	#N/A
NEXN	NA	0	0	0	#N/A
FUBP1	2	5	1	0	#N/A
DNAJB4	3	0	1	2	#N/A
GIPC2	NA	0	0	0	#N/A
PTGFR	NA	0	0	0	#N/A
ADGRL4	NA	0	0	0	#N/A
ADGRL2	NA	0	0	0	#N/A
TTLL7	NA	0	0	0	#N/A
PRKACB	2	1	5	0	#N/A
SAMD13	NA	0	0	0	#N/A
DNASE2B	1	0	0	4	#N/A
RPF1	1	0	1	0	#N/A
GNG5	0	6	0	0	#N/A
SPATA1	NA	0	0	0	#N/A
CTBS	1	0	5	0	#N/A
SSX2IP	NA	0	0	0	#N/A
LPAR3	1	0	0	1	#N/A
MCOLN2	3	0	1	1	#N/A
WDR63	NA	0	0	0	#N/A
MCOLN3	NA	0	0	0	#N/A
SYDE2	1	0	0	1	#N/A
C1orf52	1	0	3	0	#N/A
BCL10	1	0	4	0	#N/A
DDAH1	1	0	0	1	#N/A
CYR61	NA	0	0	0	#N/A
ZNHIT6	NA	0	0	0	#N/A
COL24A1	NA	0	0	0	#N/A
ODF2L	1	0	1	0	#N/A
CLCA2	NA	0	0	0	#N/A
CLCA1	NA	0	0	0	#N/A
SH3GLB1	2	4	2	0	#N/A
SELENOF	0	6	0	0	#N/A
HS2ST1	NA	0	0	0	#N/A
LMO4	2	1	5	0	#N/A
PKN2	2	5	1	0	#N/A
GTF2B	2	3	2	1	#N/A
KYAT3	NA	0	0	0	#N/A
RBMXL1	1	0	0	6	#N/A
GBP1	2	2	3	0	#N/A
LRRC8C	NA	0	0	0	#N/A
LRRC8D	1	0	0	2	#N/A
ZNF326	2	4	2	0	#N/A
BARHL2	NA	0	0	0	#N/A
ZNF644	2	5	1	0	#N/A
HFM1	NA	0	0	0	#N/A
CDC7	NA	0	0	0	#N/A
TGFBR3	NA	0	0	0	#N/A
BRDT	NA	0	0	0	#N/A
EPHX4	NA	0	0	0	#N/A
BTBD8	NA	0	0	0	#N/A
C1orf146	NA	0	0	0	#N/A
GLMN	NA	0	0	0	#N/A
RPAP2	NA	0	0	0	#N/A
GFI1	NA	0	0	0	Transcription factor
EVI5	2	2	1	1	#N/A
RPL5	2	5	1	0	#N/A
FAM69A	NA	0	0	0	#N/A
MTF2	2	2	1	0	#N/A
TMED5	2	4	1	1	#N/A
CCDC18	NA	0	0	0	#N/A
DR1	1	0	6	0	#N/A
FNBP1L	1	0	0	1	#N/A
BCAR3	NA	0	0	0	#N/A
DNTTIP2	2	1	4	0	#N/A
GCLM	1	0	0	3	#N/A
ABCA4	NA	0	0	0	#N/A
ARHGAP29	1	0	0	1	#N/A
ABCD3	NA	0	0	0	#N/A
F3	NA	0	0	0	CD molecules
SLC44A3	NA	0	0	0	#N/A
CNN3	1	0	1	0	#N/A
ALG14	NA	0	0	0	#N/A
RWDD3	NA	0	0	0	#N/A
PTBP2	NA	0	0	0	#N/A
DPYD	1	0	3	0	#N/A
SNX7	NA	0	0	0	#N/A
PLPPR5	NA	0	0	0	#N/A
PLPPR4	NA	0	0	0	#N/A
PALMD	NA	0	0	0	#N/A
FRRS1	NA	0	0	0	#N/A
AGL	NA	0	0	0	#N/A
SLC35A3	NA	0	0	0	#N/A
MFSD14A	1	0	1	0	#N/A
SASS6	NA	0	0	0	#N/A
TRMT13	NA	0	0	0	#N/A
LRRC39	NA	0	0	0	#N/A
DBT	NA	0	0	0	#N/A
RTCA	1	0	4	0	#N/A
CDC14A	NA	0	0	0	#N/A
GPR88	NA	0	0	0	#N/A
VCAM1	2	1	3	0	CD molecules
EXTL2	NA	0	0	0	#N/A
SLC30A7	3	0	2	1	#N/A
DPH5	NA	0	0	0	#N/A
S1PR1	NA	0	0	0	#N/A
OLFM3	NA	0	0	0	#N/A
COL11A1	NA	0	0	0	#N/A
RNPC3	1	0	1	0	#N/A
AMY2A	NA	0	0	0	#N/A
AMY1A	NA	0	0	0	#N/A
NTNG1	NA	0	0	0	#N/A
VAV3	3	0	1	4	#N/A
SLC25A24	2	1	3	2	#N/A
FAM102B	2	1	2	0	#N/A
HENMT1	NA	0	0	0	#N/A
PRPF38B	0	6	0	0	#N/A
FNDC7	NA	0	0	0	#N/A
STXBP3	1	0	4	0	#N/A
AKNAD1	NA	0	0	0	#N/A
GPSM2	NA	0	0	0	#N/A
CLCC1	NA	0	0	0	#N/A
WDR47	NA	0	0	0	#N/A
TAF13	2	1	2	0	#N/A
TMEM167B	2	2	2	2	#N/A
CELSR2	1	0	0	1	#N/A
PSRC1	NA	0	0	0	#N/A
MYBPHL	NA	0	0	0	#N/A
SORT1	1	0	3	0	#N/A
PSMA5	0	6	0	0	#N/A
SYPL2	NA	0	0	0	#N/A
ATXN7L2	NA	0	0	0	#N/A
AMIGO1	NA	0	0	0	#N/A
GPR61	NA	0	0	0	#N/A
GNAI3	0	6	0	0	#N/A
GNAT2	NA	0	0	0	#N/A
AMPD2	1	0	3	0	#N/A
GSTM4	2	1	5	0	#N/A
GSTM2	1	0	0	6	#N/A
CSF1	1	0	0	3	Chemokines and recptors
AHCYL1	2	1	4	1	#N/A
STRIP1	NA	0	0	0	#N/A
SLC6A17	NA	0	0	0	#N/A
KCNC4	1	0	1	0	#N/A
RBM15	NA	0	0	0	#N/A
SLC16A4	NA	0	0	0	#N/A
LAMTOR5	2	4	2	0	#N/A
PROK1	NA	0	0	0	#N/A
KCNA10	NA	0	0	0	#N/A
KCNA2	NA	0	0	0	#N/A
KCNA3	1	0	0	4	#N/A
LRIF1	NA	0	0	0	#N/A
DRAM2	2	3	3	0	#N/A
CEPT1	1	0	2	0	#N/A
DENND2D	NA	0	0	0	#N/A
CHIA	NA	0	0	0	#N/A
PIFO	NA	0	0	0	#N/A
WDR77	NA	0	0	0	#N/A
ATP5PB	0	6	0	0	#N/A
ADORA3	NA	0	0	0	#N/A
RAP1A	0	6	0	0	#N/A
DDX20	NA	0	0	0	#N/A
KCND3	1	0	0	1	#N/A
CTTNBP2NL	2	1	2	0	#N/A
WNT2B	NA	0	0	0	#N/A
ST7L	1	0	0	1	#N/A
CAPZA1	0	6	0	0	#N/A
MOV10	1	0	0	1	#N/A
RHOC	1	0	5	0	#N/A
PPM1J	2	1	1	0	#N/A
FAM19A3	1	0	0	1	#N/A
SLC16A1	NA	0	0	0	#N/A
LRIG2	NA	0	0	0	#N/A
MAGI3	NA	0	0	0	#N/A
PHTF1	NA	0	0	0	#N/A
RSBN1	NA	0	0	0	#N/A
PTPN22	3	0	1	1	Other
BCL2L15	1	0	0	2	#N/A
AP4B1	NA	0	0	0	#N/A
DCLRE1B	NA	0	0	0	#N/A
HIPK1	2	4	1	0	#N/A
OLFML3	NA	0	0	0	#N/A
SYT6	NA	0	0	0	#N/A
TRIM33	1	0	4	0	#N/A
BCAS2	2	4	2	0	#N/A
DENND2C	NA	0	0	0	#N/A
AMPD1	NA	0	0	0	#N/A
NRAS	2	1	3	0	Other
CSDE1	0	6	0	0	#N/A
SIKE1	NA	0	0	0	#N/A
SYCP1	NA	0	0	0	#N/A
TSPAN2	NA	0	0	0	#N/A
NGF	NA	0	0	0	#N/A
VANGL1	NA	0	0	0	#N/A
CASQ2	NA	0	0	0	#N/A
NHLH2	NA	0	0	0	#N/A
SLC22A15	NA	0	0	0	#N/A
MAB21L3	NA	0	0	0	#N/A
ATP1A1	0	6	0	0	#N/A
IGSF3	NA	0	0	0	#N/A
CD2	1	0	0	2	CD molecules
PTGFRN	NA	0	0	0	Inflammation
CD101	NA	0	0	0	#N/A
TTF2	NA	0	0	0	#N/A
TRIM45	NA	0	0	0	#N/A
VTCN1	NA	0	0	0	#N/A
MAN1A2	2	1	4	0	#N/A
TENT5C	1	0	1	0	#N/A
GDAP2	3	0	1	1	#N/A
WDR3	NA	0	0	0	#N/A
SPAG17	NA	0	0	0	#N/A
TBX15	NA	0	0	0	#N/A
HAO2	NA	0	0	0	#N/A
HSD3B1	NA	0	0	0	#N/A
PHGDH	NA	0	0	0	#N/A
HMGCS2	NA	0	0	0	#N/A
REG4	NA	0	0	0	#N/A
NOTCH2	2	2	3	0	#N/A
SEC22B	3	0	3	2	#N/A
GPR89A	NA	0	0	0	#N/A
POLR3C	NA	0	0	0	#N/A
PIAS3	NA	0	0	0	#N/A
PEX11B	NA	0	0	0	#N/A
RBM8A	1	0	6	0	#N/A
POLR3GL	1	0	4	0	#N/A
PRKAB2	NA	0	0	0	#N/A
CHD1L	NA	0	0	0	#N/A
BCL9	NA	0	0	0	#N/A
ACP6	NA	0	0	0	#N/A
GJA5	NA	0	0	0	#N/A
GJA8	NA	0	0	0	#N/A
PDE4DIP	1	0	3	0	#N/A
HIST2H3D	NA	0	0	0	#N/A
HIST2H3A	NA	0	0	0	#N/A
HIST2H4B	1	0	0	1	#N/A
SF3B4	1	0	5	0	#N/A
MTMR11	NA	0	0	0	#N/A
OTUD7B	NA	0	0	0	#N/A
VPS45	NA	0	0	0	#N/A
PLEKHO1	2	3	3	0	#N/A
ANP32E	2	3	2	0	#N/A
CA14	NA	0	0	0	#N/A
APH1A	1	0	6	0	#N/A
CIART	NA	0	0	0	#N/A
MRPS21	0	6	0	0	#N/A
PRPF3	NA	0	0	0	#N/A
RPRD2	NA	0	0	0	#N/A
TARS2	NA	0	0	0	#N/A
ECM1	1	0	0	3	#N/A
MCL1	0	6	0	0	#N/A
ENSA	2	1	5	0	#N/A
GOLPH3L	NA	0	0	0	#N/A
HORMAD1	NA	0	0	0	#N/A
CTSS	0	6	0	0	Cellular Immunity
CTSK	3	0	1	1	#N/A
ARNT	1	0	1	0	#N/A
SETDB1	NA	0	0	0	#N/A
CERS2	2	2	1	0	#N/A
PRUNE1	NA	0	0	0	#N/A
CDC42SE1	2	3	3	0	#N/A
MLLT11	NA	0	0	0	#N/A
GABPB2	1	0	0	1	#N/A
SEMA6C	NA	0	0	0	#N/A
SCNM1	1	0	5	0	#N/A
LYSMD1	NA	0	0	0	#N/A
TMOD4	NA	0	0	0	#N/A
VPS72	NA	0	0	0	#N/A
PIP5K1A	NA	0	0	0	#N/A
PSMD4	0	6	0	0	#N/A
ZNF687	NA	0	0	0	#N/A
PI4KB	1	0	2	0	#N/A
RFX5	NA	0	0	0	Transcription factor
SELENBP1	NA	0	0	0	#N/A
PSMB4	0	6	0	0	#N/A
POGZ	1	0	4	0	#N/A
CGN	NA	0	0	0	#N/A
TUFT1	NA	0	0	0	#N/A
SNX27	2	2	3	0	#N/A
CELF3	NA	0	0	0	#N/A
RIIAD1	NA	0	0	0	#N/A
MRPL9	3	0	4	1	#N/A
TDRKH	NA	0	0	0	#N/A
RORC	NA	0	0	0	#N/A
THEM4	1	0	1	0	#N/A
S100A10	0	6	0	0	#N/A
S100A11	2	3	3	0	#N/A
CRNN	NA	0	0	0	#N/A
S100A12	0	1	0	0	#N/A
S100A6	2	4	2	0	#N/A
S100A4	1	0	6	0	#N/A
S100A16	1	0	1	0	#N/A
S100A14	NA	0	0	0	#N/A
S100A13	2	1	1	4	#N/A
S100A1	1	0	1	0	#N/A
CHTOP	2	4	2	0	#N/A
SNAPIN	2	1	3	0	#N/A
ILF2	0	6	0	0	Chemokines and recptors
NPR1	NA	0	0	0	#N/A
INTS3	NA	0	0	0	#N/A
GATAD2B	1	0	5	0	#N/A
CREB3L4	1	0	0	4	#N/A
JTB	0	6	0	0	#N/A
RPS27	2	5	1	0	#N/A
NUP210L	NA	0	0	0	#N/A
TPM3	0	6	0	0	#N/A
C1orf43	2	2	4	0	#N/A
UBAP2L	1	0	3	0	#N/A
HAX1	1	0	5	0	Other
ATP8B2	NA	0	0	0	#N/A
IL6R	2	2	2	0	CD molecules
SHE	NA	0	0	0	#N/A
UBE2Q1	2	4	2	0	#N/A
CHRNB2	NA	0	0	0	#N/A
ADAR	1	0	6	0	#N/A
KCNN3	NA	0	0	0	#N/A
PMVK	3	0	4	1	#N/A
PBXIP1	NA	0	0	0	#N/A
PYGO2	NA	0	0	0	#N/A
SHC1	1	0	2	0	#N/A
CKS1B	1	0	2	0	#N/A
FLAD1	NA	0	0	0	#N/A
ZBTB7B	NA	0	0	0	#N/A
DCST2	NA	0	0	0	#N/A
ADAM15	3	0	2	1	#N/A
MUC1	NA	0	0	0	CD molecules
GBA	1	0	1	0	#N/A
FAM189B	NA	0	0	0	#N/A
SCAMP3	1	0	3	0	#N/A
CLK2	NA	0	0	0	#N/A
HCN3	NA	0	0	0	#N/A
PKLR	1	0	0	6	#N/A
FDPS	1	0	6	0	#N/A
RUSC1	1	0	1	0	#N/A
ASH1L	0	6	0	0	#N/A
MSTO1	NA	0	0	0	#N/A
DAP3	1	0	6	0	#N/A
GON4L	1	0	1	0	#N/A
SYT11	NA	0	0	0	#N/A
RIT1	2	2	1	3	#N/A
KHDC4	1	0	2	0	#N/A
ARHGEF2	1	0	5	0	#N/A
SSR2	0	6	0	0	#N/A
UBQLN4	1	0	0	3	#N/A
LAMTOR2	0	6	0	0	#N/A
RAB25	NA	0	0	0	#N/A
MEX3A	NA	0	0	0	#N/A
LMNA	1	0	4	0	#N/A
BGLAP	NA	0	0	0	#N/A
SMG5	NA	0	0	0	#N/A
TMEM79	NA	0	0	0	#N/A
GLMP	2	1	2	2	#N/A
CCT3	2	3	3	0	#N/A
RHBG	1	0	0	1	#N/A
MEF2D	2	4	2	0	#N/A
IQGAP3	1	0	0	6	#N/A
TTC24	NA	0	0	0	#N/A
GPATCH4	2	1	5	0	#N/A
HAPLN2	NA	0	0	0	#N/A
BCAN	NA	0	0	0	#N/A
NES	NA	0	0	0	#N/A
CRABP2	NA	0	0	0	#N/A
ISG20L2	1	0	1	0	#N/A
RRNAD1	NA	0	0	0	#N/A
MRPL24	2	1	5	0	#N/A
HDGF	0	6	0	0	#N/A
PRCC	1	0	1	0	#N/A
SH2D2A	NA	0	0	0	#N/A
NTRK1	NA	0	0	0	#N/A
INSRR	NA	0	0	0	#N/A
PEAR1	NA	0	0	0	#N/A
LRRC71	NA	0	0	0	#N/A
ARHGEF11	NA	0	0	0	#N/A
ETV3L	NA	0	0	0	#N/A
ETV3	2	1	5	0	#N/A
FCRL4	NA	0	0	0	#N/A
KIRREL1	NA	0	0	0	#N/A
CD1C	NA	0	0	0	CD molecules
CD1B	1	0	0	1	CD molecules
CADM3	NA	0	0	0	#N/A
ACKR1	1	0	1	0	#N/A
CRP	NA	0	0	0	Inflammation
DUSP23	2	3	1	2	#N/A
SLAMF8	2	1	1	1	#N/A
VSIG8	NA	0	0	0	#N/A
CFAP45	NA	0	0	0	#N/A
TAGLN2	1	0	6	0	#N/A
IGSF9	NA	0	0	0	#N/A
PIGM	NA	0	0	0	#N/A
DCAF8	NA	0	0	0	#N/A
COPA	0	6	0	0	#N/A
NCSTN	1	0	3	0	#N/A
NHLH1	NA	0	0	0	#N/A
VANGL2	NA	0	0	0	#N/A
SLAMF1	1	0	0	1	CD molecules
CD48	2	2	4	0	CD molecules
CD244	1	0	0	2	CD molecules
F11R	1	0	4	0	#N/A
TSTD1	1	0	3	0	#N/A
USF1	NA	0	0	0	#N/A
PFDN2	1	0	6	0	#N/A
NIT1	NA	0	0	0	#N/A
DEDD	NA	0	0	0	#N/A
UFC1	1	0	6	0	#N/A
USP21	NA	0	0	0	#N/A
PPOX	NA	0	0	0	#N/A
B4GALT3	1	0	1	0	#N/A
ADAMTS4	NA	0	0	0	#N/A
NDUFS2	0	6	0	0	#N/A
FCER1G	2	5	1	0	Other
APOA2	1	0	0	1	#N/A
TOMM40L	NA	0	0	0	#N/A
NR1I3	NA	0	0	0	#N/A
PCP4L1	NA	0	0	0	#N/A
MPZ	NA	0	0	0	#N/A
SDHC	2	4	2	0	#N/A
CFAP126	NA	0	0	0	#N/A
FCRLB	NA	0	0	0	#N/A
DUSP12	NA	0	0	0	#N/A
OLFML2B	NA	0	0	0	#N/A
NOS1AP	NA	0	0	0	#N/A
SPATA46	NA	0	0	0	#N/A
SH2D1B	NA	0	0	0	#N/A
UHMK1	1	0	5	0	#N/A
UAP1	3	0	1	2	#N/A
DDR2	1	0	1	0	#N/A
HSD17B7	1	0	0	1	#N/A
RGS4	1	0	0	5	#N/A
RGS5	NA	0	0	0	#N/A
NUF2	NA	0	0	0	#N/A
PBX1	1	0	1	0	#N/A
LMX1A	NA	0	0	0	#N/A
RXRG	NA	0	0	0	#N/A
LRRC52	NA	0	0	0	#N/A
MGST3	2	4	2	0	#N/A
ALDH9A1	3	0	3	1	#N/A
TMCO1	2	3	3	0	#N/A
UCK2	3	0	1	1	#N/A
FAM78B	NA	0	0	0	#N/A
TADA1	NA	0	0	0	#N/A
ILDR2	NA	0	0	0	#N/A
MAEL	NA	0	0	0	#N/A
GPA33	NA	0	0	0	#N/A
DUSP27	NA	0	0	0	#N/A
POU2F1	2	1	2	0	#N/A
CD247	NA	0	0	0	CD molecules
CREG1	2	5	1	0	#N/A
RCSD1	2	4	1	0	#N/A
MPZL1	3	0	1	4	#N/A
MPC2	0	6	0	0	#N/A
DCAF6	3	0	1	3	#N/A
GPR161	NA	0	0	0	#N/A
TIPRL	1	0	3	0	#N/A
SFT2D2	1	0	6	0	#N/A
TBX19	NA	0	0	0	#N/A
XCL1	NA	0	0	0	Chemokines and recptors
DPT	NA	0	0	0	#N/A
ATP1B1	2	2	4	0	#N/A
NME7	1	0	0	1	#N/A
BLZF1	NA	0	0	0	#N/A
CCDC181	NA	0	0	0	#N/A
SLC19A2	NA	0	0	0	#N/A
F5	3	0	1	1	#N/A
SELP	1	0	0	2	CD molecules
C1orf112	NA	0	0	0	#N/A
SELE	NA	0	0	0	CD molecules
METTL18	NA	0	0	0	#N/A
SCYL3	NA	0	0	0	#N/A
KIFAP3	NA	0	0	0	#N/A
METTL11B	NA	0	0	0	#N/A
GORAB	NA	0	0	0	#N/A
PRRX1	1	0	1	0	#N/A
FMO3	NA	0	0	0	#N/A
FMO4	NA	0	0	0	#N/A
PRRC2C	0	6	0	0	#N/A
MYOC	NA	0	0	0	#N/A
VAMP4	2	1	2	0	#N/A
METTL13	NA	0	0	0	#N/A
DNM3	NA	0	0	0	#N/A
PIGC	NA	0	0	0	#N/A
SUCO	3	0	2	3	#N/A
FASLG	NA	0	0	0	Chemokines and recptors
TNFSF4	NA	0	0	0	Chemokines and recptors
PRDX6	0	6	0	0	Other
KLHL20	NA	0	0	0	#N/A
CENPL	NA	0	0	0	#N/A
DARS2	NA	0	0	0	#N/A
ZBTB37	NA	0	0	0	#N/A
SERPINC1	NA	0	0	0	#N/A
RC3H1	2	3	1	2	#N/A
RABGAP1L	2	3	2	0	#N/A
GPR52	NA	0	0	0	#N/A
CACYBP	0	6	0	0	#N/A
MRPS14	2	1	1	1	#N/A
TNN	NA	0	0	0	#N/A
KIAA0040	2	1	2	0	#N/A
TNR	NA	0	0	0	#N/A
PAPPA2	NA	0	0	0	#N/A
ASTN1	NA	0	0	0	#N/A
BRINP2	NA	0	0	0	#N/A
SEC16B	NA	0	0	0	#N/A
RALGPS2	1	0	0	1	#N/A
ANGPTL1	NA	0	0	0	#N/A
FAM20B	NA	0	0	0	#N/A
TOR3A	1	0	2	0	#N/A
ABL2	1	0	1	0	#N/A
SOAT1	1	0	3	0	#N/A
AXDND1	1	0	0	1	#N/A
NPHS2	NA	0	0	0	#N/A
TDRD5	NA	0	0	0	#N/A
FAM163A	NA	0	0	0	#N/A
TOR1AIP2	1	0	5	0	#N/A
TOR1AIP1	2	4	2	0	#N/A
CEP350	2	1	5	0	#N/A
QSOX1	1	0	4	0	#N/A
LHX4	NA	0	0	0	#N/A
ACBD6	1	0	1	0	#N/A
XPR1	1	0	0	2	#N/A
KIAA1614	NA	0	0	0	#N/A
STX6	1	0	1	0	#N/A
IER5	2	3	1	2	#N/A
CACNA1E	NA	0	0	0	#N/A
ZNF648	NA	0	0	0	#N/A
GLUL	1	0	4	0	#N/A
RGSL1	NA	0	0	0	#N/A
RNASEL	NA	0	0	0	#N/A
RGS16	NA	0	0	0	#N/A
RGS8	NA	0	0	0	#N/A
NPL	2	3	1	0	#N/A
LAMC1	NA	0	0	0	#N/A
LAMC2	1	0	1	0	#N/A
NMNAT2	NA	0	0	0	#N/A
SMG7	3	0	3	1	#N/A
NCF2	2	3	3	0	Cellular Immunity
ARPC5	2	1	5	0	#N/A
RGL1	3	0	1	1	#N/A
APOBEC4	NA	0	0	0	#N/A
TSEN15	1	0	1	0	#N/A
C1orf21	1	0	1	0	#N/A
EDEM3	1	0	2	0	#N/A
FAM129A	1	0	0	2	#N/A
RNF2	NA	0	0	0	#N/A
TRMT1L	NA	0	0	0	#N/A
SWT1	NA	0	0	0	#N/A
IVNS1ABP	0	4	0	0	#N/A
HMCN1	1	0	1	0	#N/A
PRG4	NA	0	0	0	#N/A
TPR	2	2	4	0	#N/A
ODR4	NA	0	0	0	#N/A
PDC	NA	0	0	0	#N/A
PTGS2	3	0	1	2	#N/A
PLA2G4A	1	0	0	2	#N/A
BRINP3	NA	0	0	0	#N/A
RGS18	2	3	2	0	#N/A
RGS21	NA	0	0	0	#N/A
RGS1	2	4	2	0	#N/A
RGS13	1	0	1	0	#N/A
RGS2	2	4	2	0	#N/A
UCHL5	1	0	0	4	#N/A
TROVE2	1	0	1	0	#N/A
GLRX2	1	0	1	0	#N/A
CDC73	1	0	4	0	#N/A
B3GALT2	NA	0	0	0	#N/A
KCNT2	NA	0	0	0	#N/A
CFH	1	0	0	2	Complement system
F13B	NA	0	0	0	#N/A
ASPM	NA	0	0	0	#N/A
ZBTB41	NA	0	0	0	#N/A
CRB1	NA	0	0	0	#N/A
DENND1B	2	1	5	0	#N/A
C1orf53	NA	0	0	0	#N/A
LHX9	NA	0	0	0	#N/A
NEK7	1	0	2	0	#N/A
ATP6V1G3	NA	0	0	0	#N/A
PTPRC	0	6	0	0	CD molecules
NR5A2	NA	0	0	0	#N/A
KIF14	NA	0	0	0	#N/A
DDX59	NA	0	0	0	#N/A
CAMSAP2	2	1	1	0	#N/A
GPR25	NA	0	0	0	#N/A
KIF21B	NA	0	0	0	#N/A
CACNA1S	NA	0	0	0	#N/A
TMEM9	NA	0	0	0	#N/A
IGFN1	NA	0	0	0	#N/A
PKP1	NA	0	0	0	#N/A
TNNT2	NA	0	0	0	#N/A
LAD1	NA	0	0	0	#N/A
TNNI1	NA	0	0	0	#N/A
PHLDA3	1	0	1	0	#N/A
CSRP1	2	2	1	3	#N/A
NAV1	1	0	1	0	#N/A
IPO9	NA	0	0	0	#N/A
SHISA4	NA	0	0	0	#N/A
LMOD1	NA	0	0	0	#N/A
TIMM17A	2	1	4	0	#N/A
RNPEP	2	1	3	0	#N/A
ELF3	NA	0	0	0	#N/A
GPR37L1	NA	0	0	0	#N/A
ARL8A	1	0	4	0	#N/A
PTPN7	1	0	2	0	#N/A
LGR6	NA	0	0	0	#N/A
UBE2T	NA	0	0	0	#N/A
PPP1R12B	0	1	0	0	#N/A
SYT2	1	0	0	1	#N/A
KDM5B	1	0	2	0	#N/A
RABIF	1	0	1	0	#N/A
KLHL12	NA	0	0	0	#N/A
ADIPOR1	1	0	5	0	#N/A
CYB5R1	3	0	2	1	#N/A
TMEM183A	2	2	4	0	#N/A
PPFIA4	NA	0	0	0	#N/A
MYOG	NA	0	0	0	#N/A
ADORA1	NA	0	0	0	#N/A
MYBPH	NA	0	0	0	#N/A
BTG2	0	6	0	0	#N/A
FMOD	NA	0	0	0	#N/A
PRELP	1	0	1	0	#N/A
OPTC	NA	0	0	0	#N/A
ATP2B4	2	1	5	0	#N/A
ZC3H11A	1	0	0	6	#N/A
SNRPE	0	6	0	0	#N/A
SOX13	NA	0	0	0	#N/A
ETNK2	NA	0	0	0	#N/A
REN	NA	0	0	0	#N/A
GOLT1A	NA	0	0	0	#N/A
PLEKHA6	NA	0	0	0	#N/A
PPP1R15B	2	1	3	1	#N/A
PIK3C2B	NA	0	0	0	#N/A
MDM4	2	3	3	0	#N/A
LRRN2	NA	0	0	0	#N/A
NFASC	1	0	1	0	#N/A
CNTN2	NA	0	0	0	#N/A
TMEM81	NA	0	0	0	#N/A
RBBP5	NA	0	0	0	#N/A
DSTYK	1	0	0	1	#N/A
TMCC2	NA	0	0	0	#N/A
NUAK2	NA	0	0	0	#N/A
KLHDC8A	NA	0	0	0	#N/A
BLACAT1	NA	0	0	0	#N/A
CDK18	NA	0	0	0	#N/A
MFSD4A	NA	0	0	0	#N/A
ELK4	1	0	1	0	#N/A
SLC45A3	1	0	0	6	#N/A
NUCKS1	0	6	0	0	#N/A
RAB29	3	0	3	2	#N/A
SLC41A1	1	0	0	5	#N/A
PM20D1	1	0	0	3	#N/A
SLC26A9	NA	0	0	0	#N/A
RAB7B	3	0	1	1	#N/A
CTSE	NA	0	0	0	#N/A
AVPR1B	NA	0	0	0	#N/A
FAM72A	NA	0	0	0	#N/A
SRGAP2	2	3	3	0	#N/A
IKBKE	1	0	0	1	Other
RASSF5	2	1	4	1	#N/A
EIF2D	NA	0	0	0	#N/A
DYRK3	NA	0	0	0	#N/A
MAPKAPK2	2	5	1	0	#N/A
IL10	NA	0	0	0	Chemokines and recptors
PIGR	1	0	0	1	#N/A
C1orf116	1	0	0	2	#N/A
PFKFB2	NA	0	0	0	#N/A
YOD1	NA	0	0	0	#N/A
CD55	2	1	5	0	CD molecules
CR2	0	1	0	0	CD molecules
CR1	1	0	2	0	CD molecules
CD34	NA	0	0	0	CD molecules
PLXNA2	NA	0	0	0	#N/A
CAMK1G	NA	0	0	0	#N/A
LAMB3	1	0	1	0	#N/A
G0S2	3	0	4	1	#N/A
HSD11B1	NA	0	0	0	#N/A
TRAF3IP3	2	1	2	0	#N/A
C1orf74	NA	0	0	0	#N/A
IRF6	NA	0	0	0	#N/A
UTP25	NA	0	0	0	#N/A
SYT14	NA	0	0	0	#N/A
SERTAD4	NA	0	0	0	#N/A
HHAT	NA	0	0	0	#N/A
KCNH1	NA	0	0	0	#N/A
RCOR3	1	0	0	2	#N/A
TRAF5	2	1	2	0	Other
RD3	NA	0	0	0	#N/A
SLC30A1	3	0	1	2	#N/A
NEK2	NA	0	0	0	#N/A
LPGAT1	1	0	2	0	#N/A
INTS7	NA	0	0	0	#N/A
DTL	NA	0	0	0	#N/A
PPP2R5A	2	1	2	0	#N/A
TMEM206	1	0	0	1	#N/A
NENF	1	0	5	0	#N/A
ATF3	2	5	1	0	#N/A
BATF3	2	1	3	0	#N/A
NSL1	1	0	6	0	#N/A
TATDN3	0	1	0	0	#N/A
VASH2	NA	0	0	0	#N/A
ANGEL2	NA	0	0	0	#N/A
RPS6KC1	NA	0	0	0	#N/A
PROX1	NA	0	0	0	#N/A
SMYD2	NA	0	0	0	#N/A
PTPN14	NA	0	0	0	#N/A
CENPF	NA	0	0	0	#N/A
KCNK2	NA	0	0	0	#N/A
USH2A	NA	0	0	0	#N/A
ESRRG	NA	0	0	0	#N/A
GPATCH2	NA	0	0	0	#N/A
SPATA17	NA	0	0	0	#N/A
RRP15	NA	0	0	0	#N/A
TGFB2	NA	0	0	0	#N/A
LYPLAL1	1	0	1	0	#N/A
SLC30A10	NA	0	0	0	#N/A
EPRS	2	4	1	1	#N/A
BPNT1	NA	0	0	0	#N/A
IARS2	1	0	5	0	#N/A
RAB3GAP2	1	0	0	1	#N/A
MARK1	1	0	0	4	#N/A
2024-03-02	1	0	1	0	#N/A
2024-03-01	1	0	1	0	#N/A
HLX	1	0	1	0	#N/A
DUSP10	2	1	3	0	#N/A
HHIPL2	NA	0	0	0	#N/A
TAF1A	NA	0	0	0	#N/A
MIA3	2	3	2	0	#N/A
AIDA	1	0	2	0	#N/A
BROX	1	0	4	0	#N/A
DISP1	NA	0	0	0	#N/A
TLR5	NA	0	0	0	Cellular Immunity
SUSD4	NA	0	0	0	#N/A
CAPN8	NA	0	0	0	#N/A
CAPN2	3	0	4	1	#N/A
TP53BP2	1	0	3	0	#N/A
FBXO28	NA	0	0	0	#N/A
DEGS1	2	1	2	3	#N/A
NVL	NA	0	0	0	#N/A
CNIH4	1	0	4	0	#N/A
WDR26	2	4	1	1	#N/A
CNIH3	NA	0	0	0	#N/A
DNAH14	NA	0	0	0	#N/A
LBR	2	2	3	1	#N/A
ENAH	0	1	0	0	#N/A
SRP9	2	4	2	0	#N/A
EPHX1	1	0	1	0	#N/A
TMEM63A	1	0	2	0	#N/A
LEFTY1	NA	0	0	0	#N/A
SDE2	1	0	0	5	#N/A
ACBD3	3	0	3	2	#N/A
MIXL1	NA	0	0	0	#N/A
LIN9	NA	0	0	0	#N/A
PARP1	1	0	5	0	Other
STUM	NA	0	0	0	#N/A
PSEN2	1	0	0	1	#N/A
COQ8A	1	0	1	0	#N/A
CDC42BPA	NA	0	0	0	#N/A
SNAP47	NA	0	0	0	#N/A
JMJD4	NA	0	0	0	#N/A
WNT9A	NA	0	0	0	#N/A
WNT3A	NA	0	0	0	#N/A
ARF1	0	6	0	0	#N/A
C1orf35	1	0	3	0	#N/A
MRPL55	2	1	5	0	#N/A
GUK1	2	4	2	0	#N/A
GJC2	NA	0	0	0	#N/A
IBA57	NA	0	0	0	#N/A
OBSCN	NA	0	0	0	#N/A
RHOU	1	0	1	0	#N/A
RAB4A	1	0	5	0	#N/A
CCSAP	NA	0	0	0	#N/A
ACTA1	NA	0	0	0	#N/A
NUP133	NA	0	0	0	#N/A
ABCB10	NA	0	0	0	#N/A
TAF5L	NA	0	0	0	#N/A
URB2	NA	0	0	0	#N/A
GALNT2	1	0	2	0	#N/A
PGBD5	NA	0	0	0	#N/A
COG2	NA	0	0	0	#N/A
AGT	NA	0	0	0	#N/A
CAPN9	NA	0	0	0	#N/A
C1orf198	NA	0	0	0	#N/A
TTC13	1	0	0	1	#N/A
ARV1	NA	0	0	0	#N/A
FAM89A	1	0	1	0	#N/A
TRIM67	NA	0	0	0	#N/A
C1orf131	1	0	0	2	#N/A
GNPAT	NA	0	0	0	#N/A
EXOC8	NA	0	0	0	#N/A
SPRTN	NA	0	0	0	#N/A
EGLN1	2	1	1	4	#N/A
TSNAX	1	0	4	0	#N/A
DISC1	1	0	0	1	#N/A
SIPA1L2	2	1	4	0	#N/A
MAP10	NA	0	0	0	#N/A
NTPCR	1	0	1	0	#N/A
PCNX2	NA	0	0	0	#N/A
KCNK1	NA	0	0	0	#N/A
SLC35F3	NA	0	0	0	#N/A
COA6	1	0	4	0	#N/A
TARBP1	1	0	2	0	#N/A
IRF2BP2	2	5	1	0	#N/A
TOMM20	0	6	0	0	#N/A
RBM34	1	0	0	2	#N/A
ARID4B	0	6	0	0	#N/A
GGPS1	1	0	0	3	#N/A
TBCE	NA	0	0	0	#N/A
B3GALNT2	NA	0	0	0	#N/A
GNG4	NA	0	0	0	#N/A
LYST	2	1	3	2	Cellular Immunity
NID1	NA	0	0	0	#N/A
GPR137B	2	3	2	0	#N/A
ERO1B	2	1	1	0	#N/A
EDARADD	NA	0	0	0	#N/A
LGALS8	2	2	1	0	#N/A
HEATR1	NA	0	0	0	#N/A
ACTN2	NA	0	0	0	#N/A
MTR	NA	0	0	0	#N/A
RYR2	NA	0	0	0	#N/A
ZP4	NA	0	0	0	#N/A
CHRM3	NA	0	0	0	#N/A
FMN2	NA	0	0	0	#N/A
GREM2	NA	0	0	0	#N/A
RGS7	NA	0	0	0	#N/A
FH	1	0	1	0	#N/A
KMO	1	0	1	0	#N/A
OPN3	1	0	2	0	#N/A
WDR64	NA	0	0	0	#N/A
EXO1	NA	0	0	0	#N/A
MAP1LC3C	NA	0	0	0	#N/A
PLD5	NA	0	0	0	#N/A
CEP170	2	3	2	0	#N/A
SDCCAG8	1	0	4	0	#N/A
AKT3	NA	0	0	0	#N/A
ZBTB18	1	0	0	1	#N/A
C1orf100	NA	0	0	0	#N/A
DESI2	1	0	2	0	#N/A
COX20	1	0	6	0	#N/A
HNRNPU	0	6	0	0	#N/A
EFCAB2	NA	0	0	0	#N/A
KIF26B	NA	0	0	0	#N/A
SMYD3	NA	0	0	0	#N/A
TFB2M	NA	0	0	0	#N/A
CNST	1	0	0	1	#N/A
SCCPDH	1	0	1	0	#N/A
AHCTF1	1	0	3	0	#N/A
NLRP3	1	0	4	0	Phagocytosis
TRIM58	1	0	0	2	#N/A
SH3BP5L	NA	0	0	0	#N/A
ZNF692	NA	0	0	0	#N/A
FAM110C	NA	0	0	0	#N/A
SH3YL1	NA	0	0	0	#N/A
ACP1	2	1	5	0	#N/A
ALKAL2	NA	0	0	0	#N/A
TMEM18	1	0	2	0	#N/A
SNTG2	NA	0	0	0	#N/A
TPO	NA	0	0	0	#N/A
PXDN	NA	0	0	0	#N/A
MYT1L	NA	0	0	0	#N/A
EIPR1	NA	0	0	0	#N/A
TRAPPC12	NA	0	0	0	#N/A
ADI1	1	0	6	0	#N/A
RNASEH1	NA	0	0	0	#N/A
RPS7	2	5	1	0	#N/A
COLEC11	NA	0	0	0	#N/A
SOX11	NA	0	0	0	#N/A
CMPK2	1	0	0	1	#N/A
RSAD2	NA	0	0	0	#N/A
RNF144A	NA	0	0	0	#N/A
ID2	2	4	2	0	#N/A
KIDINS220	2	2	2	1	#N/A
MBOAT2	1	0	1	0	#N/A
ASAP2	1	0	0	2	#N/A
ITGB1BP1	2	1	4	0	#N/A
CPSF3	3	0	1	1	#N/A
IAH1	1	0	6	0	#N/A
ADAM17	2	1	3	1	Other
YWHAQ	0	6	0	0	#N/A
TAF1B	NA	0	0	0	#N/A
GRHL1	NA	0	0	0	#N/A
KLF11	1	0	2	0	#N/A
RRM2	NA	0	0	0	#N/A
HPCAL1	2	3	2	1	#N/A
ODC1	2	4	1	1	#N/A
NOL10	NA	0	0	0	#N/A
ATP6V1C2	NA	0	0	0	#N/A
PDIA6	2	5	1	0	#N/A
KCNF1	NA	0	0	0	#N/A
C2orf50	NA	0	0	0	#N/A
PQLC3	NA	0	0	0	#N/A
ROCK2	2	2	1	0	#N/A
E2F6	NA	0	0	0	#N/A
GREB1	NA	0	0	0	#N/A
LPIN1	1	0	1	0	#N/A
TRIB2	3	0	1	2	#N/A
FAM84A	NA	0	0	0	#N/A
NBAS	NA	0	0	0	#N/A
DDX1	3	0	2	4	#N/A
MYCN	NA	0	0	0	#N/A
FAM49A	2	4	2	0	#N/A
RAD51AP2	NA	0	0	0	#N/A
VSNL1	NA	0	0	0	#N/A
SMC6	1	0	1	0	#N/A
GEN1	NA	0	0	0	#N/A
MSGN1	NA	0	0	0	#N/A
KCNS3	NA	0	0	0	#N/A
RDH14	NA	0	0	0	#N/A
NT5C1B	1	0	0	2	#N/A
OSR1	NA	0	0	0	#N/A
LINC00954	NA	0	0	0	#N/A
TTC32	NA	0	0	0	#N/A
WDR35	NA	0	0	0	#N/A
MATN3	NA	0	0	0	#N/A
LAPTM4A	0	6	0	0	#N/A
SDC1	1	0	0	1	CD molecules
PUM2	2	4	1	0	#N/A
RHOB	2	5	1	0	#N/A
HS1BP3	NA	0	0	0	#N/A
GDF7	NA	0	0	0	#N/A
LDAH	1	0	0	1	#N/A
APOB	NA	0	0	0	#N/A
TDRD15	NA	0	0	0	#N/A
KLHL29	NA	0	0	0	#N/A
ATAD2B	2	1	1	2	#N/A
UBXN2A	3	0	1	1	#N/A
MFSD2B	NA	0	0	0	#N/A
WDCP	NA	0	0	0	#N/A
FKBP1B	1	0	1	0	#N/A
SF3B6	0	6	0	0	#N/A
FAM228B	NA	0	0	0	#N/A
TP53I3	1	0	1	0	#N/A
ITSN2	2	4	2	0	#N/A
NCOA1	2	2	1	3	#N/A
PTRHD1	1	0	6	0	#N/A
CENPO	NA	0	0	0	#N/A
ADCY3	1	0	1	0	#N/A
DNAJC27	NA	0	0	0	#N/A
EFR3B	NA	0	0	0	#N/A
POMC	NA	0	0	0	Other
DNMT3A	1	0	0	6	#N/A
DTNB	NA	0	0	0	#N/A
ASXL2	1	0	0	4	#N/A
KIF3C	NA	0	0	0	#N/A
RAB10	0	6	0	0	#N/A
GAREM2	NA	0	0	0	#N/A
HADHA	2	1	5	0	#N/A
HADHB	2	2	4	0	#N/A
SELENOI	NA	0	0	0	#N/A
DRC1	NA	0	0	0	#N/A
OTOF	NA	0	0	0	#N/A
C2orf70	NA	0	0	0	#N/A
KCNK3	NA	0	0	0	#N/A
SLC35F6	3	0	1	2	#N/A
CENPA	NA	0	0	0	#N/A
MAPRE3	NA	0	0	0	#N/A
TMEM214	1	0	0	2	#N/A
AGBL5	NA	0	0	0	#N/A
OST4	0	6	0	0	#N/A
EMILIN1	1	0	1	0	#N/A
KHK	NA	0	0	0	#N/A
CGREF1	NA	0	0	0	#N/A
ABHD1	NA	0	0	0	#N/A
PREB	NA	0	0	0	#N/A
SLC5A6	1	0	1	0	#N/A
ATRAID	2	4	2	0	#N/A
CAD	NA	0	0	0	#N/A
SLC30A3	NA	0	0	0	#N/A
DNAJC5G	NA	0	0	0	#N/A
TRIM54	NA	0	0	0	#N/A
UCN	NA	0	0	0	#N/A
MPV17	1	0	5	0	#N/A
GTF3C2	NA	0	0	0	#N/A
EIF2B4	1	0	0	4	#N/A
SNX17	1	0	6	0	#N/A
ZNF513	NA	0	0	0	#N/A
PPM1G	1	0	6	0	#N/A
NRBP1	1	0	4	0	#N/A
KRTCAP3	NA	0	0	0	#N/A
IFT172	NA	0	0	0	#N/A
FNDC4	NA	0	0	0	#N/A
ZNF512	NA	0	0	0	#N/A
GPN1	NA	0	0	0	#N/A
SUPT7L	NA	0	0	0	#N/A
SLC4A1AP	NA	0	0	0	#N/A
MRPL33	0	6	0	0	#N/A
RBKS	NA	0	0	0	#N/A
BABAM2	1	0	0	1	#N/A
FOSL2	2	3	2	1	#N/A
PLB1	NA	0	0	0	#N/A
PPP1CB	0	6	0	0	#N/A
SPDYA	NA	0	0	0	#N/A
TRMT61B	NA	0	0	0	#N/A
WDR43	1	0	2	0	#N/A
TOGARAM2	NA	0	0	0	#N/A
C2orf71	NA	0	0	0	#N/A
CLIP4	1	0	2	0	#N/A
ALK	NA	0	0	0	CD molecules
YPEL5	1	0	6	0	#N/A
LBH	NA	0	0	0	#N/A
LCLAT1	NA	0	0	0	#N/A
CAPN13	NA	0	0	0	#N/A
GALNT14	NA	0	0	0	#N/A
CAPN14	NA	0	0	0	#N/A
EHD3	1	0	0	5	#N/A
XDH	1	0	0	2	#N/A
SRD5A2	NA	0	0	0	#N/A
MEMO1	NA	0	0	0	#N/A
DPY30	3	0	3	1	#N/A
SPAST	NA	0	0	0	#N/A
SLC30A6	NA	0	0	0	#N/A
YIPF4	2	1	5	0	#N/A
BIRC6	0	6	0	0	#N/A
TTC27	NA	0	0	0	#N/A
LTBP1	1	0	1	0	#N/A
RASGRP3	0	1	0	0	#N/A
FAM98A	NA	0	0	0	#N/A
CRIM1	1	0	0	1	#N/A
FEZ2	2	1	5	0	#N/A
VIT	1	0	1	0	#N/A
STRN	1	0	0	1	#N/A
HEATR5B	1	0	1	0	#N/A
GPATCH11	3	0	2	1	#N/A
EIF2AK2	1	0	4	0	#N/A
SULT6B1	NA	0	0	0	#N/A
CEBPZ	2	2	4	0	#N/A
NDUFAF7	NA	0	0	0	#N/A
PRKD3	1	0	3	0	#N/A
QPCT	1	0	3	0	#N/A
CDC42EP3	1	0	5	0	#N/A
RMDN2	NA	0	0	0	#N/A
CYP1B1	1	0	2	0	#N/A
ATL2	2	1	5	0	#N/A
HNRNPLL	2	1	2	0	#N/A
GALM	NA	0	0	0	#N/A
SRSF7	2	1	5	0	#N/A
GEMIN6	NA	0	0	0	#N/A
DHX57	NA	0	0	0	#N/A
MORN2	NA	0	0	0	#N/A
ARHGEF33	NA	0	0	0	#N/A
SOS1	3	0	1	2	#N/A
MAP4K3	1	0	0	4	#N/A
THUMPD2	NA	0	0	0	#N/A
SLC8A1	2	2	2	0	#N/A
EML4	2	1	5	0	#N/A
COX7A2L	2	1	5	0	#N/A
KCNG3	NA	0	0	0	#N/A
MTA3	NA	0	0	0	#N/A
HAAO	NA	0	0	0	#N/A
ZFP36L2	2	4	2	0	#N/A
THADA	NA	0	0	0	#N/A
PLEKHH2	NA	0	0	0	#N/A
DYNC2LI1	NA	0	0	0	#N/A
ABCG5	NA	0	0	0	#N/A
ABCG8	NA	0	0	0	#N/A
LRPPRC	1	0	5	0	#N/A
PPM1B	2	3	3	0	#N/A
SLC3A1	NA	0	0	0	#N/A
PREPL	1	0	1	0	#N/A
CAMKMT	1	0	0	1	#N/A
SIX3	NA	0	0	0	#N/A
SIX2	NA	0	0	0	#N/A
SRBD1	NA	0	0	0	#N/A
PRKCE	1	0	1	0	#N/A
EPAS1	1	0	2	0	#N/A
RHOQ	2	3	1	1	#N/A
PIGF	NA	0	0	0	#N/A
CRIPT	3	0	1	1	#N/A
SOCS5	NA	0	0	0	Other
MCFD2	3	0	2	2	#N/A
TTC7A	2	1	1	0	#N/A
CALM2	0	6	0	0	#N/A
EPCAM	NA	0	0	0	#N/A
MSH2	NA	0	0	0	#N/A
KCNK12	1	0	0	1	#N/A
MSH6	NA	0	0	0	#N/A
FBXO11	2	2	3	0	#N/A
FOXN2	2	2	2	0	#N/A
PPP1R21	1	0	0	1	#N/A
STON1	NA	0	0	0	#N/A
GTF2A1L	NA	0	0	0	#N/A
LHCGR	NA	0	0	0	#N/A
FSHR	NA	0	0	0	#N/A
NRXN1	NA	0	0	0	#N/A
ASB3	NA	0	0	0	#N/A
CHAC2	NA	0	0	0	#N/A
ERLEC1	2	5	1	0	#N/A
GPR75	NA	0	0	0	#N/A
PSME4	2	2	2	0	#N/A
ACYP2	1	0	2	0	#N/A
SPTBN1	3	0	1	2	#N/A
EML6	NA	0	0	0	#N/A
RTN4	0	6	0	0	#N/A
RPS27A	2	5	1	0	#N/A
MTIF2	1	0	1	0	#N/A
CCDC88A	0	6	0	0	#N/A
CFAP36	NA	0	0	0	#N/A
PPP4R3B	2	5	1	0	#N/A
PNPT1	NA	0	0	0	#N/A
EFEMP1	NA	0	0	0	#N/A
CCDC85A	NA	0	0	0	#N/A
VRK2	3	0	2	1	#N/A
FANCL	NA	0	0	0	Other
BCL11A	2	2	1	0	#N/A
PAPOLG	NA	0	0	0	#N/A
REL	0	6	0	0	#N/A
PUS10	NA	0	0	0	#N/A
PEX13	NA	0	0	0	#N/A
KIAA1841	NA	0	0	0	#N/A
USP34	2	3	2	1	#N/A
XPO1	0	6	0	0	#N/A
FAM161A	NA	0	0	0	#N/A
CCT4	0	6	0	0	#N/A
COMMD1	2	4	1	1	#N/A
B3GNT2	3	0	1	3	#N/A
TMEM17	NA	0	0	0	#N/A
EHBP1	1	0	0	5	#N/A
OTX1	NA	0	0	0	#N/A
WDPCP	NA	0	0	0	#N/A
MDH1	0	6	0	0	#N/A
UGP2	2	1	5	0	#N/A
VPS54	1	0	0	1	#N/A
PELI1	2	2	2	0	#N/A
LGALSL	NA	0	0	0	#N/A
AFTPH	2	1	4	0	#N/A
SERTAD2	0	6	0	0	#N/A
SLC1A4	1	0	0	1	#N/A
CEP68	1	0	1	0	#N/A
RAB1A	0	6	0	0	#N/A
ACTR2	0	6	0	0	#N/A
SPRED2	1	0	0	1	#N/A
MEIS1	NA	0	0	0	#N/A
ETAA1	NA	0	0	0	#N/A
C1D	2	2	4	0	#N/A
PNO1	3	0	1	1	#N/A
PPP3R1	2	3	1	2	Other
CNRIP1	2	1	1	0	#N/A
PLEK	2	4	2	0	#N/A
FBXO48	NA	0	0	0	#N/A
APLF	NA	0	0	0	#N/A
PROKR1	NA	0	0	0	#N/A
ARHGAP25	2	1	1	0	#N/A
BMP10	NA	0	0	0	#N/A
GKN2	NA	0	0	0	#N/A
ANTXR1	NA	0	0	0	#N/A
GFPT1	2	1	1	1	#N/A
NFU1	3	0	2	2	#N/A
AAK1	2	1	2	1	#N/A
ANXA4	2	1	4	0	#N/A
GMCL1	1	0	1	0	#N/A
SNRNP27	2	4	1	0	#N/A
MXD1	2	4	1	0	#N/A
C2orf42	NA	0	0	0	#N/A
TIA1	2	2	3	0	#N/A
PCYOX1	1	0	1	0	#N/A
SNRPG	0	6	0	0	#N/A
FAM136A	3	0	4	1	#N/A
TGFA	NA	0	0	0	#N/A
ADD2	NA	0	0	0	#N/A
MCEE	NA	0	0	0	#N/A
MPHOSPH10	2	1	3	0	#N/A
PAIP2B	1	0	0	5	#N/A
ZNF638	1	0	6	0	#N/A
DYSF	1	0	2	0	#N/A
CYP26B1	NA	0	0	0	#N/A
EXOC6B	NA	0	0	0	#N/A
SPR	NA	0	0	0	#N/A
EMX1	NA	0	0	0	#N/A
SFXN5	NA	0	0	0	#N/A
RAB11FIP5	1	0	0	2	#N/A
NOTO	NA	0	0	0	#N/A
SMYD5	NA	0	0	0	#N/A
PRADC1	NA	0	0	0	#N/A
CCT7	2	3	3	0	#N/A
FBXO41	NA	0	0	0	#N/A
EGR4	NA	0	0	0	#N/A
ALMS1	NA	0	0	0	#N/A
NAT8	NA	0	0	0	#N/A
TPRKB	1	0	4	0	#N/A
DUSP11	1	0	0	1	#N/A
STAMBP	NA	0	0	0	#N/A
ACTG2	NA	0	0	0	#N/A
DGUOK	1	0	6	0	#N/A
TET3	3	0	1	4	#N/A
BOLA3	3	0	2	3	#N/A
MOB1A	1	0	6	0	#N/A
MTHFD2	3	0	4	1	#N/A
SLC4A5	NA	0	0	0	#N/A
DCTN1	1	0	4	0	#N/A
WDR54	NA	0	0	0	#N/A
RTKN	NA	0	0	0	#N/A
INO80B	NA	0	0	0	#N/A
WBP1	1	0	2	0	#N/A
MOGS	NA	0	0	0	#N/A
MRPL53	NA	0	0	0	#N/A
CCDC142	NA	0	0	0	#N/A
TTC31	NA	0	0	0	#N/A
LBX2	NA	0	0	0	#N/A
PCGF1	NA	0	0	0	#N/A
TLX2	NA	0	0	0	#N/A
DQX1	NA	0	0	0	#N/A
AUP1	2	2	4	0	#N/A
HTRA2	1	0	0	4	#N/A
LOXL3	NA	0	0	0	#N/A
DOK1	1	0	0	6	#N/A
M1AP	NA	0	0	0	#N/A
HK2	2	1	5	0	#N/A
POLE4	2	3	3	0	#N/A
TACR1	NA	0	0	0	#N/A
EVA1A	NA	0	0	0	#N/A
MRPL19	1	0	1	0	#N/A
GCFC2	NA	0	0	0	#N/A
LRRTM4	NA	0	0	0	#N/A
REG1A	NA	0	0	0	#N/A
CTNNA2	NA	0	0	0	#N/A
LRRTM1	NA	0	0	0	#N/A
SUCLG1	2	3	3	0	#N/A
TRABD2A	1	0	1	0	#N/A
KCMF1	1	0	4	0	#N/A
TCF7L1	1	0	1	0	#N/A
TGOLN2	0	6	0	0	#N/A
RETSAT	1	0	0	1	#N/A
ELMOD3	NA	0	0	0	#N/A
CAPG	2	1	3	0	#N/A
SH2D6	1	0	0	2	#N/A
MAT2A	1	0	6	0	#N/A
USP39	NA	0	0	0	#N/A
GNLY	1	0	0	5	Cellular Immunity
ATOH8	NA	0	0	0	#N/A
ST3GAL5	1	0	3	0	#N/A
POLR1A	NA	0	0	0	#N/A
PTCD3	NA	0	0	0	#N/A
IMMT	2	1	4	1	#N/A
MRPL35	1	0	0	4	#N/A
REEP1	NA	0	0	0	#N/A
KDM3A	1	0	0	1	#N/A
CHMP3	2	4	1	0	#N/A
RNF103	NA	0	0	0	#N/A
RMND5A	1	0	2	0	#N/A
CD8A	NA	0	0	0	CD molecules
RGPD1	NA	0	0	0	#N/A
SMYD1	NA	0	0	0	#N/A
FABP1	NA	0	0	0	#N/A
THNSL2	NA	0	0	0	#N/A
FOXI3	NA	0	0	0	#N/A
EIF2AK3	1	0	0	4	#N/A
RPIA	2	1	2	0	#N/A
TEKT4	NA	0	0	0	#N/A
MAL	NA	0	0	0	#N/A
MRPS5	1	0	6	0	#N/A
PROM2	NA	0	0	0	#N/A
KCNIP3	NA	0	0	0	#N/A
FAHD2A	1	0	0	4	#N/A
GPAT2	NA	0	0	0	#N/A
ADRA2B	NA	0	0	0	#N/A
ASTL	NA	0	0	0	#N/A
TMEM127	1	0	4	0	#N/A
CIAO1	1	0	4	0	#N/A
SNRNP200	2	2	4	0	#N/A
NCAPH	NA	0	0	0	#N/A
ARID5A	1	0	5	0	#N/A
KANSL3	NA	0	0	0	#N/A
FER1L5	NA	0	0	0	#N/A
LMAN2L	NA	0	0	0	#N/A
CNNM4	NA	0	0	0	#N/A
ANKRD39	1	0	0	3	#N/A
FAM178B	NA	0	0	0	#N/A
ZAP70	NA	0	0	0	Other
TMEM131	2	5	1	0	#N/A
VWA3B	NA	0	0	0	#N/A
CNGA3	NA	0	0	0	#N/A
INPP4A	2	1	2	2	#N/A
COA5	2	1	1	3	#N/A
UNC50	3	0	2	1	#N/A
MGAT4A	2	2	1	0	#N/A
TSGA10	NA	0	0	0	#N/A
LIPT1	NA	0	0	0	#N/A
MITD1	1	0	1	0	#N/A
MRPL30	1	0	0	2	#N/A
LYG2	NA	0	0	0	Cellular Immunity
TXNDC9	3	0	1	1	#N/A
EIF5B	0	6	0	0	#N/A
REV1	1	0	0	5	#N/A
AFF3	1	0	2	0	#N/A
LONRF2	1	0	0	2	#N/A
CHST10	1	0	0	1	#N/A
NMS	NA	0	0	0	#N/A
PDCL3	2	1	2	2	#N/A
NPAS2	NA	0	0	0	#N/A
RPL31	2	5	1	0	#N/A
TBC1D8	3	0	1	2	#N/A
CNOT11	1	0	0	1	#N/A
RNF149	1	0	5	0	#N/A
CREG2	NA	0	0	0	#N/A
RFX8	NA	0	0	0	#N/A
MAP4K4	2	3	3	0	#N/A
IL1R2	3	0	1	2	CD molecules
IL1R1	1	0	0	1	CD molecules
IL1RL2	NA	0	0	0	Chemokines and recptors
IL1RL1	NA	0	0	0	Chemokines and recptors
IL18R1	1	0	0	1	Chemokines and recptors
IL18RAP	NA	0	0	0	Chemokines and recptors
SLC9A4	NA	0	0	0	#N/A
SLC9A2	NA	0	0	0	#N/A
MFSD9	NA	0	0	0	#N/A
TMEM182	NA	0	0	0	#N/A
POU3F3	NA	0	0	0	#N/A
MRPS9	NA	0	0	0	#N/A
TGFBRAP1	1	0	0	1	#N/A
C2orf49	1	0	0	1	#N/A
FHL2	NA	0	0	0	#N/A
NCK2	1	0	0	3	#N/A
C2orf40	NA	0	0	0	#N/A
UXS1	1	0	1	0	#N/A
ST6GAL2	NA	0	0	0	#N/A
SLC5A7	NA	0	0	0	#N/A
SULT1C3	NA	0	0	0	#N/A
GCC2	2	3	3	0	#N/A
LIMS1	2	3	2	0	#N/A
CCDC138	NA	0	0	0	#N/A
EDAR	NA	0	0	0	#N/A
SH3RF3	NA	0	0	0	#N/A
SOWAHC	1	0	0	5	#N/A
MALL	NA	0	0	0	#N/A
NPHP1	NA	0	0	0	#N/A
BUB1	1	0	0	1	#N/A
BCL2L11	2	2	2	1	#N/A
ANAPC1	NA	0	0	0	#N/A
MERTK	1	0	0	3	#N/A
TMEM87B	1	0	0	6	#N/A
FBLN7	NA	0	0	0	#N/A
ZC3H8	NA	0	0	0	#N/A
ZC3H6	1	0	1	0	#N/A
TTL	1	0	0	1	#N/A
POLR1B	NA	0	0	0	#N/A
CHCHD5	1	0	6	0	#N/A
SLC20A1	1	0	5	0	#N/A
NT5DC4	NA	0	0	0	#N/A
CKAP2L	NA	0	0	0	#N/A
IL1B	0	3	0	0	Chemokines and recptors
RABL2A	NA	0	0	0	#N/A
SLC35F5	1	0	1	0	#N/A
ACTR3	0	6	0	0	#N/A
DPP10	NA	0	0	0	#N/A
DDX18	1	0	6	0	#N/A
CCDC93	1	0	0	2	#N/A
INSIG2	NA	0	0	0	#N/A
EN1	NA	0	0	0	#N/A
MARCO	2	1	2	0	Phagocytosis
C1QL2	NA	0	0	0	Complement system
STEAP3	NA	0	0	0	#N/A
C2orf76	NA	0	0	0	#N/A
DBI	0	6	0	0	#N/A
TMEM37	NA	0	0	0	#N/A
SCTR	NA	0	0	0	#N/A
CFAP221	NA	0	0	0	#N/A
TMEM177	NA	0	0	0	#N/A
PTPN4	1	0	0	2	#N/A
EPB41L5	NA	0	0	0	#N/A
TMEM185B	1	0	0	3	#N/A
RALB	2	2	2	0	#N/A
INHBB	NA	0	0	0	#N/A
GLI2	NA	0	0	0	#N/A
TFCP2L1	NA	0	0	0	#N/A
CLASP1	NA	0	0	0	#N/A
NIFK	2	1	3	0	#N/A
TSN	3	0	2	1	#N/A
CNTNAP5	NA	0	0	0	#N/A
GYPC	1	0	5	0	CD molecules
BIN1	2	3	2	0	#N/A
CYP27C1	NA	0	0	0	#N/A
[truncated: 15,914 more rows]
