# Supplementary material for: Cross-species comparison of single-cell landscapes reveals conservation and innovation in chicken immune systems
Source: Research Square preprint supplement (doi:10.21203/rs.3.rs-6164369/v1), 2025-03-20
Supplement: Supplementary file 6 [file ab774cddbe68488a045f54a1.xlsx]

## Sheet: Sheet1
Supplementary Table 8: Differentially expressed genes between chicken GC(II)_B and human GC(II)_B.
	p_val	avg_log2FC	pct.1	pct.2	p_val_adj	up-regulated or down-regulated in chicken
ABCC1	0	1.40678	0.584	0.18	0	up-regulated
DNAJA4	0	1.82789	0.556	0.077	0	up-regulated
DSTN	0	1.04234	0.861	0.452	0	up-regulated
EIF5A2	0	1.86823	0.581	0.066	0	up-regulated
ERO1B	0	1.3198	0.729	0.287	0	up-regulated
EVI2A	0	1.14274	0.653	0.289	0	up-regulated
HMGCR	0	1.3976	0.553	0.169	0	up-regulated
HMGCS1	0	1.14891	0.601	0.266	0	up-regulated
HMGN4	0	1.00257	0.694	0.364	0	up-regulated
HSPA2	0	3.0061	0.89	0.024	0	up-regulated
HVCN1	0	1.61892	0.795	0.203	0	up-regulated
IDI2	0	2.02333	0.47	0.003	0	up-regulated
IGLL1	0	2.93787	0.935	0.012	0	up-regulated
MATR3	0	2.36557	0.666	0.013	0	up-regulated
NYX	0	2.62244	0.753	0	0	up-regulated
PPP1R36	0	2.67107	0.725	0.005	0	up-regulated
RPS10	0	1.14884	0.948	0.453	0	up-regulated
RPS4Y1	0	1.19822	0.957	0.462	0	up-regulated
SLK	0	1.17781	0.52	0.216	0	up-regulated
TBL1X	0	1.73842	0.644	0.123	0	up-regulated
TCF12	0	1.34649	0.667	0.246	0	up-regulated
TMSB15B	0	2.55246	0.8	0.03	0	up-regulated
ARHGEF6	1.53160350210786e-322	1.35845	0.529	0.162	1.95616399289216e-318	up-regulated
GRK3	3.03603339369446e-320	1.53857	0.586	0.141	3.87762185042656e-316	up-regulated
DPYSL2	4.49693610188244e-319	1.50217	0.545	0.131	5.74348678932425e-315	up-regulated
RASSF2	1.05545761724128e-318	1.26269	0.623	0.225	1.34803046874056e-314	up-regulated
BOK	1.03222467431124e-317	1.96088	0.458	0.002	1.31835735403032e-313	up-regulated
HSPA4L	4.88832996586142e-317	1.93423	0.472	0.011	6.2433750323982e-313	up-regulated
DCBLD2	1.42399186866212e-311	1.83511	0.449	0.021	1.81872e-307	up-regulated
PAX5	1.89930725417233e-311	1.28661	0.749	0.27	2.4258e-307	up-regulated
GRAPL	0	1.87572	0.469	0.018	8.79867e-305	up-regulated
MANBA	0	1.40146	0.596	0.168	1.43187e-304	up-regulated
LEMD2	4.73368e-303	1.32353	0.505	0.16	6.04586e-299	up-regulated
MITF	4.42108e-300	1.90961	0.438	0.008	5.6466e-296	up-regulated
EHBP1	4.63207e-297	1.31281	0.458	0.134	5.91608e-293	up-regulated
PANK3	1.86622e-289	1.03977	0.497	0.227	2.38354e-285	up-regulated
ERCC6	1.56411e-288	1.60312	0.468	0.08	1.99768e-284	up-regulated
RBMXL1	1.01338e-286	1.33745	0.494	0.138	1.29429e-282	up-regulated
WDFY4	1.42689e-282	1.46379	0.587	0.148	1.82243e-278	up-regulated
ZFP92	3.08213e-273	1.79439	0.406	0.003	3.9365e-269	up-regulated
SLC4A7	4.9291e-272	1.09354	0.494	0.21	6.29545e-268	up-regulated
HIVEP2	2.09666e-265	1.17078	0.504	0.188	2.67786e-261	up-regulated
MBNL3	9.45879e-265	1.16697	0.482	0.176	1.20808e-260	up-regulated
DAPK1	9.04327e-262	1.78385	0.416	0.013	1.15501e-257	up-regulated
RBM24	2.44265e-259	1.77452	0.38	0	3.11975e-255	up-regulated
RNF130	1.88739e-255	1.51061	0.398	0.051	2.41058e-251	up-regulated
YPEL1	5.80094e-252	1.69938	0.426	0.035	7.40896e-248	up-regulated
DOK1	1.18046e-250	1.25264	0.499	0.158	1.50768e-246	up-regulated
NCF2	6.41562e-249	1.18191	0.451	0.144	8.19402e-245	up-regulated
CLIC2	2.64954e-248	1.70352	0.388	0.005	3.38399e-244	up-regulated
PGK2	3.18139e-244	1.69151	0.362	0	4.06327e-240	up-regulated
MAFK	2.434e-241	1.49326	0.388	0.057	3.10871e-237	up-regulated
TRIM66	1.39612e-239	1.47247	0.454	0.071	1.78312e-235	up-regulated
EHD3	7.93951e-238	1.10557	0.463	0.177	1.01403e-233	up-regulated
PASD1	1.69139e-232	1.67608	0.346	0	2.16024e-228	up-regulated
NR4A3	7.32131e-231	1.65882	0.402	0.032	9.35077e-227	up-regulated
ZNF704	2.88177e-229	1.68697	0.353	0.002	3.68059e-225	up-regulated
GNS	1.0028e-225	1.04011	0.418	0.163	1.28078e-221	up-regulated
PDGFB	4.53298e-221	1.66468	0.332	0.001	5.78953e-217	up-regulated
PLK3	8.19476e-221	1.06068	0.44	0.18	1.04664e-216	up-regulated
SEPTIN5	1.39786e-215	1.61706	0.331	0.002	1.78535e-211	up-regulated
ADGRA3	7.53452e-215	1.65561	0.348	0.005	9.6231e-211	up-regulated
DIAPH2	1.51743e-212	1.40179	0.404	0.076	1.93806e-208	up-regulated
ZC3H12A	1.26615e-211	1.27883	0.468	0.135	1.61713e-207	up-regulated
MAML1	4.35123e-210	1.13668	0.37	0.11	5.5574e-206	up-regulated
FAM53A	1.32775e-208	1.59619	0.333	0.008	1.6958e-204	up-regulated
CCNG2	2.81524e-205	1.0452	0.545	0.238	3.59563e-201	up-regulated
U2AF1	3.27946e-204	1.13224	0.379	0.113	4.18853e-200	up-regulated
ARHGAP17	8.56954e-204	1.48659	0.52	0.096	1.0945e-199	up-regulated
UACA	4.37688e-202	1.60871	0.318	0.012	5.59015e-198	up-regulated
RUBCNL	8.04187e-200	1.38618	0.506	0.116	1.02711e-195	up-regulated
NRK	7.11966e-197	1.54102	0.3	0	9.09322e-193	up-regulated
CRAMP1	4.55533e-195	1.2923	0.346	0.068	5.81806e-191	up-regulated
TNRC6C	3.16002e-189	1.31277	0.366	0.072	4.03598e-185	up-regulated
ZC3H12D	5.57618e-189	1.4286	0.439	0.076	7.12189e-185	up-regulated
LRP12	1.81042e-188	1.49912	0.298	0.002	2.31227e-184	up-regulated
SAMD11	2.2599e-187	1.51111	0.3	0.003	2.88634e-183	up-regulated
VAV3	5.6624e-187	1.4743	0.418	0.063	7.23202e-183	up-regulated
SUSD6	3.91081e-185	1.07023	0.45	0.173	4.99489e-181	up-regulated
BATF3	5.36264e-185	1.50057	0.306	0.011	6.84916e-181	up-regulated
TNFRSF21	1.65941e-184	1.47834	0.298	0.003	2.1194e-180	up-regulated
SIK1	4.25132e-183	1.16561	0.308	0.072	5.42979e-179	up-regulated
MDK	2.00097e-182	1.51715	0.312	0.02	2.55564e-178	up-regulated
ADCY7	5.81944e-182	1.0224	0.356	0.132	7.43259e-178	up-regulated
RFX7	8.52231e-180	1.02675	0.374	0.143	1.08847e-175	up-regulated
ZNRF1	3.82271e-177	1.15224	0.28	0.049	4.88237e-173	up-regulated
NUAK1	2.09034e-176	1.43464	0.272	0	2.66978e-172	up-regulated
NMT2	2.42709e-176	1.08332	0.325	0.093	3.09988e-172	up-regulated
CHST13	5.77749e-175	1.40257	0.27	0	7.379e-171	up-regulated
LONRF3	1.62744e-174	1.48325	0.28	0.002	2.07856e-170	up-regulated
USP25	4.88234e-174	1.03437	0.322	0.106	6.23573e-170	up-regulated
GNAI1	6.89385e-173	1.425	0.272	0.001	8.80482e-169	up-regulated
PPFIBP1	1.00816e-168	1.29458	0.288	0.035	1.28762e-164	up-regulated
TPM1	1.79525e-168	1.17703	0.321	0.068	2.29289e-164	up-regulated
SLC43A2	1.33336e-164	1.05124	0.348	0.114	1.70297e-160	up-regulated
IL18	5.18685e-162	1.44515	0.274	0.012	6.62465e-158	up-regulated
FGD3	4.20086e-161	1.05517	0.366	0.123	5.36534e-157	up-regulated
MGARP	8.25072e-159	1.3643	0.274	0.005	1.05378e-154	up-regulated
RNF19B	2.62313e-156	1.11135	0.304	0.071	3.35026e-152	up-regulated
ERN2	1.57008e-155	1.32486	0.251	0.001	2.00531e-151	up-regulated
ALDOC	5.69474e-152	1.27564	0.328	0.045	7.27332e-148	up-regulated
KSR1	3.54567e-150	1.07777	0.259	0.055	4.52853e-146	up-regulated
GPR171	1.27596e-146	1.30894	0.255	0.008	1.62965e-142	up-regulated
SYNGR3	1.59077e-146	1.29294	0.264	0.012	2.03173e-142	up-regulated
RASAL1	5.87872e-145	1.31612	0.284	0.017	7.5083e-141	up-regulated
LAMP3	1.18945e-142	1.15766	0.252	0.032	1.51917e-138	up-regulated
PPARD	4.19867e-142	1.08552	0.288	0.067	5.36254e-138	up-regulated
HIVEP3	2.66746e-140	1.32332	0.352	0.05	3.40688e-136	up-regulated
WBP2NL	1.67581e-138	1.13786	0.252	0.032	2.14034e-134	up-regulated
GRK4	8.01671e-137	1.15645	0.254	0.036	1.02389e-132	up-regulated
FYN	1.82876e-131	1.0503	0.348	0.108	2.33569e-127	up-regulated
SLC45A3	2.23171e-131	1.24932	0.252	0.01	2.85034e-127	up-regulated
AFF2	1.19312e-130	1.30203	0.321	0.037	1.52385e-126	up-regulated
TEC	9.71871e-130	1.14381	0.291	0.056	1.24127e-125	up-regulated
EEPD1	2.18416e-116	1.18235	0.27	0.035	2.78961e-112	up-regulated
SPSB1	1.41328e-114	1.04079	0.289	0.073	1.80505e-110	up-regulated
ZNF516	7.51287e-113	1.22003	0.258	0.022	9.59544e-109	up-regulated
GPR174	2.62964e-111	1.01426	0.256	0.058	3.35858e-107	up-regulated
TRAF5	6.4614e-109	1.03881	0.414	0.14	8.2525e-105	up-regulated
BCL6	4.01017e-107	1.0353	0.467	0.155	5.12179e-103	up-regulated
EBF1	9.19918e-97	1.00619	0.449	0.154	1.17492e-92	up-regulated
ACTG1	0	-2.1259	0.161	0.987	0	down-regulated
COMMD6	0	-2.46901	0.04	0.824	0	down-regulated
CYBA	0	-1.42224	0.293	0.868	0	down-regulated
FTL	0	-2.73365	0.019	0.886	0	down-regulated
GYPC	0	-2.45579	0.002	0.652	0	down-regulated
HINT1	0	-2.61009	0.016	0.802	0	down-regulated
HMGA1	0	-2.12188	0.074	0.733	0	down-regulated
LIMD2	0	-1.20846	0.364	0.892	0	down-regulated
MYL6	0	-1.64189	0.23	0.879	0	down-regulated
NACA	0	-1.07391	0.454	0.939	0	down-regulated
NOP53	0	-2.59962	0	0.724	0	down-regulated
PCBP2	0	-1.90419	0.109	0.721	0	down-regulated
PFDN5	0	-1.29396	0.317	0.856	0	down-regulated
PPDPF	0	-2.44316	0.006	0.665	0	down-regulated
RGS13	0	-2.63605	0.01	0.778	0	down-regulated
SNRPD2	0	-2.0466	0.076	0.716	0	down-regulated
SNX3	0	-2.23037	0.056	0.743	0	down-regulated
SYPL1	0	-2.41964	0.002	0.637	0	down-regulated
ELOB	6.07700744384733e-322	-1.87039	0.098	0.678	7.76155390728181e-318	down-regulated
UQCRB	0	-1.36	0.286	0.848	1.93464e-304	down-regulated
ALOX5AP	5.13943e-306	-2.19868	0.026	0.617	6.56408e-302	down-regulated
BRK1	5.32963e-298	-1.66849	0.142	0.69	6.807e-294	down-regulated
GCHFR	3.31908e-292	-2.27526	0	0.559	4.23912e-288	down-regulated
TCEA1	1.41869e-288	-1.52035	0.193	0.734	1.81194e-284	down-regulated
HERPUD1	1.53564e-288	-1.56989	0.188	0.756	1.96132e-284	down-regulated
ARPC5	1.68169e-286	-1.51471	0.182	0.702	2.14785e-282	down-regulated
ATP5PO	4.72392e-283	-2.23467	0	0.545	6.03339e-279	down-regulated
SRP14	8.45873e-283	-1.36141	0.272	0.829	1.08035e-278	down-regulated
SELENOT	1.874e-278	-1.86424	0.083	0.637	2.39347e-274	down-regulated
LY86	3.63991e-273	-2.21801	0.002	0.54	4.6489e-269	down-regulated
ATP5PF	8.95129e-271	-2.18406	0	0.525	1.14326e-266	down-regulated
SEL1L3	1.73531e-258	-1.89662	0.078	0.645	2.21634e-254	down-regulated
P2RX5	2.80532e-257	-2.09406	0.025	0.572	3.58295e-253	down-regulated
GGA2	1.99356e-255	-2.05712	0.029	0.567	2.54618e-251	down-regulated
VPREB3	1.80641e-247	-1.10256	0.381	0.869	2.30715e-243	down-regulated
LCK	8.57114e-242	-2.09134	0.002	0.486	1.09471e-237	down-regulated
SYNGR2	1.33912e-235	-1.60583	0.106	0.567	1.71032e-231	down-regulated
VASP	1.93453e-233	-1.99416	0.016	0.489	2.47079e-229	down-regulated
RGS10	8.00578e-233	-2.04411	0.016	0.519	1.0225e-228	down-regulated
CD40	7.07103e-230	-1.62565	0.112	0.597	9.03112e-226	down-regulated
SELENOH	4.52819e-229	-1.42304	0.18	0.656	5.7834e-225	down-regulated
ERP29	2.17124e-226	-1.83873	0.062	0.569	2.7731e-222	down-regulated
UBL5	1.82043e-223	-1.12953	0.254	0.642	2.32506e-219	down-regulated
HSP90AB1	2.60732e-221	-1.40755	0.203	0.708	3.33006e-217	down-regulated
LSM10	1.13251e-220	-1.95144	0.024	0.506	1.44645e-216	down-regulated
TMEM243	4.71954e-219	-1.44786	0.156	0.613	6.0278e-215	down-regulated
SMDT1	1.13495e-209	-1.52136	0.14	0.617	1.44956e-205	down-regulated
GRHPR	4.80651e-209	-1.94057	0.01	0.454	6.13888e-205	down-regulated
MZT2B	8.1338e-202	-1.84205	0.043	0.515	1.03885e-197	down-regulated
DAZAP2	6.00076e-201	-1.77891	0.038	0.468	7.66416e-197	down-regulated
SMARCB1	4.60662e-200	-1.53534	0.114	0.56	5.88357e-196	down-regulated
IRF8	5.48028e-199	-1.16387	0.258	0.681	6.99941e-195	down-regulated
SYNE2	1.09302e-196	-1.936	0.016	0.47	1.396e-192	down-regulated
MBD4	1.67924e-194	-1.48532	0.132	0.581	2.14472e-190	down-regulated
VAMP2	5.79012e-194	-1.90697	0.013	0.451	7.39514e-190	down-regulated
DAAM1	1.24972e-192	-1.91152	0.006	0.423	1.59614e-188	down-regulated
RHOG	1.7526e-190	-1.86602	0.016	0.442	2.23842e-186	down-regulated
LYPLA1	2.52242e-189	-1.64794	0.076	0.52	3.22164e-185	down-regulated
SORL1	7.02004e-189	-1.87494	0.004	0.406	8.966e-185	down-regulated
LMO2	5.50709e-188	-1.6459	0.074	0.512	7.03366e-184	down-regulated
LSM7	5.87633e-185	-1.54189	0.102	0.54	7.50524e-181	down-regulated
MOB1A	9.14607e-184	-1.56091	0.089	0.514	1.16814e-179	down-regulated
SRSF5	1.68791e-183	-1.30956	0.184	0.611	2.1558e-179	down-regulated
PSME1	1.33157e-182	-1.38158	0.128	0.518	1.70069e-178	down-regulated
SNAP23	1.87003e-181	-1.70724	0.048	0.47	2.3884e-177	down-regulated
NEDD8	6.6636e-181	-1.22446	0.176	0.543	8.51075e-177	down-regulated
CSTB	2.12625e-179	-1.57403	0.085	0.511	2.71565e-175	down-regulated
FERMT3	1.18099e-175	-1.7731	0	0.362	1.50836e-171	down-regulated
DBNL	2.83066e-173	-1.4189	0.098	0.466	3.61532e-169	down-regulated
ARPC5L	5.07174e-173	-1.65523	0.051	0.455	6.47762e-169	down-regulated
S1PR2	2.66965e-172	-1.80352	0.002	0.368	3.40968e-168	down-regulated
CD180	3.88224e-172	-1.76174	0	0.355	4.95839e-168	down-regulated
RBM8A	7.32379e-172	-1.6965	0.042	0.453	9.35395e-168	down-regulated
ABRACL	6.44311e-170	-1.28193	0.17	0.565	8.22914e-166	down-regulated
SNX5	1.84301e-165	-1.73327	0.031	0.437	2.3539e-161	down-regulated
RGS19	1.27339e-164	-1.72047	0.01	0.37	1.62637e-160	down-regulated
DEF8	8.25834e-164	-1.73317	0.005	0.361	1.05476e-159	down-regulated
CDK2AP2	1.97891e-160	-1.69322	0.012	0.37	2.52746e-156	down-regulated
ATP5MC1	1.27874e-159	-1.67836	0	0.332	1.6332e-155	down-regulated
FAM3C	1.2881e-159	-1.70492	0.016	0.379	1.64516e-155	down-regulated
STK17A	1.55868e-159	-1.30186	0.17	0.584	1.99074e-155	down-regulated
TBCA	1.36022e-157	-1.10927	0.228	0.599	1.73727e-153	down-regulated
STK17B	3.62344e-157	-1.25864	0.201	0.628	4.62785e-153	down-regulated
METAP2	3.80857e-157	-1.27237	0.175	0.575	4.86431e-153	down-regulated
RBM6	1.41159e-156	-1.5181	0.089	0.495	1.80288e-152	down-regulated
DCK	2.85006e-154	-1.63761	0.037	0.414	3.6401e-150	down-regulated
SPCS2	2.64579e-151	-1.28959	0.156	0.545	3.3792e-147	down-regulated
LPP	1.98399e-150	-1.24097	0.184	0.58	2.53395e-146	down-regulated
LSM8	1.33339e-149	-1.26142	0.146	0.506	1.703e-145	down-regulated
CTSH	5.13032e-149	-1.22442	0.196	0.603	6.55244e-145	down-regulated
TMC6	9.46749e-149	-1.66275	0.02	0.38	1.20919e-144	down-regulated
DHRS9	5.37165e-148	-1.62755	0	0.31	6.86067e-144	down-regulated
LAMTOR1	5.84387e-146	-1.56418	0.03	0.371	7.46379e-142	down-regulated
CYBC1	8.89252e-145	-1.5106	0.059	0.423	1.13575e-140	down-regulated
SPATS2	1.81593e-144	-1.47335	0.059	0.401	2.3193e-140	down-regulated
TAGLN2	2.94281e-144	-1.55173	0.025	0.353	3.75855e-140	down-regulated
LAMTOR5	4.29174e-142	-1.02706	0.218	0.537	5.48141e-138	down-regulated
S100A10	4.94594e-142	-1.30592	0.078	0.377	6.31695e-138	down-regulated
PLEKHF2	7.74733e-140	-1.42228	0.084	0.442	9.89489e-136	down-regulated
CCDC69	4.50497e-139	-1.41799	0.078	0.431	5.75374e-135	down-regulated
GSTK1	2.07637e-138	-1.57356	0.048	0.424	2.65194e-134	down-regulated
CAMK1	7.20166e-138	-1.62716	0.008	0.327	9.19796e-134	down-regulated
EVI2B	1.66371e-137	-1.03795	0.198	0.503	2.12489e-133	down-regulated
SEC62	1.62542e-136	-1.05825	0.258	0.637	2.07598e-132	down-regulated
MX1	4.57101e-136	-1.58576	0.009	0.319	5.8381e-132	down-regulated
ZBTB20	7.37504e-136	-1.59071	0.046	0.42	9.41941e-132	down-regulated
TERF2IP	1.31564e-135	-1.04669	0.206	0.529	1.68033e-131	down-regulated
NCOA3	7.00922e-135	-1.43456	0.087	0.459	8.95217e-131	down-regulated
MAP4K1	1.47095e-134	-1.52751	0	0.284	1.8787e-130	down-regulated
RAB11FIP1	7.87841e-134	-1.54696	0.006	0.302	1.00623e-129	down-regulated
MAP4K4	7.10072e-133	-1.57043	0.016	0.333	9.06904e-129	down-regulated
ADAM28	6.68811e-132	-1.51846	0	0.279	8.54206e-128	down-regulated
CMTM6	6.75967e-132	-1.55188	0.032	0.374	8.63345e-128	down-regulated
HTR3A	4.69783e-131	-1.55239	0.001	0.288	6.00006e-127	down-regulated
CXXC5	5.50742e-131	-1.54185	0.002	0.293	7.03408e-127	down-regulated
LYPLAL1	7.60027e-131	-1.52241	0.026	0.344	9.70706e-127	down-regulated
APRT	1.46598e-130	-1.32583	0.097	0.436	1.87235e-126	down-regulated
SERPINB1	1.97211e-129	-1.53912	0.006	0.301	2.51878e-125	down-regulated
TUT4	2.97363e-129	-1.49873	0	0.274	3.79792e-125	down-regulated
SH2B2	1.36073e-128	-1.48247	0	0.272	1.73793e-124	down-regulated
RTRAF	5.16735e-128	-1.08438	0.192	0.52	6.59974e-124	down-regulated
LSM6	6.53628e-128	-1.46301	0.062	0.412	8.34814e-124	down-regulated
GLRX	7.15783e-128	-1.51267	0.002	0.287	9.14198e-124	down-regulated
ARHGAP30	2.83757e-127	-1.4747	0	0.27	3.62414e-123	down-regulated
TAF7	4.55551e-127	-1.3482	0.082	0.412	5.8183e-123	down-regulated
COX7A2L	5.12661e-127	-1.15684	0.154	0.479	6.54771e-123	down-regulated
SELENOF	6.41147e-127	-1.03282	0.182	0.476	8.18873e-123	down-regulated
PEBP1	1.72873e-126	-1.51243	0.021	0.336	2.20793e-122	down-regulated
BACH2	2.67437e-125	-1.47456	0	0.266	3.41571e-121	down-regulated
GPX4	4.21445e-125	-1.1885	0.12	0.428	5.38269e-121	down-regulated
OGG1	6.7288e-124	-1.47969	0.045	0.38	8.59402e-120	down-regulated
RALY	7.4564e-123	-1.51974	0.005	0.297	9.52332e-119	down-regulated
UFC1	1.05362e-122	-1.47373	0.009	0.292	1.34568e-118	down-regulated
SRGN	1.12533e-122	-1.44957	0	0.261	1.43727e-118	down-regulated
MTMR14	3.0334e-122	-1.47964	0.027	0.333	3.87426e-118	down-regulated
SHKBP1	1.56897e-120	-1.45628	0.002	0.271	2.00389e-116	down-regulated
ARL6IP4	4.91077e-120	-1.08447	0.192	0.527	6.27204e-116	down-regulated
APEX1	1.06292e-119	-1.44769	0	0.262	1.35756e-115	down-regulated
SRP9	6.24787e-119	-1.10133	0.176	0.502	7.97977e-115	down-regulated
VDAC1	8.11118e-119	-1.46252	0.04	0.362	1.03596e-114	down-regulated
TNFAIP8	1.42081e-118	-1.28001	0.12	0.471	1.81466e-114	down-regulated
CYTIP	1.75479e-118	-1.31	0.087	0.409	2.24122e-114	down-regulated
LPXN	2.60019e-117	-1.04596	0.148	0.423	3.32096e-113	down-regulated
RNASET2	5.41046e-117	-1.46889	0.045	0.375	6.91024e-113	down-regulated
LYSMD2	1.48633e-115	-1.11526	0.148	0.451	1.89835e-111	down-regulated
SSNA1	1.08397e-114	-1.46034	0.009	0.289	1.38444e-110	down-regulated
STAP1	8.22246e-114	-1.44426	0.005	0.274	1.05017e-109	down-regulated
DNMT1	7.05882e-113	-1.30209	0.059	0.344	9.01552e-109	down-regulated
GABARAPL2	1.0052e-111	-1.1287	0.161	0.488	1.28385e-107	down-regulated
KTN1	1.10287e-111	-1.24867	0.15	0.529	1.40858e-107	down-regulated
N4BP2L2	5.28183e-110	-1.34958	0.066	0.377	6.74595e-106	down-regulated
ERGIC3	2.97723e-109	-1.44388	0.027	0.326	3.80252e-105	down-regulated
SNX22	3.58285e-108	-1.40151	0.004	0.256	4.57602e-104	down-regulated
CLTA	4.45132e-108	-1.24008	0.119	0.457	5.68523e-104	down-regulated
SF3B5	6.9602e-107	-1.03721	0.127	0.38	8.88956e-103	down-regulated
TADA3	2.21792e-106	-1.36748	0.022	0.288	2.83273e-102	down-regulated
DRAM2	2.43724e-106	-1.34371	0.058	0.358	3.11284e-102	down-regulated
GTF2I	2.0618e-105	-1.34265	0.044	0.328	2.63334e-101	down-regulated
GUK1	1.44287e-104	-1.15285	0.134	0.449	1.84284e-100	down-regulated
PHACTR1	2.32663e-104	-1.42228	0.007	0.266	2.97157e-100	down-regulated
NR3C1	3.95794e-104	-1.22254	0.115	0.437	5.05508e-100	down-regulated
GMDS	5.78704e-104	-1.25761	0.105	0.423	7.39121e-100	down-regulated
FKBP8	7.35438e-104	-1.28737	0.048	0.319	9.39301e-100	down-regulated
PXK	1.58294e-103	-1.36238	0.052	0.354	2.02173e-99	down-regulated
PTPN7	1.16998e-101	-1.1651	0.096	0.371	1.4943e-97	down-regulated
CMPK1	4.93795e-101	-1.29431	0.052	0.332	6.30676e-97	down-regulated
NIN	4.15114e-100	-1.40167	0.029	0.318	5.30184e-96	down-regulated
ZNF106	7.72402e-98	-1.34424	0.048	0.341	9.86512e-94	down-regulated
PTRHD1	1.57879e-97	-1.33924	0.028	0.293	2.01642e-93	down-regulated
CCDC88A	4.25222e-96	-1.30128	0.108	0.464	5.43094e-92	down-regulated
BLK	7.95995e-95	-1.16776	0.094	0.372	1.01664e-90	down-regulated
BLOC1S1	1.11821e-94	-1.03506	0.115	0.362	1.42818e-90	down-regulated
STAT6	4.82058e-94	-1.3216	0.013	0.257	6.15685e-90	down-regulated
MCUB	1.07521e-93	-1.31977	0.03	0.293	1.37326e-89	down-regulated
SUSD3	1.74017e-93	-1.26437	0.053	0.319	2.22255e-89	down-regulated
BRI3BP	9.1605e-90	-1.27171	0.02	0.253	1.16998e-85	down-regulated
NHP2	1.56337e-89	-1.08432	0.09	0.335	1.99674e-85	down-regulated
TRABD	1.25015e-88	-1.15979	0.089	0.362	1.59669e-84	down-regulated
TSPAN13	1.44287e-88	-1.28362	0.016	0.252	1.84283e-84	down-regulated
OFD1	1.27772e-87	-1.27622	0.027	0.27	1.63191e-83	down-regulated
ECH1	6.61231e-87	-1.18882	0.035	0.265	8.44524e-83	down-regulated
LYRM4	2.01771e-86	-1.25535	0.045	0.304	2.57702e-82	down-regulated
RNPS1	1.09412e-85	-1.00094	0.113	0.348	1.39741e-81	down-regulated
ARF5	4.62075e-85	-1.21327	0.044	0.293	5.90162e-81	down-regulated
PLEKHJ1	8.3369e-85	-1.13551	0.063	0.301	1.06479e-80	down-regulated
CPNE3	4.12269e-84	-1.13864	0.092	0.358	5.2655e-80	down-regulated
TCF25	5.91463e-84	-1.08502	0.129	0.414	7.55417e-80	down-regulated
SNX17	5.05017e-83	-1.07969	0.066	0.289	6.45008e-79	down-regulated
NSMCE1	6.00834e-82	-1.24075	0.028	0.267	7.67385e-78	down-regulated
ATM	1.96291e-80	-1.23724	0.063	0.34	2.50703e-76	down-regulated
TMED8	4.15941e-80	-1.12076	0.074	0.319	5.3124e-76	down-regulated
HNRNPUL1	5.83354e-80	-1.16133	0.032	0.25	7.4506e-76	down-regulated
IDH2	6.12153e-80	-1.02259	0.086	0.306	7.81841e-76	down-regulated
LSM4	4.95108e-78	-1.0187	0.067	0.271	6.32351e-74	down-regulated
DPP7	9.71766e-78	-1.19102	0.028	0.25	1.24114e-73	down-regulated
POLR2K	2.43997e-77	-1.12841	0.081	0.337	3.11633e-73	down-regulated
RGS2	6.41654e-77	-1.22319	0.024	0.25	8.1952e-73	down-regulated
FGD6	6.89849e-77	-1.23596	0.028	0.263	8.81075e-73	down-regulated
MPLKIP	3.45222e-76	-1.12247	0.043	0.261	4.40918e-72	down-regulated
QRSL1	8.0737e-76	-1.16637	0.044	0.274	1.03117e-71	down-regulated
MYO1E	1.3746e-75	-1.22282	0.029	0.265	1.75564e-71	down-regulated
GGNBP2	3.54131e-75	-1.01842	0.145	0.42	4.52296e-71	down-regulated
OTUB1	2.16364e-74	-1.0118	0.064	0.266	2.7634e-70	down-regulated
ISCU	2.33071e-74	-1.05869	0.05	0.253	2.97678e-70	down-regulated
ITM2B	2.84978e-74	-1.13692	0.04	0.261	3.63974e-70	down-regulated
PHF6	3.034e-74	-1.042	0.097	0.333	3.87503e-70	down-regulated
XRCC6	5.51208e-74	-1.09457	0.07	0.305	7.04002e-70	down-regulated
TMEM156	6.6643e-74	-1.10459	0.074	0.314	8.51164e-70	down-regulated
GADD45GIP1	3.04836e-73	-1.08029	0.082	0.322	3.89336e-69	down-regulated
MRPL41	3.75249e-72	-1.10939	0.059	0.289	4.79268e-68	down-regulated
STRBP	1.3269e-69	-1.10024	0.072	0.311	1.69471e-65	down-regulated
BLOC1S6	1.59638e-69	-1.03588	0.057	0.261	2.0389e-65	down-regulated
C7orf50	2.02176e-69	-1.09685	0.043	0.25	2.58219e-65	down-regulated
ZBTB8OS	5.02536e-69	-1.02892	0.07	0.281	6.41839e-65	down-regulated
TMEM59	8.59933e-67	-1.03041	0.056	0.259	1.09831e-62	down-regulated
AKR1A1	9.89264e-66	-1.06714	0.068	0.294	1.26349e-61	down-regulated
MPG	2.45651e-64	-1.01538	0.066	0.275	3.13745e-60	down-regulated
MTERF4	2.48229e-64	-1.03194	0.054	0.256	3.17039e-60	down-regulated
TANK	1.55482e-63	-1.06032	0.05	0.258	1.98582e-59	down-regulated
P2RY8	2.11624e-61	-1.11195	0.046	0.271	2.70286e-57	down-regulated
PPM1K	2.89453e-60	-1.09288	0.044	0.258	3.69689e-56	down-regulated
ID3	5.92866e-59	-1.00066	0.066	0.267	7.57209e-55	down-regulated
