# Supplementary material for: Cross-species comparison of single-cell landscapes reveals conservation and innovation in chicken immune systems
Source: Research Square preprint supplement (doi:10.21203/rs.3.rs-6164369/v1), 2025-03-20
Supplement: Supplementary file 7 [file cdfe3d8631e070dbfe69ef61.xlsx]

## Sheet: Sheet1
Supplementary Table 9: Genes differentially expressed along the trajectories from double negative T cells to γδ T_2.
	waldStat	pvalue	meanLogFC
FRMD8	1876.97	0	0.345794
TRA2A	211.081	0	0.420743
CUL4B	16.6999	0.00510561	0.226343
HBP1	78.7215	1.55E-15	0.262952
PDZRN4	18.744	0.00214491	0.636172
TSC22D1	608.174	0	1.21757
NCOA2	52.3265	4.62E-10	0.180547
LOC107054254	233.803	0	1.20114
B3GLCT	71.999	3.93E-14	0.862048
FARP1	98.682	0	0.659306
PPP3CA	348.3	0	1.63848
ELF2	26.0601	8.69E-05	0.635712
FNIP1	55.9136	8.47E-11	0.519639
THRAP3	56.0674	7.87E-11	0.332332
FRMD4A	27.1294	5.38E-05	0.368174
DIAPH2	111.428	0	0.188231
FXR1	127.721	0	0.290457
MSH3	37.7788	4.18E-07	0.362304
CDK13	87.6263	0	0.326132
SLC38A2	837.389	0	1.13592
RBMXL1	100.893	0	0.570035
DMXL1	110.299	0	0.322971
LOC423499	49.9243	1.44E-09	0.736282
SLC25A12	16.1465	0.00643812	0.167737
DOCK1	43.2231	3.33E-08	0.499631
TIAL1	148.97	0	0.445533
GPHN	83.2324	2.22E-16	0.497969
THBD	21.7694	0.000579177	2.7724
HNRNPH3	38.5526	2.92E-07	0.296686
ADGRA1	48.755	2.49E-09	0.565379
RNF220	254.786	0	0.541117
TRPC4AP	119.958	0	0.406564
LOC422426	40.9524	9.59E-08	0.222662
APH1AL	16.4915	0.00557232	0.271152
SPSB1	68.6906	1.92E-13	0.347988
ZCCHC6	118.402	0	0.455195
SYNE1	2332.19	0	1.06211
SOGA1	22.8949	0.000353542	1.5414
HNRNPDL	368.968	0	0.221808
FBXO39	31.3012	8.17E-06	0.407684
PLD5	569.286	0	1.69989
ATP2B2	756.23	0	1.74577
KCNQ1	998.976	0	1.41573
LOC112532302	41.0671	9.09E-08	0.394489
SLC24A3	170.067	0	1.10943
SGTA	23.7903	0.000238209	0.366311
RPS23	252.566	0	0.162727
PPP2R2D	88.2192	0	0.721606
JADE1	16.5398	0.00546054	0.367261
TESK2	58.0212	3.11E-11	0.584348
ITPR1	192.824	0	0.236842
MAN1A1	110.8	0	0.317231
MICAL2	31.7604	6.63E-06	0.874151
VPS37B	796.23	0	0.718002
ATAD2B	53.2395	3.00E-10	0.343521
SAT1	2730.29	0	0.550691
ATL2	175.83	0	0.983122
COL3A1	139.34	0	1.20304
MRPS2	47.193	5.19E-09	0.39802
MTR	60.8103	8.27E-12	0.244982
LOC107052861	35.1539	1.40E-06	0.720272
OTUD7A	243.564	0	1.71209
MYH9	1492.48	0	0.618724
RASA2	738.11	0	0.626021
EYS	64.1655	1.67E-12	0.954021
PDK4	251.201	0	2.23497
CADM2	48.0004	3.55E-09	0.36913
METTL14	516.569	0	1.62199
LPCAT2	87.4394	0	1.27762
NA	NA	NA	NA
CWC27	120.298	0	0.608384
G0S2	35.5222	1.18E-06	0.719567
TMSB15B	182.368	0	0.855756
DAPK1	152.358	0	0.391636
CANX	116.655	0	0.600571
OAZ1	293.546	0	0.176832
DPYD	333.353	0	1.28272
C12orf57	64.1015	1.72E-12	0.151181
FAM114A2	19.401	0.001618	0.377925
LSAMP	49.5887	1.68E-09	0.475661
MGMT	311.597	0	0.863126
PARD3B	24.5688	0.000168746	0.688209
GNMT	826.998	0	2.61951
ASIC2	18.8965	0.00200935	0.428409
SLC11A2	26.0783	8.62E-05	0.442019
PTPRM	25.3669	0.000118346	0.660411
MANF	190.16	0	1.08927
PRMT1	32.3235	5.13E-06	1.80979
CASK	69.1975	1.51E-13	0.60293
NDST4	158.011	0	0.528363
C4BPM	17.5885	0.00350884	0.292636
EML4	159.963	0	0.434098
ARPC1B	1264.73	0	0.810643
GNAI1	924.301	0	0.761714
SLC25A3	707.781	0	0.390397
QKI	42.4355	4.81E-08	0.204925
GOPC	181.165	0	0.932724
MTM1	78.1576	2.00E-15	0.869553
ZNF644	100.901	0	0.631459
ATP6V1G3	20.4189	0.00104252	0.654085
MOB3B	565.874	0	2.43474
EXOC4	65.1965	1.02E-12	0.490493
PRKRIP1	38.1258	3.56E-07	0.477723
CACNA2D3	31.4429	7.66E-06	0.620774
ADCY2	18.1754	0.00273448	0.594138
IFRD1	845.645	0	1.18397
TDP2	22.9691	0.000342189	0.269834
OSBPL6	2483.9	0	2.65919
GIGYF2	19.0418	0.00188796	0.241763
RBM26	163.128	0	0.37857
DNAAF9	22.4928	0.000421876	0.702557
LOC124417203	32.9884	3.78E-06	1.02824
MLLT10	87.3776	0	0.316355
MEF2C	23.6004	0.00025906	0.314875
PLOD2	106.61	0	1.39455
BBX	22.8237	0.0003648	0.133943
PIEZO2	47.2121	5.14E-09	0.820138
NFATC3	300.299	0	0.429809
UBN2	35.7438	1.07E-06	0.325578
CDH13	21.5793	0.000629329	0.654363
FTH1	2941.61	0	0.683439
HNRNPU	61.5863	5.71E-12	0.459949
TNS1	116.293	0	1.14901
ARL15	62.6053	3.51E-12	0.486905
RPS27A	786.799	0	0.309101
NOP58	161.154	0	0.282937
BRD3	42.2895	5.15E-08	0.723701
PLCB1	434.23	0	1.23195
HSP90AA1	3126.37	0	0.822862
RAB2A	159.587	0	0.24564
GADD45B	379.005	0	1.09927
SLIRP	21.8242	0.000565465	0.125951
IP6K2	260.328	0	0.756695
TIMM23B	52.704	3.87E-10	0.693839
NSMCE3	15.4451	0.00862058	0.244341
UBAP2L2	42.3867	4.92E-08	1.55308
LOC101748407	21.6998	0.000597044	0.506781
CLSTN3	78.8048	1.44E-15	1.12463
ATG5	15.8025	0.00743125	0.279524
SYNE2	22.1009	0.000500962	1.08916
APOA1	181.289	0	1.25918
ROMO1	70.3328	8.74E-14	0.296787
GARNL3	92.2082	0	0.616149
WAPL	140.395	0	0.277973
ANKRD12	153.668	0	1.23297
ACOX1	964.95	0	0.826326
REV1	37.9702	3.83E-07	0.483978
HS1BP3	37.379	5.03E-07	1.37517
CPSF2	18.566	0.00231462	0.504214
NUS1	28.5961	2.78E-05	0.199087
UBE2H	540.096	0	0.343402
SELENOI	15.9964	0.00685443	0.337627
RFTN1	67.9358	2.75E-13	0.350752
RPL8	529.362	0	0.292124
FOXK1	235.829	0	1.37693
ETV3	38.1996	3.44E-07	0.380518
PTRF	16.1755	0.00636054	1.12329
THSD7A	250.516	0	0.549668
LAMTOR3	22.8034	0.000368058	0.320976
PDXK	22.6387	0.000395693	0.268344
KRAS	323.198	0	0.823109
GUF1	24.2631	0.000193243	0.617272
KAT6B	60.1591	1.13E-11	0.270965
DLC1	67.2981	3.74E-13	0.581947
TAX1BP1	148.422	0	0.185868
ZNF839	29.9287	1.52E-05	0.612713
RBM3	415.768	0	0.352049
MAGI1	355.542	0	1.39775
TSC1	39.7964	1.64E-07	0.758455
CEP112	35.2438	1.35E-06	0.259362
EBF1	25.7133	0.000101416	0.934724
RAB3GAP1	59.5593	1.50E-11	0.785614
CLASP1	17.7144	0.00332642	0.26576
RAG2	420.253	0	1.01974
PIGA	204.474	0	1.70795
PTBP2	34.2618	2.11E-06	0.675016
TRAPPC9	49.873	1.47E-09	0.319201
FYB1	6016.84	0	2.07963
TLK1	97.4112	0	0.480589
POLK	44.4605	1.87E-08	0.431674
PIGK	101.7	0	0.617831
XKR4	15.6436	0.00793893	1.44801
METTL22	40.9295	9.70E-08	0.401287
SKAP2	51.5428	6.69E-10	0.308093
LSM7	58.9546	2.00E-11	0.549092
UBE2Q1	156.281	0	0.229442
EPC1	65.8861	7.34E-13	0.696866
2024-03-07	24.8036	0.000152041	0.427234
ANAPC10	71.2693	5.57E-14	0.668604
FBXL17	175.178	0	0.414906
TENM3	32.1306	5.60E-06	0.273025
RBBP6	34.5045	1.89E-06	0.202406
GNAQ	71.3736	5.31E-14	1.2396
C1orf52	48.4689	2.85E-09	0.616387
RPL15	501.751	0	0.189928
ASMTL	16.9348	0.0046251	0.638635
TSC22D4	1395.77	0	1.65783
MATR3	22.0508	0.000512076	0.164734
UQCRB	66.1959	6.33E-13	0.204362
SBNO1	151.244	0	0.280862
PPFIBP1	132.23	0	0.847594
DPYSL2	123.807	0	0.24023
AHRR	669.283	0	2.74357
NUB1	56.0633	7.89E-11	0.264141
ZMIZ1	1175.46	0	1.47505
MAP9	58.6349	2.33E-11	0.439881
BMPR2	185.601	0	0.439187
OGT	1362.43	0	1.04218
SHANK2	38.5752	2.89E-07	0.448655
ANKRD44	899.427	0	0.625974
RPL9	276.75	0	0.187894
TOPAZ1	23.788	0.000238451	1.65185
MPHOSPH10	40.7117	1.07E-07	0.324352
LOC101749016	44.7884	1.60E-08	0.345712
DPF3	63.8598	1.93E-12	0.340124
BRAT1	29.9421	1.51E-05	1.30308
DCUN1D4	51.3882	7.20E-10	0.506969
JAK2	672.943	0	0.649041
GPC6	53.4614	2.70E-10	0.348099
CTDSPL	61.3148	6.50E-12	0.458024
CBLB	2280.53	0	1.05902
LIN54	87.9943	0	0.8777
SCAPER	84.2948	1.11E-16	0.594562
DOCK9	48.3151	3.06E-09	0.491934
CSMD1	59.9988	1.22E-11	0.373817
FBXL2	60.2014	1.10E-11	0.929327
WDR26	132.446	0	0.859973
PPIP5K2	71.0231	6.27E-14	0.763657
LOC112530942	2068.04	0	0.727996
ZEB2	908.847	0	1.54227
SELENOT	41.268	8.28E-08	0.296318
FOXN3	140.975	0	0.590394
ELMO1	124.055	0	0.184176
TUBGCP5	22.9366	0.000347124	0.296236
KDM1A	134.117	0	0.344657
CENPV	132.554	0	1.26011
RBMS3	25.7542	9.96E-05	0.302976
IGHMBP2	20.5835	0.000970724	0.33074
FAM172A	82.9908	2.22E-16	0.288286
PNRC1	520.024	0	0.809468
ERC2	796.775	0	0.882348
WWOX	768.158	0	1.37506
C6orf62	234.124	0	0.251204
BRWD1	69.6534	1.21E-13	0.64022
CAMK1D	1386.24	0	1.34698
DMD	44.0004	2.32E-08	0.264799
PDLIM5	32.6788	4.36E-06	0.221956
ATRX	17.9934	0.00295474	0.253184
B2M	6378.91	0	0.844408
PDIA6	30.1233	1.39E-05	0.175181
LOC101747587	3386.12	0	0.989995
YWHAG	124.909	0	1.10083
GLCCI1	1523.05	0	1.37878
SOX5	64.7645	1.25E-12	0.809243
DIDO1	23.8562	0.000231372	0.246999
MIB1	31.0928	8.98E-06	0.177208
LOC415756	20.7501	0.000903015	0.51953
RAPH1	34.2031	2.17E-06	0.884202
NALCN	18.2855	0.00260907	0.574355
EPN2	463.476	0	0.485463
AFF4	104.632	0	0.553795
CCDC12	790.768	0	0.715987
TTC3	61.6783	5.47E-12	0.127887
EMC8	94.6807	0	0.355826
FOS	4189.76	0	2.01945
RBFOX1	68.9437	1.70E-13	0.392309
WSB1	99.5091	0	0.227523
COL1A1	108.868	0	0.791787
RCHY1	70.9089	6.63E-14	0.400779
CLASP2	39.2338	2.13E-07	0.19976
LOC101750820	35.7085	1.09E-06	0.445279
NDUFS5	41.3696	7.90E-08	0.44178
GTF2B	615.911	0	0.523819
RPS16	656.626	0	0.257621
BAZ1B	69.7426	1.16E-13	0.401264
PFKP	133.604	0	0.55668
RNF19A	72.0356	3.86E-14	0.96099
HSBP1	134.335	0	0.285783
PCNX1	119.844	0	0.248431
WASF2	35.0752	1.45E-06	0.222621
PMP22	144.548	0	4.04126
LRP1B	52.8706	3.58E-10	0.503122
GFI1	1350.84	0	1.18149
KLF12	74.278	1.32E-14	0.391194
GEN1	112.412	0	1.14771
POSTN	15.8546	0.0072716	1.02803
PPARA	35.1276	1.42E-06	0.477118
JTB	60.6746	8.82E-12	0.365087
BRD1	92.2145	0	0.484482
LOC107057310	43.594	2.80E-08	0.57737
DUSP16	700.665	0	0.994561
PFKFB3	316.3	0	0.622623
PRRC2C	132.361	0	0.329502
MYO1C	383.964	0	0.704463
LRBA	192.132	0	0.234806
ELK3	304.971	0	0.801806
CD2AP	105.682	0	0.613511
BEND5	116.394	0	0.501359
NARF	67.9811	2.69E-13	0.696662
KMT2E	55.176	1.20E-10	0.292979
ARHGEF3	1927.81	0	0.931441
ITK	1113.5	0	1.15174
PLPPR5	46.6949	6.56E-09	0.62036
STAG1	20.8875	0.000850667	0.146548
GRB10	187.643	0	1.01362
FBXO34	73.2051	2.20E-14	0.391458
F8A3	20.5534	0.000983502	0.239613
IDE	18.766	0.00212481	0.654894
LOC121106732	79.9156	8.88E-16	1.49649
NRP1	128.663	0	0.852775
MYL12B	150.315	0	0.291016
PACSIN2	44.8747	1.54E-08	0.501636
SYNGAP1	189.475	0	0.476819
INPP5K	344.402	0	0.629525
DNM3	43.9571	2.36E-08	0.658624
RPS6KA5	108.382	0	0.254059
AKAP12	385.922	0	1.40596
PTCD2	52.8362	3.63E-10	0.66161
DTYMK	23.5948	0.000259694	0.465036
NKAIN3	23.3103	0.000294439	0.7946
CCNL1	388.154	0	0.501939
COMMD2	31.9031	6.21E-06	0.16585
CLOCK	226.709	0	0.557789
ESRRG	202.204	0	0.879512
CALD1	23.6231	0.000256478	1.30774
SWT1	40.7241	1.07E-07	0.426272
SOX6	24.7327	0.000156906	0.417479
CNPPD1	59.2027	1.78E-11	0.207138
TCF12	27.6975	4.17E-05	0.282211
SASH1	109.029	0	0.803379
PDE7B	282.306	0	0.499214
VEGFC	120.978	0	1.29661
RPL27	332.995	0	0.157745
COMMD1	107.176	0	0.622961
NAMPTP1	114.047	0	0.609557
IFT80	539.222	0	1.21232
EEF1A1	871.566	0	0.185358
LOC107053527	23.4333	0.000278882	0.59013
SON	85.7465	0	0.317133
POLR3A	61.2484	6.71E-12	0.334735
ZBTB20	92.596	0	0.530168
HNRNPKL	119.753	0	7.63383
PECAM1	112.49	0	0.681039
DGKB	17.1378	0.00424573	0.258844
G3BP2	105.804	0	0.731138
DESI1	24.3208	0.000188364	0.553409
LOC107053297	132.254	0	1.24414
MAPK3	139.778	0	0.303152
STK11	71.4456	5.13E-14	0.579164
HMG20A	34.7616	1.68E-06	0.536735
MAGI2	26.4597	7.27E-05	0.341628
WWP1	143.259	0	0.417162
TTC28	23.6109	0.000257865	0.224143
SLC6A6	1029.34	0	0.495616
IMMP2L	98.3847	0	0.511256
HNRNPH1	551.794	0	0.229748
SIK1	424.279	0	1.421
UBASH3B	1332.27	0	1.93799
PSMA7	96.8121	0	0.427851
LPP	111.341	0	0.32435
ZCCHC17	43.747	2.61E-08	0.697177
EYA4	20.785	0.000889432	0.99998
RETSAT	70.1309	9.63E-14	0.790635
LOC121111076	64.6538	1.32E-12	0.25502
PCMT1L	45.6331	1.08E-08	1.09496
LRP12	83.6783	1.11E-16	0.317933
GIF	24.7692	0.00015438	2.64943
SMS	25.7375	0.000100329	0.269969
STK26	97.1206	0	0.193662
NT5C1B	50.1268	1.31E-09	0.857733
NBR1	210.217	0	0.653302
RAB14	277.966	0	0.336552
HOXA3	1018.55	0	2.53386
CHD2	190.907	0	0.230714
LSM14A	36.1363	8.92E-07	0.250372
COX3	676.612	0	0.10701
HPF1	52.7083	3.86E-10	0.65828
MORF4L2	144.069	0	0.332469
TOP1	72.8888	2.56E-14	0.281853
CEP290	37.2722	5.28E-07	0.325967
PRPSAP2	166.085	0	0.525577
NOVA1	116.827	0	1.47788
CFLAR	178.663	0	0.382146
LRP6	34.5616	1.84E-06	0.410852
RYR2	42.1429	5.51E-08	0.418935
SMAP1	76.0386	5.66E-15	0.513931
CNST	670.011	0	0.707116
PDE8A	34.3149	2.06E-06	0.152553
ETV6	76.387	4.77E-15	0.320091
ASB7	22.0001	0.000523569	0.561353
BNIP2	81.6003	3.33E-16	0.210603
PPIG	28.8765	2.45E-05	0.123468
HIVEP2	571.232	0	0.476101
UBE2I	29.4363	1.90E-05	0.348207
FAM13A	78.0167	2.22E-15	0.656962
CCDC91	73.9709	1.52E-14	0.627207
MAP4K4	480.745	0	0.632557
CSPP1	52.5618	4.14E-10	0.328774
LPIN1	104.201	0	0.475861
CNTRL	154.359	0	0.283372
CAPN2	159.614	0	0.727125
BIRC6	285.278	0	0.365562
RPS6KB1	85.7945	0	0.396423
TNRC6B	51.1246	8.15E-10	0.468642
TRAF3IP2	121.206	0	0.42734
RBMS1	354.344	0	0.502216
LUC7L3	396.543	0	0.420872
PAFAH1B2	39.2704	2.10E-07	0.540587
SCLT1	1734.91	0	1.43171
LRRTM4	24.4461	0.000178182	0.861868
CLIC4	23.4814	0.000273032	0.9046
PDE10A	21.8327	0.000563365	0.494418
SERTAD2	216.893	0	0.520869
RAD50	347.897	0	1.48977
SCAF8	33.9591	2.43E-06	0.219152
FGF7	26.2046	8.14E-05	0.834075
SIRT2	119.664	0	0.571476
RGS7	27.012	5.67E-05	0.588093
NT5DC1	108.08	0	0.937474
RPLP0	332.799	0	0.236317
GABRG3	21.4399	0.000668799	0.335742
DYNC2H1	35.0344	1.48E-06	0.572622
HSPE1	420.09	0	0.404092
FUNDC2	326.348	0	0.597544
UBE2Q2	245.17	0	0.36958
TMEM140	46.1296	8.55E-09	0.626342
LOC124417722	27.7869	4.01E-05	0.673038
EWSR1	37.499	4.76E-07	0.173791
RB1	400.307	0	0.348443
ZNF207	35.3031	1.31E-06	0.193324
TLE1	87.6714	0	0.944014
ZC3H12C	29.1864	2.13E-05	1.87248
CEBPD	3303.15	0	1.3208
HS6ST1	287.043	0	1.00793
SLA	4155.25	0	1.39928
STAG3	38.088	3.62E-07	0.623477
DNAJC3	69.128	1.56E-13	0.194451
MAFF	849.618	0	2.16394
DLG1	96.0386	0	0.538246
GSTK1	54.677	1.52E-10	0.82992
PHC1	18.445	0.00243743	0.70482
SPTBN1	264.114	0	0.445783
NFATC1	977.612	0	1.62287
TOP2B	86.4168	0	0.513965
SPTAN1	387.372	0	0.62679
SLX4IP	30.6564	1.10E-05	0.864299
RAB7A	1328.76	0	0.82116
BTBD9	45.8696	9.65E-09	0.44401
PARP8	141.371	0	0.713664
NBEAL1	903.458	0	1.65327
NDFIP2	353.361	0	0.373691
MRRFP1	18.7283	0.0021594	0.275517
ROR2	18.8834	0.00202067	0.588019
CDKAL1	43.715	2.65E-08	0.194423
LOC107053614	31.3598	7.95E-06	0.750451
BIN2	92.9424	0	0.301687
DYNC1LI2	91.8007	0	0.338123
MCUB	42.9604	3.76E-08	0.693959
TTC14	54.0003	2.10E-10	0.403825
ITGB2	642.535	0	0.347334
ARID2	107.075	0	0.34482
USP25	93.4297	0	0.369854
PREX1	1998.55	0	2.12811
PNISR	260.877	0	0.327759
WDR36	69.9554	1.05E-13	0.307018
MTUS2	19.7179	0.00141156	0.667
BSG	265.279	0	0.464956
SYK	38.8727	2.52E-07	0.773183
CR1	24.8551	0.000148605	1.82174
PRR5L	387.639	0	1.03959
SHFM1	215.072	0	0.456571
SLC16A12	99.422	0	2.11376
ELOVL6	15.6713	0.00784804	0.24898
RBP5	443.721	0	2.27401
LOC107054097	45.1392	1.36E-08	1.42199
ANKRD11	61.0936	7.22E-12	0.329539
ACVR2A	36.9255	6.20E-07	0.471866
TTC17	23.1514	0.000315794	0.175065
CHMP1B	80.0123	8.88E-16	0.695043
GRID2	59.4627	1.57E-11	0.42647
QSER1	22.0163	0.000519886	0.343082
STRBP	28.8041	2.53E-05	0.322414
PCDHGA2	38.138	3.54E-07	0.375357
MKRN4P	281.626	0	0.342566
ADGRL3	19.1049	0.00183753	0.332057
NUCKS1	98.1027	0	0.435271
PTPRF	370.152	0	1.41399
TFDP2	1928.93	0	1.92039
KIF13A	41.4623	7.57E-08	0.258548
UHRF2	560.891	0	1.18642
NDRG1	203.949	0	0.626578
PPP4R1	30.9639	9.52E-06	0.674824
DDX5	1193.07	0	0.237888
PIN1	23.2531	0.000301948	0.139816
MRPL1	19.9397	0.00128272	0.277553
EDN3	15.4384	0.00864437	0.690156
CAMK2D	334.097	0	0.71122
COL6A1	60.9618	7.69E-12	1.45172
KMT5B	205.254	0	0.284998
CCND1	2748.25	0	1.97673
RALGPS2	61.9765	4.74E-12	0.307646
CHST11	57.2607	4.47E-11	1.14546
KIAA0232	121.803	0	0.329164
ARHGAP5	132.131	0	0.937508
NAV2	33.2885	3.30E-06	0.362077
CCT4	346.325	0	0.440591
TRMT10C	24.3837	0.000183185	0.185985
CBX6	33.3213	3.25E-06	0.284012
CARHSP1	94.7439	0	0.699429
AGMO	27.789	4.00E-05	0.711722
NSUN3	19.8575	0.00132904	0.963895
CLK3	35.8247	1.03E-06	0.377386
SPSB4	27.4003	4.77E-05	0.463798
LATS2	31.5459	7.31E-06	0.422111
HLCS	35.6394	1.12E-06	0.369754
POGZ	37.5241	4.70E-07	0.593892
RPS10	263.683	0	0.150373
LOC101750098	61.5481	5.82E-12	0.603338
H2AZ2	1357.57	0	0.702894
RBM25	143.604	0	0.193837
PAXBP1	19.5886	0.00149243	0.232426
LOC100859602	21.6384	0.000613281	0.545955
STK38	165.702	0	0.421922
RPL21	388.636	0	0.164869
LOC422901	56.6365	6.01E-11	0.45003
CDV3	290.219	0	0.440791
TOX3	32.6695	4.38E-06	0.46241
RPS26	202.508	0	0.380709
PTDSS1	30.4727	1.19E-05	0.166426
C4ORF19	289.274	0	2.3087
GARRE1	183.143	0	0.732691
LOC420419	638.345	0	0.88323
CD99L2	174.126	0	0.612989
GPCPD1	21.8099	0.000569007	0.629687
YAF2	31.9966	5.95E-06	0.345376
SLC2A14	968.708	0	0.446664
SMIM11	2425.49	0	1.76515
CORO1C	349.628	0	0.680656
CCDC167	17.9871	0.00296268	0.553985
GSN	1047.97	0	2.3471
ATXN7L1	142.472	0	0.332271
RBPJ	36.4472	7.73E-07	0.215606
SUPT16H	19.623	0.00147051	0.487663
RSRP1	219.465	0	0.327774
KARS	123.635	0	0.256329
CLSTN2	1028.35	0	2.31726
LOC124417794	798.197	0	1.6492
JARID2	1379.1	0	1.09481
ZBTB21	35.9316	9.80E-07	0.415742
BEGAIN	17.1682	0.00419155	1.76807
KIF3A	60.3811	1.01E-11	0.550415
GNAS	56.7495	5.70E-11	0.400097
UTP3	31.9977	5.95E-06	0.336957
TOX2	408.989	0	0.461148
MACROD2	141.563	0	0.582763
DCTN3	28.7412	2.61E-05	0.414456
RPL34	866.394	0	0.329067
U2SURP	21.4485	0.000666277	0.08555
CDC5L	28.9314	2.39E-05	0.15654
NAA50	111.841	0	0.424306
HSPA12A	23.8916	0.000227782	0.468438
TEF	105.769	0	0.82925
NA.1	NA	NA	NA
NT5C3A	95.8058	0	0.930186
NR3C1	48.3942	2.95E-09	0.324711
MT4	650.598	0	1.10767
OXCT1	299.627	0	0.899013
PI4KA	47.497	4.50E-09	0.503732
CNOT11	39.4229	1.95E-07	0.430626
MAP6D1	36.917	6.22E-07	1.68032
ZCCHC11	47.5566	4.37E-09	0.142889
PHLDA1	29.6564	1.72E-05	1.31782
TBC1D14	265.05	0	0.98022
IER3IP1	66.2952	6.04E-13	0.273347
PHF3	83.3639	1.11E-16	0.454096
SRPK1	163.426	0	0.352555
RPL38	278.812	0	0.120108
LOC112530311	28.3569	3.10E-05	0.738536
NMRK1	25.9873	8.97E-05	0.584916
RAP1B	831.686	0	0.512246
BRD7	189.102	0	0.506027
UBAP1	216.951	0	0.451216
RNF213	179.655	0	0.850771
BCKDHB	42.3012	5.12E-08	0.74306
ERCC6	15.6544	0.00790311	0.508595
C1orf159	97.2957	0	0.501329
UBAP2	90.9355	0	0.243071
TARDBP	18.0196	0.0029219	0.498899
ROBO1	51.7261	6.14E-10	0.341273
KCNMA1	18.9647	0.00195146	0.235988
TSHZ3	33.0802	3.63E-06	1.43816
NDUFV2	48.2458	3.16E-09	0.22621
FUBP1	129.94	0	0.28882
DHRS3	16.9933	0.00451253	0.546212
MET	27.3013	4.98E-05	0.550713
PLA2R1	22.5582	0.000409928	0.839249
IDH1	92.5513	0	0.941581
ACADL	128.64	0	0.37805
LOC107054270	33.3296	3.24E-06	1.35452
PPP3CB	40.9132	9.77E-08	0.135466
SDC2	125.527	0	1.10509
TIAM2	117.48	0	0.669398
ATP11C	106.567	0	0.473431
RPL6	499.984	0	0.171829
LATS1	26.3505	7.63E-05	0.466592
USP53	33.3603	3.19E-06	1.2776
EIF4A2	391.117	0	0.374786
RNF103	99.4766	0	0.395284
RAPGEF2	95.6001	0	0.388575
CNTN5	43.1537	3.44E-08	0.462594
UPF3B	68.3349	2.27E-13	0.18983
PRDM16	73.1086	2.31E-14	0.7732
XPO1	485.23	0	0.465421
PTTG1IP	171.045	0	0.70544
RPS12	479.005	0	0.257072
KAT2B	87.268	0	0.884712
LOC421268	19.2332	0.00173905	0.488891
CAB39L	116.898	0	1.131
SHPK	59.9732	1.23E-11	0.39743
MIER1	15.8123	0.00740089	0.110648
CTDP1	109.2	0	0.382333
MOB4	147.592	0	0.836712
UBAC2	43.646	2.73E-08	0.140465
MCTP1	454.182	0	0.880815
SIVA1	106.525	0	0.527025
ARGLU1	465.251	0	0.669407
PNN	28.6997	2.66E-05	0.165052
MARK1	43.6111	2.78E-08	1.10931
BCL2	53.5016	2.65E-10	0.607931
GLG1	146.752	0	0.695448
TRPS1	241.847	0	0.384743
CMSS1	34.2102	2.16E-06	0.340203
FAM21C	31.6236	7.05E-06	0.126377
OPHN1	22.0795	0.000505695	1.28684
HDGF	50.8748	9.17E-10	0.107745
ARHGAP29	313.872	0	0.329901
AP1S2	211.611	0	1.13471
LOC107052251	20.0138	0.0012423	0.710301
BAMBI	35.1861	1.38E-06	0.738594
TM9SF2	55.207	1.18E-10	0.228697
ANKS1B	30.0609	1.43E-05	0.4223
BEND6	32.1104	5.65E-06	0.377358
BBS7	217.274	0	0.439567
PHF14	117.898	0	0.384018
AFAP1	36.88	6.33E-07	0.962445
ESD	485.423	0	0.764493
TNRC18	332.923	0	1.47132
PPARG	104.888	0	0.83994
UPF2	24.6098	0.000165701	0.29683
CLDN1	16.6206	0.00527851	1.71254
ZNF326	20.3361	0.00108062	0.292984
STAU2	35.6292	1.13E-06	0.228955
USP9Y	167.992	0	0.258
COX1	1084	0	0.135478
GIMAP7L5	16.1757	0.00636003	0.375517
TECPR2	38.673	2.76E-07	0.791722
SNX8	386.508	0	0.647753
SPAG16	362.183	0	0.780104
SMIM19	306.723	0	0.49512
COL6A2	27.2723	5.05E-05	1.98329
FAM46A	252.881	0	0.919291
PLEKHA1	138.946	0	0.342068
LY75	948.612	0	1.34075
TMEM245	128.384	0	0.388337
PTPRG	71.8692	4.19E-14	0.560185
ZPBP1	55.513	1.02E-10	1.51246
ALS2L	151.168	0	0.986589
SORCS2	35.7612	1.06E-06	0.435087
SLC12A4	251.614	0	0.819375
RSRC1	93.1337	0	0.439866
PGM2L1	49.0271	2.19E-09	0.925512
COL5A2	134.959	0	1.42139
HCFC2	18.1075	0.00281461	0.363214
PLEKHA5	26.2639	7.93E-05	0.396025
GCN1	20.6677	0.000935891	0.426237
ACVR2B	274.833	0	0.669872
NUTF2	42.1493	5.49E-08	0.212253
MAP7D3	58.4706	2.52E-11	0.172399
GLRX	247.209	0	1.84621
FOXP1	274.768	0	0.419769
SETD7	36.7462	6.73E-07	0.301988
STIM2	269.484	0	0.574136
SPICE1	41.6211	7.03E-08	0.510971
PPP2R3B	15.7382	0.00763267	0.918974
RPGR	26.3089	7.77E-05	0.774306
MAF	1990.04	0	2.04487
MPHOSPH8	40.3896	1.25E-07	0.16795
MGAT5	2983.16	0	0.946647
DHRSX	54.56	1.61E-10	0.622897
SMCO4	42.1483	5.50E-08	1.11219
ARHGAP17	224.891	0	0.419278
HNRNPA2B1	205.553	0	0.16443
TRAF7	101.379	0	0.423253
COX17	429.833	0	0.30359
HMGB1	613.869	0	0.466302
RPL23	473.014	0	0.259182
PRELID1	367.277	0	0.582051
ANK3	129.447	0	0.461606
RPL11	384.274	0	0.143967
PIKFYVE	735.806	0	1.18441
FEZ2	47.4878	4.52E-09	0.892643
PID1	41.5578	7.24E-08	3.32239
RAB1B	381.183	0	0.272387
SUPT3H	51.0033	8.64E-10	0.314746
GRID1	19.3987	0.00161963	0.329002
UTRN	404.048	0	0.28269
HECTD2	15.8343	0.00733331	0.371367
PKP2	26.0784	8.62E-05	1.73591
CASP8AP2	51.0533	8.43E-10	0.485139
MICAL3	22.5944	0.000403463	0.479092
LYAR	58.2325	2.82E-11	0.642495
AOPEP	577.984	0	0.607051
PSME4	156.536	0	0.336911
ZRANB1	109.93	0	0.973551
CDC42BPB	48.2536	3.15E-09	0.235646
MTOR	42.374	4.95E-08	0.276702
DHX15	45.0511	1.42E-08	0.328858
SH3BGRL	186.399	0	0.411931
NRARP	371.705	0	1.03654
CAST	646.544	0	0.651257
FNBP1	1101.95	0	0.694303
SNX29	188.282	0	0.962159
PIK3IP1	168.221	0	0.472278
HID1	27.3536	4.87E-05	0.697451
DNAJB2	48.5544	2.74E-09	0.872558
PAICS	126.13	0	1.14642
TRANK1	104.722	0	0.32365
ACVR1C	18.4299	0.00245316	0.360907
C14orf2	364.071	0	0.275206
CACNA2D1	33.5157	2.97E-06	0.415479
SLTM	36.4075	7.87E-07	0.183074
SRGAP1	40.9536	9.59E-08	1.59411
PPP2R2C	51.1936	7.89E-10	0.71904
MKL1	74.3198	1.29E-14	0.202335
DISC1	44.9223	1.50E-08	0.393026
PPP4R3B	38.5384	2.94E-07	0.171846
LY6E	123.788	0	0.377212
CTSB	23.6673	0.000251518	0.102609
HOOK3	31.6763	6.89E-06	0.172677
AKAP13	1531.91	0	0.533394
LHFPL2	24.7828	0.000153453	0.67476
EXOC2	16.1272	0.00649001	0.230747
SLC16A10	355.858	0	2.13868
ZNF652	20.2986	0.00109833	0.631101
SSX2IP	276.471	0	2.20249
GLMP	37.3695	5.05E-07	0.503225
DDX49	39.2818	2.08E-07	0.594683
LOC124417205	137.422	0	0.607775
ANKRD10	189.773	0	0.722201
BRD2	104.26	0	0.655254
COL22A1	21.5943	0.00062522	0.436118
RC3H1	269.784	0	0.330537
LOC100859072	31.4566	7.61E-06	3.39783
LOC427439	54.3275	1.79E-10	0.33613
CCDC173	26.6631	6.63E-05	0.446845
DEF6	222.756	0	0.336278
MTF2	128.209	0	0.786268
GALNT7	210.306	0	0.713239
NPAS3	91.2627	0	0.550253
PDE7A	72.4543	3.16E-14	0.592145
BOD1L1	36.7667	6.67E-07	0.438377
CCDC18	189.613	0	0.906254
ECHS1	28.0844	3.50E-05	0.283467
CTBP2	178.804	0	1.47676
LETM1	101.757	0	0.55881
LOC107052657	16.9078	0.00467796	0.899993
TNIK	169.599	0	0.547068
ADGRL2	130.226	0	0.979523
ZCCHC24	279.493	0	0.864014
PTPN3	117.143	0	1.74429
CEP85	82.3753	2.22E-16	1.18549
LOC101747667	43.3059	3.20E-08	0.403576
MAGI3	20.0847	0.0012048	0.282154
RPL3	436.662	0	0.144436
LAT2	534.216	0	0.608011
LOC121107791	179.317	0	0.683473
EFCAB5	19.1945	0.00176816	0.63199
ZFYVE26	127.48	0	0.912124
PNKD	32.662	4.39E-06	0.310448
ZCCHC7	53.3784	2.81E-10	0.412352
CSE1L	19.3447	0.00165767	0.507856
DUSP10	1297.5	0	0.962995
FAM120C	90.8975	0	0.198318
RAE1	36.22	8.58E-07	0.21405
PLXNB2	92.9769	0	0.891687
RALA	1029.34	0	1.44748
PTGER4	2667.39	0	1.41859
HERC1	38.3505	3.21E-07	0.289921
LOC112530509	19.9998	0.00124983	0.65444
DLGAP2	18.6269	0.00225514	0.593259
GTF2H1	57.5515	3.89E-11	0.181778
FUT8	33.8394	2.56E-06	0.170521
C1orf131	48.6908	2.57E-09	0.219081
KLHL29	24.5638	0.00016912	0.375528
TAF10	21.5343	0.000641807	0.420722
MTMR6	43.3005	3.21E-08	0.692277
KIF26B	18.6219	0.00225998	0.594138
PRPS1L1	33.7158	2.71E-06	0.141714
AKAP1	171.334	0	0.464852
RPS15A	315.214	0	0.115879
HELZ2	217.931	0	0.76357
RPL5	289.035	0	0.123936
SFPQ	178.015	0	0.246891
CKAP5	39.9237	1.55E-07	0.578386
DSCAM	36.56	7.34E-07	0.408991
MDM2	88.0265	0	0.863139
ENO1	1773.41	0	0.579142
FMR1	21.4329	0.000670827	0.162866
KLHL2	33.7777	2.64E-06	0.393348
STRN	105.673	0	0.368824
BEND7	250.702	0	0.500449
TRAK1	49.7696	1.54E-09	0.760068
XPO1P	29.8527	1.58E-05	1.05507
TXNDC17	46.4245	7.44E-09	0.26594
USP22	22.531	0.00041486	0.10325
PTPRE	35.2584	1.34E-06	0.529152
LRRC8D	43.9062	2.42E-08	0.227446
MYC	297.324	0	0.345881
AHR1A	2251.35	0	1.51379
RSRC2	52.0929	5.16E-10	0.559686
LOC107053450	46.7622	6.35E-09	0.381117
TLN1	398.098	0	1.49025
VPS13D	432.093	0	0.449038
KLF2	1353.34	0	2.99289
ZFR2	27.2041	5.21E-05	0.493729
RAI2	282.655	0	1.41879
SF3B1	642.785	0	0.584627
LOC121107538	177.796	0	0.236534
USP16	420.099	0	0.630927
ATF4	610.977	0	0.870236
MAPKAP1	26.6768	6.59E-05	0.558434
KLHL1	15.123	0.00984965	1.06399
CTNNA3	34.3273	2.05E-06	0.498473
SIPA1L1	209.914	0	0.305317
ZRANB2	116.762	0	0.53667
SMURF2	149.318	0	1.30964
GALNTL6	20.2981	0.00109852	0.397781
HNRNPM	155.796	0	0.224487
RPL36	275.483	0	0.142342
FUS	248.139	0	0.324765
BTG2	1413.9	0	1.61004
DDX17	1081.73	0	0.730319
PIM3	194.631	0	1.14329
INTS6	152.145	0	0.891721
SRSF11	157.475	0	0.631359
FAM65C	41.0234	9.28E-08	0.570816
DGKI	34.4585	1.93E-06	1.62211
KIF13B	100.064	0	1.12905
MARK3	985.725	0	0.686245
LOC374195	45.0341	1.43E-08	0.628718
NEUROD6	35.1048	1.43E-06	2.07673
ACSS2	42.6538	4.34E-08	0.708293
VPS13B	76.1757	5.33E-15	0.255311
PACRG	18.3818	0.00250402	0.656837
ATG2A	55.3973	1.08E-10	0.50396
SNX24	868.811	0	2.10486
HERC4	189.656	0	0.349773
SPHKAP	148.1	0	1.76086
LOC121110313	19.7708	0.00137973	0.338331
RPS6KA6	94.1237	0	0.911181
ABCC4	106.918	0	0.412025
PDE4D	947.235	0	0.527004
RFC5	110.122	0	0.325258
ID2	1659.67	0	0.999849
NPNT	17.95	0.00300974	1.12657
PIK3R1	1996.59	0	0.8998
GALNT3	650.892	0	2.61421
PSMA3	1301.69	0	0.925717
PDE1C	18.9738	0.00194387	0.495928
GSK3A	528.063	0	0.582966
MKL2	53.1754	3.10E-10	0.529223
ADRM1	25.8117	9.71E-05	0.250149
SLC20A2	20.7916	0.000886888	0.497462
LOC124417348	24.7315	0.00015699	0.989001
SH3PXD2A	102.464	0	1.20074
IRF7	34.6314	1.78E-06	0.223753
MDN1	109.562	0	0.64513
NRG1	30.1535	1.38E-05	0.896782
HDGFRP2	39.9436	1.53E-07	0.32837
VTI1A	41.2624	8.30E-08	0.345397
TGFBRAP1	21.1168	0.00076993	0.46611
LOC101747532	39.2811	2.08E-07	0.581237
EDC3	37.2739	5.28E-07	0.178838
ROBO2	48.9162	2.31E-09	0.57163
SYBU	25.7116	0.000101495	0.650902
ARID4B	313.458	0	0.275722
ND3	1081.48	0	0.274798
DNAH10	26.0635	8.67E-05	2.06859
AKAP9	126.224	0	0.389565
MIS18BP1	35.8343	1.03E-06	0.891899
ATP5G3	451.147	0	0.317554
IRF2	58.2009	2.86E-11	0.440863
PAPOLB	91.5556	0	0.411515
HDDC2	57.1146	4.79E-11	0.261422
RAD21L1	93.674	0	0.481181
SURF2	35.0209	1.49E-06	0.1756
FLNB	223.652	0	0.331002
PRKD1	110.393	0	0.386166
HNRNPA3	153.792	0	0.144509
BIRC8	55.3894	1.09E-10	0.406306
MAN1A2	34.7743	1.67E-06	0.421713
CUL3	44.6876	1.68E-08	0.426566
LRRC4C	32.995	3.77E-06	0.538241
TENM1	48.7371	2.51E-09	0.458584
ZDHHC16	22.002	0.000523144	0.964986
SFSWAP	112.688	0	0.4294
ABCD2	69.2938	1.44E-13	0.481937
HIF1A	1794.01	0	1.19232
C10orf128	570.439	0	2.87299
FAM169B	177.212	0	0.765317
ENOX1	18.5241	0.00235643	0.258649
ERAP1	125.276	0	0.419994
STIM1	1588.39	0	1.17796
KIDINS220	62.4968	3.70E-12	0.231412
ACSS1A	26.4603	7.26E-05	0.603412
PAN3	145.424	0	0.526342
ANXA1	93.5591	0	1.66483
IWS1	96.6249	0	0.205145
HMGN5	250.524	0	0.536364
OARD1	62.8881	3.07E-12	0.713307
PRKAR2A	950.593	0	1.28666
LHFPL3	33.9392	2.45E-06	0.919399
NRDC	30.7354	1.06E-05	0.177641
ATXN2	26.3584	7.60E-05	0.529181
RPS27	175.496	0	0.18337
HCN1	315.741	0	0.89266
DOCK3	24.5431	0.000170684	0.652003
PTK2	45.7722	1.01E-08	0.567981
PTPN2	976.781	0	0.578998
KCTD5	140.438	0	0.827811
ROCK1	1568.81	0	0.761542
AARSD1	39.1796	2.19E-07	0.174754
WNK2	35.5756	1.15E-06	1.41825
ADAM10	64.5787	1.37E-12	0.314572
FOXP2	22.2646	0.000466294	0.448086
PRDX6	189.502	0	0.530662
MAML3	147.157	0	0.471685
ZYX	123.307	0	0.484877
TFDP3	707.627	0	0.994481
SPATA5	53.8492	2.25E-10	0.395975
NF1	609.699	0	0.490696
CLEC16A	134.639	0	0.728222
BRF1	59.1418	1.83E-11	0.244439
2024-03-05	29.0065	2.31E-05	0.543641
ARHGEF12	291.915	0	0.974957
SRSF10	50.1646	1.28E-09	0.20714
RAP1GDS1	68.7536	1.86E-13	0.244059
VCPKMT	58.1837	2.88E-11	0.32146
CNTNAP2	171.674	0	0.517113
MBTD1	55.4461	1.06E-10	0.655339
MYH10	25.9001	9.33E-05	0.833686
NCALD	430.225	0	0.745666
BTBD8	60.1363	1.14E-11	1.10275
EHD3	620.572	0	0.616306
APLP2	111.673	0	0.806262
EIF3J	121.795	0	0.441262
C12orf75	464.745	0	1.70144
PTTG1IP2	42.2661	5.20E-08	0.233485
SLC30A1	16.4975	0.00555833	0.498693
EIF5B	35.7891	1.05E-06	0.330058
ELP4	43.596	2.80E-08	0.485617
JMY	90.1112	0	0.303754
GRM8	36.3018	8.27E-07	0.770968
C21orf58	270.016	0	3.52569
KLF6	1048.08	0	1.12821
LOC107051757	18.3747	0.00251162	0.432418
FLI1	100.822	0	0.360262
ABCA1	1586.66	0	1.24781
MGA	20.0785	0.00120805	0.0922649
GNB4	166.14	0	0.530261
EXD3	25.7071	0.000101699	0.348959
COLQ	28.8913	2.44E-05	0.710795
PSMC6	45.5056	1.15E-08	0.344885
FBXO3	22.8005	0.00036853	0.278552
TBXAS1	117.923	0	0.545991
CDK17	25.1237	0.000131877	0.280777
SLC44A1	515.598	0	0.998053
C11orf58	37.3364	5.13E-07	0.277212
SETD2	22.9894	0.000339139	0.304852
ADK	101.374	0	0.735352
DACH1	49.6493	1.63E-09	0.432898
KMT2C	236.29	0	0.45574
SACS	36.2023	8.65E-07	0.395411
SLC23A2	1715.99	0	1.14404
RREB1	269.199	0	1.38656
WDR48	170.908	0	0.502643
LOC121106455	1111.28	0	3.28032
PSMD10	48.6428	2.63E-09	0.379915
ID1	203.141	0	1.42016
SYTL2	949.797	0	1.00991
PBX1	25.1142	0.000132435	0.171242
MCRIP1	101.009	0	0.234157
GNAL	87.6698	0	0.492554
THOC2	31.4037	7.80E-06	0.142232
ACTR8	63.7368	2.05E-12	1.01308
EP300	27.0477	5.58E-05	0.350987
HOOK1	101.86	0	1.1413
ACSL1	29.3055	2.02E-05	0.681326
GATAD2A	164.56	0	0.536894
LOC124416941	1645.38	0	1.75018
BDH1A	36.7558	6.70E-07	0.146823
RHOA	805.492	0	0.275514
RBM34	71.6917	4.55E-14	0.440907
RPL24	391.094	0	0.201585
NONO	96.5899	0	0.194701
DNLZ	74.2977	1.30E-14	0.604151
TTC4	16.0138	0.00680482	0.195865
ZDHHC14	33.7424	2.68E-06	0.273518
SLC39A10	48.2284	3.19E-09	0.33937
RPL12	652.83	0	0.18147
CTR9	28.7541	2.59E-05	0.256112
DCBLD2	128.779	0	0.751075
ST7	35.3526	1.28E-06	0.561243
PTMS	116.753	0	0.322513
NSMAF	248.35	0	1.0638
VIPR1	44.6647	1.70E-08	1.07099
LOC107051948	110.102	0	0.736419
RPLP1	951.429	0	0.363728
PITPNM2	346.411	0	0.6943
MYO1E	38.4777	3.02E-07	0.282165
LOC107050955	77.5354	2.78E-15	0.683063
KLHL5	94.9035	0	0.707928
ZNF521	373.221	0	1.16904
ALPK1	50.4165	1.14E-09	0.861234
AFDN	22.5925	0.000403801	0.912643
GOLIM4	228.758	0	1.21934
PCDH15	73.9572	1.53E-14	0.514695
UQCRHL	57.9389	3.24E-11	0.14268
WTAP	78.0086	2.22E-15	0.363877
GTF2A1	24.92	0.000144381	0.226947
BRAF	96.7146	0	0.281953
SNX14	15.3246	0.00906164	0.333702
C17orf75	50.5908	1.05E-09	0.315326
IL16	740.468	0	0.447147
MTMR12	133.574	0	1.30752
CDC14B	102.223	0	0.955872
SLC24A4	1269.96	0	1.24308
BNC2	23.9683	0.000220181	0.329133
PTCRA	189.117	0	1.32878
NYX	2360.98	0	0.450078
ARRDC2	103.522	0	0.434977
UMAD1	165.117	0	1.0819
HERC2	359.124	0	0.644239
AP3B1	153.268	0	0.320037
SLC4A11	66.7135	4.94E-13	1.31612
PROX1	57.6183	3.77E-11	0.908183
IPO5	56.7271	5.76E-11	0.585278
DIS3L2	150.057	0	0.733376
PCDH9	26.8118	6.21E-05	0.241353
ATP7A	18.7212	0.002166	0.759073
MYO9A	208.529	0	1.97301
AGL	41.1097	8.92E-08	0.498403
EPB41L2	683.519	0	0.803446
ZCCHC8	17.4176	0.00377219	0.4372
SAFB	28.1412	3.42E-05	0.307213
EIF5	2011.43	0	0.56971
MYCBP2	190.11	0	0.243144
MSL2	60.7337	8.57E-12	0.530202
LOC112531858	202.984	0	0.721494
CTNND2	22.8759	0.000356518	0.459568
PLXNC1	535.926	0	2.34098
LOC415641	71.6716	4.60E-14	0.588287
TOMM6	133.769	0	0.311224
SEMA6D	32.9601	3.83E-06	0.396042
TNRC6C	147.29	0	0.561508
TMEM117	20.9028	0.000845042	0.655936
LOC124417996	86.9829	0	1.07575
RUBCNL	483.502	0	0.838568
ANAPC13	45.8127	9.92E-09	0.483375
NEBL	17.8996	0.00307484	0.360822
MAFB	16.407	0.00577316	0.991649
PLPP1	871.616	0	0.826851
ZMYM2	54.878	1.38E-10	0.561149
ZNF292	33.0557	3.67E-06	0.586518
TTC39C	111.581	0	0.81395
NAP1L4	69.926	1.06E-13	0.166594
EXOSC9	30.5123	1.17E-05	0.379041
POLR2B	19.3259	0.00167113	0.186507
KCNQ5	656.507	0	0.601539
GDPD5	128.182	0	1.17738
MED13L	257.533	0	0.729526
AHCTF1	16.8641	0.00476485	0.405787
LGMN	486.939	0	0.792808
KRT7	20.9145	0.000840748	0.95798
DAW1	2428.77	0	3.07906
S100A6	135.162	0	2.85494
SASS6	85.8065	0	0.730729
DCAF1	31.6952	6.83E-06	0.351893
NDUFS6	27.1638	5.30E-05	0.156533
MZT2B	327.643	0	1.11978
SCOC	279.629	0	0.879885
NASP	18.0303	0.00290862	0.414752
SNX9	57.707	3.62E-11	0.488539
DENND4C	28.3954	3.05E-05	0.256129
RPS25	371.868	0	0.265985
DUS3L	68.9852	1.67E-13	0.30722
CHN2	71.4209	5.18E-14	0.40856
RPS28	417.915	0	0.179369
STAT5A	99.5164	0	0.202019
MYO9B	1943.03	0	1.0315
PDS5A	42.5814	4.49E-08	0.466229
SRSF6	240.639	0	0.464606
DAP	138.894	0	0.695619
MFSD2A	140.259	0	1.23122
GMIP	272.236	0	0.51868
IQSEC1	35.8452	1.02E-06	0.367
SBF2	61.5257	5.88E-12	0.54822
THUMPD3	41.9624	5.99E-08	0.405816
ZDHHC20	313.693	0	0.715325
VDAC1	93.608	0	0.542924
LOC107053729	33.3313	3.23E-06	0.974388
NCOA4	55.2931	1.14E-10	0.364233
TBC1D5	881.956	0	0.86577
RAB3GAP2	25.8489	9.55E-05	0.206007
KLF10	176.36	0	0.275547
ALDH6A1	101.314	0	1.75603
UHRF1BP1L	68.6602	1.95E-13	0.389755
WDFY4	104.979	0	1.01443
RPL18A	254.389	0	0.171627
GAK	2122.82	0	0.626485
OSBPL3	1849.54	0	2.93719
TBL1X	279.403	0	0.647913
LOC121110691	15.7179	0.00769753	0.701666
SERBP1	462.121	0	0.204571
EIF1AX	81.9129	3.33E-16	0.323445
INO80D	53.3351	2.87E-10	0.703337
WBP4	67.0445	4.22E-13	0.468207
COL6A3	37.5413	4.66E-07	2.20461
VAPA	254.385	0	0.665174
CYP20A1	20.4291	0.00103796	0.595535
PGGT1B	17.9085	0.00306325	0.200135
CPNE8	50.9308	8.94E-10	0.839675
CELSR1	412.223	0	2.11092
CTNNA1	52.7024	3.87E-10	0.308294
NSMCE2	358.067	0	1.15683
ITGA1	255.584	0	0.485288
MTMR3	319.752	0	0.400304
PSMB7	90.7369	0	0.278471
PARK2	69.6236	1.23E-13	0.697975
CRY2	155.729	0	0.647624
GORASP2	29.194	2.12E-05	0.499806
CFL2	28.0527	3.55E-05	0.415007
MLXIP	116.586	0	0.517174
EPFIP1L	20.6271	0.000952528	0.290025
TYW5	62.9195	3.03E-12	0.879964
PLCL2	106.038	0	0.39585
LARP7	34.3396	2.04E-06	0.476119
BAK1	174.181	0	0.502212
TMEM132B	18.4441	0.00243833	0.773152
RAD23B	134.346	0	0.802418
PDZRN3	70.2561	9.06E-14	1.50622
SLC9A8	34.6209	1.79E-06	0.490293
CUX1	1360.56	0	1.10075
CARMIL1	65.7578	7.80E-13	0.638477
CPNE4	41.0835	9.03E-08	0.515761
TBL1XR1	272.722	0	0.353922
NFIL3	2924.73	0	1.43294
GUK1	123.602	0	0.849201
PPP2R5C	96.2619	0	0.452868
EMC1	36.3257	8.17E-07	0.274963
TRAPPC10	109.143	0	0.761773
PTP4A3	588.161	0	1.02528
TOMM7	52.2923	4.70E-10	0.229252
LRMDA	240.622	0	0.61186
CLTC	184.108	0	0.397202
FAM162A	17.0426	0.00441966	0.492388
KIAA2026	41.8375	6.35E-08	0.234618
ATP5E	452.867	0	0.317534
LOC107053863	15.1625	0.00968996	0.456634
CUL9	62.0568	4.56E-12	0.620943
SAP130	27.9893	3.66E-05	0.607087
CITED4	56.6896	5.86E-11	0.320807
CRAMP1	153.299	0	0.848062
PTPN14	820.609	0	0.922635
RAD51AP1	37.1523	5.58E-07	0.358593
IGFBP2	228.185	0	1.75783
RBM10	672.894	0	0.55787
D2HGDH	31.1577	8.72E-06	0.758058
VLDLR	26.3909	7.49E-05	1.38367
SRSF1	102.197	0	0.411206
WASHC1	71.226	5.70E-14	0.737818
FRA10AC1	91.4992	0	0.603659
DOCK5	132.947	0	1.24132
OLFML3	18.2653	0.00263164	1.18639
LOC121110182	15.5507	0.00825106	0.589177
TMEM14C	73.134	2.28E-14	0.764365
TBK1	194.734	0	0.423034
ARPC2	657.06	0	0.518748
IFNAR1	459.233	0	0.735791
FAM107B	1023.06	0	1.72553
SDCBP	887.767	0	0.712182
REXO5	32.6866	4.34E-06	0.568323
JMJD1C	1360.96	0	1.15147
EOGT	33.5521	2.92E-06	1.29996
CPEB3	33.9178	2.47E-06	1.0918
ARPP21	8713.35	0	3.37434
TBC1D4	69.5214	1.29E-13	0.67058
PACSIN3	1261.21	0	2.74423
H3F3B	2366.31	0	0.883848
SMAD1	304.131	0	0.761265
EEA1	29.282	2.04E-05	0.189965
FUCA2	51.9965	5.40E-10	0.858214
HM13	253.518	0	0.436579
LOC101747452	193.744	0	0.623799
HECTD1	156.801	0	0.363544
PSD3	64.5526	1.39E-12	0.614406
RRBP1	109.106	0	1.36868
ARFGEF1	35.5832	1.15E-06	0.221455
SPEN	29.3845	1.95E-05	0.223841
SYNCRIP	139.452	0	0.269324
GRK4	925.923	0	0.670504
BORCS8	72.0836	3.77E-14	0.411172
TCERG1	96.0019	0	0.337136
ZFC3H1	17.1343	0.00425201	0.0755389
TPT1	861.064	0	0.267429
NFKBIA	667.11	0	0.772772
CCDC50	31.0322	9.23E-06	0.494811
FYN	3305.66	0	2.00696
SMAD7	329.778	0	0.610506
LOC421106	153.859	0	0.564526
SEMA3A	20.6563	0.00094056	0.457732
MAP3K13	30.4618	1.20E-05	0.839121
SREK1	217.906	0	0.342403
APMAP	15.9866	0.00688233	0.43357
TRMT13	101.595	0	0.907055
DOT1L	348.179	0	0.727136
MICU1	20.5292	0.000993858	1.01
PHTF2	290.81	0	0.56705
APOOL	103.348	0	0.827566
GAS7	133.625	0	0.643531
SPON1	19.062	0.00187169	0.489155
ITGA9	59.5415	1.51E-11	0.787431
CCNG2	391.972	0	1.16025
TULP4	22.5051	0.000419604	0.571928
OPRM1	86.5846	0	1.52829
WASL	30.0032	1.47E-05	0.190989
TULP3	35.0029	1.50E-06	0.371222
KDELR2	98.3742	0	0.359381
ETNK1	98.7419	0	0.743107
PLXNA1	332.301	0	1.80883
AK8	133.487	0	1.11082
GHR	25.662	0.000103761	0.539781
NECTIN3	90.3277	0	1.14604
SETX	53.5744	2.56E-10	0.545406
SMAD3	287.819	0	0.53607
ATP8A1	52.1744	4.97E-10	0.389497
RB1CC1	98.4313	0	0.570028
JUN	4671.74	0	1.98812
TSPAN4	483.145	0	0.513498
ITGAV	186.02	0	0.42518
MAMLD1	411.911	0	0.573969
ZNF318	126.522	0	0.824647
NIFK	94.1208	0	0.268255
PA2G4	309.513	0	0.569505
ATP5F1AZ	197.303	0	0.292745
MAP3K20	60.9616	7.69E-12	1.02151
DPH6	52.9349	3.47E-10	0.515427
TEX2	36.8381	6.45E-07	0.479204
SLC8B1	360.527	0	1.52529
MED9	103.155	0	0.430929
ZCCHC2	71.9249	4.07E-14	0.366481
PICALM	217.476	0	0.644618
RPS2	1134.12	0	0.317342
TAF15	22.0222	0.000518527	0.449892
STXBP5	423.984	0	0.668752
NCK1	119.449	0	0.561872
RAB6A	83.0936	2.22E-16	0.350536
PTPRB	63.7545	2.03E-12	1.08741
MAP3K14	39.0656	2.30E-07	0.252481
ECPAS	225.245	0	1.19255
DIP2A	169.215	0	0.589648
NUP85	28.496	2.91E-05	0.309366
AP4E1	17.5032	0.003638	0.523159
SRSF3	18.6137	0.00226794	0.265503
USP34	71.7825	4.36E-14	0.239731
SELE	33.7191	2.71E-06	1.74282
ZMYND11	199.929	0	0.679461
ANK2	57.7216	3.59E-11	1.11298
RPLP2	324.486	0	0.205357
TRAPPC2	28.2533	3.25E-05	0.296267
MYO1B	618.175	0	1.7895
TMEM123	1139.83	0	1.19385
PPP1R12A	64.5898	1.36E-12	0.126382
NFIA	37.171	5.53E-07	1.39123
CCN2	28.4785	2.93E-05	2.71913
ZFP36L2	435.28	0	0.578695
ZNF280D	228.524	0	0.725585
LY96	101.345	0	0.550579
AFF2	285.632	0	0.269485
KLHL11	20.4852	0.00101299	0.539147
CHID1	117.051	0	0.805272
CPEB2	436.691	0	0.715193
SH3RF3	447.142	0	1.48172
LOC107052740	639.851	0	1.27193
KDM3A	29.126	2.19E-05	0.354237
SERINC5	82.3869	2.22E-16	1.38308
PI4K2B	44.5172	1.82E-08	0.6512
CCSER1	39.7333	1.69E-07	0.316194
ASNSD1	44.0594	2.25E-08	0.535243
PCNT	546.728	0	1.37212
SH3D19	65.1213	1.06E-12	0.77145
KAT7	62.1366	4.39E-12	0.512611
NRXN3	20.1634	0.0011645	0.231483
B4GALT7	19.8489	0.00133402	0.329528
SRSF2	161.984	0	0.192667
SYN3	39.2243	2.14E-07	0.768392
MSANTD4	53.0272	3.32E-10	0.409685
RASGEF1A	509.216	0	0.711289
TMEM106B	73.8324	1.63E-14	0.249651
SMPD3	94.4606	0	1.05377
TXNL4A	15.2785	0.00923633	0.430257
CSDE1	159.341	0	0.244954
ANXA5	1780.5	0	2.33572
TRIP12	74.2099	1.35E-14	0.291654
SERF2	397.269	0	0.209207
NDUFB11	95.1586	0	0.464392
SPAST	71.8186	4.29E-14	0.798538
LNPEP	73.968	1.53E-14	0.264902
CEP162	56.8355	5.47E-11	0.482721
ND1	1176.13	0	0.16295
VAV3	200.835	0	0.299849
CLGN	5101.86	0	3.08876
HDAC1	289.919	0	0.512058
DUSP23	161.332	0	0.790347
YAP1	71.6716	4.60E-14	0.516424
ZNF407	74.4637	1.20E-14	0.341167
VWA8	56.9824	5.10E-11	0.488819
RPL29	313.524	0	0.211236
YTHDC1	53.3778	2.81E-10	0.317219
ALDH7A1	101.756	0	0.373667
PRKCI	228.904	0	1.09001
IKBKE	43.0964	3.53E-08	0.320531
HDAC4	24.5381	0.000171057	0.194712
IFNGR1	1134.27	0	0.702726
TOX	370.872	0	1.28996
MGP	184.206	0	2.35164
PCM1	46.7761	6.31E-09	0.479612
TIMM10	81.2409	4.44E-16	0.332542
GLS2	1146.67	0	0.637681
ARPC1A	27.2332	5.14E-05	0.37388
ULK2	90.3321	0	0.883298
BCLAF1	15.2002	0.00954027	0.33311
FKBP3	161.221	0	0.247644
LLGL2	112.889	0	0.824687
HSPA8	3862.08	0	0.89474
PIAS1	422.94	0	0.36581
PIP4K2A	262.922	0	0.239085
TGFBR3	74.8266	1.01E-14	1.484
MAP3K5	2747.3	0	2.12414
SEPSECS	18.6059	0.0022755	0.63614
GNPTAB	418.962	0	0.715002
TTC7A	125.033	0	0.536923
ST13P5	203.441	0	0.310434
LOC107055472	317.128	0	0.720311
UBB	602.158	0	0.331216
LOC121111713	28.9131	2.41E-05	0.337465
LOC101749597	24.066	0.000210865	1.60473
LOC121107648	21.7761	0.000577467	0.435326
LEO1	18.0496	0.0028849	0.373835
LOC419404	16.3322	0.00595684	0.370533
VDAC2	629.829	0	0.644041
BTBD11	1932.74	0	2.85952
PPWD1	19.1611	0.00179373	0.462514
LONP2	15.9785	0.00690578	0.1976
NFKB1	1233.4	0	0.599155
NRIP1	713.449	0	0.406689
CALCRL	74.5878	1.13E-14	1.31983
ARID5B	1510.23	0	0.681703
OSBPL1A	669.901	0	0.989221
PON1	22.396	0.000440177	2.88769
CACYBP	241.869	0	0.56427
PPM1F	39.841	1.61E-07	0.836188
DHRS7	323.935	0	0.834505
CDCP1	40.1931	1.37E-07	0.493358
HBEGF	110.718	0	0.659447
TIA1	314.769	0	0.817086
LOC770141	81.9396	3.33E-16	0.755908
SERPINE2	315.442	0	0.979956
PNPLA3	182.839	0	1.55306
APPL2	103.355	0	0.55364
UBE2D2	65.185	1.03E-12	0.430106
RBM33	48.3028	3.08E-09	0.406269
EIF4B	116.667	0	0.36014
PTPRK	576.536	0	1.55142
SRSF5A	170.417	0	0.238017
HTATSF1	32.3051	5.17E-06	0.189696
PPP1R9A	567.125	0	1.2182
LOC107052835	18.8709	0.00203149	0.606649
LOC415780	35.667	1.11E-06	0.421011
LCP2	1130.02	0	0.454789
FAM184A	85.5838	1.11E-16	1.31499
FNBP1L	47.7536	3.99E-09	0.530156
LOC112532318	33.0227	3.72E-06	0.489758
VGLL4	205.793	0	1.2395
PHTF1	19.2277	0.00174312	0.349554
MAP7	107.567	0	0.957007
REXO1	971.309	0	1.44663
ARID1B	172.745	0	0.326507
CCAR1	29.0589	2.26E-05	0.279989
GREB1L	142.162	0	0.79281
ACTA2	257.158	0	0.992958
SESN1	331.521	0	0.636179
TMEM167A	597.446	0	1.10691
PARD3	19.0867	0.00185193	0.418171
CAPRIN1	108.558	0	0.221727
GMDS	29.8104	1.61E-05	0.246375
PSMD6	87.0165	0	0.30052
ECHDC2	50.3155	1.19E-09	0.814304
INPP4A	21.9059	0.000545603	0.218394
TENM2	40.5087	1.18E-07	0.454995
ZEB1	113.094	0	0.40017
NCOA7	22.5672	0.000408314	0.326736
PRKACB	291.668	0	1.11267
VIM	3010.16	0	1.20603
LOC107051710	22.1189	0.000497037	1.17008
DENND1B	241.699	0	0.410395
HEATR5A	44.1463	2.16E-08	0.47811
SRSF7L	107.848	0	0.161089
PITHD1	41.8781	6.23E-08	0.567674
DDX3X	1752.38	0	0.645106
ZMYND8	219.026	0	0.625573
GPC1	494.065	0	0.937891
NCL	600.54	0	0.283002
LIFR	23.967	0.000220308	0.59873
PKP4	120.583	0	1.0023
PFDN1	126.252	0	0.183959
KLHL32	16.6997	0.00510592	0.527417
SRP68	70.259	9.05E-14	0.361627
PDGFB	25.2493	0.000124709	0.650164
MORC4	68.2797	2.34E-13	0.332294
PLSCR1	1541.02	0	1.83695
LOC107051846	25.9656	9.06E-05	0.406603
PHF2	112.602	0	0.669837
SGK1	84.1477	1.11E-16	0.674242
DENND4A	92.4815	0	0.3794
RAF1	68.8359	1.79E-13	0.473215
CPSF6	45.4393	1.18E-08	0.238906
KCTD10	103.076	0	0.787693
KDM4B	124.748	0	0.527713
ST3GAL5	1032.29	0	1.29216
HOPX	197.371	0	0.511622
LYPD1	20.8509	0.000864329	2.33399
TMC1	28.345	3.12E-05	0.954261
PTPN1	102.872	0	0.616111
CDYL2	141.178	0	0.344459
WBP2	40.823	1.02E-07	0.305121
MGEA5	73.5115	1.90E-14	0.49938
PIGY	106.027	0	0.593993
TTLL7	368.248	0	1.80339
LOC772071	240.667	0	0.310828
TMEM39A	53.7783	2.33E-10	0.343065
CORO7	222.412	0	0.765822
TIMMDC1	39.0355	2.34E-07	0.217861
TXNRD3	23.8458	0.000232439	0.470873
SRRM1	50.5945	1.05E-09	0.390581
HIST1H101	2802.09	0	2.22675
PPP2R5A	124.611	0	0.675726
YPEL1	118.17	0	0.727551
LOC121110758	31.0453	9.18E-06	0.695265
CD99	98.7101	0	0.960446
RALGPS1	356.788	0	1.40437
ZADH2	125.509	0	0.794241
RALBP1	85.5343	1.11E-16	0.535242
SYNJ2BP	35.5111	1.19E-06	0.842424
ARRDC4	623.422	0	0.912387
LOC101748756	46.3016	7.88E-09	1.37282
PHIP	126.647	0	0.62399
MICU3	15.9954	0.00685718	0.996989
TMOD3	362.702	0	0.432623
CENPC	402.382	0	0.894614
LOC107053374	25.8175	9.68E-05	0.339618
ABI2	16.9552	0.00458557	0.399567
NFYC	24.1896	0.00019963	0.233132
KPNB1	201.651	0	0.542538
LPIN2	324.799	0	1.20973
YTHDC2	69.4999	1.30E-13	0.526908
DYNC1H1	76.1303	5.44E-15	0.334861
SF3B3	34.4989	1.89E-06	0.148825
KIF1B	16.3913	0.00581143	0.303603
HLF	157.596	0	2.03357
MED28	21.3526	0.000694753	0.123943
PPP1CB	762.735	0	0.712893
RNF111	21.2147	0.000737769	0.202485
AKT3	48.2117	3.22E-09	0.819269
MCPH1	26.6701	6.61E-05	0.54384
LSG1	32.6177	4.48E-06	0.267524
RIOK1	18.4053	0.00247908	0.218782
MAP7D1	46.0022	9.07E-09	1.08163
RIMS1	42.9378	3.80E-08	0.822008
DNAH7	47.5456	4.40E-09	0.682291
ZC3H8	452.724	0	1.37702
RERE	422.218	0	1.37716
PKN2	1126.61	0	0.553984
HOXA5	570.566	0	3.15087
COPE	71.2247	5.70E-14	0.228916
REEP5	350.235	0	0.83611
KIF6	22.9262	0.00034871	0.51874
NAB1	324.859	0	0.507972
SF3A1	25.1212	0.000132025	0.563734
LOC107056831	42.2636	5.21E-08	0.817114
TRERF1	362.068	0	0.952137
ITGB1	738.813	0	0.773382
BICD1	43.4783	2.96E-08	1.09913
LOC121106708	162.998	0	1.68238
DUSP11RC1I	23.4342	0.00027878	0.30141
WDR1	302.965	0	0.699602
BCL11B	979.917	0	0.625295
DBI	205.693	0	0.260186
RBM17	480.569	0	0.607702
SELENOS	203.413	0	0.233278
POLA1	37.9425	3.87E-07	0.428547
C2H6orf52	54.8949	1.37E-10	0.1834
STAG2	121.197	0	0.193214
C16orf52	27.8183	3.95E-05	0.382868
CBLL1	58.4253	2.57E-11	0.272148
ELL	1525.92	0	0.81904
ATP5PB	201.473	0	0.275319
NDFIP1	205.124	0	0.292157
XPA	112.538	0	0.205271
CEP89	35.2584	1.34E-06	0.886844
LRSAM1	38.4753	3.03E-07	0.379887
TMLHE	20.9862	0.000814937	0.331353
ATP11A	62.4395	3.80E-12	0.867169
FBN1	23.0253	0.000333825	0.410261
REV3L	34.4734	1.92E-06	0.461949
VCPIP1	34.504	1.89E-06	0.208401
ERBB4	370.438	0	1.49452
CALM1	1247.48	0	0.425807
LOC427025	60.634	8.99E-12	1.39894
MINOS1	39.7942	1.64E-07	0.200506
RAB11FIP4	70.956	6.48E-14	1.093
TEX10	127.723	0	0.333563
GPATCH11	52.2493	4.80E-10	0.51974
PPIB	663.682	0	0.605151
LOC107055991	18.2125	0.0026915	1.89072
MED23	21.0815	0.000781837	0.413671
RALGAPA1	32.6436	4.43E-06	0.184811
DTD1	40.0428	1.46E-07	0.212914
MAP4	58.3062	2.72E-11	0.5308
ABI1	46.4009	7.53E-09	0.302682
NKTR	73.273	2.13E-14	0.450387
IMMP1L	37.8328	4.08E-07	0.912402
GTF2I	25.2034	0.000127279	0.326232
CLU	126.902	0	0.691296
PPP6R2	1540.4	0	1.22395
FILIP1L	18.1218	0.00279762	0.477328
AMY1A	68.1347	2.50E-13	0.914738
DOCK10	782.025	0	0.746573
KDM7A	720.612	0	0.595223
CCDC66	194.205	0	1.0139
MDM1	84.3517	1.11E-16	0.471636
MON2	141.872	0	0.755466
SKI	304.827	0	1.5332
CSRP1	115.006	0	0.684095
SLIT3	20.88	0.000853467	0.266692
CCDC92	203.366	0	0.934965
GABBR2	29.9464	1.51E-05	0.329237
SMARCA2	151.563	0	0.601483
ATAD1	229.327	0	0.729718
LRRFIP1	306.835	0	0.427555
RAD51B	49.4293	1.81E-09	0.220693
ADAMTSL3	28.4356	2.99E-05	0.914151
CPLX4	50.2551	1.23E-09	0.414347
FHOD3	28.6486	2.72E-05	0.683408
ADNP2	17.2269	0.00408891	0.641535
TRIO	97.4678	0	0.36127
SLX4	54.2643	1.85E-10	0.630728
DDX6	86.6814	0	0.241453
CPD	499.938	0	1.75552
PEAK1	23.4345	0.000278736	0.874845
CCDC169	242.85	0	1.72043
BICD2	260.513	0	0.475394
CALCR	25.5668	0.000108264	0.736795
AUTS2	40.9417	9.64E-08	0.462876
CACNA1C	23.5955	0.000259624	0.40925
CRY1	1875.94	0	1.16343
TSC2	68.8112	1.81E-13	0.893868
ST3GAL3	17.4272	0.003757	0.44214
AKAP17B	23.3934	0.000283844	0.389685
ATP6V0C	277.524	0	0.787648
PANK3	483.211	0	0.432574
CTBP1	412.863	0	0.199113
CLINT1	1177.57	0	0.743535
EVI5	37.7055	4.32E-07	0.227579
GRIP1	23.0011	0.000337401	0.69554
PDPK1	413.168	0	1.00216
KIF5B	27.7452	4.08E-05	0.383148
RCOR3	170.746	0	0.563907
PTPRVP	29.3211	2.01E-05	10.6248
NECAB1	29.2353	2.08E-05	1.64597
PCNP	23.925	0.000224436	0.313672
PABPC1	690.938	0	0.216011
LOC107052675	37.5906	4.56E-07	0.632672
ATP1A1	115.52	0	0.780416
XRCC4	3225.14	0	1.99584
REPS2	157.227	0	1.01491
PHKA2	47.5226	4.45E-09	0.905478
VTA1	19.7453	0.00139501	0.581983
RLF	159.234	0	0.390041
MEF2D	20.3102	0.00109281	0.290319
EVC	42.3707	4.96E-08	0.958731
NPC1	37.8666	4.01E-07	0.338481
MECOM	16.1745	0.00636316	0.417411
RPL7A	282.44	0	0.150995
LOC100858381	176.132	0	0.948193
NAV3	344.016	0	0.76839
EAF1	185.038	0	0.472852
FAM204A	21.3526	0.000694745	0.360286
SDC4	321.826	0	0.909458
TTC21B	37.5729	4.60E-07	0.61545
SCML2	41.9911	5.92E-08	1.96443
RUNX2	1066.11	0	2.88765
TOB2	149.64	0	1.1318
GABARAPL1	59.5122	1.53E-11	0.782302
OPTN	89.4056	0	0.278194
FAM98A	40.7679	1.05E-07	0.407736
SH3BGRL3	1872.74	0	0.463733
EPHA6	21.4753	0.000658537	0.269858
IQGAP3	286.995	0	0.471356
RAB4A	86.0091	0	0.385115
PSMC1	45.9424	9.33E-09	0.160883
EML1	15.7637	0.00755203	0.502393
XPOT	108.975	0	0.295967
HNRNPA1	917.962	0	0.480165
TANC1	171.926	0	0.685445
CENPU	18.1143	0.0028065	1.20884
CHD9	17.5577	0.00355497	0.305362
MDGA2	44.4432	1.88E-08	1.69598
FGD4	147.974	0	1.79376
ITGB1BP1	55.4808	1.04E-10	0.60612
MANBA	219.764	0	0.339847
RSL1D1	105	0	0.562908
ARHGAP12	134.436	0	1.20446
ASRGL1	32.0114	5.91E-06	1.03868
TFPI2	29.6435	1.73E-05	5.1195
POU6F2	28.5098	2.89E-05	0.732834
HDAC9	199.82	0	0.467622
PLCB4	38.7267	2.70E-07	0.939906
GPR158	43.961	2.36E-08	0.729936
MIGA2	25.3654	0.000118428	0.469295
SEC61B	166.97	0	0.224725
EEF2	180.454	0	0.0968029
TMA7	62.6108	3.50E-12	0.129702
SLC26A8	56.0705	7.86E-11	1.23454
VPS4B	82.5031	2.22E-16	0.25483
CMIP	1512.33	0	0.561202
ERCC6L2	52.3696	4.53E-10	0.400914
MAP2K1	586.996	0	0.80163
MTFR1L	19.8716	0.001321	0.298004
INSR	268.269	0	1.43665
EEF1B2	516.986	0	0.24318
SLIT2	17.3121	0.00394436	0.423254
TLE4	600.66	0	1.80696
TBC1D30	59.0466	1.91E-11	0.819197
SNX4	136.796	0	0.967444
SDE2	187.409	0	0.312683
TMEM14A	67.94	2.75E-13	0.562598
ARNTL	1225.9	0	1.1873
SKIL	143.592	0	0.348609
NUMB	105.741	0	0.492391
LOC107053920	947.275	0	1.39685
SYNE3	171.481	0	0.897301
CLEC3B	21.717	0.000592576	3.51965
MBNL3	236.534	0	0.314829
HNRNPD	84.0614	1.11E-16	0.195194
EEF1D	398.5	0	0.136518
ANO4	30.9892	9.41E-06	0.560336
RBFOX2	99.9642	0	0.769285
NR3C2	60.6219	9.04E-12	0.77941
FBN2	22.3532	0.000448535	0.859077
TNX	16.4356	0.00570438	1.49516
LOC101749809	2840.2	0	2.57824
IL20RA	5640.02	0	2.93728
MBTPS1	24.4551	0.00017747	0.375535
LOC420374	62.0358	4.61E-12	0.406151
LRRC28	20.9685	0.000821246	0.731759
POLDIP2	50.494	1.10E-09	0.369017
EHMT1	168.587	0	0.423921
ATP13A3	31.6681	6.91E-06	0.29649
KCTD1	30.0195	1.46E-05	0.45315
RAD21	177.788	0	0.426799
INTS6L	63.3419	2.47E-12	0.401564
RRAGD	65.6439	8.24E-13	0.632562
ACTN1	168.648	0	0.248615
NUDC	18.6115	0.00227002	0.297552
PMEPA1	166.81	0	0.692177
ANXA2	379.388	0	0.927875
PPP1R36	2013.58	0	0.683645
USP3	459.665	0	0.724346
FAR2	19.3267	0.0016705	0.243691
LOC420992	16.5663	0.00540028	0.227671
STARD3NL	22.2034	0.000478964	0.463121
LOC107049847	617.267	0	1.67148
CLK4	43.9269	2.40E-08	0.420735
ZNF606	59.7942	1.34E-11	0.43348
TPM3	712.566	0	0.658418
L3MBTL3	127.939	0	1.12404
NAA16	114.435	0	0.710075
ACY1	39.1912	2.17E-07	0.424595
KLF7	50.6048	1.04E-09	0.35478
XYLT1	27.9036	3.80E-05	0.210266
KDM4C	75.7148	6.55E-15	0.540409
FAM155A	28.2979	3.18E-05	0.320999
ZC3H13	31.2063	8.53E-06	0.359792
FAM179B	255.464	0	0.463351
PKNOX1	18.3511	0.00253711	0.503778
OSBPL11	18.5459	0.0023346	0.228645
DYL1	63.8051	1.98E-12	0.262181
CAPZA2	251.964	0	0.442641
CALR	123.846	0	0.561698
MRPL32	42.4246	4.83E-08	0.546305
BZW1	43.5296	2.89E-08	0.297095
PEPD	16.4251	0.00572962	0.198044
ACADS	21.313	0.000706851	0.65718
LOC100859737	887.505	0	0.37035
CLIP1	115.648	0	0.377742
DAAM1	30.3125	1.28E-05	1.12867
ATRNL1	37.3448	5.11E-07	0.416216
SEC62	42.8738	3.92E-08	0.188445
SLC37A3	27.777	4.02E-05	0.249132
VAMP7	84.6036	1.11E-16	0.459286
PRPF38B	77.5168	2.78E-15	0.209114
ND5	413.769	0	0.119209
LOC776275	249.85	0	1.23238
CCDC171	55.7299	9.24E-11	0.30233
MID1	22.451	0.000429689	0.410732
LOC121111543	25.9905	8.96E-05	0.65825
SGMS2	177.314	0	0.945116
RTN4	128.299	0	0.515514
SNRNP48	23.0024	0.000337215	0.555041
LZTFL1	222.212	0	0.641855
ELL2	356.061	0	0.659532
LOC107054808	35.5091	1.19E-06	0.604046
LOC101750640	28.3324	3.13E-05	0.470168
NOTCH1	527.125	0	1.12634
MAD1L1	44.3044	2.01E-08	0.283468
LEKR1	25.7797	9.85E-05	0.872175
FCHO2	406.872	0	0.468455
PARP4	91.673	0	0.225812
TGS1	15.353	0.00895584	0.331752
MYCN	184.984	0	0.659128
KLHL24	108.35	0	0.618508
ABCC5	62.5143	3.67E-12	0.279385
PPIL3	34.1962	2.18E-06	0.615147
RPSAP58	460.407	0	0.169144
USP6NL	92.0911	0	0.505204
BCL7A	131.721	0	0.701861
AFTPH	73.9566	1.53E-14	0.258265
RGS4	271.402	0	0.381781
MRPS7	15.7067	0.0077334	0.327081
RPL36A	596.525	0	0.315226
DAB2IP	18.9622	0.00195353	0.343138
ALS2	409.321	0	0.978022
SRSF5	38.501	2.99E-07	0.377398
LONRF3	1180.99	0	2.36235
NDUFB2	46.9899	5.71E-09	0.0875651
SUSD3	735.205	0	0.470273
USP45	82.0298	3.33E-16	0.437103
TRPM1	21.318	0.000705306	0.512428
UBA6	49.5598	1.71E-09	0.392237
CHCHD10	389.542	0	0.457673
ZNRF1	87.2687	0	0.334744
ARID4A	97.7022	0	0.20129
TENM4	32.902	3.94E-06	0.733398
ADIPOR2	347.006	0	0.519769
MDFIC	202.673	0	1.22387
CD81	299.669	0	0.468256
CKLF	119.155	0	0.77365
NELL1	22.4322	0.000433242	0.68888
PCCB	41.078	9.05E-08	0.352644
PHKA1	61.9945	4.70E-12	0.596724
DOPEY2	207.551	0	0.561563
RNF149	397.975	0	0.76088
SH3KBP1	383.687	0	0.583268
RILPL1	422.716	0	0.680067
UPF1	339.064	0	0.526471
ABCC3	202.33	0	0.662262
RAP1GAP3	30.4959	1.18E-05	0.646547
RPS6KA3	146.134	0	0.210145
DNAJC18	22.7008	0.000385044	0.372626
AKAP8	122.174	0	0.731274
EFL1	312.421	0	1.32541
METRNL	846.842	0	0.813915
LOC107054741	38.2564	3.35E-07	0.445097
TNRC6A	30.5347	1.16E-05	0.265499
OSBPL9	63.3742	2.44E-12	0.326787
GTDC1	124.911	0	0.276503
TMEM131L	115.912	0	0.296325
GTF2A2	32.4311	4.88E-06	0.255676
TOMM20	176.347	0	0.168546
BIN1	255.38	0	1.21018
BLOC1S3	68.7014	1.91E-13	0.785935
DDOST	19.9183	0.00129462	0.314567
CSMD3	25.8683	9.46E-05	0.352225
NDUFV1	24.7748	0.000153999	0.278551
MFGE8	84.1733	1.11E-16	3.26519
NOL9	459.476	0	0.286748
PDRG1	60.4386	9.86E-12	0.316885
TUSC1	41.2573	8.32E-08	0.782253
EML5	57.3705	4.24E-11	0.624282
MRS2	31.9418	6.10E-06	0.396065
ERG	43.7573	2.59E-08	0.606851
UQCRQ	178.069	0	0.228888
SEMA3C	134.114	0	0.736412
LMNB1	36.9183	6.22E-07	0.880264
NHS	95.8974	0	0.651594
CDC73	50.2292	1.24E-09	0.347435
UBTD2	68.0008	2.67E-13	1.0895
LOC107051642	19.3878	0.00162723	0.456257
LOC121113415	1663.29	0	1.84992
PDCD6IP	87.2303	0	0.666259
RPS11	926.306	0	0.222403
CELF4	55.7214	9.27E-11	0.461633
EPB41L4A	25.6922	0.000102373	0.658904
TUBB6	25.7146	0.000101359	1.25153
C4BPG	91.4394	0	0.447924
DAZAP1	168.523	0	0.233246
KIFAP3	28.9388	2.38E-05	1.0024
GPR107	19.6806	0.00143442	0.170355
AACS	28.7044	2.65E-05	0.774741
APP	181.788	0	1.07141
N4BP2	146.633	0	0.643451
AMOT	180.577	0	1.81243
EIF3A	42.4516	4.77E-08	0.106914
PLS3	58.5078	2.47E-11	1.42486
PPP2R5E	35.3758	1.27E-06	0.324054
SH3GLB1	81.8042	3.33E-16	0.469181
EZH2	165.507	0	0.403714
CRNKL1	29.4983	1.85E-05	0.188835
RAB30	36.977	6.05E-07	0.943766
ZNF618	71.0688	6.14E-14	0.575209
SMYD2	40.1574	1.39E-07	1.09063
SEC31A	70.1595	9.49E-14	0.475709
DUSP3	21.9798	0.00052824	0.906903
LARP1	137.901	0	0.274413
CHMP3	80.2754	7.77E-16	0.317853
SPPL3	22.7464	0.000377398	0.413027
DOK6	645.257	0	1.33422
VCL	152.682	0	0.987879
EIF3I	123.3	0	0.229361
TIRAP	52.0617	5.24E-10	0.509106
SHTN1	19.1917	0.00177035	0.978256
IPO7	309.403	0	0.35463
LOC121111353	41.205	8.53E-08	0.921362
COMMD4	26.0247	8.83E-05	0.495724
VPS26A	286.356	0	0.470885
CD47	1382.53	0	0.52622
SKA2P1	99.9764	0	0.608
PGS1	104.834	0	1.11801
RPS3A	303.917	0	0.11193
LOC124417285	43.2296	3.32E-08	0.917272
CCDC51	44.3263	1.99E-08	0.707098
KIF16B	35.0624	1.46E-06	0.229713
LOC768772	21.8321	0.000563515	1.30263
LOC107049468	1890.33	0	1.96395
DST	116.081	0	0.899172
LOC421515	20.2476	0.0011228	1.24022
MED12	140.564	0	0.438375
IL1RAPL1	34.4742	1.92E-06	0.394205
PTPRJ	60.5041	9.56E-12	1.49397
GALNT9	33.0351	3.70E-06	0.60693
ANO5	717.257	0	0.577878
CDH18	20.9992	0.000810351	0.446457
THRB	20.7877	0.000888377	1.21352
LOC121108831	56.1508	7.57E-11	7.16782
POR	66.0078	6.92E-13	0.735088
LRRFIP2	905.291	0	0.630987
RNASET2	449.648	0	1.19178
GPC4	21.0351	0.000797784	1.07676
IL1RAP	29.0526	2.26E-05	0.277708
NR2F2	19.3082	0.00168388	3.36479
RPS6KA2	178.51	0	0.803589
EIF2AK3	1088.34	0	1.35281
RPL27A	263.638	0	0.120728
DENND1A	19.4917	0.00155604	0.294667
UBE2D1	33.5058	2.99E-06	0.316442
CRYBG3	66.6649	5.06E-13	0.388832
CYFIP1	481.707	0	0.887616
NUP98	22.8097	0.000367046	0.156055
ST6GAL2	21.4052	0.000679001	1.02154
PUM1	257.053	0	0.316903
RPL10A	340.054	0	0.137206
TM9SF3	203.232	0	0.312762
ICA1	55.5898	9.87E-11	0.87543
SPCS1	60.287	1.06E-11	0.210292
HMGXB3	22.044	0.00051361	0.267895
EIF4A3	60.2325	1.09E-11	0.28481
ETFA	37.1381	5.62E-07	0.608385
PPP4R3A	25.3296	0.000120328	0.183729
SETD5	89.9692	0	0.452069
INPP4B	302.036	0	1.14562
ARL4A	30.4803	1.19E-05	0.200745
MIPEP	22.2792	0.000463321	0.238088
RNF219	118.049	0	0.913478
TXNRD1	106.484	0	1.16595
KMT2A	32.6385	4.44E-06	0.25877
NAPEPLD	308.715	0	0.731611
SLC39A6	46.8414	6.12E-09	0.19946
ELF1	1263.86	0	0.333979
HMG20B	35.8488	1.02E-06	0.396298
LOC121111249	93.0868	0	0.676009
AIFM1	16.1212	0.00650638	0.345758
HTRA1	65.6482	8.22E-13	1.0075
RIC8B	16.0538	0.0066922	0.143992
P4HB	94.4023	0	0.254283
ADD3	425.808	0	0.478335
PIK3C3	19.9171	0.00129529	0.220121
KDM6A	96.8715	0	0.462047
DCAF5	16.9924	0.00451415	0.346918
CPAMD8	161.697	0	1.98686
IDH3A	69.2323	1.48E-13	0.493525
WDR86	43.1759	3.40E-08	1.40016
EEFSEC	45.3671	1.22E-08	0.511873
UBQLN1	131.512	0	1.25425
COX7A2	135.591	0	0.296465
USO1	81.6628	3.33E-16	0.288913
PLCL1	117.387	0	0.623622
SRBD1	24.5564	0.000169677	0.336346
TMSB4X	5108.73	0	0.655738
AMFR	321.883	0	0.451344
MGST1	83.2282	2.22E-16	0.437411
SGK3	160.394	0	0.474631
ACAT1	43.0582	3.60E-08	0.231463
LSP1P1	921.659	0	1.00044
VAPB	41.1139	8.90E-08	0.191187
LOC776816	414.337	0	0.363521
GPATCH2	24.5399	0.000170924	0.253947
RAB39B	1762.19	0	1.2353
ZDHHC6	27.2453	5.11E-05	0.365669
PPIA	449.736	0	0.209064
LOC107052897	278.656	0	2.13861
SCAI	34.9339	1.55E-06	0.431349
CD38	136.748	0	2.22056
CECR2	17.9215	0.00304643	0.59821
TCF4	108.106	0	1.0577
RALGAPA2	51.5698	6.61E-10	0.40757
RPL22	376.321	0	0.171504
SEPTIN8	24.8794	0.000147007	0.631789
MAPK4	131.264	0	0.492273
LOC770612	1356.23	0	0.532008
SGCZ	25.2398	0.000125238	0.455874
INPP5A	550.065	0	1.49557
EGFR	26.3826	7.52E-05	0.551872
TRNAU1AP	251.892	0	1.26356
LOC428417	95.4825	0	0.56523
TK2	28.5078	2.90E-05	0.731406
CDK5RAP2	125.098	0	0.458382
PSMA6	123.397	0	0.321846
CHFR	36.5351	7.42E-07	0.817051
GCDH	48.4062	2.93E-09	0.683689
LOC107052389	178.101	0	0.484935
MSRA	33.3751	3.17E-06	0.389343
TMEM259	40.5164	1.17E-07	0.281025
CEP192	52.0634	5.24E-10	1.31572
MOB1B	22.6518	0.000393416	0.43919
GALNT18	352.629	0	0.658494
CAMSAP2	139.634	0	0.339894
H1FX	2674.58	0	1.58109
HTT	60.0782	1.17E-11	0.301155
USP40	33.4946	3.00E-06	0.402944
SELENOW	209.06	0	0.556616
CEP170	31.8303	6.42E-06	0.382649
COPB2	47.9673	3.61E-09	0.203536
RPL17	423.871	0	0.146981
TNFSF10	69.2415	1.47E-13	1.32869
GTF2F2	30.6779	1.08E-05	0.180392
KIAA1841	382.811	0	0.694786
MOSPD2	33.5699	2.90E-06	0.400255
COMMD7	82.1449	3.33E-16	0.430092
NFATC2	549.792	0	1.21677
ZFPM1	225.206	0	0.786651
TRA2B	41.3056	8.14E-08	0.467728
C1orf198	40.4915	1.19E-07	1.55705
SMARCA5	131.645	0	0.502365
STK25	274.827	0	1.10538
EIF3B	75.2754	8.10E-15	0.22267
SSBP2	2775.2	0	2.30904
LOC107049008	41.978	5.95E-08	0.472232
TACC3	144.689	0	0.520839
SCAMP2	38.6381	2.81E-07	0.332972
SMCHD1	55.841	8.76E-11	0.205158
ADGRB3	40.5848	1.14E-07	0.456967
TIAM1	525.352	0	1.84114
LOC101749155	21.8144	0.000567874	0.818727
RPS17	1448.83	0	0.482683
IFFO2	48.0789	3.42E-09	0.733802
RPL14	431.821	0	0.201776
ABHD6	82.4441	2.22E-16	2.63537
RPL30	347.223	0	0.162191
NTL	16.2525	0.00615902	1.36853
NDEL1	99.3155	0	0.31824
VPS39	24.6867	0.000160143	0.397684
IL18	1045.56	0	1.9781
LOC121109066	263.767	0	0.975401
PCMTD1	22.9815	0.00034032	0.207048
DFNB59	417.777	0	2.38735
STK11IP	25.4557	0.000113757	0.36478
ZMAT5	26.1653	8.29E-05	0.614445
[truncated: 7,275 more rows]
