# Supplementary material for: Cross-species comparison of single-cell landscapes reveals conservation and innovation in chicken immune systems
Source: Research Square preprint supplement (doi:10.21203/rs.3.rs-6164369/v1), 2025-03-20
Supplement: Supplementary file 8 [file d2ed91ea8edf2dd883acfdf2.xlsx]

## Sheet: Sheet
Supplementary Table2: A list of marker genes and corresponding references for the annotation of turtle cell types.
Tissue	Cell type_new	Marker gene	Reference
Esophagus	Cilated cell	RSPH1,CFAP20	PMID: 34871179;36329026
	Endothelial cell	VWF,LYVE1,AQP1	PMID: 36198871;32059779
	Epithelial cell	EPCAM,MUC5AC	PMID:35750885;30097657
	Fibroblast	COL1A2,DCN ,COL3A1 ,COL1A1,POSTN	PMID:33741943;
	DC1	FLT3; IRF8	PMID: 36685557;32686767
	Macrophage	C1QB,C1QA	PMID: 33741943; 31892341
	Activated B	KLF2,PAX5	PMID: 37646019;33352111
	Cycling_B	MKI67,TOP2A,PAX5	PMID:35310332; 33352111
	Plasma cells	JCHAIN,MZB1	PMID: 35090788;34385315
	Treg	CD3E,CD4,CTLA4,TNFRSF18	PMID: 35549406;30479382
	NK1	CD3E,LOC117878371(-),IL2RB,LOC117872867	PMID: 35549406;22072559
	NK2	CD3E,LOC117878371(-),GZMA,LOC117872867	PMID: 35549406;37620327
	Cycling T/NK	MKI67,TOP2A,CD3E,CD4,LOC117872867	PMID: 35310332; 35549406
	ILC	CD3Elow,CD4(-),IL23R	PMID: 35896601
Heart	Cardiomyocyte	TTN,TNNC1	PMID: 36575170; 39152369
	Endothelial cell	PDPN,CDH5	PMID: 32059779;36198871
	Epithelial cell	KRT18,KRT8,EPCAM	PMID: 35608199;34719766;35750885
	Fibroblast	DCN ,COL3A1 ,COL1A1,POSTN	PMID:33741943;
	Basophil	HDC,GATA2,KIT(-)	PMID: 27135604
	Cardiomyocyte	TTN,TNNC1	PMID: 36575170; 39152369
	Neuron	NRXN3	PMID: 34879268
	Basophil	HDC,GATA2,KIT(-)	PMID: 27135604
	Platelet	GP9	PMID: 37063767
	Schwann cell	SOX10,CDH19	PMID: 20457761;33382200
	Macrophage	CSF1R,C1QB,C1QA	PMID: 33741943; 31892341
	Macrophage	CSF1R,C1QB,C1QA	PMID: 33741943; 31892341
	Naive CD4+ T	CD3E,CD4,TCF7,CCR7,KLF2	PMID: 35549406; 30479382;37646019
	Treg	CD3E,CD4,CTLA4,TNFRSF18	PMID: 35549406;30479382
	Gammadelta T	CD3E,CD4(-),CD8(-),LOC117885462,LOC117873302,LOC117869107,LOC117871722	PMID: 35549406
	NK1	CD3E,LOC117878371(-),IL2RB,LOC117872867	PMID: 35549406;22072559
	NK2	CD3E,LOC117878371(-),GZMA,LOC117872867	PMID: 35549406;37620327
	Cycling NK	MKI67,TOP2A,CD3E,LOC117878371(-),GZMA,LOC117872867	PMID:35310332;35549406;37620327
	ILC	CD3Elow,CD4(-),IL23R	PMID: 35896601
Intestine	Endothelial cell	VWF,LYVE1,AQP1	PMID: 36198871;32059779;
	Enterocyte	EPCAM,FABP1,AQP8,SI	PMID: 35750885;39273007;29802404;29802404
	Fibroblast	DCN ,COL3A1 ,COL1A1	PMID:33741943;
	Goblet cell	MUC2,EPCAM,AGR2	PMID: 30097657; 35750885;35511361
	Unknow	CKB,HCK
	Schwann cell	CDH19	PMID: 33382200
	DC1	FLT3; IRF8	PMID: 36685557;32686767
	Activated B	KLF2,PAX5	PMID: 37646019;33352111
	Cycling_B	MKI67,TOP2A,PAX5	PMID:35310332; 33352111
	Plasma cells	JCHAIN,MZB1	PMID: 35090788;34385315
	Naive CD4+ T	CD3E,CD4,TCF7,CCR7,KLF2	PMID: 35549406; 30479382;37646019
	Treg	CD3E,CD4,CTLA4,IL2RA,	PMID: 35549406;39392468
	Activated CD8+ T	,CD3E,LOC117878371,GZMAlow	PMID: 35549406; 37620327
	CD8+CTL	,CD3E,LOC117878371,GZMA	PMID: 35549406; 37620327
	Gammadelta T	CD3E,CD4(-),CD8(-),LOC117885462,LOC117873302,LOC117869107,LOC117871722	PMID: 35549406
	NK1	CD3E,LOC117878371(-),LOC117872867	PMID: 35549406;
	NK2	CD3E,LOC117878371(-),GZMA,LOC117872867	PMID: 35549406;37620327
	NK1	CD3E,LOC117878371(-),LOC117872867	PMID: 35549406;
	ILC	CD3Elow,CD4(-),IL23R	PMID: 35896601
	ROBO3+T	CD3E,ROBO3	PMID: 35549406
Kidney	Collecting duct intercalated cell	ATP6V1G3, ATP6V0D2,SLC26A4,SLC4A1	PMID: 29622724;
	Collecting duct principal cell	HSD11B2, SCNN1B	PMID: 29622724; PMCID: PMC9176741
	Endothelial cell	VWF,LYVE1	PMID: 32059779;36198871
	Fibroblast	DCN ,COL3A1 ,COL1A1,POSTN	PMID:33741943;
	Neutrophil	CSF3R,MMP9	PMID: 30979687;38287279
	Proximal convoluted tubules	SLC13A3,SLC1A4,SLC6A19
	Macrophage	CSF1R,C1QB,C1QA	PMID: 33741943; 31892341
	Macrophage	CSF1R,C1QB,C1QA	PMID: 33741943; 31892341
	Naive CD4+ T	CD3E,CD4,TCF7,CCR7,KLF2	PMID: 35549406; 30479382;37646019
	Gammadelta T	CD3E,CD4(-),CD8(-),LOC117885462,LOC117873302,LOC117871722	PMID: 35549406
	NK1	CD3E,LOC117878371(-),LOC117872867	PMID: 35549406;
	NK2	CD3E,LOC117878371(-),GZMA,LOC117872867	PMID: 35549406;37620327
	Cycling CD4+ T	MKI67,,CD3E,CD4	PMID: 35310332;35549406;
	ILC	CD3Elow,CD4(-),IL23R	PMID: 35896601
Liver	Cholangiocyte	SOX9,EPCAM	PMID: 30348985
	Endothelial cell	VWF,LYVE1,AQP1	PMID: 32059779;36198871
	Hepatic stellate cell	COL1A1,ACTA2	PMID: 30348985
	Hepatocyte	APOA1, APOA2	PMID: 31597962
	Endothelial cell	VWFPECAM1,AQP1	PMID: 32059779;36198871
	Basophil	HDC,GATA2,KIT(-)	PMID: 27135604
	Neutrophil	CSF3R,MMP9	PMID: 30979687;38287279
	Platelet	GP9	PMID: 37063767
	DC1	FLT3; IRF8	PMID: 36685557;32686767
	Macrophage	CSF1R,C1QB,C1QA	PMID: 33741943; 31892341
	Activated B	KLF2,PAX5	PMID: 37646019;33352111
	Naive B	KLF12,PAX5	PMID: 33352111
	Cycling B/T	MKI67,TOP2A,CD3E,PAX5( )	PMID:35310332;35549406;33352111
	Plasma cells	JCHAIN,MZB1	PMID: 35090788;34385315
	CD4+KLF12+	,CD3E,CD4,KLF12	PMID: 35549406;
	Gammadelta T	CD3E,CD4(-),CD8(-),LOC117885462,LOC117873302,LOC117869107,LOC117871722	PMID: 35549406
	NK1	CD3E,LOC117878371(-),LOC117872867	PMID: 35549406;
	NK2	CD3E,LOC117878371(-),GZMA,LOC117872867	PMID: 35549406;37620327
	Cycling T	,CD3E,LOC117878371	PMID: 35549406
	ILC	CD3Elow,CD4(-),IL23R	PMID: 35896601
Lung	Alveolar epithelial type 2 cell	EPCAM,SFTPA	PMID: 37166489
	Cilated cell	RSPH1,CFAP20	PMID: 34871179;36329026
	Endothelial cell	VWF,LYVE1,AQP1	PMID: 32059779;36198871
	Epithelial cell	KRT18,KRT8,EPCAM	PMID: 35608199;34719766;35750885
	Fibroblast	DCN ,COL3A1 ,COL1A1,POSTN	PMID:33741943;
	Goblet cell	MUC5AC,EPCAM,AGR2	PMID: 30097657; 35750885;35511361
	Ionocyte	FOXI1,CFTR	PMID: 30069044
	Neuron	NRXN1	PMID: 36646705
	Neutrophil	CSF3R,MMP9	PMID: 30979687;38287279
	Schwann cell	MPZ	PMID: 38028432
	Macrophage	CSF1R,C1QB,C1QA	PMID: 33741943; 31892341
	Macrophage	CSF1R,C1QB,C1QA	PMID: 33741943; 31892341
	Activated B	KLF2,PAX5	PMID: 37646019;33352111
	Naive CD4+ T	CD3E,CD4,TCF7,CCR7,KLF2	PMID: 35549406; 30479382;37646019
	TNFRSF1B+ CD4+ T	CD3E,CD4,TNFRSF1B	PMID: 35549406
	Gammadelta T	CD3E,CD4(-),LOC117878371(-),LOC117885462,LOC117873302,LOC117869107,LOC117871722	PMID: 35549406
	NK2	CD3E,LOC117878371(-),GZMA,LOC117872867	PMID: 35549406;37620327
	Cycling T/NK	MKI67,TOP2A,CD3E,LOC117878371,LOC117872867	PMID: 35310332; 35549406
	ILC	CD3Elow,CD4(-),IL23R	PMID: 35896601
Stomach	Parietal cell	ATP4B	PMID: 33691112
	Endocrine cell	CHGA	PMID: 38718896
	Endothelial cell	VWFPECAM1,AQP1	PMID: 32059779;36198871
	Fibroblast	DCN ,COL3A1	PMID:33741943;
	Neutrophil	CSF3R,MMP9	PMID: 30979687;38287279
	Pit cell	KRT18,MUC5AC,TFF3	PMID: 35608199;30097657
	Macrophage	CSF1R,C1QB,C1QA	PMID: 33741943; 31892341
	Naive CD4+ T	CD3E,CD4,TCF7,CCR7,KLF2	PMID: 35549406; 30479382;37646019
	Treg	CD3E,CD4,CTLA4,IL2RA,	PMID: 35549406;39392468
	Activated CD8+ T	,CD3E,LOC117878371,GZMAlow	PMID: 35549406; 37620327
	Gammadelta T	CD3E,CD4(-),LOC117878371(-),LOC117885462,LOC117873302,LOC117869107,LOC117871722	PMID: 35549406
	NK1	CD3E,LOC117878371(-),LOC117872867	PMID: 35549406;
	NK2	CD3E,LOC117878371(-),GZMA,LOC117872867	PMID: 35549406;37620327
	Cycling T/NK	MKI67,TOP2A,CD3E,LOC117878371,LOC117872867	PMID: 35549406;37620327
	ILC	CD3Elow,CD4(-),IL23R	PMID: 35549406;37620327
Testit	Endothelial cell	LYVE1,PDPN,VWF,AQP1	PMID: 32059779;36198871
	Erythroid cell	LOC117871380, LOC117884343	PMID: 35514346; 34957119
	Sertoli cell	PRDX6,CLDN11	PMID: 36544022
	Sperm	TRAF3IP1,GKAP1	PMID: 36544022
	DC1	FLT3; IRF8	PMID: 36685557;32686767
	Macrophage	CSF1R,C1QB,C1QA	PMID: 33741943; 31892341
	Treg	CD3E,CD4,CTLA4	PMID: 35549406
	Cycling T/NK	MKI67,TOP2A,CD3E,CD4,LOC117878371,LOC117872867	PMID: 35310332; 35549406
	Naive CD4+ T	CD3E,CD4,TCF7,CCR7,KLF2	PMID: 35549406; 30479382;37646019
Trachea	Cilated cell	RSPH1,CFAP20	PMID: 34871179;36329026
	Endocrine cell	CHGA	PMID: 38718896
	Endothelial cell	LYVE1,PDPN,VWF,AQP1	PMID: 32059779;36198871
	Epithelial cell	EPCAM	PMID: 35750885
	Fibroblast	DCN ,COL3A1 ,COL1A1,POSTN	PMID:33741943;
	Ionocyte	FOXI1,CFTR	PMID: 30069044
	Epithelial cell	EPCAM	PMID: 35750885
	Schwann cell	SOX10,CDH19	PMID: 20457761; 33382200
	Pericyte	MYH11,ACTA2,GUCY1A1	PMID: 35722109
	Macrophage	CSF1R,C1QB,C1QA	PMID: 33741943; 31892341
	Macrophage	CSF1R,C1QB,C1QA	PMID: 33741943; 31892341
	Plasma cells	JCHAIN,MZB1	PMID: 35090788;34385315
	Naive CD4+ T	CD3E,CD4,TCF7,CCR7,KLF2	PMID: 35549406; 30479382;37646019
	Gammadelta T	CD3E,CD4(-),LOC117878371(-),LOC117885462,LOC117873302,LOC117869107,LOC117871722	PMID: 35549406
	NK1	CD3E,LOC117878371(-),LOC117872867	PMID: 35549406;
	NK2	CD3E,LOC117878371(-),GZMA,LOC117872867	PMID: 35549406;37620327
	Cycling T	MKI67,TOP2A,,CD3E,CD4,	PMID: 35549406;37620327
	ILC	CD3Elow,CD4(-),IL23R	PMID: 35549406;37620327
Uterus	Endothelial cell	LYVE1,PDPN,VWF,AQP1	PMID: 32059779;36198871
	Epithelial cell	EPCAM	PMID: 35750885
	Fibroblast	DCN ,COL3A1 ,COL1A1,POSTN	PMID:33741943;
	Luminal cell	KRT8,KRT18,ATP6V1G3,SLC26A4	PMID: 34719766;35608199
	Macrophage	CSF1R,C1QB,C1QA	PMID: 33741943; 31892341
	Macrophage	CSF1R,C1QB,C1QA	PMID: 33741943; 31892341
	Naive CD4+ T	CD3E,CD4,TCF7,CCR7,KLF2	PMID: 35549406; 30479382;37646019
	Gammadelta T	CD3E,CD4(-),LOC117878371(-),LOC117885462,LOC117873302,LOC117869107,LOC117871722	PMID: 35549406
	NK1	CD3E,LOC117878371(-),LOC117872867	PMID: 35549406;
	NK2	CD3E,LOC117878371(-),GZMA,LOC117872867	PMID: 35549406;37620327
	ILC	CD3Elow,CD4(-),IL23R	PMID: 35549406;37620327
Skin	Cycling keratinocyte	MKI67;EPCAM,LOC117889067,LOC117869236	PMID:35310332;33238152
	Endothelial cell	LYVE1,PDPN,VWF,AQP1	PMID: 32059779;36198871
	Fibroblast	DCN ,COL3A1 ,COL1A1,POSTN	PMID:33741943;
	Keratinocyte	EPCAM,LOC117889067,LOC117869236	PMID:33238152
	Melanocyte	PMELMLANA	PMID: 39227572;37077860
	Macrophage	CSF1R,C1QB,C1QA	PMID: 33741943; 31892341
	DC1	FLT3; IRF8	PMID: 36685557;32686767
Jejunum	Endothelial cell	PDPN,VWF,AQP1	PMID: 32059779;36198871
	Enterocyte	APOA1,SI	PMID: 37488127; 29802404
	Fibroblast	DCN ,COL1A1,	PMID:33741943;
	Goblet cell	MUC2,EPCAM,MUC5AC	PMID: 30097657; 35750885;
	DC1	FLT3; IRF8	PMID: 36685557;32686767
	Macrophage	CSF1R,C1QB,C1QA	PMID: 33741943; 31892341
	Plasma cells	JCHAIN,MZB1	PMID: 35090788;34385315
	CD4+ T	,CD3E,CD4	PMID: 35549406;
	CD4+ T	,CD3E,CD4	PMID: 35549406;
	NK2	CD3E,LOC117878371(-),GZMA,LOC117872867	PMID: 35549406;37620327
	NK2	CD3E,LOC117878371(-),GZMA,LOC117872867	PMID: 35549406;37620327
	Cycling T	MKI67,TOP2A,,CD3E(PMID: 35549406)	PMID: 35549406;37620327
Pancreas	Endocrine cell	CHGA	PMID: 38718896
	Endothelial cell	VWF,AQP1,PECAM1	PMID: 32059779;36198871
	Lymphatic endothelial cell	LYVE1,PDPN	PMID: 32059779
	Pancreas acinar cell	PTF1A	PMID: 36868230
	Pancreas ductal cell	SOX9	PMID: 36868230
	Pancreatic stellate cell	COL4A1, COL4A2, COL6A3	PMID: 33212097
Spleen	Cycling T/NK	MKI67,TOP2A,CD3E,LOC117878371,LOC117872867	PMID: 35310332; 35549406
	Cycling_B	MKI67,TOP2A,PAX5	PMID:35310332; 33352111
	DC1	FLT3; IRF8	PMID: 36685557; 32686767
	Gammadelta T	CD3E,CD4(-),CD8(-),LOC117885462,LOC117873302,LOC117869107,LOC117871722	PMID: 35549406
	ILC	CD3Elow,CD4(-),IL23R	PMID: 35896601
	Naive B	KLF12,PAX5	PMID: 33352111
	Activated B	KLF2,PAX5	PMID: 37646019;33352111
	Basophil	HDC,GATA2,KIT(-)	PMID: 27135604
	Macrophage	C1QB,C1QA	PMID: 33741943; 31892341
	Naive CD4+ T	CD3E,CD4,TCF7,CCR7,KLF2	PMID: 35549406; 30479382;37646019
	Naive CD8+ T	CD3E,LOC117878371,TCF7,CCR7,KLF2	PMID: 35549406;30479382;37646019
	NK1	CD3E,LOC117878371(-),LOC117872867	PMID: 35549406;
	Plasma cells	JCHAIN,MZB1	PMID: 35090788;34385315
	Platelet	GP9	PMID: 37063767
	ROBO3+T	CD3E,ROBO3	PMID: 35549406
	Treg	CD3E,CD4,CTLA4,TNFRSF18	PMID: 35549406;30479382
