# Supplementary material for: Cross-species comparison of single-cell landscapes reveals conservation and innovation in chicken immune systems
Source: Research Square preprint supplement (doi:10.21203/rs.3.rs-6164369/v1), 2025-03-20
Supplement: Supplementary file 9 [file e7d3ca4ee8faa0e65ff6ba00.xlsx]

## Sheet: Chromaffin cell
Supplementary Table3: Upregulated genes in chicken adrenal cortex cells.
gene	p_val	avg_log2FC	pct.1	pct.2	p_val_adj
TENM2	3.79551e-83	13.0946	0.996	0	6.89264e-79
DLGAP2	8.58857e-69	11.514	0.967	0	1.55968e-64
PEX5L	8.41511e-71	11.3171	0.972	0	1.52818e-66
MYT1L	3.67249e-68	10.8898	0.965	0	6.66924e-64
AFF2	1.92528e-69	10.4529	0.968	0	3.4963e-65
PTH2R	1.78574e-55	10.339	0.915	0	3.2429e-51
ST18	3.5018e-58	10.077	0.928	0	6.35927e-54
PDE3A	1.56932e-80	10.0581	0.993	0.016	2.84988e-76
PCDH11X	1.40121e-34	9.93603	0.751	0	2.54459e-30
KCNK9	2.24838e-52	9.83848	0.898	0	4.08306e-48
TBL1X	4.12774e-55	9.82039	0.913	0	7.49598e-51
OPCML	1.78574e-55	9.56913	0.915	0	3.2429e-51
ARHGAP6	3.35458e-50	9.545	0.885	0	6.09191e-46
SLC35F3	1.20728e-31	9.5123	0.716	0	2.19242e-27
PDZRN4	3.78098e-33	9.4511	0.735	0	6.86626e-29
KIRREL3	8.3579e-40	9.40959	0.805	0	1.51779e-35
SLC35F4	1.96291e-43	9.38578	0.837	0	3.56464e-39
ELAPOR2	1.78753e-48	9.21766	0.874	0	3.24615e-44
TBX20	1.40414e-35	9.16943	0.763	0	2.54992e-31
SREK1	4.98848e-41	9.14952	0.816	0	9.05908e-37
ADCY8	6.39417e-36	9.13838	0.766	0	1.16118e-31
THSD7B	3.74904e-37	9.09468	0.779	0	6.80825e-33
ENTREP2	1.32028e-39	9.05086	0.803	0	2.39763e-35
EEF1A1	2.07846e-39	9.03485	0.801	0	3.77448e-35
ROBO2	1.83848e-106	9.03215	1	0.049	3.33867e-102
TMEM132D	2.0729e-35	8.99255	0.761	0	3.76439e-31
SGCZ	9.78543e-24	8.92244	0.599	0	1.77703e-19
GNAS	5.09919e-39	8.91594	0.798	0	9.26013e-35
TPK1	3.05257e-35	8.83883	0.759	0	5.54347e-31
CDH9	2.82123e-20	8.80836	0.536	0	5.12335e-16
TJP2	1.54572e-29	8.79849	0.688	0	2.80702e-25
PTPRT	7.6148e-25	8.74073	0.618	0	1.38285e-20
PAPPA2	4.72559e-22	8.74042	0.57	0	8.58168e-18
SDK1	2.07503e-73	8.73556	0.983	0.016	3.76825e-69
HMP19	2.64465e-33	8.73033	0.737	0	4.80269e-29
SLC24A4	2.35861e-31	8.68817	0.712	0	4.28323e-27
KLHL29	1.09123e-32	8.68699	0.729	0	1.98167e-28
TPT1	1.68467e-30	8.67929	0.701	0	3.05937e-26
KANK4	2.64465e-33	8.62943	0.737	0	4.80269e-29
MACROD2	1.54735e-32	8.60654	0.727	0	2.80998e-28
ZBTB32	2.86991e-29	8.56894	0.685	0	5.21176e-25
MATR3	9.48749e-36	8.47937	0.764	0	1.72293e-31
CTBP1	1.21928e-30	8.45915	0.703	0	2.21421e-26
HSD3B1	2.38562e-28	8.45878	0.672	0	4.33229e-24
C12ORF75	5.29559e-29	8.45565	0.681	0	9.6168e-25
HIC2	5.29559e-29	8.4282	0.681	0	9.6168e-25
RAB26	1.54735e-32	8.41998	0.727	0	2.80998e-28
C11orf16	2.86991e-29	8.37346	0.685	0	5.21176e-25
JAKMIP1	2.32375e-30	8.33708	0.699	0	4.21993e-26
ATP2B2	4.03806e-26	8.33188	0.638	0	7.33311e-22
CNTN5	3.76223e-14	8.32312	0.403	0	6.83221e-10
STARD13	2.3138e-65	8.29903	0.965	0.016	4.20186e-61
USP9Y	2.10785e-29	8.28442	0.686	0	3.82785e-25
FARS2	1.21928e-30	8.27851	0.703	0	2.21421e-26
HNRNPH1	8.27261e-30	8.26056	0.692	0	1.50231e-25
ZC3H11A	8.80929e-31	8.23152	0.705	0	1.59977e-26
MRPS5	2.76612e-24	8.22263	0.609	0	5.02327e-20
DACH2	1.4537e-20	8.18918	0.542	0	2.63992e-16
PACRG	1.0629e-18	8.18508	0.505	0	1.93023e-14
PFKFB4	1.1317e-29	8.18431	0.69	0	2.05518e-25
NYAP2	7.65326e-27	8.18355	0.649	0	1.38983e-22
GAPDH	5.92169e-24	8.16231	0.603	0	1.07538e-19
CCDC171	5.97401e-22	8.15964	0.568	0	1.08488e-17
KCNIP4	8.67773e-17	8.13855	0.464	0	1.57588e-12
ASCL2	3.06999e-26	8.11344	0.64	0	5.5751e-22
PDXDC1	4.35163e-27	8.10754	0.653	0	7.90256e-23
PPP4R4	3.37486e-23	8.06331	0.59	0	6.12875e-19
KCTD8	1.97381e-18	8.0415	0.499	0	3.58444e-14
SORCS2	6.35196e-15	8.02834	0.421	0	1.15352e-10
DNAAF9	1.03657e-27	8.01363	0.662	0	1.88241e-23
KHDRBS2	4.85881e-70	8.00515	0.978	0.016	8.8236e-66
COBL	2.97193e-18	7.99503	0.495	0	5.39702e-14
OLFML2A	7.6148e-25	7.98134	0.618	0	1.38285e-20
GOLGA4	9.12272e-26	7.95212	0.633	0	1.65669e-21
MSH4	1.33907e-26	7.92547	0.646	0	2.43176e-22
PHACTR3	2.39408e-21	7.89228	0.557	0	4.34766e-17
ADSS2	7.01055e-23	7.88605	0.584	0	1.27312e-18
SRSF6	5.86397e-25	7.84669	0.62	0	1.0649e-20
KLHDC7A	1.97828e-19	7.81497	0.519	0	3.59256e-15
PIP5K1B	5.9383e-21	7.80953	0.549	0	1.07839e-16
NKAIN3	1.33004e-80	7.77718	0.996	0.016	2.41536e-76
TRPC5	4.37235e-20	7.77673	0.532	0	7.94018e-16
SHROOM2	5.9383e-21	7.76487	0.549	0	1.07839e-16
VWC2L	2.82123e-20	7.75294	0.536	0	5.12335e-16
HTR1E	9.68185e-13	7.7474	0.367	0	1.75822e-08
PTCHD3	5.49968e-23	7.74434	0.586	0	9.98743e-19
CHRNA5	3.37486e-23	7.74374	0.59	0	6.12875e-19
PRMT8	1.4537e-20	7.74014	0.542	0	2.63992e-16
ERC2	2.65864e-55	7.73795	0.928	0.016	4.82809e-51
GPC6	4.83304e-66	7.73468	0.968	0.033	8.77681e-62
SLC44A5	1.51246e-21	7.73339	0.56	0	2.74662e-17
FAM21C	4.72559e-22	7.73218	0.57	0	8.58168e-18
WASHC2C	4.72559e-22	7.73218	0.57	0	8.58168e-18
GAB3	1.0629e-18	7.68985	0.505	0	1.93023e-14
TOX	6.35196e-15	7.68766	0.421	0	1.15352e-10
PPFIA1	1.90369e-21	7.67957	0.558	0	3.4571e-17
EEF1D	1.4537e-20	7.66578	0.542	0	2.63992e-16
LDB3	3.73626e-19	7.65902	0.514	0	6.78505e-15
MRPL57	8.63558e-19	7.6501	0.506	0	1.56822e-14
AGBL1	3.6883e-15	7.63809	0.427	0	6.69795e-11
SNX25	3.00826e-21	7.63787	0.555	0	5.46299e-17
PTMA	1.59811e-19	7.61277	0.521	0	2.90216e-15
HECW1	1.8147e-20	7.61047	0.54	0	3.2955e-16
NLGN4Y	8.98876e-14	7.58137	0.393	0	1.63236e-09
BAZ1A	4.61171e-19	7.58062	0.512	0	8.37486e-15
NUAK1	3.99498e-16	7.57702	0.449	0	7.25489e-12
HIVEP1	6.68399e-18	7.5737	0.488	0	1.21381e-13
ASXL3	2.4228e-18	7.54609	0.497	0	4.39981e-14
HMGN2P46	1.29004e-19	7.54352	0.523	0	2.34272e-15
HMGB1	9.98461e-18	7.54251	0.484	0	1.81321e-13
IL1RAPL1	1.77353e-15	7.51673	0.434	0	3.22074e-11
DDC	2.60297e-40	7.49404	0.833	0.016	4.72699e-36
CFAP61	2.69291e-17	7.49268	0.475	0	4.89033e-13
PIK3C2G	1.01834e-15	7.48915	0.44	0	1.8493e-11
KCNQ3	8.18962e-41	7.4855	0.842	0.016	1.48723e-36
PABPC1	2.4228e-18	7.47907	0.497	0	4.39981e-14
FHIT	1.31939e-11	7.47636	0.338	0	2.39601e-07
GRIP2	6.86037e-37	7.45285	0.807	0.016	1.24584e-32
TAF3	3.98729e-17	7.44143	0.471	0	7.24091e-13
PIN4	3.27781e-17	7.41258	0.473	0	5.9525e-13
ANAPC10	8.45475e-16	7.40569	0.442	0	1.53538e-11
BEAN1	1.21916e-17	7.39533	0.482	0	2.21399e-13
LIMS1	5.88935e-17	7.38588	0.468	0	1.06951e-12
ANKRD6	5.81828e-16	7.37328	0.445	0	1.0566e-11
ADCY2	1.28712e-47	7.37158	0.889	0.016	2.3374e-43
MACROH2A1	5.46342e-18	7.36746	0.49	0	9.92158e-14
SPOPL	1.81421e-17	7.36717	0.479	0	3.29461e-13
PCDHGC5	8.67773e-17	7.35595	0.464	0	1.57588e-12
SYN3	2.21801e-14	7.34196	0.408	0	4.02791e-10
SEMA5B	4.48244e-14	7.33689	0.401	0	8.14011e-10
L3MBTL3	1.05241e-16	7.33317	0.462	0	1.91118e-12
SKP1	1.27558e-16	7.33131	0.46	0	2.31645e-12
ENOX1	1.98154e-59	7.31396	0.948	0.016	3.59848e-55
UBR1	7.01111e-19	7.30396	0.508	0	1.27322e-14
ADGRB3	5.28256e-109	7.29594	0.994	0.098	9.59313e-105
SAMD12	4.58539e-47	7.29016	0.885	0.016	8.32707e-43
NAP1L1	3.30755e-16	7.27776	0.451	0	6.0065e-12
RGS7	7.35395e-74	7.27487	0.983	0.082	1.33548e-69
HSF2BP	2.1315e-15	7.26734	0.432	0	3.8708e-11
COL4A6	6.35196e-15	7.25348	0.421	0	1.15352e-10
FAM189A1	9.01209e-37	7.2522	0.803	0.016	1.6366e-32
DDX10	1.87061e-16	7.25077	0.456	0	3.39703e-12
FAM135B	4.48244e-14	7.24896	0.401	0	8.14011e-10
CYRIB	2.73684e-16	7.24264	0.453	0	4.97009e-12
IMPG1	1.6236e-10	7.24065	0.308	0	2.94845e-06
NKAIN4	1.22587e-15	7.24015	0.438	0	2.22618e-11
NPY7R	8.45475e-16	7.23769	0.442	0	1.53538e-11
NAB-1	1.01834e-15	7.22788	0.44	0	1.8493e-11
MND1	9.10269e-15	7.22527	0.417	0	1.65305e-10
H3F3C	1.47489e-15	7.22469	0.436	0	2.6784e-11
TMTC2	1.5636e-53	7.20664	0.926	0.033	2.83949e-49
MMD2	1.87061e-16	7.19707	0.456	0	3.39703e-12
CDH4	8.28273e-39	7.19472	0.826	0.016	1.50414e-34
A4GALT	1.47489e-15	7.1807	0.436	0	2.6784e-11
DOK6	5.25222e-65	7.17428	0.961	0.049	9.53804e-61
TRPM1	4.95392e-13	7.17296	0.375	0	8.99632e-09
PALS2	2.6465e-14	7.17108	0.406	0	4.80604e-10
CRYBG3	3.0738e-15	7.16919	0.429	0	5.58203e-11
ATP5L	7.559e-14	7.16051	0.395	0	1.37272e-09
MED27	1.85798e-14	7.14992	0.41	0	3.37409e-10
ATPIF1	1.08885e-14	7.1465	0.416	0	1.97735e-10
ARHGAP31	3.76223e-14	7.13056	0.403	0	6.83221e-10
ADAMTS6	3.07592e-12	7.12869	0.354	0	5.58588e-08
EPRS1	1.01834e-15	7.11449	0.44	0	1.8493e-11
NPM1	4.48244e-14	7.10397	0.401	0	8.14011e-10
CAP2	2.21801e-14	7.09865	0.408	0	4.02791e-10
DCDC2	5.86124e-13	7.08658	0.373	0	1.0644e-08
XK	3.6883e-15	7.08587	0.427	0	6.69795e-11
LHFPL3	1.56889e-09	7.08167	0.28	0	2.84911e-05
BRE	1.55561e-14	7.08056	0.412	0	2.82499e-10
LRRC7	1.08885e-14	7.07431	0.416	0	1.97735e-10
KIAA1841	3.1562e-14	7.07388	0.404	0	5.73167e-10
SANBR	3.1562e-14	7.07388	0.404	0	5.73167e-10
MRPS28	3.1562e-14	7.0659	0.404	0	5.73167e-10
GABRA2	1.34997e-12	7.04782	0.364	0	2.45154e-08
FHIP1A	5.33794e-14	7.0398	0.399	0	9.69369e-10
WTAP	3.76223e-14	7.03456	0.403	0	6.83221e-10
UNC-11	7.6059e-15	7.02557	0.419	0	1.38123e-10
SLC38A3	4.4233e-15	7.02073	0.425	0	8.03272e-11
TBC1D32	5.33794e-14	7.01646	0.399	0	9.69369e-10
GAREM1	2.12236e-13	7.00754	0.384	0	3.8542e-09
TRIP13	1.55561e-14	7.00402	0.412	0	2.82499e-10
YLPM1	1.55561e-14	6.99367	0.412	0	2.82499e-10
ATP5D	2.21548e-12	6.98989	0.358	0	4.02331e-08
MYO3B	6.40666e-11	6.98556	0.319	0	1.16345e-06
NANOS1	2.98305e-13	6.98239	0.38	0	5.41722e-09
XRCC4	4.72552e-10	6.9759	0.295	0	8.58155e-06
RERGL	1.1435e-12	6.97487	0.365	0	2.07659e-08
CABLES1	2.12236e-13	6.9522	0.384	0	3.8542e-09
SSTR5	3.76223e-14	6.94071	0.403	0	6.83221e-10
TBC1D1	1.87905e-12	6.93894	0.36	0	3.41235e-08
TMEM131L	2.21801e-14	6.93506	0.408	0	4.02791e-10
UNKL	6.35364e-14	6.93241	0.397	0	1.15382e-09
LHFPL5	1.06839e-13	6.91479	0.391	0	1.94019e-09
GRIK4	1.34997e-12	6.90795	0.364	0	2.45154e-08
HNRNPAB	4.48244e-14	6.89471	0.401	0	8.14011e-10
ZNF804A	4.48823e-53	6.88231	0.929	0.033	8.15063e-49
METTL24	3.53416e-13	6.87916	0.378	0	6.41803e-09
ZNF804B	1.89334e-10	6.86486	0.306	0	3.4383e-06
KCNQ5	3.47758e-65	6.85808	0.97	0.033	6.31528e-61
MCU	2.12825e-11	6.8543	0.332	0	3.8649e-07
PDS5A	4.95392e-13	6.85367	0.375	0	8.99632e-09
HINT-1	2.61104e-12	6.84949	0.356	0	4.74164e-08
MYO18B	6.35364e-14	6.84705	0.397	0	1.15382e-09
ZNF385D	7.48761e-11	6.81979	0.317	0	1.35975e-06
PUDP	4.95392e-13	6.80984	0.375	0	8.99632e-09
DARS1	9.68185e-13	6.80183	0.367	0	1.75822e-08
GRIN3A	2.49401e-11	6.79604	0.33	0	4.52912e-07
CACNA1C	6.11712e-81	6.79359	0.993	0.082	1.11087e-76
CIT	5.01621e-12	6.79199	0.349	0	9.10943e-08
ARNT2	9.68185e-13	6.78798	0.367	0	1.75822e-08
ADAMTS3	1.0216e-10	6.78057	0.314	0	1.85522e-06
IARS1	5.86124e-13	6.77961	0.373	0	1.0644e-08
EPHB2	2.21548e-12	6.77735	0.358	0	4.02331e-08
EZH2	4.68509e-11	6.77554	0.323	0	8.50812e-07
PREX1	1.54796e-11	6.77244	0.336	0	2.8111e-07
PALM2AKAP2	7.48761e-11	6.76971	0.317	0	1.35975e-06
KIAA1456	2.49401e-11	6.76226	0.33	0	4.52912e-07
RFX2	2.49401e-11	6.75139	0.33	0	4.52912e-07
NETO1	8.74766e-11	6.72789	0.315	0	1.58857e-06
OLA1	1.87905e-12	6.71501	0.36	0	3.41235e-08
ORAOV1	1.78895e-13	6.71066	0.386	0	3.24873e-09
SRP14	1.59303e-12	6.70994	0.362	0	2.89294e-08
PLEKHA7	7.48761e-11	6.7053	0.317	0	1.35975e-06
UNC79	1.16957e-99	6.69509	1	0.115	2.12394e-95
CARS1	3.07592e-12	6.69153	0.354	0	5.58588e-08
SNCAIP	5.89951e-12	6.68157	0.347	0	1.07135e-07
FKBP4	1.87905e-12	6.67688	0.36	0	3.41235e-08
KARS1	1.87905e-12	6.67294	0.36	0	3.41235e-08
EIF3K	5.89951e-12	6.65983	0.347	0	1.07135e-07
ARL4A	1.81542e-11	6.65503	0.334	0	3.2968e-07
PKLR	4.06099e-10	6.65179	0.297	0	7.37475e-06
TULP3	4.68509e-11	6.65083	0.323	0	8.50812e-07
BEND5	1.79551e-66	6.64439	0.972	0.033	3.26064e-62
ADAP1	2.92149e-11	6.64043	0.328	0	5.30542e-07
KCNH7	1.81268e-53	6.63607	0.929	0.033	3.29182e-49
SLA2	2.5719e-10	6.63331	0.302	0	4.67058e-06
KCND2	1.48272e-10	6.63066	0.364	0.016	2.69261e-06
BACH2	2.20709e-10	6.63011	0.304	0	4.00807e-06
CHRM3	1.47684e-39	6.62113	0.84	0.033	2.68195e-35
KCNE2	1.89334e-10	6.61829	0.306	0	3.4383e-06
TSSC1	1.87905e-12	6.61676	0.36	0	3.41235e-08
HNRNPA1	1.54796e-11	6.61634	0.336	0	2.8111e-07
RASGEF1C	4.72552e-10	6.60844	0.295	0	8.58155e-06
ATP5G2	1.19263e-10	6.60583	0.312	0	2.16581e-06
PDE1C	4.07927e-66	6.59822	0.97	0.016	7.40795e-62
CHN2	1.89334e-10	6.58671	0.306	0	3.4383e-06
GPR22	9.5736e-12	6.58445	0.341	0	1.73857e-07
FGD3	8.74766e-11	6.58246	0.315	0	1.58857e-06
IGF2BP3	7.43013e-10	6.58049	0.289	0	1.34931e-05
ATP5G3	4.72552e-10	6.57969	0.295	0	8.58155e-06
HOMER1	4.72552e-10	6.5723	0.295	0	8.58155e-06
USP6	3.42091e-11	6.56498	0.327	0	6.21238e-07
DOP1B	2.92149e-11	6.55853	0.328	0	5.30542e-07
CLVS1	1.05385e-08	6.55435	0.256	0	0.000191379
HYCC1	4.06099e-10	6.55146	0.297	0	7.37475e-06
DSCAML1	1.0216e-10	6.5432	0.314	0	1.85522e-06
PPP1R14C	3.48867e-10	6.54267	0.299	0	6.33543e-06
ZCCHC6	3.42091e-11	6.53885	0.327	0	6.21238e-07
NCALD	9.81945e-48	6.52142	0.9	0.049	1.78321e-43
IMMP1L	2.99595e-10	6.51028	0.301	0	5.44065e-06
PAPD5	1.39178e-10	6.50652	0.31	0	2.52748e-06
IQGAP3	1.87905e-12	6.4914	0.36	0	3.41235e-08
PLXNB3	4.00418e-11	6.49085	0.325	0	7.27158e-07
STX18	5.49688e-10	6.48823	0.293	0	9.98234e-06
C12orf75	4.82578e-26	6.4861	0.681	0.016	8.76361e-22
HIP1	1.19263e-10	6.47527	0.312	0	2.16581e-06
RYR2	1.97912e-31	6.47207	0.753	0.016	3.59408e-27
HIGD1C	2.20709e-10	6.46498	0.304	0	4.00807e-06
BRSK2	1.95816e-59	6.46318	0.952	0.033	3.55601e-55
MPP3	2.99595e-10	6.46297	0.301	0	5.44065e-06
TBC1D26	1.19263e-10	6.44644	0.312	0	2.16581e-06
NAV3	1.77142e-68	6.4464	0.98	0.066	3.2169e-64
TOX2	4.56372e-29	6.44252	0.724	0.016	8.28772e-25
GNAL	9.7396e-45	6.44097	0.881	0.033	1.76871e-40
TPM3	2.5719e-10	6.44046	0.302	0	4.67058e-06
ZCCHC8	1.81542e-11	6.43807	0.334	0	3.2968e-07
ATP5B	8.74766e-11	6.43529	0.315	0	1.58857e-06
DGKI	4.32373e-43	6.42603	0.868	0.033	7.8519e-39
PRELID1	1.56889e-09	6.42401	0.28	0	2.84911e-05
SHFM1	1.35197e-09	6.4191	0.282	0	2.45518e-05
ARHGAP40	1.35197e-09	6.41016	0.282	0	2.45518e-05
ATOSA	1.6236e-10	6.40827	0.308	0	2.94845e-06
STAG3	4.06099e-10	6.40596	0.297	0	7.37475e-06
RNF144B	6.82306e-09	6.39891	0.262	0	0.000123907
LYPLA1	4.72552e-10	6.3961	0.295	0	8.58155e-06
TKT	2.5719e-10	6.39596	0.302	0	4.67058e-06
TKTL1	2.5719e-10	6.39596	0.302	0	4.67058e-06
WWC1	2.4468e-09	6.39056	0.275	0	4.4434e-05
FKBP1A	6.82306e-09	6.38993	0.262	0	0.000123907
AHSA2	7.48761e-11	6.38903	0.317	0	1.35975e-06
COX5A	2.11061e-09	6.38556	0.276	0	3.83287e-05
FAM63B	6.40666e-11	6.38403	0.319	0	1.16345e-06
BMAL2	3.48867e-10	6.37568	0.299	0	6.33543e-06
CELF4	4.26443e-75	6.37215	0.987	0.082	7.7442e-71
AMER2	1.81542e-11	6.36846	0.334	0	3.2968e-07
PDE4DIP	1.6236e-10	6.36075	0.308	0	2.94845e-06
RAB33A	4.72552e-10	6.35923	0.295	0	8.58155e-06
OSBPL3	2.4468e-09	6.35921	0.275	0	4.4434e-05
MEMO1	3.48867e-10	6.35134	0.299	0	6.33543e-06
HSF3	7.43013e-10	6.34611	0.289	0	1.34931e-05
HYPK	4.40497e-09	6.33876	0.267	0	7.99942e-05
SPAG17	2.11061e-09	6.33402	0.276	0	3.83287e-05
KCNT1	1.05385e-08	6.32669	0.256	0	0.000191379
LARS1	2.83562e-09	6.32646	0.273	0	5.14948e-05
NRG3	1.29478e-19	6.32002	0.577	0.016	2.35132e-15
DAB1	2.40474e-64	6.31818	0.97	0.049	4.36701e-60
PCYT1B	7.88949e-09	6.31213	0.26	0	0.000143273
SMOC2	2.11642e-28	6.30096	0.716	0.016	3.84343e-24
ACADL	1.00295e-09	6.2997	0.286	0	1.82135e-05
PRIM2	8.63399e-10	6.29937	0.288	0	1.56793e-05
LETM1	1.35197e-09	6.28931	0.282	0	2.45518e-05
CNTNAP2	4.90959e-86	6.28815	0.991	0.098	8.91581e-82
CDC42	6.39192e-10	6.28727	0.291	0	1.16077e-05
ATP5J2	2.5719e-10	6.28726	0.302	0	4.67058e-06
ABCC13	1.00295e-09	6.28235	0.286	0	1.82135e-05
HHLA2	3.80468e-09	6.27694	0.269	0	6.9093e-05
ZZZ3	6.39192e-10	6.27575	0.291	0	1.16077e-05
DENND2B	1.35197e-09	6.27323	0.282	0	2.45518e-05
CSTPP1	2.4468e-09	6.27103	0.275	0	4.4434e-05
IFITM5	1.21742e-08	6.26991	0.254	0	0.000221084
MTFR2	4.06099e-10	6.26549	0.297	0	7.37475e-06
PRKX	1.82001e-09	6.26379	0.278	0	3.30513e-05
MKRN4P	1.16465e-09	6.26244	0.284	0	2.11501e-05
MACIR	8.63399e-10	6.25874	0.288	0	1.56793e-05
RTFDC1	6.39192e-10	6.2492	0.291	0	1.16077e-05
GARRE1	3.28514e-09	6.24591	0.271	0	5.96581e-05
ATP5I	3.28514e-09	6.23974	0.271	0	5.96581e-05
PHACTR1	4.20969e-20	6.2355	0.584	0.016	7.64479e-16
GPX1	1.62317e-08	6.23519	0.25	0	0.000294767
GATSL2	1.62317e-08	6.23382	0.25	0	0.000294767
UBE2V2	1.00295e-09	6.22743	0.286	0	1.82135e-05
YPEL1	1.21742e-08	6.21547	0.254	0	0.000221084
ANKRD34B	1.35197e-09	6.20688	0.282	0	2.45518e-05
OSBPL5	1.33996e-21	6.19082	0.612	0.016	2.43338e-17
DYNC2I1	1.21742e-08	6.18635	0.254	0	0.000221084
YY2	2.11061e-09	6.18072	0.276	0	3.83287e-05
SLC25A3	5.09832e-09	6.17682	0.265	0	9.25855e-05
BPNT2	4.40497e-09	6.17581	0.267	0	7.99942e-05
MGEA5	7.43013e-10	6.17425	0.289	0	1.34931e-05
WHSC1L1	2.83562e-09	6.15147	0.273	0	5.14948e-05
MPP4	1.05385e-08	6.15096	0.256	0	0.000191379
FANCM	1.05385e-08	6.12551	0.256	0	0.000191379
FAM134A	4.40497e-09	6.11661	0.267	0	7.99942e-05
HN1	4.40497e-09	6.09131	0.267	0	7.99942e-05
SYN2	2.80335e-71	6.08945	0.978	0.082	5.09088e-67
MRPS27	1.05385e-08	6.08094	0.256	0	0.000191379
TACR1	1.21742e-08	6.07335	0.254	0	0.000221084
METTL8	5.09832e-09	6.06467	0.265	0	9.25855e-05
ADRA2B	6.82306e-09	6.05474	0.262	0	0.000123907
AMPH	7.40568e-21	6.04832	0.599	0.016	1.34487e-16
SSB	6.82306e-09	6.04636	0.262	0	0.000123907
ZFAND6	1.62317e-08	6.04564	0.25	0	0.000294767
THSD7A	4.97729e-40	6.04532	0.839	0.016	9.03876e-36
FAM149B1	5.09832e-09	6.04196	0.265	0	9.25855e-05
DNAJC18	1.05385e-08	6.02908	0.256	0	0.000191379
U2AF1	9.11973e-09	6.02162	0.258	0	0.000165614
CCER1	1.05385e-08	6.01023	0.256	0	0.000191379
ARL15	7.44694e-40	5.99958	0.855	0.049	1.35236e-35
ZNF536	1.60655e-33	5.99587	0.796	0.049	2.9175e-29
DACH1	6.82301e-86	5.98692	0.996	0.115	1.23906e-81
IPO7	1.62317e-08	5.95675	0.25	0	0.000294767
SLC16A2	1.62317e-08	5.95235	0.25	0	0.000294767
MDGA2	1.21891e-47	5.91572	0.892	0.016	2.21354e-43
ATP8A2	4.64808e-43	5.8902	0.878	0.049	8.44092e-39
SMPD3	1.90282e-19	5.88149	0.575	0.016	3.45551e-15
IGSF5	1.17852e-24	5.80966	0.664	0.016	2.14018e-20
ADK	6.07123e-122	5.78605	0.994	0.23	1.10254e-117
LARGE1	4.46603e-16	5.75271	0.505	0.016	8.11031e-12
PCDHA6	3.42428e-34	5.75216	0.785	0.016	6.2185e-30
PLCL1	1.50931e-20	5.73669	0.597	0.016	2.74091e-16
TMCC1	1.7564e-18	5.67606	0.557	0.016	3.18963e-14
ESRRG	2.66312e-51	5.65715	0.913	0.016	4.83622e-47
PDE10A	2.13569e-36	5.65245	0.85	0.098	3.87841e-32
SH3RF3	1.23396e-26	5.6338	0.694	0.016	2.24087e-22
SLC8A3	2.1783e-28	5.6232	0.737	0.033	3.9558e-24
NHS	2.52916e-46	5.58262	0.905	0.049	4.59296e-42
PAPOLB	7.05663e-21	5.54173	0.603	0.016	1.28148e-16
PDE4B	3.52341e-18	5.54069	0.553	0.016	6.39852e-14
PCDH15	6.23e-28	5.52384	0.74	0.049	1.13137e-23
PURG	2.71521e-18	5.49463	0.555	0.016	4.93082e-14
LNX2	2.81864e-33	5.464	0.792	0.033	5.11865e-29
PLBD1	6.73814e-40	5.39408	0.865	0.049	1.22365e-35
PTPRK	1.76637e-45	5.39266	0.905	0.066	3.20772e-41
PTBP2	3.38253e-34	5.38693	0.801	0.033	6.14268e-30
RIMS2	1.04783e-76	5.36897	0.987	0.148	1.90285e-72
OPHN1	2.43951e-16	5.36139	0.514	0.016	4.43016e-12
ARPP21	1.59803e-35	5.35389	0.798	0.016	2.90202e-31
HSD11B2	3.3364e-20	5.32905	0.592	0.016	6.05891e-16
CACNB2	2.17049e-76	5.29995	0.993	0.148	3.94161e-72
FANCD2	1.7312e-11	5.28759	0.397	0.016	3.14386e-07
KANK1	2.96144e-26	5.28014	0.688	0.016	5.37797e-22
DLG2	1.27531e-153	5.2713	1	0.361	2.31596e-149
DGKH	2.02076e-68	5.26276	0.985	0.082	3.6697e-64
GRID1	1.86818e-68	5.2569	0.985	0.164	3.39261e-64
FNBP1L	4.50017e-26	5.25214	0.707	0.033	8.1723e-22
LRRC28	1.12198e-11	5.24377	0.403	0.016	2.03752e-07
CTXN1	2.80067e-23	5.24304	0.644	0.016	5.08601e-19
BCL2	1.74557e-27	5.21827	0.705	0.016	3.16996e-23
JARID2	2.57769e-36	5.20462	0.824	0.033	4.68109e-32
GPC5	5.6887e-15	5.20237	0.512	0.033	1.03307e-10
NOL4	3.05461e-39	5.20194	0.859	0.049	5.54716e-35
BCAS3	3.6068e-33	5.19841	0.803	0.049	6.54994e-29
NKAIN2	5.24354e-15	5.1918	0.488	0.016	9.52228e-11
AUTS2	2.47362e-108	5.19102	0.993	0.23	4.4921e-104
PARD3B	6.75046e-32	5.18683	0.779	0.033	1.22588e-27
CDHR3	1.01262e-21	5.18021	0.642	0.033	1.83892e-17
TMEFF1	2.79723e-21	5.13819	0.636	0.033	5.07977e-17
AMMECR1	8.99208e-14	5.12739	0.458	0.016	1.63296e-09
DPP6	2.14321e-120	5.12363	1	0.311	3.89207e-116
NSD2	3.30072e-29	5.09587	0.75	0.033	5.99411e-25
ST8SIA6	2.10804e-31	5.07027	0.753	0.016	3.8282e-27
PTH1R	1.73993e-47	5.05222	0.915	0.049	3.15972e-43
TENM4	2.41809e-61	5.04023	0.972	0.066	4.39125e-57
TSNARE1	1.13595e-30	5.00267	0.766	0.033	2.06289e-26
NKD1	1.0641e-09	4.98828	0.354	0.016	1.9324e-05
WSCD1	5.65782e-11	4.97805	0.386	0.016	1.02746e-06
NRXN1	4.61484e-66	4.96215	0.985	0.082	8.38056e-62
CADM2	2.08145e-60	4.94605	0.972	0.246	3.77992e-56
CTDSPL	1.78522e-36	4.93493	0.839	0.049	3.24196e-32
CDK14	3.74722e-44	4.93301	0.909	0.115	6.80495e-40
KIAA0319	6.61411e-37	4.9239	0.829	0.033	1.20112e-32
PLXNA4	3.13121e-78	4.90879	0.998	0.18	5.68628e-74
GPR158	1.07375e-23	4.89711	0.692	0.049	1.94994e-19
ZNF423	2.00033e-28	4.88183	0.716	0.016	3.63261e-24
GPLD1	3.94604e-12	4.88083	0.442	0.033	7.16601e-08
CTNNA2	1.3657e-58	4.84915	0.97	0.115	2.48011e-54
CHN1	1.62759e-15	4.8388	0.499	0.016	2.95571e-11
AKAP8	3.65268e-11	4.83343	0.393	0.016	6.63326e-07
CDKL5	3.11512e-30	4.81744	0.738	0.016	5.65705e-26
APBA1	9.19728e-14	4.8168	0.482	0.033	1.67023e-09
GRM7	1.39703e-32	4.81358	0.814	0.066	2.53701e-28
CCDC88C	4.75179e-09	4.80792	0.336	0.016	8.62926e-05
SLC37A4	8.37435e-29	4.80572	0.746	0.033	1.52078e-24
NRG1	6.32591e-52	4.79917	0.948	0.131	1.14879e-47
MMP16	3.55271e-18	4.79814	0.583	0.033	6.45173e-14
KDM7A	2.64399e-16	4.79437	0.516	0.016	4.80149e-12
CNKSR2	2.3127e-78	4.79054	0.996	0.18	4.19986e-74
TET1	1.72896e-29	4.78842	0.77	0.049	3.13979e-25
TCF4	1.10079e-73	4.7417	0.996	0.18	1.99904e-69
PHF21B	6.84958e-23	4.72603	0.683	0.049	1.24388e-18
POLA1	8.57455e-30	4.72143	0.785	0.066	1.55714e-25
ZFYVE28	2.82069e-18	4.72074	0.555	0.016	5.12238e-14
EML6	6.11813e-37	4.701	0.844	0.049	1.11105e-32
GAL	5.07283e-48	4.66684	0.892	0.016	9.21226e-44
FGGY	1.26575e-08	4.66418	0.323	0.016	0.000229861
MAGI2	3.20551e-59	4.65208	0.968	0.18	5.82121e-55
KIAA0825	4.01235e-15	4.64567	0.49	0.016	7.28643e-11
CARS	1.09612e-09	4.62735	0.354	0.016	1.99056e-05
KCNC1	2.34715e-12	4.62376	0.453	0.033	4.26243e-08
FRMD3	6.50553e-20	4.62184	0.584	0.016	1.1814e-15
FGF14	1.57125e-39	4.62041	0.904	0.18	2.85339e-35
MYRIP	1.15719e-28	4.61506	0.744	0.033	2.10145e-24
HDAC4	2.67815e-36	4.61225	0.839	0.049	4.86352e-32
DMD	3.13365e-44	4.59146	0.896	0.049	5.69071e-40
CCAR1	3.15437e-20	4.58391	0.59	0.016	5.72834e-16
HPS3	3.03341e-12	4.58333	0.449	0.033	5.50868e-08
KIF26A	2.39381e-47	4.56652	0.929	0.115	4.34715e-43
EPHA7	2.40663e-12	4.53935	0.425	0.016	4.37043e-08
GCH1	1.52017e-22	4.53846	0.679	0.049	2.76063e-18
MBNL3	1.82212e-34	4.52987	0.807	0.033	3.30897e-30
NHSL1	2.91428e-45	4.51895	0.874	0.016	5.29233e-41
BEGAIN	6.9995e-16	4.51269	0.56	0.049	1.27111e-11
GNB4	2.66646e-14	4.50975	0.471	0.016	4.8423e-10
PPAT	6.32775e-08	4.50939	0.302	0.016	0.00114912
MTCL1	9.57132e-25	4.50304	0.711	0.049	1.73815e-20
DENND5A	1.16643e-10	4.48483	0.382	0.016	2.11823e-06
PCDH17	4.62461e-40	4.47781	0.879	0.066	8.39829e-36
ZDBF2	1.23099e-08	4.47385	0.325	0.016	0.000223547
PDE9A	3.33869e-31	4.45588	0.748	0.016	6.06307e-27
TXNL4B	1.60708e-10	4.44493	0.378	0.016	2.91846e-06
NPAS3	1.00749e-33	4.44255	0.8	0.033	1.82961e-29
OSBPL6	4.94271e-13	4.43933	0.442	0.016	8.97596e-09
ITGA8	9.38412e-33	4.43829	0.84	0.115	1.70416e-28
PKP4	1.26513e-17	4.41813	0.573	0.033	2.29749e-13
EIF2B3	7.6178e-12	4.41279	0.44	0.033	1.38339e-07
RIMS1	3.55218e-44	4.41117	0.915	0.098	6.45077e-40
RAB37	2.62124e-07	4.40284	0.284	0.016	0.00476017
RORA	9.20973e-104	4.40231	1	0.377	1.67249e-99
UNC13B	1.33313e-36	4.40003	0.842	0.049	2.42097e-32
GUCY1A2	3.35731e-07	4.39293	0.282	0.016	0.00609688
PRIMA1	3.66085e-40	4.37962	0.855	0.033	6.6481e-36
DOK5	7.00626e-07	4.37608	0.271	0.016	0.0127234
ANK1	6.79654e-07	4.36083	0.269	0.016	0.0123425
MAGI1	8.6827e-34	4.33775	0.814	0.049	1.57678e-29
DCLK1	9.57467e-28	4.33445	0.751	0.049	1.73876e-23
IL20RA	1.49485e-17	4.32144	0.596	0.049	2.71465e-13
HECA	8.64341e-09	4.31938	0.33	0.016	0.000156964
MED12L	4.92218e-11	4.30768	0.391	0.016	8.93867e-07
RNF111	9.19797e-12	4.30511	0.41	0.016	1.67035e-07
SYT1	5.30252e-103	4.29939	0.998	0.361	9.62938e-99
CLVS2	1.14006e-18	4.29514	0.594	0.033	2.07035e-14
SUGCT	5.71606e-18	4.28236	0.545	0.016	1.03804e-13
PPFIA2	5.72626e-61	4.28101	0.974	0.197	1.03989e-56
SIPA1L2	6.69958e-21	4.27871	0.633	0.033	1.21664e-16
ELL	1.84028e-16	4.27084	0.551	0.033	3.34196e-12
XPO1	1.34876e-17	4.26074	0.596	0.049	2.44934e-13
KCNB2	5.65729e-25	4.25906	0.696	0.033	1.02736e-20
ISL1	2.07798e-39	4.2574	0.865	0.049	3.77362e-35
SNX29	1.1102e-12	4.25293	0.466	0.033	2.01611e-08
GNB1L	6.22477e-07	4.24578	0.273	0.016	0.0113042
FRY	1.46769e-42	4.24521	0.894	0.066	2.66533e-38
MAST2	3.09625e-18	4.24069	0.609	0.049	5.6228e-14
PTPRM	1.88736e-51	4.2386	0.967	0.246	3.42744e-47
RAB3C	2.23408e-61	4.2373	0.989	0.279	4.05708e-57
BRSK1	9.40446e-52	4.23137	0.952	0.148	1.70785e-47
SYT9	7.10485e-12	4.22994	0.412	0.016	1.29024e-07
MAMLD1	3.73226e-08	4.22043	0.312	0.016	0.000677778
CNTFR	2.28275e-29	4.21203	0.788	0.066	4.14547e-25
GALNT18	9.25338e-15	4.19962	0.54	0.049	1.68041e-10
STRN	6.67731e-14	4.19297	0.495	0.033	1.2126e-09
TESC	5.97036e-36	4.18152	0.861	0.082	1.08422e-31
COP1	1.56684e-19	4.17334	0.647	0.066	2.84537e-15
NBEA	1.77103e-55	4.16634	0.959	0.131	3.2162e-51
FNBP1	1.22432e-32	4.15603	0.84	0.098	2.22337e-28
FMN2	3.40436e-19	4.14738	0.627	0.049	6.18232e-15
PDK3	3.79378e-10	4.14433	0.367	0.016	6.88951e-06
RBMS3	1.09596e-91	4.14111	0.996	0.311	1.99026e-87
RIMBP2	2.45764e-72	4.13818	0.976	0.246	4.46308e-68
FAM110B	1.55932e-09	4.10694	0.351	0.016	2.83172e-05
SUFU	6.70075e-07	4.09959	0.273	0.016	0.0121686
DIRAS2	4.91548e-09	4.0995	0.367	0.033	8.92652e-05
PPM1H	9.95048e-22	4.09294	0.646	0.033	1.80701e-17
ARL13B	1.63206e-10	4.08983	0.377	0.016	2.96381e-06
MPP7	1.55738e-12	4.08008	0.427	0.016	2.8282e-08
STK32C	6.59846e-24	4.08004	0.679	0.033	1.19828e-19
INPP4B	8.42441e-16	4.07718	0.575	0.066	1.52987e-11
EPHA5	6.29437e-12	4.0758	0.473	0.049	1.14306e-07
CACNA2D2	8.97015e-26	4.06941	0.707	0.033	1.62898e-21
CDK19	1.51926e-08	4.04823	0.323	0.016	0.000275898
TRPM3	1.67055e-08	4.04223	0.321	0.016	0.000303372
DLGAP1	5.08397e-26	4.03009	0.761	0.082	9.23248e-22
PROM1	1.57172e-22	4.02694	0.659	0.033	2.85424e-18
EVC2	1.04449e-12	4.022	0.43	0.016	1.8968e-08
ARID1B	8.48429e-52	4.01845	0.957	0.131	1.54075e-47
SYT14	5.29529e-26	4.01819	0.731	0.049	9.61624e-22
UBE2F	1.09572e-08	4.00797	0.358	0.033	0.000198982
TAFA1	5.29161e-11	4.00146	0.388	0.016	9.60956e-07
NUBPL	7.15054e-18	3.99967	0.54	0.016	1.29854e-13
SYNCRIP	9.11882e-07	3.99383	0.269	0.016	0.0165598
CARMIL1	7.09113e-15	3.97554	0.518	0.033	1.28775e-10
HDAC9	2.24672e-64	3.96283	0.981	0.377	4.08005e-60
PARD3	1.53303e-43	3.9589	0.922	0.131	2.78399e-39
LRFN5	2.29565e-06	3.95845	0.256	0.016	0.041689
TTC39C	1.06251e-27	3.95653	0.77	0.066	1.92952e-23
MGAT4A	6.50453e-17	3.95053	0.586	0.049	1.18122e-12
GFRA3	1.61317e-26	3.94314	0.683	0.016	2.92952e-22
BICD2	2.23358e-20	3.94271	0.623	0.033	4.05618e-16
TRAPPC9	1.09622e-32	3.93873	0.846	0.115	1.99073e-28
NRIP1	1.56487e-30	3.92836	0.801	0.066	2.8418e-26
NR3C2	1.39062e-27	3.91896	0.794	0.098	2.52536e-23
ZMIZ1	1.16084e-63	3.90777	0.989	0.23	2.10808e-59
SPATA5	2.64684e-15	3.9004	0.555	0.049	4.80666e-11
EGFR	1.7197e-17	3.88327	0.62	0.066	3.12298e-13
DENND1B	3.35597e-12	3.87541	0.456	0.033	6.09445e-08
TBC1D5	2.91221e-40	3.86973	0.9	0.098	5.28856e-36
ATP5PO	1.36067e-06	3.86326	0.263	0.016	0.0247098
ADAMTSL3	2.42099e-08	3.86275	0.315	0.016	0.000439652
CPPED1	1.81979e-08	3.854	0.354	0.033	0.000330474
GHR	7.90349e-21	3.85317	0.709	0.098	1.43527e-16
MRTFA	5.39852e-10	3.84783	0.399	0.033	9.80371e-06
ZNF462	2.77544e-31	3.84636	0.82	0.082	5.04021e-27
MCF2L	2.71757e-58	3.84092	0.981	0.23	4.93511e-54
HPX	6.25109e-10	3.82301	0.358	0.016	1.1352e-05
LMO7	1.13585e-13	3.82217	0.49	0.033	2.0627e-09
TCF7L2	8.97245e-22	3.82013	0.692	0.066	1.6294e-17
KCNMA1	1.48563e-79	3.81555	0.987	0.328	2.6979e-75
MBP	5.34805e-13	3.81197	0.434	0.016	9.71206e-09
PRKN	1.96418e-19	3.79949	0.672	0.082	3.56695e-15
TMEM178B	8.72213e-25	3.7984	0.761	0.098	1.58394e-20
TRMT9B	1.07363e-07	3.79085	0.33	0.033	0.0019497
MINDY4	5.67397e-10	3.78057	0.399	0.033	1.03039e-05
LRP1B	5.39033e-29	3.7741	0.768	0.049	9.78885e-25
FAM163B	1.53118e-17	3.76284	0.599	0.049	2.78063e-13
CTTNBP2	1.71312e-06	3.7417	0.26	0.016	0.0311102
TSHZ2	7.93977e-74	3.73424	0.994	0.393	1.44186e-69
MAP4K4	1.65758e-42	3.73074	0.907	0.082	3.01016e-38
TMEM108	2.53357e-24	3.73063	0.761	0.098	4.60097e-20
SASH1	2.93209e-11	3.72485	0.462	0.049	5.32468e-07
ZRSR2	3.44495e-11	3.72408	0.39	0.016	6.25603e-07
KDM4C	2.59296e-22	3.72325	0.716	0.082	4.70882e-18
SPICE1	1.6208e-14	3.71593	0.508	0.033	2.94338e-10
NCOA2	4.11347e-26	3.70619	0.779	0.098	7.47007e-22
IQSEC1	4.94843e-51	3.70073	0.972	0.197	8.98636e-47
UNC5C	3.78598e-51	3.66892	0.972	0.23	6.87533e-47
ZNF618	1.95465e-20	3.66556	0.649	0.049	3.54965e-16
GPHN	4.95869e-43	3.66511	0.924	0.115	9.00497e-39
STXBP5L	1.11019e-30	3.65816	0.785	0.049	2.01611e-26
CLK4	1.16691e-10	3.65289	0.417	0.033	2.11911e-06
NABP1	4.346e-09	3.65185	0.334	0.016	7.89233e-05
FIG4	3.53646e-11	3.64544	0.43	0.033	6.42221e-07
PLCB1	7.15915e-25	3.64467	0.766	0.098	1.3001e-20
SIPA1L1	3.246e-29	3.63955	0.829	0.115	5.89474e-25
SLC35F2	1.64066e-13	3.63464	0.443	0.016	2.97944e-09
PRRG1	1.49698e-08	3.63144	0.319	0.016	0.000271851
RAVER1	2.4618e-31	3.62694	0.848	0.131	4.47062e-27
SCML2	2.53794e-09	3.59915	0.34	0.016	4.6089e-05
GRIN2A	5.54951e-15	3.59543	0.573	0.066	1.00779e-10
SLC25A14	5.35126e-07	3.59452	0.275	0.016	0.00971788
SLC35F1	9.17628e-25	3.57888	0.692	0.033	1.66641e-20
GRB10	6.71553e-39	3.57804	0.902	0.115	1.21954e-34
DIAPH2	6.42719e-24	3.57452	0.74	0.082	1.16718e-19
PGBD5	2.3054e-12	3.5656	0.46	0.033	4.18661e-08
SUCLG2	1.3525e-12	3.54455	0.464	0.033	2.45614e-08
DOC2B	1.89888e-24	3.53808	0.711	0.049	3.44836e-20
SIDT1	3.46512e-15	3.53368	0.575	0.066	6.29267e-11
ERICH1	4.24316e-15	3.53217	0.551	0.049	7.70558e-11
ZNF608	7.17955e-16	3.53184	0.59	0.066	1.30381e-11
XYLT1	2.79926e-07	3.52706	0.321	0.033	0.00508345
TNIK	1.08738e-19	3.51622	0.66	0.066	1.97468e-15
SLC12A7	4.05688e-24	3.51487	0.705	0.049	7.3673e-20
SLC4A7	1.70746e-07	3.51464	0.288	0.016	0.00310074
NAA16	2.88177e-09	3.49687	0.408	0.049	5.23329e-05
NPAS2	4.26254e-22	3.48928	0.698	0.066	7.74078e-18
EIF4EBP3	8.29646e-22	3.47727	0.672	0.049	1.50664e-17
EVC	3.94516e-11	3.47693	0.382	0.016	7.16441e-07
JAG2	3.57673e-10	3.47665	0.36	0.016	6.49534e-06
NEDD4	4.17126e-15	3.4691	0.551	0.049	7.57502e-11
AFAP1	4.48606e-20	3.46813	0.644	0.049	8.14668e-16
ITM2A	4.10457e-17	3.46157	0.557	0.033	7.4539e-13
CACNA2D1	5.86136e-52	3.45239	0.972	0.262	1.06442e-47
ABLIM2	1.28276e-22	3.43349	0.718	0.082	2.32949e-18
MAPK11	9.13118e-09	3.43292	0.365	0.033	0.000165822
CDH18	3.55858e-29	3.42956	0.872	0.262	6.46238e-25
MIPEP	5.52238e-08	3.42795	0.301	0.016	0.00100286
SSU72	4.21259e-07	3.42331	0.315	0.033	0.00765006
EDIL3	1.39251e-11	3.42037	0.471	0.049	2.5288e-07
SRGAP1	2.25564e-11	3.414	0.466	0.049	4.09624e-07
CDC14B	6.87849e-14	3.40475	0.525	0.049	1.24913e-09
EIF2AK3	9.52696e-08	3.39726	0.293	0.016	0.0017301
SOGA3	3.21237e-45	3.38567	0.954	0.197	5.83366e-41
ADCY6	4.82398e-21	3.38187	0.729	0.115	8.76035e-17
MTHFD1L	3.58723e-18	3.37882	0.61	0.049	6.5144e-14
ROR2	8.51865e-07	3.37396	0.332	0.049	0.0154699
NCOA3	3.68039e-10	3.36713	0.358	0.016	6.68359e-06
PDE3B	4.58627e-18	3.36657	0.573	0.033	8.32867e-14
RASGEF1B	2.13946e-22	3.3663	0.722	0.082	3.88525e-18
NR2C1	5.28313e-08	3.36406	0.343	0.033	0.000959417
MAST4	1.29033e-33	3.35271	0.857	0.098	2.34325e-29
ACACA	6.60313e-09	3.35257	0.369	0.033	0.000119913
ATP8A1	6.98438e-22	3.34945	0.729	0.098	1.26836e-17
MOB1B	8.24352e-15	3.34927	0.544	0.049	1.49702e-10
DENND1A	3.06618e-29	3.34899	0.768	0.049	5.56818e-25
RSU1	3.99808e-08	3.34042	0.377	0.049	0.000726052
BANP	6.64822e-09	3.3364	0.369	0.033	0.000120732
MAD1L1	1.641e-07	3.33453	0.286	0.016	0.00298005
USP6NL	4.7056e-11	3.3337	0.378	0.016	8.54537e-07
ALDH5A1	3.55613e-13	3.33271	0.473	0.033	6.45794e-09
RBM10	3.52622e-40	3.33204	0.92	0.148	6.40361e-36
MAP2K5	4.97229e-19	3.32263	0.686	0.098	9.02969e-15
PCGF6	8.53767e-10	3.32044	0.347	0.016	1.55044e-05
GMDS	5.50497e-15	3.32034	0.612	0.098	9.99702e-11
LRIG1	6.47304e-10	3.31189	0.351	0.016	1.1755e-05
PHLDB2	7.9606e-16	3.30473	0.564	0.049	1.44564e-11
WAC	1.84455e-16	3.29378	0.549	0.033	3.34971e-12
ADARB1	1.65996e-12	3.29281	0.494	0.049	3.01449e-08
MYCBP2	1.89864e-25	3.29171	0.788	0.115	3.44793e-21
AFG1L	3.75126e-07	3.28872	0.317	0.033	0.00681229
FAM172A	3.04665e-18	3.28214	0.675	0.098	5.53271e-14
LRRC55	5.01567e-13	3.27972	0.423	0.016	9.10845e-09
XKR4	4.1772e-07	3.27896	0.315	0.033	0.00758579
SLCO3A1	1.04857e-26	3.26943	0.8	0.115	1.9042e-22
CACNA1B	2.28975e-41	3.26738	0.944	0.213	4.15819e-37
SRPK2	3.49839e-24	3.26605	0.761	0.098	6.35308e-20
PRKCE	6.53181e-41	3.26595	0.885	0.066	1.18618e-36
DEPDC5	5.69231e-07	3.26119	0.269	0.016	0.0103372
FSTL5	2.25783e-51	3.25955	0.972	0.262	4.10022e-47
PLCB4	4.2365e-46	3.25649	0.963	0.246	7.69349e-42
TLE4	1.16469e-14	3.25491	0.542	0.049	2.11508e-10
SLC20A2	1.52223e-10	3.23749	0.41	0.033	2.76437e-06
B3GALT5	1.60282e-08	3.23585	0.358	0.033	0.000291072
PKN2	7.1833e-22	3.23578	0.712	0.082	1.30449e-17
GARNL3	3.24674e-13	3.2288	0.536	0.066	5.89608e-09
DGKB	1.78242e-27	3.21784	0.87	0.279	3.23687e-23
COL4A5	2.00045e-07	3.21589	0.325	0.033	0.00363282
BBS9	1.28013e-23	3.21523	0.755	0.098	2.32471e-19
CBLB	4.93602e-15	3.20795	0.516	0.033	8.96381e-11
NPTX1	3.5277e-09	3.18822	0.408	0.049	6.4063e-05
CHD7	7.94907e-29	3.18081	0.783	0.066	1.44355e-24
CAPN5	1.99565e-26	3.17806	0.755	0.066	3.62411e-22
UHRF2	1.14543e-11	3.17527	0.473	0.049	2.08009e-07
ZC3H12B	7.44127e-08	3.16649	0.338	0.033	0.00135134
DISP1	3.76591e-07	3.16387	0.273	0.016	0.00683889
PNN	6.93963e-16	3.16294	0.614	0.082	1.26024e-11
NCKAP5	1.09492e-07	3.15698	0.364	0.049	0.00198838
SGF29	8.1862e-19	3.15618	0.646	0.066	1.48661e-14
AKAP13	6.17673e-40	3.15546	0.935	0.18	1.12169e-35
DTNBP1	9.14731e-10	3.15162	0.391	0.033	1.66115e-05
DOCK1	5.08193e-08	3.15131	0.375	0.049	0.000922878
CTDP1	1.99197e-14	3.14965	0.499	0.033	3.61743e-10
PDE7A	2.54368e-08	3.14796	0.304	0.016	0.000461933
ATP7A	4.25793e-19	3.1456	0.733	0.164	7.7324e-15
KL	4.23597e-16	3.14302	0.566	0.049	7.69253e-12
YPEL2	9.93995e-32	3.13184	0.811	0.066	1.80509e-27
DOCK3	4.19983e-19	3.13149	0.688	0.098	7.62688e-15
TCF20	2.32651e-17	3.11911	0.62	0.066	4.22494e-13
CHST8	1.98361e-09	3.11029	0.384	0.033	3.60223e-05
NCOA6	8.11729e-11	3.09582	0.451	0.049	1.4741e-06
PFKP	3.68648e-09	3.08981	0.432	0.066	6.69465e-05
CNTNAP5	1.36e-13	3.08864	0.568	0.082	2.46975e-09
AGPAT4	2.06363e-10	3.08788	0.44	0.049	3.74756e-06
CCDC142	1.62018e-06	3.08381	0.297	0.033	0.0294225
TMCC3	1.04689e-06	3.08262	0.334	0.049	0.0190116
ROCK2	6.80742e-24	3.08003	0.742	0.082	1.23623e-19
AGAP1	2.52665e-31	3.07596	0.857	0.131	4.5884e-27
ANK3	6.94067e-14	3.0744	0.609	0.115	1.26043e-09
VTI1A	7.34408e-23	3.06279	0.746	0.098	1.33368e-18
RPGR	1.4877e-08	3.0627	0.358	0.033	0.000270166
CDK17	3.53208e-19	3.06018	0.692	0.098	6.41426e-15
USP7	2.76149e-12	3.05772	0.538	0.082	5.01486e-08
RASD1	3.1738e-18	3.05354	0.635	0.066	5.76362e-14
USP45	5.61918e-09	3.04993	0.403	0.049	0.000102044
DCLK2	6.23755e-16	3.0363	0.636	0.098	1.13274e-11
RALGPS2	1.46008e-13	3.02046	0.518	0.049	2.6515e-09
MCC	1.36611e-11	3.02004	0.521	0.082	2.48086e-07
TPD52	1.00396e-12	3.01744	0.525	0.066	1.82319e-08
SAMD4A	6.20124e-09	3.0158	0.401	0.049	0.000112614
PHIP	5.07274e-24	3.01165	0.798	0.148	9.21209e-20
DIP2C	1.03537e-35	3.00716	0.874	0.098	1.88023e-31
CDC14A	2.63047e-19	3.00398	0.549	0.016	4.77692e-15
NUMB	8.21932e-30	2.99984	0.872	0.18	1.49263e-25
KLHDC1	2.2548e-07	2.99852	0.354	0.049	0.00409472
NFATC3	1.60399e-09	2.99828	0.417	0.049	2.91284e-05
RASAL2	1.66814e-08	2.9972	0.416	0.066	0.000302935
VPS8	1.60143e-08	2.99518	0.39	0.049	0.00029082
COG5	2.5151e-22	2.98771	0.783	0.164	4.56743e-18
PXK	6.69252e-12	2.98769	0.479	0.049	1.21536e-07
ANKRD12	9.87149e-18	2.98446	0.597	0.049	1.79266e-13
CLSTN2	6.56799e-45	2.98376	0.965	0.344	1.19275e-40
TMEM200A	7.21551e-16	2.97534	0.672	0.131	1.31034e-11
RCOR1	5.27333e-11	2.97257	0.369	0.016	9.57637e-07
SRRM4	6.35557e-12	2.97071	0.506	0.066	1.15417e-07
ANKRD10	1.09053e-34	2.96956	0.92	0.23	1.98041e-30
JADE3	4.4772e-13	2.96565	0.416	0.016	8.1306e-09
GALNT7	3.60877e-11	2.96517	0.512	0.082	6.55352e-07
CARNMT1	3.86443e-08	2.95462	0.378	0.049	0.000701781
MPPED2	4.16122e-13	2.94844	0.532	0.066	7.55678e-09
SENP7	2.28881e-09	2.9437	0.378	0.033	4.15647e-05
TTC7A	4.38605e-11	2.94317	0.486	0.066	7.96507e-07
SLC10A7	3.62012e-17	2.94229	0.558	0.033	6.57414e-13
BOD1L1	1.15304e-14	2.93672	0.627	0.115	2.09393e-10
CDYL	1.02358e-13	2.93199	0.434	0.016	1.85881e-09
FYN	1.00509e-20	2.92991	0.612	0.033	1.82524e-16
FAM171A1	1.07745e-10	2.92634	0.36	0.016	1.95664e-06
KLF12	2.95435e-24	2.91804	0.746	0.082	5.3651e-20
FOXP1	4.25357e-19	2.91262	0.738	0.148	7.72449e-15
ADCY5	8.47325e-27	2.90397	0.729	0.049	1.53874e-22
RBFOX2	1.84352e-30	2.90373	0.892	0.23	3.34783e-26
PLXDC2	1.6455e-08	2.90164	0.417	0.066	0.000298823
LEMD3	4.46932e-08	2.90074	0.377	0.049	0.000811629
PELI1	2.01116e-06	2.89854	0.293	0.033	0.0365227
PTPN21	9.74129e-07	2.89657	0.302	0.033	0.0176902
AP1S2	5.94874e-13	2.88926	0.555	0.082	1.08029e-08
ATG2A	5.00657e-11	2.88918	0.414	0.033	9.09194e-07
TIAM2	8.27822e-13	2.88501	0.412	0.016	1.50332e-08
UBAP2	7.40842e-19	2.88075	0.642	0.066	1.34537e-14
RALGPS1	7.29265e-14	2.87888	0.549	0.066	1.32434e-09
ARHGAP21	4.86735e-19	2.87693	0.67	0.082	8.8391e-15
RBM39	3.08845e-34	2.87622	0.894	0.148	5.60862e-30
MADD	9.76341e-38	2.87287	0.937	0.213	1.77304e-33
TCF12	5.1871e-23	2.87222	0.777	0.131	9.41977e-19
CAMK4	8.84422e-16	2.86836	0.681	0.148	1.60611e-11
CPLX1	6.29037e-07	2.86352	0.31	0.033	0.0114233
TLK1	5.44589e-20	2.85776	0.763	0.164	9.88973e-16
PPP4R2	8.75278e-09	2.85764	0.31	0.016	0.000158951
MTM1	1.51579e-14	2.85435	0.447	0.016	2.75267e-10
PDE7B	1.57141e-23	2.85165	0.685	0.049	2.85368e-19
RETREG1	3.05762e-09	2.8505	0.41	0.049	5.55264e-05
GAB2	2.86264e-25	2.84885	0.776	0.098	5.19855e-21
ZFHX3	1.82959e-13	2.84878	0.512	0.049	3.32253e-09
WDFY3	3.82494e-15	2.84776	0.545	0.049	6.94609e-11
ARMC2	2.31967e-12	2.84747	0.447	0.033	4.21252e-08
SLIT3	8.42565e-45	2.83354	0.974	0.377	1.5301e-40
TRAF3IP1	6.21162e-11	2.83119	0.482	0.066	1.12803e-06
COMMD10	1.40666e-11	2.82968	0.523	0.082	2.5545e-07
PUS10	6.40265e-08	2.82734	0.371	0.049	0.00116272
SULF2	5.19269e-14	2.8264	0.553	0.066	9.42992e-10
TRPS1	2.85445e-10	2.82311	0.438	0.049	5.18369e-06
ICA1	4.67745e-20	2.82253	0.705	0.098	8.49425e-16
GRIP1	5.04317e-15	2.81088	0.655	0.131	9.15839e-11
PARG	3.86162e-07	2.80702	0.314	0.033	0.0070127
SRSF1	9.70664e-21	2.80201	0.649	0.049	1.76273e-16
NEO1	8.21201e-16	2.79559	0.635	0.098	1.4913e-11
GLRB	7.02829e-08	2.78757	0.369	0.049	0.00127634
CDKAL1	2.62117e-32	2.78657	0.846	0.098	4.76004e-28
CAMK2D	1.56589e-26	2.78433	0.805	0.115	2.84366e-22
VAV2	2.68917e-21	2.78353	0.768	0.148	4.88353e-17
COX7B	1.36208e-06	2.78311	0.358	0.066	0.0247353
FMN1	1.91481e-22	2.77914	0.74	0.098	3.47729e-18
EPB41	3.29951e-15	2.77857	0.542	0.049	5.99191e-11
APBB2	1.67267e-16	2.77657	0.647	0.098	3.03756e-12
RBMXL1	8.60746e-22	2.77369	0.688	0.066	1.56311e-17
ARNTL2	9.6987e-07	2.77102	0.299	0.033	0.0176128
OLFM3	4.958e-19	2.76678	0.577	0.033	9.00373e-15
HS6ST2	1.08924e-08	2.76301	0.356	0.033	0.000197806
STXBP5	9.50404e-16	2.76119	0.698	0.164	1.72593e-11
NT5C3A	1.20415e-11	2.76063	0.43	0.033	2.18674e-07
TCTN3	8.32238e-07	2.76011	0.338	0.049	0.0151134
LRBA	1.99894e-25	2.7571	0.848	0.213	3.63007e-21
SBF2	1.10415e-26	2.75509	0.792	0.098	2.00514e-22
GRIK1	2.3082e-10	2.75277	0.631	0.23	4.19169e-06
WWP1	1.6578e-10	2.75021	0.471	0.066	3.01056e-06
DPH6	1.25889e-19	2.74983	0.677	0.082	2.28615e-15
S1PR1	2.88059e-12	2.73415	0.443	0.033	5.23115e-08
BTRC	1.46561e-07	2.73136	0.414	0.082	0.00266155
MAP4K3	1.42027e-14	2.72974	0.56	0.066	2.57921e-10
PLD5	8.28178e-17	2.7283	0.532	0.033	1.50397e-12
DYNC1I1	3.11352e-35	2.72784	0.941	0.279	5.65416e-31
TLN2	8.85968e-18	2.72644	0.623	0.066	1.60892e-13
MPHOSPH10	1.60989e-06	2.72489	0.328	0.049	0.0292356
PRRX1	1.20873e-06	2.7239	0.332	0.049	0.0219505
SRSF11	1.01482e-23	2.72112	0.757	0.098	1.84291e-19
NLGN3	3.81822e-09	2.71743	0.312	0.016	6.93388e-05
ST7	4.12636e-21	2.71733	0.672	0.066	7.49347e-17
HOXB6	7.49395e-25	2.7102	0.787	0.115	1.3609e-20
ATXN7L1	1.78361e-12	2.70938	0.566	0.098	3.23903e-08
ZFHX4	1.49665e-26	2.7063	0.855	0.197	2.71792e-22
MITF	6.79541e-17	2.70177	0.551	0.033	1.23405e-12
IQCE	1.36115e-07	2.69998	0.362	0.049	0.00247185
PPP3CA	3.8509e-27	2.69615	0.874	0.213	6.99324e-23
EFR3B	3.22212e-12	2.69446	0.486	0.049	5.85137e-08
MLLT10	1.85827e-26	2.69253	0.788	0.098	3.37462e-22
SLC6A15	5.46667e-08	2.69058	0.332	0.033	0.000992747
KDM6A	4.26691e-25	2.68793	0.803	0.131	7.74872e-21
FBRSL1	1.7236e-36	2.6854	0.891	0.115	3.13007e-32
TIMP4	1.51488e-12	2.68343	0.545	0.082	2.75103e-08
RAI2	4.12715e-17	2.67256	0.61	0.066	7.49491e-13
PKNOX1	1.40764e-09	2.67113	0.447	0.066	2.55628e-05
DPF3	6.29613e-15	2.66926	0.596	0.082	1.14338e-10
MDGA1	1.87311e-10	2.66481	0.518	0.098	3.40156e-06
TNRC6C	1.49194e-20	2.66012	0.748	0.131	2.70936e-16
LCLAT1	6.31539e-11	2.65863	0.506	0.082	1.14687e-06
HIPK2	1.74932e-21	2.65751	0.785	0.164	3.17677e-17
SLC16A10	2.74323e-07	2.65451	0.267	0.016	0.00498171
MED13L	6.22737e-20	2.65299	0.738	0.131	1.13089e-15
CCDC66	4.36394e-07	2.6481	0.345	0.049	0.00792492
TEF	8.28732e-10	2.64648	0.479	0.082	1.50498e-05
ATAD2B	2.09492e-21	2.64599	0.725	0.098	3.80438e-17
MTSS1	3.951e-26	2.64549	0.887	0.262	7.17501e-22
SLAIN1	4.62417e-08	2.64519	0.404	0.066	0.000839749
CACNA1H	5.4874e-10	2.6423	0.456	0.066	9.96511e-06
INO80	1.05427e-09	2.63524	0.417	0.049	1.91456e-05
EFNA5	1.02695e-09	2.63497	0.451	0.066	1.86494e-05
HNRNPM	2.1474e-09	2.63392	0.488	0.098	3.89969e-05
RALGAPA1	1.51585e-19	2.6284	0.761	0.164	2.75279e-15
ACTN1	4.41602e-25	2.62784	0.865	0.23	8.01949e-21
NT5C2	2.21102e-11	2.62184	0.542	0.098	4.01521e-07
ERCC6	7.7791e-08	2.61704	0.365	0.049	0.00141268
RSRC1	1.99072e-15	2.61553	0.575	0.066	3.61515e-11
FBXO34	4.51182e-12	2.61053	0.473	0.049	8.19346e-08
PTPRD	4.8475e-17	2.60728	0.657	0.098	8.80307e-13
MAP7D3	2.46224e-19	2.60472	0.61	0.049	4.47143e-15
TTC14	3.93572e-12	2.60362	0.536	0.082	7.14726e-08
HYKK	2.25779e-06	2.6009	0.286	0.033	0.0410015
GPCPD1	9.38319e-19	2.59707	0.722	0.131	1.70399e-14
KCNQ2	1.91359e-35	2.59561	0.942	0.262	3.47509e-31
ZBTB16	1.21555e-15	2.59483	0.685	0.148	2.20744e-11
PCLO	1.01577e-48	2.59214	0.983	0.41	1.84465e-44
NPC1	5.29575e-14	2.58693	0.62	0.115	9.61708e-10
TMEM241	2.58966e-06	2.58617	0.282	0.033	0.0470283
PSMB7	1.33853e-09	2.58393	0.473	0.082	2.43078e-05
APOO	6.55824e-08	2.58247	0.334	0.033	0.00119098
FRYL	1.0091e-15	2.58223	0.653	0.115	1.83252e-11
CEP85L	7.36599e-07	2.58086	0.338	0.049	0.0133766
BUD13	6.22254e-07	2.57822	0.304	0.033	0.0113001
CUX1	4.55664e-28	2.57534	0.842	0.148	8.27485e-24
ATRNL1	4.09996e-39	2.57473	0.968	0.344	7.44553e-35
SLC38A1	1.88238e-12	2.57443	0.542	0.082	3.4184e-08
PTPRR	1.91319e-27	2.57423	0.814	0.115	3.47436e-23
CASK	3.02123e-25	2.56651	0.827	0.164	5.48656e-21
RBMS1	2.24819e-19	2.5644	0.692	0.098	4.08272e-15
RAP1GDS1	2.1414e-23	2.56292	0.75	0.098	3.88878e-19
GPR85	2.93672e-07	2.56266	0.31	0.033	0.00533308
TFAP2B	3.31922e-18	2.56071	0.653	0.082	6.0277e-14
EVI5	1.16517e-24	2.55975	0.813	0.148	2.11595e-20
PAN3	3.4241e-18	2.55752	0.653	0.082	6.21817e-14
MPDZ	8.79916e-10	2.55632	0.451	0.066	1.59793e-05
PCDH9	1.46248e-09	2.54875	0.56	0.164	2.65587e-05
TRANK1	4.00996e-09	2.54566	0.46	0.082	7.28209e-05
TMEFF2	1.98858e-12	2.5416	0.512	0.066	3.61125e-08
CDC40	1.39862e-06	2.53335	0.289	0.033	0.0253989
MAP7	8.35367e-27	2.53273	0.881	0.23	1.51703e-22
ATP11A	2.57644e-08	2.53153	0.438	0.082	0.000467881
SMCHD1	2.25871e-16	2.52542	0.531	0.033	4.10182e-12
PPIA	1.52579e-19	2.52014	0.651	0.066	2.77084e-15
PIK3CB	1.07967e-10	2.52001	0.434	0.049	1.96069e-06
AHR	6.75681e-22	2.51785	0.705	0.082	1.22704e-17
ATG5	5.86119e-12	2.5177	0.468	0.049	1.06439e-07
ARMC8	1.04894e-07	2.51224	0.393	0.066	0.00190487
GPATCH2	5.24636e-11	2.50856	0.482	0.066	9.5274e-07
ADGRL3	7.09116e-13	2.50446	0.523	0.066	1.28775e-08
TSPAN13	2.45493e-19	2.49858	0.746	0.148	4.45816e-15
CRPPA	1.90828e-06	2.49584	0.354	0.066	0.0346544
R3HDM1	4.28e-19	2.49556	0.67	0.082	7.77247e-15
FNIP2	3.36258e-12	2.49519	0.508	0.066	6.10644e-08
GLCCI1	1.41778e-19	2.49036	0.75	0.148	2.57468e-15
FOXN3	3.24998e-28	2.48939	0.848	0.148	5.90196e-24
PHKA2	2.84554e-12	2.48498	0.581	0.115	5.1675e-08
POU2F1	1.44468e-07	2.48462	0.414	0.082	0.00262354
TET2	2.22949e-08	2.48461	0.44	0.082	0.000404876
HECW2	1.06752e-07	2.48432	0.393	0.066	0.00193862
NSMCE2	4.44874e-07	2.48202	0.341	0.049	0.00807891
TSPAN5	6.97417e-10	2.47129	0.332	0.016	1.26651e-05
SPTBN1	2.30007e-40	2.45882	0.976	0.344	4.17693e-36
ZC3H3	1.19229e-08	2.45244	0.471	0.098	0.00021652
SKAP2	1.32963e-11	2.44764	0.521	0.082	2.41461e-07
PER2	1.81827e-08	2.44646	0.388	0.049	0.000330198
SLC25A13	1.29586e-16	2.44025	0.553	0.049	2.35328e-12
FILIP1	1.63818e-08	2.43816	0.34	0.033	0.000297494
BBX	5.5761e-20	2.4246	0.768	0.164	1.01262e-15
RAPGEF5	7.55095e-11	2.42111	0.438	0.049	1.37125e-06
SLC9A8	3.57469e-15	2.42085	0.601	0.082	6.49164e-11
MEIS1	9.51137e-32	2.4186	0.937	0.295	1.72727e-27
ATXN7	4.7635e-09	2.41151	0.304	0.016	8.65052e-05
SMURF2	3.60961e-11	2.40623	0.419	0.033	6.55505e-07
RIPOR3	5.05694e-08	2.40516	0.375	0.049	0.000918339
GREB1L	1.05389e-11	2.39672	0.495	0.066	1.91386e-07
ARFGEF1	6.35464e-17	2.39366	0.735	0.18	1.154e-12
ZDHHC8	2.96048e-14	2.37898	0.662	0.148	5.37623e-10
NFYB	2.73748e-07	2.37478	0.304	0.033	0.00497127
ANKS1B	1.78178e-09	2.36589	0.469	0.082	3.23572e-05
MICU3	7.29984e-20	2.36557	0.718	0.115	1.32565e-15
CALM1	9.71992e-14	2.36044	0.594	0.098	1.76514e-09
C2CD5	1.04949e-15	2.35899	0.672	0.131	1.90588e-11
TOX3	8.40134e-11	2.34353	0.443	0.049	1.52568e-06
NALCN	5.13211e-20	2.34294	0.783	0.18	9.31992e-16
CA2	2.86335e-13	2.3349	0.49	0.049	5.19984e-09
PAICS	2.71692e-08	2.33353	0.369	0.049	0.000493393
MAML3	1.55231e-25	2.33344	0.857	0.197	2.819e-21
TBC1D8	2.23959e-07	2.32956	0.41	0.082	0.0040671
RELCH	5.51008e-13	2.32899	0.597	0.115	1.00063e-08
CNOT4	2.64403e-08	2.32408	0.462	0.098	0.000480156
SCFD2	1.612e-09	2.32067	0.518	0.115	2.92739e-05
BIRC6	5.36526e-22	2.31674	0.709	0.082	9.74332e-18
PIP4K2A	3.3712e-08	2.31488	0.332	0.033	0.00061221
KLHL34	7.21134e-12	2.31148	0.369	0.016	1.30958e-07
GTDC1	3.22842e-12	2.31143	0.536	0.082	5.86282e-08
TLL1	3.4504e-07	2.31116	0.349	0.049	0.00626592
H3F3B	1.65902e-10	2.30948	0.429	0.049	3.01277e-06
ZNF593	5.63911e-07	2.3092	0.338	0.049	0.0102406
GLS2	1.18777e-07	2.30719	0.362	0.049	0.00215699
ZNF644	5.0485e-16	2.30348	0.677	0.131	9.16808e-12
MPND	6.86106e-07	2.29659	0.301	0.033	0.0124597
NGEF	6.61925e-07	2.29267	0.293	0.033	0.0120206
TNS3	9.14039e-16	2.29023	0.633	0.098	1.65989e-11
PHF14	7.01504e-24	2.29006	0.803	0.148	1.27393e-19
DOCK9	9.73819e-30	2.2874	0.805	0.082	1.76846e-25
VPS50	4.5198e-10	2.28636	0.482	0.082	8.20796e-06
RBM26	1.68605e-17	2.28584	0.683	0.115	3.06187e-13
BAZ2B	1.11332e-19	2.28437	0.792	0.197	2.02179e-15
BCL7A	1.54718e-06	2.28006	0.356	0.066	0.0280968
EPN2	2.65909e-15	2.27621	0.57	0.066	4.82891e-11
DMXL2	6.77554e-12	2.27438	0.529	0.082	1.23044e-07
PACS2	5.99063e-10	2.27374	0.506	0.098	1.0879e-05
AGRN	4.34356e-09	2.26866	0.399	0.049	7.88791e-05
ARID2	3.07589e-20	2.26717	0.707	0.098	5.58581e-16
BRF1	3.35422e-11	2.26684	0.616	0.164	6.09127e-07
SRSF10	6.00314e-08	2.2661	0.262	0.016	0.00109017
VPS13B	1.83261e-16	2.26496	0.746	0.197	3.32802e-12
DIDO1	1.11391e-13	2.26355	0.612	0.115	2.02285e-09
WDR70	3.98401e-07	2.2534	0.336	0.049	0.00723496
JAKMIP2	4.44248e-09	2.2509	0.456	0.082	8.06754e-05
PSPC1	7.49315e-23	2.24905	0.777	0.131	1.36076e-18
TAMM41	2.25017e-11	2.24771	0.401	0.033	4.08631e-07
DLGAP4	2.15478e-20	2.24498	0.788	0.18	3.91309e-16
TLE1	1.17558e-16	2.23273	0.722	0.164	2.13485e-12
ZNF407	1.79706e-18	2.23196	0.748	0.164	3.26345e-14
CSPP1	1.40432e-06	2.22456	0.356	0.066	0.0255025
RPAP3	1.66489e-07	2.2188	0.351	0.049	0.00302344
ANKH	3.69666e-19	2.2137	0.82	0.246	6.71313e-15
PIAS1	2.14676e-09	2.21287	0.49	0.098	3.89851e-05
ZDHHC20	1.15651e-09	2.21046	0.521	0.115	2.10022e-05
ZCCHC2	1.16135e-14	2.20756	0.558	0.066	2.10902e-10
CSNK1D	2.38826e-17	2.20464	0.699	0.131	4.33709e-13
HOOK3	4.68319e-09	2.20444	0.482	0.098	8.50467e-05
RALGAPA2	9.95498e-08	2.20441	0.417	0.082	0.00180782
LDAH	1.49219e-12	2.20037	0.564	0.098	2.70982e-08
ADCY1	3.47355e-12	2.19787	0.506	0.066	6.30796e-08
FOXK2	3.42732e-12	2.19699	0.555	0.098	6.22401e-08
ADCY3	2.00352e-18	2.19644	0.508	0.016	3.6384e-14
CASZ1	2.2668e-09	2.19587	0.49	0.098	4.1165e-05
KDM4B	4.53293e-13	2.19176	0.601	0.115	8.23181e-09
PDE4D	2.45601e-19	2.18753	0.616	0.049	4.46011e-15
CCDC91	2.74782e-19	2.18517	0.776	0.18	4.99004e-15
DNAJC12	1.01166e-06	2.18367	0.388	0.082	0.0183717
METTL25	5.48348e-14	2.17862	0.571	0.082	9.958e-10
ABLIM3	1.67052e-13	2.17666	0.494	0.049	3.03366e-09
RCOR3	1.00452e-08	2.17498	0.414	0.066	0.00018242
ZNF518B	5.78605e-09	2.17302	0.423	0.066	0.000105075
FAM184A	7.90684e-13	2.17291	0.547	0.082	1.43588e-08
RNF150	5.33759e-12	2.17068	0.636	0.164	9.69306e-08
SLC16A7	1.21395e-14	2.16701	0.627	0.115	2.20454e-10
VWF	8.81397e-11	2.16664	0.388	0.033	1.60062e-06
RB1	2.27863e-11	2.16477	0.451	0.049	4.13799e-07
CPNE2	4.46266e-08	2.15687	0.401	0.066	0.000810419
CHCHD3	5.69208e-12	2.15673	0.635	0.164	1.03368e-07
TIA1	3.03456e-11	2.15496	0.56	0.115	5.51076e-07
ADNP	2.70223e-19	2.15094	0.761	0.164	4.90726e-15
APOOL	1.54086e-07	2.14562	0.304	0.033	0.0027982
PPP2R2D	8.10699e-07	2.14348	0.36	0.066	0.0147223
MAP3K20	1.00935e-10	2.14319	0.494	0.082	1.83298e-06
BZW2	3.92479e-08	2.14222	0.327	0.033	0.000712742
SON	3.04141e-21	2.14007	0.787	0.164	5.5232e-17
RAD23B	5.70439e-13	2.13526	0.57	0.098	1.03592e-08
FAM133B	1.86297e-09	2.13472	0.393	0.049	3.38315e-05
SFPQ	3.88662e-11	2.13328	0.597	0.148	7.05811e-07
SPAST	2.51115e-06	2.12577	0.267	0.033	0.0456025
EEF2K	2.1675e-12	2.12188	0.471	0.049	3.93618e-08
KCTD16	1.61101e-10	2.12142	0.469	0.066	2.9256e-06
APBA2	1.51608e-09	2.11864	0.369	0.033	2.7532e-05
FAM219A	8.48932e-11	2.11627	0.527	0.098	1.54166e-06
AKAP6	2.14637e-27	2.11552	0.913	0.344	3.89782e-23
FCHO2	8.0204e-07	2.11508	0.323	0.049	0.014565
RAB11FIP4	2.95441e-08	2.11316	0.404	0.066	0.000536521
PCP4	1.57663e-11	2.10119	0.659	0.197	2.86316e-07
ELP4	7.81583e-17	2.10072	0.549	0.049	1.41935e-12
ASCC3	6.83479e-09	2.09845	0.453	0.082	0.00012412
TNRC6B	7.93564e-18	2.09521	0.753	0.18	1.44111e-13
KDM2B	8.14252e-18	2.09356	0.707	0.131	1.47868e-13
WWOX	5.40034e-17	2.09233	0.757	0.197	9.80702e-13
H2AFY	9.58259e-08	2.08493	0.49	0.131	0.0017402
IQCK	4.43035e-09	2.08232	0.295	0.016	8.04551e-05
SLC2A13	3.34852e-10	2.08033	0.512	0.098	6.08092e-06
RFTN1	3.6813e-17	2.07785	0.618	0.082	6.68525e-13
USP10	2.93483e-09	2.07381	0.391	0.049	5.32965e-05
OGT	1.55536e-25	2.07356	0.885	0.246	2.82454e-21
PHF21A	5.34127e-16	2.07039	0.694	0.148	9.69975e-12
CABIN1	3.8253e-07	2.06879	0.403	0.082	0.00694674
MEF2C	4.13831e-15	2.06631	0.586	0.082	7.51518e-11
OSBPL10	1.9214e-07	2.0642	0.31	0.033	0.00348926
CCDC149	2.87865e-08	2.06159	0.336	0.033	0.000522763
CEP290	2.40482e-10	2.05624	0.421	0.049	4.36716e-06
PRPF39	1.2965e-06	2.055	0.353	0.066	0.0235445
TENM1	3.06668e-10	2.05469	0.534	0.115	5.56909e-06
HNRNPDL	8.65698e-17	2.0542	0.763	0.213	1.57211e-12
HERC2	1.50776e-15	2.05291	0.72	0.18	2.73809e-11
TTBK1	1.05487e-11	2.04554	0.588	0.131	1.91565e-07
CRY2	2.6743e-13	2.04484	0.549	0.082	4.85653e-09
FMR1	1.31869e-09	2.04177	0.562	0.148	2.39474e-05
PLEKHA5	8.4466e-17	2.04054	0.811	0.279	1.5339e-12
ZEB1	1.20496e-16	2.03635	0.737	0.18	2.18821e-12
FHOD3	2.00228e-22	2.03613	0.891	0.311	3.63614e-18
SGCD	2.50572e-09	2.0342	0.49	0.098	4.55038e-05
BCL9	1.67865e-09	2.02435	0.31	0.016	3.04844e-05
NOVA1	3.17616e-08	2.016	0.406	0.066	0.00057679
KPNA5	1.32288e-08	2.01585	0.276	0.016	0.000240235
CEP170	8.89361e-11	2.01278	0.495	0.082	1.61508e-06
UPF3B	7.64881e-09	2.01263	0.373	0.049	0.000138902
PRICKLE2	8.83597e-10	2.01076	0.499	0.098	1.60461e-05
OSBPL1A	2.8013e-08	2.00625	0.362	0.049	0.000508716
SLC35D3	1.18499e-13	2.00427	0.518	0.066	2.15195e-09
ZBED1	2.66257e-08	2.00156	0.275	0.016	0.000483523
RNF152	4.33402e-12	1.99732	0.49	0.066	7.87059e-08
EML1	2.86014e-09	1.99721	0.403	0.049	5.19401e-05
TDRD3	6.11814e-12	1.99149	0.529	0.082	1.11105e-07
LRCH1	4.73559e-13	1.98972	0.508	0.066	8.59983e-09
AGTPBP1	5.99926e-09	1.98866	0.503	0.115	0.000108947
EXOC4	2.48392e-21	1.98811	0.826	0.213	4.5108e-17
PACSIN2	2.28244e-11	1.98798	0.558	0.115	4.14491e-07
CCDC6	6.22355e-11	1.98756	0.549	0.115	1.1302e-06
ERC1	7.07704e-15	1.98724	0.692	0.164	1.28519e-10
MTMR1	9.67788e-10	1.98688	0.397	0.049	1.7575e-05
HLCS	8.85038e-09	1.98606	0.519	0.131	0.000160723
ZFC3H1	1.40748e-14	1.98566	0.686	0.164	2.55598e-10
MARK3	1.11256e-12	1.98002	0.61	0.131	2.02041e-08
CEP164	7.75522e-12	1.97963	0.41	0.033	1.40835e-07
GDPD5	1.42186e-06	1.97695	0.475	0.148	0.025821
ITSN1	1.37934e-16	1.97664	0.683	0.131	2.50489e-12
CPEB3	1.99168e-12	1.97436	0.603	0.131	3.61689e-08
RAP1GAP2	4.09838e-13	1.96972	0.675	0.18	7.44266e-09
TGFBR1	7.13291e-18	1.96578	0.651	0.098	1.29534e-13
KIAA0408	6.68235e-20	1.96402	0.629	0.066	1.21352e-15
ANK2	1.22055e-25	1.96386	0.902	0.279	2.21652e-21
DENND6B	1.22504e-09	1.96321	0.297	0.016	2.22466e-05
KIAA0232	3.44968e-13	1.96306	0.601	0.115	6.26462e-09
CRIM1	6.98847e-12	1.95388	0.571	0.115	1.26911e-07
TTC7B	1.27731e-10	1.94776	0.566	0.131	2.31959e-06
BRD1	6.51912e-14	1.94445	0.707	0.197	1.18387e-09
FBXO11	1.29062e-12	1.94435	0.536	0.082	2.34377e-08
ERBIN	1.66014e-10	1.94058	0.512	0.098	3.01481e-06
BMPER	5.45378e-09	1.9397	0.388	0.049	9.90407e-05
KIAA2026	1.41576e-11	1.93307	0.609	0.148	2.57103e-07
PNPLA3	3.30419e-10	1.93174	0.317	0.016	6.00041e-06
BASP1	2.52773e-15	1.9227	0.683	0.148	4.59036e-11
MAPT	1.32815e-22	1.92266	0.75	0.115	2.41193e-18
IFT27	2.04854e-06	1.92188	0.345	0.066	0.0372015
RPH3AL	1.21706e-07	1.92087	0.384	0.066	0.00221017
PAG1	6.31315e-11	1.92034	0.629	0.18	1.14647e-06
CCNL1	1.63825e-08	1.92011	0.512	0.131	0.000297506
CNOT7	1.69257e-06	1.91969	0.314	0.049	0.030737
DGKE	1.21201e-07	1.91575	0.345	0.049	0.00220101
DAPK1	3.44616e-11	1.91002	0.579	0.131	6.25823e-07
MICU2	1.67657e-11	1.90524	0.644	0.18	3.04465e-07
EEFSEC	4.30492e-07	1.90346	0.365	0.066	0.00781773
KCTD1	1.89452e-08	1.89972	0.436	0.082	0.000344045
GTF2F2	1.45995e-06	1.89291	0.345	0.066	0.0265126
NSMAF	1.85222e-07	1.89065	0.378	0.066	0.00336364
RIMKLB	7.17208e-09	1.88539	0.41	0.066	0.000130245
MTUS1	1.11772e-17	1.88502	0.751	0.18	2.02978e-13
STMN2	2.10956e-26	1.88308	0.898	0.262	3.83097e-22
HSD17B12	6.54591e-15	1.88287	0.651	0.131	1.18874e-10
AKAP9	1.33735e-21	1.87739	0.883	0.311	2.42864e-17
SLC8A1	3.28557e-15	1.87738	0.657	0.131	5.9666e-11
TIAL1	2.16893e-10	1.8764	0.557	0.131	3.93878e-06
NME7	1.49672e-06	1.87519	0.455	0.131	0.0271805
EHBP1	2.00333e-13	1.87408	0.664	0.164	3.63805e-09
AUH	6.59257e-09	1.87161	0.564	0.164	0.000119721
UBE2Q2	3.3087e-11	1.86977	0.553	0.115	6.0086e-07
EP400	4.91186e-08	1.86869	0.252	0.016	0.000891994
ADGRL2	2.12486e-15	1.86518	0.748	0.213	3.85875e-11
RBBP6	2.65806e-12	1.86488	0.622	0.148	4.82703e-08
PCNX2	2.72059e-15	1.8605	0.681	0.148	4.94059e-11
ST8SIA1	1.53636e-06	1.85914	0.377	0.082	0.0279004
GAB1	6.8969e-07	1.85854	0.327	0.049	0.0125248
PCDHGC3	1.09198e-07	1.8585	0.464	0.115	0.00198304
SH3D19	7.77943e-14	1.8583	0.584	0.098	1.41274e-09
ZMYND11	1.15173e-19	1.8534	0.794	0.197	2.09154e-15
LSAMP	2.18765e-16	1.85187	0.829	0.311	3.97277e-12
ANKIB1	2.37864e-08	1.84964	0.41	0.066	0.000431961
CNOT6	3.69658e-09	1.84926	0.327	0.033	6.71298e-05
KIAA0586	2.68144e-07	1.84874	0.33	0.049	0.0048695
KAT2B	1.30989e-08	1.84707	0.364	0.049	0.000237876
SF3B1	1.7356e-13	1.84608	0.575	0.098	3.15185e-09
SH3RF1	5.46498e-08	1.83633	0.356	0.049	0.00099244
KIF16B	5.61736e-19	1.83519	0.807	0.23	1.02011e-14
SH3KBP1	2.32152e-07	1.82937	0.406	0.082	0.00421589
GRAMD4	3.57996e-09	1.8279	0.447	0.082	6.50121e-05
NBAS	6.26573e-18	1.82717	0.753	0.18	1.13786e-13
TENM3	2.96134e-11	1.82518	0.725	0.279	5.37779e-07
SEMA6D	3.42835e-07	1.82518	0.399	0.082	0.00622589
REV3L	2.13944e-13	1.82458	0.583	0.098	3.88522e-09
DIP2A	8.00111e-09	1.8241	0.464	0.098	0.0001453
QKI	8.28152e-16	1.82261	0.768	0.23	1.50392e-11
NRIP3	1.40276e-16	1.82162	0.751	0.197	2.54742e-12
CCNY	1.61991e-10	1.82035	0.564	0.131	2.94176e-06
CADPS	1.4792e-29	1.81318	0.974	0.459	2.68623e-25
PDSS2	5.73979e-11	1.81064	0.488	0.082	1.04235e-06
RBM5	4.51783e-24	1.80759	0.92	0.361	8.20438e-20
SNX13	1.43094e-06	1.80531	0.43	0.115	0.0259859
CD47	1.04841e-16	1.8008	0.733	0.18	1.90392e-12
VPS13D	1.12971e-06	1.79524	0.41	0.098	0.0205155
TMEM135	9.04849e-08	1.79407	0.421	0.082	0.00164321
AMIGO2	4.73429e-14	1.79262	0.672	0.164	8.59747e-10
STK3	9.00376e-09	1.79241	0.403	0.066	0.000163508
CPEB2	1.54358e-11	1.7892	0.56	0.115	2.80314e-07
TBX2	1.71304e-07	1.78829	0.41	0.082	0.00311089
SEMA4D	2.69282e-10	1.78799	0.44	0.066	4.89016e-06
TEAD1	3.10736e-13	1.78649	0.677	0.18	5.64297e-09
FAM207A	5.72748e-07	1.78512	0.332	0.049	0.0104011
PRDM11	2.40338e-07	1.78086	0.289	0.033	0.00436455
ATP6V0C	7.08162e-07	1.78025	0.384	0.082	0.0128602
PCBP3	4.1881e-12	1.77787	0.571	0.115	7.60559e-08
PPP1R12A	3.94073e-14	1.77535	0.694	0.18	7.15636e-10
MEF2A	4.89857e-10	1.76812	0.592	0.164	8.89581e-06
TTLL7	1.70176e-15	1.7674	0.718	0.18	3.09039e-11
CHKA	1.83992e-07	1.76584	0.369	0.066	0.00334129
PHF20	1.19207e-10	1.75911	0.417	0.049	2.1648e-06
WDR7	4.69917e-08	1.75827	0.351	0.049	0.00085337
NGFR	9.40791e-07	1.75587	0.328	0.049	0.0170848
PLXND1	6.19894e-10	1.75463	0.494	0.098	1.12573e-05
TUB	2.30103e-10	1.75382	0.668	0.23	4.17866e-06
THNSL1	5.82202e-09	1.75237	0.325	0.033	0.000105728
ETV6	8.30833e-09	1.74918	0.436	0.082	0.000150879
TJP1	1.54693e-13	1.7379	0.683	0.18	2.80923e-09
CSRNP3	1.27101e-09	1.73739	0.495	0.098	2.30815e-05
DDX3X	3.94403e-22	1.72936	0.881	0.295	7.16236e-18
GNE	1.97306e-06	1.72878	0.304	0.049	0.0358308
MYT1	3.69334e-08	1.7257	0.521	0.148	0.000670711
GNPTAB	2.59436e-12	1.72267	0.523	0.082	4.71135e-08
RECK	1.3964e-06	1.72098	0.384	0.082	0.0253587
FAM107B	1.63846e-12	1.71446	0.698	0.213	2.97545e-08
TCERG1	1.06142e-15	1.71359	0.737	0.197	1.92754e-11
EFNB2	6.90545e-07	1.71076	0.314	0.049	0.0125403
ZNF516	4.06445e-09	1.70771	0.406	0.066	7.38104e-05
PPIB	2.48033e-11	1.70706	0.575	0.131	4.50428e-07
NFIA	6.16844e-09	1.70686	0.653	0.246	0.000112019
MIB1	2.56143e-07	1.70509	0.314	0.049	0.00465155
DOP1A	4.67383e-12	1.70455	0.434	0.049	8.48767e-08
MAPK8	3.25788e-07	1.69855	0.334	0.049	0.00591632
ANKRD28	5.10952e-10	1.69816	0.427	0.066	9.27888e-06
MIPOL1	2.42414e-08	1.69761	0.421	0.082	0.000440224
EPAS1	7.33606e-17	1.69736	0.809	0.262	1.33223e-12
THOC2	3.09338e-19	1.69696	0.722	0.131	5.61759e-15
AFDN	2.53089e-12	1.6881	0.616	0.148	4.59609e-08
ENPP6	5.20073e-10	1.6845	0.34	0.033	9.44453e-06
PHF2	7.40013e-09	1.68414	0.494	0.115	0.000134386
STOX2	1.90813e-06	1.68104	0.399	0.098	0.0346517
DYNC1H1	6.34385e-12	1.67663	0.67	0.197	1.15204e-07
FAM20C	1.40282e-14	1.67575	0.686	0.164	2.54752e-10
HSP90AA1	2.30972e-23	1.67076	0.972	0.59	4.19445e-19
NKTR	3.50295e-21	1.67003	0.835	0.23	6.36135e-17
THRAP3	3.51195e-12	1.66907	0.657	0.18	6.37769e-08
ARHGAP12	2.69121e-11	1.66584	0.657	0.197	4.88724e-07
RAPGEF4	1.81281e-15	1.66239	0.694	0.164	3.29206e-11
PLOD2	1.9893e-12	1.66099	0.56	0.115	3.61256e-08
SPEN	6.25402e-10	1.65993	0.519	0.115	1.13573e-05
RBM23	1.69563e-21	1.65965	0.894	0.328	3.07927e-17
USP15	5.09729e-09	1.65916	0.494	0.115	9.25668e-05
EHMT1	1.69473e-12	1.65892	0.599	0.131	3.07764e-08
BRAF	1.14414e-09	1.65789	0.455	0.082	2.07776e-05
PLCL2	1.25766e-06	1.65582	0.43	0.115	0.0228391
RFX3	1.81054e-12	1.65277	0.573	0.115	3.28795e-08
APPL1	8.30398e-07	1.65256	0.416	0.098	0.01508
MSI2	3.34517e-18	1.6494	0.891	0.393	6.07484e-14
RSBN1L	2.22008e-10	1.64861	0.462	0.082	4.03166e-06
PPP2R5E	6.94063e-08	1.64586	0.536	0.164	0.00126042
LARP1B	1.64535e-07	1.64424	0.356	0.066	0.00298795
PAXBP1	2.67809e-15	1.64006	0.622	0.115	4.86341e-11
KMT2E	3.1574e-23	1.63456	0.788	0.148	5.73383e-19
EED	1.08507e-08	1.63041	0.384	0.066	0.00019705
TTC39B	8.23096e-11	1.62378	0.404	0.049	1.49474e-06
SLC25A16	7.77488e-09	1.62271	0.455	0.098	0.000141192
PKD1	2.33114e-13	1.61913	0.711	0.213	4.23335e-09
STK26	4.60521e-07	1.61614	0.276	0.033	0.00836307
NT5DC1	3.06944e-07	1.61607	0.497	0.148	0.00557411
IDE	6.40222e-12	1.60867	0.399	0.033	1.16264e-07
2024-03-04	8.96925e-07	1.60849	0.351	0.066	0.0162882
DST	4.08522e-24	1.60477	0.952	0.443	7.41876e-20
SEMA6A	6.24349e-11	1.59853	0.629	0.18	1.13382e-06
TMEM131	2.76076e-07	1.59831	0.475	0.131	0.00501355
HERC1	6.95513e-09	1.59246	0.46	0.098	0.000126305
PAPOLA	2.09615e-11	1.59169	0.603	0.148	3.80662e-07
AP3B1	2.18589e-06	1.58024	0.317	0.049	0.0396958
DPYD	2.75217e-15	1.57938	0.787	0.262	4.99794e-11
ZNF280D	1.55496e-09	1.57897	0.438	0.082	2.8238e-05
ST3GAL3	1.63589e-08	1.57505	0.455	0.098	0.000297078
DDX46	1.60231e-12	1.56775	0.681	0.197	2.90979e-08
ARHGEF7	1.55755e-08	1.56511	0.481	0.115	0.000282851
PTPRS	1.234e-23	1.56343	0.965	0.525	2.24094e-19
RAMP2	1.37152e-06	1.56313	0.25	0.033	0.0249067
ARFGEF3	9.11391e-09	1.56153	0.56	0.164	0.000165509
ZC3H13	3.4128e-09	1.55477	0.566	0.164	6.19765e-05
XKR6	1.81176e-07	1.55384	0.443	0.115	0.00329016
RBM25	3.16619e-09	1.55377	0.627	0.213	5.74979e-05
CPT1A	2.22782e-07	1.549	0.395	0.082	0.00404572
SCN8A	5.86916e-07	1.54766	0.408	0.098	0.0106584
USP54	1.2501e-08	1.54621	0.395	0.066	0.000227018
IFT81	2.19975e-07	1.54567	0.378	0.082	0.00399474
NME1	2.78739e-10	1.54563	0.523	0.115	5.0619e-06
EXOC6	1.52677e-07	1.54054	0.479	0.131	0.00277262
CNOT2	1.92423e-08	1.54027	0.549	0.164	0.00034944
SLC18A2	3.49779e-10	1.53962	0.666	0.23	6.35199e-06
NPY	8.13492e-17	1.53944	0.67	0.131	1.4773e-12
YTHDC1	5.73027e-18	1.539	0.798	0.23	1.04062e-13
ZBTB21	5.04735e-09	1.53899	0.263	0.016	9.16598e-05
SLC24A2	1.14993e-07	1.53682	0.622	0.246	0.00208827
REV1	1.60785e-11	1.53332	0.64	0.18	2.91986e-07
GABRB3	1.92291e-10	1.53246	0.703	0.262	3.492e-06
MRTFB	2.38546e-10	1.53224	0.516	0.115	4.33199e-06
FAM49B	1.38771e-07	1.5321	0.453	0.115	0.00252008
ATP9B	1.14602e-15	1.53174	0.735	0.197	2.08117e-11
SGSM2	1.14722e-07	1.5292	0.451	0.115	0.00208336
MICAL3	8.80994e-10	1.5269	0.605	0.18	1.59988e-05
CADPS2	1.35292e-09	1.52507	0.534	0.131	2.4569e-05
CLOCK	6.91758e-07	1.52499	0.377	0.082	0.0125623
TRIO	1.77596e-15	1.52447	0.855	0.361	3.22514e-11
HNRNPR	3.85767e-07	1.52445	0.443	0.115	0.00700553
FBXL2	1.48748e-10	1.52397	0.583	0.148	2.70126e-06
KCNB1	4.7994e-22	1.52265	0.746	0.131	8.71572e-18
ETNK1	5.65339e-18	1.51971	0.822	0.262	1.02665e-13
LBH	6.80436e-11	1.51911	0.506	0.098	1.23567e-06
CCDC88A	7.85289e-16	1.51871	0.647	0.131	1.42609e-11
ANKRD26	5.52427e-08	1.51742	0.46	0.115	0.00100321
SLC25A12	6.00634e-08	1.517	0.538	0.164	0.00109075
SFSWAP	1.25041e-10	1.51641	0.597	0.164	2.27074e-06
EXOC2	3.42059e-11	1.51571	0.568	0.131	6.21179e-07
GALNT1	5.36155e-09	1.51357	0.514	0.131	9.73658e-05
CYB561D2	1.80514e-07	1.51298	0.445	0.115	0.00327814
ST6GALNAC5	8.85229e-07	1.50849	0.481	0.148	0.0160758
RSRP1	1.934e-18	1.50736	0.801	0.23	3.51214e-14
RPAP2	1.7959e-06	1.50702	0.334	0.066	0.0326136
GBF1	2.58993e-11	1.50326	0.592	0.148	4.70331e-07
YAF2	1.15808e-06	1.50104	0.306	0.049	0.0210307
TRA2A	2.65253e-11	1.49975	0.705	0.246	4.81699e-07
FAR2	4.45564e-07	1.49925	0.345	0.066	0.00809144
FARP1	6.37261e-10	1.49805	0.605	0.18	1.15727e-05
GIGYF2	1.43469e-07	1.49669	0.445	0.115	0.0026054
LRP6	8.63847e-10	1.49627	0.54	0.131	1.56875e-05
ACBD4	1.86671e-09	1.49589	0.408	0.066	3.38994e-05
SNAP25	2.12741e-18	1.49133	0.911	0.426	3.86338e-14
MGAT5	2.74399e-11	1.49085	0.705	0.246	4.98308e-07
PRKD1	5.15665e-07	1.49014	0.406	0.098	0.00936447
SESTD1	1.91287e-06	1.48988	0.312	0.049	0.0347378
EML4	1.01821e-13	1.48896	0.735	0.23	1.84906e-09
SOBP	7.30717e-13	1.48757	0.683	0.197	1.32698e-08
UPF2	1.73711e-12	1.48709	0.503	0.082	3.15459e-08
EXOC1	1.70405e-08	1.48496	0.471	0.115	0.000309456
ACTR3B	5.48196e-07	1.48054	0.356	0.066	0.00995524
SWT1	4.7895e-07	1.47662	0.304	0.049	0.00869774
DICER1	6.2501e-08	1.47117	0.445	0.098	0.00113502
UBE3C	2.59066e-09	1.46994	0.464	0.098	4.70464e-05
TMEM87A	5.32107e-07	1.46993	0.349	0.066	0.00966307
CDK6	3.7757e-12	1.46918	0.456	0.066	6.85667e-08
PROX1	8.14902e-10	1.46388	0.603	0.18	1.47986e-05
FAR1	3.96938e-07	1.45717	0.434	0.115	0.00720839
STS	3.24374e-07	1.45598	0.38	0.082	0.00589064
STRBP	3.16965e-09	1.45503	0.384	0.066	5.75609e-05
CD164	1.58301e-12	1.45463	0.638	0.164	2.87474e-08
TMEM144	9.1489e-08	1.45276	0.315	0.049	0.00166144
ARGLU1	3.73989e-20	1.45205	0.868	0.295	6.79163e-16
DDAH1	1.06201e-07	1.45019	0.473	0.131	0.00192861
NEGR1	1.37903e-10	1.44766	0.494	0.098	2.50432e-06
CHM	2.61398e-07	1.44219	0.44	0.115	0.00474698
RBM3	1.54682e-16	1.44111	0.698	0.164	2.80903e-12
MTF2	1.39056e-06	1.44074	0.328	0.066	0.0252525
U2SURP	4.79158e-14	1.43952	0.781	0.279	8.70151e-10
CAMK2G	6.85306e-10	1.43572	0.601	0.18	1.24452e-05
DNAJC1	2.90116e-17	1.43507	0.707	0.164	5.2685e-13
ATF7IP	4.06548e-15	1.42936	0.755	0.23	7.38291e-11
FKBP5	3.45467e-19	1.42824	0.909	0.393	6.27368e-15
ZNF821	1.45596e-08	1.42267	0.386	0.066	0.000264403
RHBDF1	7.1641e-09	1.42074	0.256	0.016	0.0001301
SVBP	3.85168e-07	1.41967	0.44	0.115	0.00699465
TMEM255A	6.60156e-07	1.41925	0.384	0.082	0.0119884
ARID4A	2.86371e-07	1.41828	0.495	0.148	0.00520049
TRPC1	1.90421e-06	1.40402	0.395	0.098	0.0345804
ATP11B	3.32735e-17	1.40347	0.787	0.23	6.04247e-13
DNAJB6	5.53592e-08	1.40311	0.289	0.033	0.00100532
KIF21A	6.10868e-11	1.40043	0.581	0.148	1.10934e-06
PFDN1	3.02636e-08	1.39922	0.414	0.082	0.000549586
KIF5B	3.18406e-11	1.39804	0.647	0.197	5.78225e-07
LSM14A	4.5206e-07	1.39718	0.388	0.082	0.00820942
PBX3	1.59067e-09	1.39243	0.545	0.148	2.88866e-05
ATRX	1.03917e-16	1.39103	0.816	0.279	1.88714e-12
NSD1	2.63297e-10	1.38873	0.482	0.098	4.78147e-06
RABEP1	1.05442e-11	1.38705	0.56	0.131	1.91482e-07
ELAVL4	4.85158e-16	1.38693	0.781	0.246	8.81047e-12
TRMT6	1.72095e-10	1.3823	0.51	0.115	3.12525e-06
BAG3	9.22339e-11	1.37881	0.505	0.098	1.67497e-06
KLC1	2.20698e-13	1.37603	0.757	0.262	4.00788e-09
SAT1	3.24494e-15	1.37572	0.712	0.197	5.89282e-11
TOP2B	3.9977e-09	1.36942	0.56	0.164	7.25981e-05
FAM135A	3.59285e-10	1.36939	0.369	0.049	6.52462e-06
CLASP1	5.39382e-07	1.3667	0.566	0.213	0.00979517
EXT1	2.23511e-11	1.36458	0.594	0.148	4.05895e-07
PTPRG	3.94889e-12	1.36372	0.686	0.213	7.17118e-08
SKI	2.05469e-09	1.36174	0.584	0.18	3.73131e-05
AKT3	2.21222e-10	1.35685	0.729	0.295	4.0174e-06
KAT6A	1.0737e-06	1.3556	0.395	0.098	0.0194984
KMT2C	1.22353e-14	1.34557	0.857	0.377	2.22193e-10
VSTM2L	1.02757e-07	1.34451	0.406	0.098	0.00186607
CHD4	2.84936e-10	1.33854	0.629	0.197	5.17443e-06
HTT	3.53784e-09	1.33554	0.51	0.131	6.42472e-05
FAM120A	1.78782e-15	1.33122	0.759	0.23	3.24668e-11
ATP11C	8.74115e-11	1.32924	0.423	0.066	1.58739e-06
SMAP1	1.11171e-07	1.32904	0.419	0.098	0.00201886
PEPD	3.62443e-09	1.3287	0.675	0.262	6.58197e-05
ZNF438	4.1761e-11	1.32712	0.391	0.049	7.58379e-07
SNAP91	2.02867e-07	1.32397	0.56	0.197	0.00368407
RNPC3	3.90241e-11	1.3188	0.529	0.115	7.08678e-07
EPC1	4.97268e-14	1.31772	0.633	0.148	9.0304e-10
TSHZ3	1.57252e-07	1.3165	0.345	0.066	0.0028557
DDX5	8.86968e-20	1.31528	0.961	0.607	1.61073e-15
APC	2.81249e-08	1.31103	0.601	0.213	0.000510747
CNTRL	3.233e-12	1.31038	0.523	0.098	5.87114e-08
LPGAT1	8.10707e-09	1.30575	0.596	0.197	0.000147224
ANKRD11	1.05629e-11	1.30304	0.696	0.23	1.91823e-07
NFKB1	1.01551e-06	1.30299	0.328	0.066	0.0184417
PTCH1	3.54877e-08	1.29737	0.369	0.066	0.000644456
CCNT2	4.10591e-07	1.29563	0.401	0.098	0.00745633
TANC1	4.25497e-07	1.29321	0.33	0.066	0.00772703
PPM1K	9.94006e-09	1.29146	0.495	0.131	0.000180512
CLASP2	1.38533e-14	1.29122	0.848	0.361	2.51575e-10
MYO5A	1.13365e-10	1.29054	0.421	0.066	2.05871e-06
NEK1	7.17986e-08	1.28362	0.475	0.131	0.00130386
SETBP1	8.06599e-07	1.28222	0.516	0.18	0.0146478
FXR1	1.19606e-14	1.27539	0.666	0.164	2.17205e-10
MSRA	2.60544e-08	1.27445	0.39	0.082	0.000473148
NR2C2	1.0302e-06	1.27208	0.521	0.18	0.0187085
BTBD9	2.72844e-13	1.26888	0.666	0.18	4.95485e-09
DNMT3A	3.30738e-08	1.26225	0.575	0.197	0.000600619
SLMAP	9.8493e-07	1.26171	0.49	0.164	0.0178863
TTBK2	7.2954e-09	1.25794	0.481	0.115	0.000132484
KIF2A	1.10551e-07	1.25614	0.442	0.115	0.0020076
SESN3	1.64728e-15	1.25308	0.859	0.361	2.99146e-11
DTNA	1.37082e-06	1.25088	0.553	0.213	0.0248941
XPO4	6.66374e-09	1.25069	0.506	0.131	0.000121013
SCAPER	1.29678e-09	1.24675	0.488	0.115	2.35496e-05
TANC2	1.01569e-07	1.24248	0.401	0.098	0.00184449
TNPO1	2.73448e-07	1.24239	0.573	0.213	0.00496582
MAN1A2	5.81864e-09	1.22801	0.464	0.115	0.000105666
DNM3	1.69317e-09	1.22651	0.592	0.18	3.07479e-05
PAK5	8.29862e-08	1.22195	0.345	0.066	0.00150703
ARVCF	6.80617e-11	1.22009	0.67	0.23	1.236e-06
BMPR1A	4.5517e-08	1.21948	0.477	0.131	0.000826589
CDK13	3.56266e-13	1.21909	0.558	0.115	6.46979e-09
PTPRF	4.39782e-09	1.21871	0.688	0.279	7.98644e-05
AGPAT5	2.3217e-06	1.21806	0.347	0.082	0.0421621
DDX17	5.16719e-16	1.21408	0.865	0.361	9.38362e-12
PTBP3	3.565e-09	1.21342	0.553	0.164	6.47404e-05
ZFAND3	1.10554e-13	1.21235	0.763	0.262	2.00765e-09
AVL9	6.70912e-07	1.20829	0.347	0.082	0.0121838
KIF13A	7.08317e-07	1.20612	0.54	0.197	0.012863
UBE2W	1.26166e-09	1.20209	0.421	0.082	2.29118e-05
FUBP1	8.67509e-10	1.2017	0.672	0.246	1.5754e-05
SPIRE1	2.44333e-06	1.20126	0.564	0.23	0.0443709
NCK1	2.28069e-06	1.19997	0.397	0.115	0.0414174
TTLL11	2.41372e-06	1.19951	0.276	0.049	0.0438332
VWA8	5.09204e-08	1.19624	0.466	0.131	0.000924715
PPP2R5A	1.63128e-08	1.18995	0.466	0.115	0.000296241
ZNF827	2.03933e-08	1.18663	0.512	0.148	0.000370343
TRAK1	5.44854e-11	1.18458	0.579	0.148	9.89455e-07
MTRF1L	2.86943e-07	1.18292	0.26	0.033	0.00521089
SRRM1	3.42006e-11	1.18081	0.618	0.18	6.21084e-07
RBMX2	1.52968e-07	1.1796	0.295	0.049	0.00277789
EFR3A	7.15791e-13	1.17842	0.618	0.164	1.29988e-08
CHD9	5.87484e-11	1.17745	0.555	0.131	1.06687e-06
PRRC2C	2.91621e-12	1.17546	0.657	0.197	5.29584e-08
TBCD	5.17975e-11	1.17313	0.571	0.148	9.40642e-07
ADAM10	7.34287e-09	1.17087	0.475	0.115	0.000133347
UBE2K	1.44449e-06	1.16489	0.44	0.131	0.0262319
PCF11	2.6563e-08	1.16102	0.562	0.18	0.000482383
BICD1	4.76337e-07	1.15649	0.583	0.23	0.00865028
CDH2	1.95939e-14	1.15505	0.935	0.541	3.55826e-10
PPARA	8.22355e-07	1.15427	0.34	0.082	0.014934
PHF3	3.82951e-08	1.15282	0.629	0.246	0.000695439
PHF20L1	1.03729e-11	1.15159	0.622	0.18	1.88372e-07
ZNF207	5.84783e-11	1.13813	0.384	0.033	1.06197e-06
STK38L	2.45237e-07	1.13673	0.51	0.164	0.00445351
PCGF3	8.28272e-11	1.13644	0.588	0.164	1.50414e-06
CDK11B	1.11673e-06	1.13131	0.345	0.082	0.0202799
NOP56	9.06878e-09	1.12563	0.456	0.115	0.000164689
PSME4	4.96098e-08	1.12424	0.43	0.115	0.000900914
SAFB2	1.46419e-12	1.12259	0.683	0.213	2.65897e-08
CYTH3	1.75316e-09	1.12159	0.477	0.115	3.18375e-05
FBXW11	5.4498e-09	1.12059	0.455	0.115	9.89683e-05
BCAP29	9.4841e-09	1.12009	0.427	0.098	0.000172231
WSB1	2.6534e-15	1.11743	0.729	0.213	4.81857e-11
AP3S2	2.35686e-07	1.11231	0.43	0.115	0.00428007
RTN1	2.97182e-12	1.11107	0.688	0.23	5.39683e-08
SNX9	1.191e-06	1.10754	0.377	0.098	0.0216285
CADM1	1.83838e-16	1.10611	0.928	0.475	3.33849e-12
LCOR	5.51655e-09	1.10429	0.406	0.082	0.000100181
ADCYAP1R1	1.67448e-07	1.10272	0.711	0.344	0.00304085
SLC25A36	1.37752e-09	1.09937	0.519	0.131	2.50157e-05
RASA3	8.92305e-08	1.08854	0.319	0.049	0.00162043
MAP1A	3.7402e-09	1.08651	0.529	0.148	6.79221e-05
LYRM4	4.00338e-09	1.0837	0.336	0.049	7.27013e-05
ATXN2	3.23506e-07	1.08273	0.545	0.197	0.00587486
UBR3	3.05271e-12	1.08208	0.738	0.279	5.54373e-08
EEA1	2.72938e-12	1.07897	0.56	0.131	4.95655e-08
CDC26	1.57812e-10	1.07751	0.473	0.098	2.86586e-06
PTK2	1.55601e-13	1.07555	0.699	0.213	2.82572e-09
ARL6	5.66947e-09	1.07034	0.429	0.098	0.000102958
CAMTA1	1.91869e-09	1.07007	0.601	0.197	3.48433e-05
APPL2	2.38237e-06	1.06459	0.351	0.098	0.0432638
STAG2	2.04469e-12	1.0627	0.638	0.18	3.71317e-08
PITPNC1	9.31328e-08	1.0606	0.25	0.033	0.00169129
TBCK	1.20351e-06	1.06058	0.377	0.098	0.0218557
PDS5B	1.12711e-08	1.0605	0.529	0.148	0.000204684
PNISR	4.83666e-11	1.05811	0.805	0.377	8.78338e-07
PLXNB1	4.19806e-07	1.057	0.325	0.066	0.00762369
ZNF704	2.46155e-09	1.05643	0.629	0.23	4.47017e-05
NR1D2	4.84645e-13	1.05364	0.647	0.164	8.80116e-09
PPP2R5C	1.25832e-09	1.0527	0.622	0.213	2.2851e-05
CDC42BPA	6.80396e-15	1.04107	0.701	0.197	1.2356e-10
ZHX1	2.09979e-17	1.03975	0.636	0.131	3.81321e-13
CCND2	4.19437e-14	1.03852	0.722	0.23	7.61697e-10
TMIE	1.80676e-08	1.03788	0.384	0.082	0.000328108
TAGLN3	3.11524e-07	1.03401	0.512	0.18	0.00565728
BAMBI	1.33456e-07	1.0324	0.449	0.115	0.00242355
TMEM200B	1.73695e-11	1.03022	0.323	0.033	3.1543e-07
DCAF5	1.13392e-07	1.02951	0.367	0.082	0.0020592
PPDPF	9.03492e-07	1.02415	0.514	0.18	0.0164074
NF1	1.1908e-09	1.02365	0.499	0.131	2.16249e-05
DAB2IP	4.77176e-07	1.02096	0.455	0.131	0.00866552
PPP3CB	2.02756e-08	1.01518	0.618	0.23	0.000368205
RAPGEF6	1.75063e-10	1.01362	0.555	0.148	3.17914e-06

## Sheet: Zona glomerulosa cell
gene	p_val	avg_log2FC	pct.1	pct.2	p_val_adj
DPP6	0	12.7402	0.995	0	0
KCNIP4	0	12.4832	0.944	0	0
HSD3B1	0	12.0402	0.998	0	0
IL1RAPL1	0	11.7213	0.894	0	0
KCNB2	0	11.3935	0.966	0	0
PRIMA1	0	11.0105	0.981	0	0
KCNC2	0	10.9783	0.966	0	0
SYT1	0	10.5305	0.984	0.002	0
SLC22A16	0	10.5266	0.931	0	0
ZNF385D	0	10.2742	0.941	0.002	0
GPC5	0	10.234	0.805	0	0
HHLA2	0	10.1519	0.89	0.001	0
HS3ST5	0	10.1189	0.864	0	0
CDH18	0	10.1143	0.719	0	0
EEF1A1	0	9.73947	0.853	0	0
CTBP1	0	9.66894	0.879	0	0
DAB1	0	9.64906	0.857	0.001	0
FAM84A	0	9.63745	0.841	0	0
IL1RAPL2	0	9.5898	0.676	0	0
KLHDC7A	0	9.55273	0.864	0	0
MATR3	0	9.50611	0.887	0	0
KCNG2	0	9.39272	0.764	0	0
PAPOLB	0	9.35214	0.857	0	0
LDB3	0	9.28754	0.783	0	0
PLXNA4	0	9.271	0.892	0.005	0
TPT1	0	9.27093	0.788	0	0
CCDC88C	0	9.14878	0.941	0.004	0
TMEM211	0	9.14779	0.718	0	0
CNTNAP2	2.64208e-288	9.13858	0.631	0.001	4.79802e-284
BRSK2	1.0092471633201e-317	9.07448	0.665	0	1.83279284858931e-313
BMPR1B	0	9.05472	0.963	0.007	0
RBFOX1	3.75301e-131	9.02228	0.346	0	6.81546e-127
THSD7B	0	8.9733	0.871	0.001	0
PLA2G3	0	8.95865	0.685	0	0
HIVEP1	0	8.92537	0.707	0	0
GAPDH	0	8.92176	0.706	0	0
SEMA3A	0	8.85996	0.711	0.001	0
GNAS	0	8.84375	0.744	0	0
DACH2	0	8.80339	0.771	0.002	0
XKR4	1.08772e-166	8.77462	0.421	0	1.9753e-162
TENM2	0	8.75367	0.96	0.004	0
HPX	0	8.74089	0.735	0.002	0
MYPN	4.07307e-248	8.74075	0.566	0	7.39669e-244
TRPC5	0	8.71234	0.702	0	0
JPH1	0	8.6932	0.706	0.001	0
PEX5L	6.61817e-248	8.65968	0.565	0	1.20186e-243
SREK1	0	8.65921	0.705	0	0
HNRNPH1	0	8.64288	0.726	0	0
LHFPL5	0	8.631	0.688	0	0
ENOX1	0	8.5764	0.754	0.004	0
KCNG4	3.79244e-283	8.50398	0.618	0	6.88708e-279
NAP1L1	3.53348116591431e-316	8.46907	0.663	0	6.41680179730039e-312
ADGRA1	1.4294e-214	8.4599	0.51	0	2.5958e-210
SHISA9	1.69555e-200	8.41148	0.485	0	3.07912e-196
GOLGA4	8.05845e-304	8.3775	0.647	0	1.46341e-299
ZC3H11A	6.75712868632674e-315	8.3708	0.662	0	1.22709456943694e-310
NEBL	0	8.35856	0.948	0.011	0
USP9Y	4.32535e-302	8.33655	0.645	0	7.85484e-298
DOK6	0	8.33299	0.813	0.004	0
TAFA2	0	8.32179	0.986	0.021	0
ISM1	0	8.27262	0.869	0.01	0
AFF2	0	8.25002	0.896	0.007	0
FILIP1	0	8.23183	0.942	0.007	0
EEF1D	6.24132e-255	8.18718	0.576	0	1.13342e-250
TLL1	1.2715075835112e-318	8.18116	0.676	0.002	2.30905777165634e-314
BMAL2	8.69802e-261	8.17436	0.585	0	1.57956e-256
APOF	7.48781e-213	8.17242	0.507	0	1.35979e-208
SOX5	0	8.1675	0.866	0.006	0
KCNC1	1.64381e-176	8.15522	0.44	0	2.98515e-172
PNPLA3	1.12874e-271	8.10848	0.602	0	2.04979e-267
UBR1	1.27602e-274	8.10709	0.606	0	2.31726e-270
SLC1A6	5.90546e-258	8.08955	0.581	0	1.07243e-253
NDST3	2.53407e-187	8.04694	0.461	0	4.60186e-183
NPM1	2.42758e-244	8.02364	0.56	0	4.40849e-240
ATPIF1	3.06081e-228	8.01164	0.533	0	5.55844e-224
SH3GL3	7.62711e-232	7.99711	0.539	0	1.38508e-227
HMGB1	2.8783e-234	7.97468	0.543	0	5.22699e-230
PLPPR5	2.03468e-201	7.96667	0.487	0	3.69497e-197
RASGEF1C	6.69598e-212	7.93847	0.505	0	1.21599e-207
SRSF6	1.74577e-247	7.92214	0.565	0	3.17032e-243
PIN4	2.16078e-219	7.91352	0.518	0	3.92398e-215
PABPC1	1.22261e-228	7.87315	0.534	0	2.22026e-224
CDIN1	2.81926e-189	7.84163	0.464	0	5.11977e-185
ITPRID1	4.08983e-174	7.82878	0.435	0	7.42714e-170
KCNQ2	8.23021e-190	7.81844	0.465	0	1.49461e-185
CYRIB	4.9102e-218	7.80276	0.516	0	8.91693e-214
FAM60A	1.57169e-215	7.80168	0.512	0	2.85419e-211
GREB1L	0	7.7826	0.952	0.014	0
MPPED1	6.22059e-208	7.75149	0.498	0	1.12966e-203
ARHGAP6	0	7.75069	0.806	0.009	0
INSYN2A	1.89988e-183	7.73307	0.453	0	3.45018e-179
C12ORF75	1.58917e-190	7.73247	0.467	0	2.88593e-186
BRE	5.45742e-190	7.71058	0.466	0	9.91067e-186
PKIB	2.93262e-153	7.69536	0.393	0	5.32563e-149
ZBTB32	2.03846e-217	7.68219	0.522	0.001	3.70184e-213
DNAAF9	3.87945e-192	7.67247	0.47	0	7.04508e-188
CHSY3	1.17872e-122	7.66998	0.327	0	2.14056e-118
PCDH9	0	7.66907	0.78	0.011	0
FKBP4	3.98785e-205	7.65579	0.493	0	7.24194e-201
ATP5B	6.39975e-189	7.63806	0.464	0	1.16219e-184
HOMER1	0	7.63353	0.787	0.006	0
PPM1H	0	7.62692	0.994	0.042	0
SLC35F4	5.22467e-138	7.61114	0.361	0	9.48801e-134
TMEM255A	0	7.60997	0.752	0.005	0
MRPL57	3.80965e-187	7.60173	0.46	0	6.91832e-183
C6ORF52	4.25471e-183	7.56941	0.453	0	7.72655e-179
ATP5I	2.13743e-171	7.56853	0.43	0	3.88157e-167
TJP2	1.4472e-160	7.56428	0.408	0	2.62812e-156
ATP5G3	1.08868e-165	7.5381	0.419	0	1.97705e-161
YLPM1	4.89515e-193	7.53353	0.471	0	8.8896e-189
SLITRK6	2.67164e-157	7.53242	0.402	0	4.8517e-153
LMO1	2.97887e-218	7.51838	0.527	0.002	5.40963e-214
PDHA2	4.61881e-191	7.50788	0.468	0	8.38776e-187
PIP5K1B	2.93262e-153	7.48588	0.393	0	5.32563e-149
TPK1	0	7.47663	0.944	0.015	0
CES5A	3.15558e-171	7.46678	0.43	0	5.73053e-167
FAR2	8.93139049324361e-315	7.45192	0.674	0.004	1.62194051357304e-310
MSH4	5.69984e-253	7.45105	0.58	0.001	1.03509e-248
MND1	2.33347204530821e-320	7.44978	0.683	0.005	4.2375852342797e-316
KCNT2	3.72052e-187	7.44474	0.479	0.005	6.75646e-183
LRTM2	3.353e-163	7.4399	0.414	0	6.08905e-159
MEGF11	2.44646e-102	7.41301	0.28	0	4.44277e-98
ATP5L	2.51622e-156	7.41129	0.4	0	4.56945e-152
ANK2	0	7.38841	0.885	0.023	0
UNKL	2.20696e-170	7.38733	0.428	0	4.00783e-166
BNC2	0	7.38637	0.739	0.016	0
ACCSL	7.98098e-176	7.37871	0.439	0	1.44935e-171
HS6ST2	2.5921e-148	7.37866	0.383	0	4.70725e-144
NUDT4	2.34276e-165	7.37814	0.418	0	4.25446e-161
EDAR	5.53789e-124	7.36611	0.33	0	1.00568e-119
GPX1	1.28657e-152	7.34071	0.392	0	2.33641e-148
LAMA1	1.41864e-133	7.33848	0.351	0	2.57625e-129
IMPG2	3.41693e-155	7.33547	0.397	0	6.20514e-151
SLC25A3	1.58735e-167	7.32968	0.422	0	2.88264e-163
IDI2	4.65539e-161	7.32806	0.409	0	8.45419e-157
PDXDC1	4.98753e-164	7.32524	0.415	0	9.05736e-160
WTAP	9.4067e-173	7.32118	0.433	0	1.70826e-168
CPNE4	8.07462e-161	7.30011	0.417	0.001	1.46635e-156
HTR1F	1.24338e-197	7.27726	0.487	0.001	2.25798e-193
H3F3C	1.39259e-149	7.2747	0.386	0	2.52894e-145
TRPC6	1.11435e-274	7.25722	0.628	0.007	2.02367e-270
SLC25A21	1.27949e-278	7.25303	0.636	0.009	2.32356e-274
TNFSF15	1.41969e-146	7.23696	0.379	0	2.57816e-142
COL20A1	2.1584e-117	7.23365	0.315	0	3.91966e-113
JAKMIP1	1.15417e-132	7.23	0.349	0	2.09598e-128
GATA5	7.87729e-216	7.22678	0.523	0.002	1.43052e-211
UNC-11	6.27276e-159	7.2189	0.405	0	1.13913e-154
MRPS28	4.01475e-143	7.20009	0.372	0	7.29078e-139
CLSTN2	0	7.19265	0.722	0.017	0
ADGRB3	6.4491e-230	7.18635	0.592	0.027	1.17116e-225
SMTNL2	8.23666e-143	7.18556	0.371	0	1.49578e-138
HNRNPA1	9.65542e-150	7.15455	0.386	0	1.75342e-145
FAM21C	8.13776e-152	7.15195	0.39	0	1.47782e-147
WASHC2C	8.13776e-152	7.15195	0.39	0	1.47782e-147
OLA1	7.36009e-140	7.14532	0.365	0	1.33659e-135
SUSD4	0	7.13987	0.772	0.011	0
PPFIA1	2.25166e-144	7.13934	0.375	0	4.08902e-140
SEMA6D	2.51467e-221	7.13767	0.533	0.002	4.56664e-217
GARRE1	3.46024e-142	7.13348	0.37	0	6.2838e-138
AGXT2	8.85084e-113	7.13323	0.304	0	1.60731e-108
GSTM2	7.04502e-134	7.12827	0.352	0	1.27937e-129
GSTM4	7.04502e-134	7.12827	0.352	0	1.27937e-129
MACROH2A1	3.31889e-147	7.12285	0.381	0	6.02711e-143
DARS1	1.5e-139	7.1127	0.364	0	2.724e-135
ORAOV1	3.31889e-147	7.11226	0.381	0	6.02711e-143
KARS1	7.40258e-151	7.0842	0.388	0	1.34431e-146
CAMK4	1.2326e-111	7.07825	0.302	0	2.23841e-107
TMEM178B	0	7.07693	0.885	0.02	0
AHSA2	3.22955e-144	7.05032	0.374	0	5.86486e-140
ATP5D	1.905e-128	7.04708	0.34	0	3.45948e-124
HSF3	7.33681e-136	7.02614	0.356	0	1.33236e-131
HMGA2	5.88043e-94	7.02044	0.259	0	1.06789e-89
PPP1R14C	8.8725e-112	7.00873	0.302	0	1.61125e-107
ELMO1	3.65135e-295	7.00398	0.656	0.007	6.63086e-291
MKRN4P	1.06082e-137	7.00379	0.36	0	1.92645e-133
MACIR	1.29812e-125	7.00148	0.334	0	2.35738e-121
CHST8	2.31803e-195	6.99337	0.501	0.007	4.20954e-191
CYRIA	5.42512e-119	6.99043	0.319	0	9.85201e-115
SIK1	3.47687e-121	6.98879	0.324	0	6.31399e-117
PDE10A	0	6.98527	0.861	0.081	0
HNRNPAB	8.86995e-139	6.97905	0.363	0	1.61078e-134
TBCA	4.64994e-126	6.97589	0.335	0	8.44428e-122
CADPS	1.2326e-111	6.97237	0.302	0	2.23841e-107
HYCC1	5.35546e-128	6.9667	0.339	0	9.72552e-124
COX5A	4.21586e-127	6.96543	0.337	0	7.65601e-123
STXBP6	2.46327e-251	6.95781	0.591	0.006	4.4733e-247
BMAL1	5.35546e-128	6.95071	0.339	0	9.72552e-124
KCNE2	1.40867e-154	6.95006	0.409	0.002	2.55814e-150
SDK1	0	6.9181	0.7	0.005	0
EFNA5	0	6.91194	0.893	0.039	0
KCTD8	2.20822e-113	6.90832	0.315	0.001	4.01013e-109
ATP5J2	2.34362e-126	6.9054	0.335	0	4.25602e-122
TSSC1	1.76898e-121	6.90167	0.324	0	3.21247e-117
EEIG1	6.54836e-126	6.89762	0.334	0	1.18918e-121
AMY1A	5.35546e-128	6.88752	0.339	0	9.72552e-124
ROBO2	1.06677e-106	6.88694	0.303	0.002	1.93726e-102
SANBR	1.2326e-111	6.88038	0.302	0	2.23841e-107
PHACTR3	6.07008e-180	6.87703	0.454	0.001	1.10233e-175
HMGCLL1	1.41911e-134	6.86664	0.362	0.001	2.57711e-130
C6orf106	4.64994e-126	6.85508	0.335	0	8.44428e-122
IARS1	3.61924e-125	6.85208	0.333	0	6.57254e-121
TRABD2B	1.05641e-99	6.85145	0.286	0.002	1.91845e-95
SLITRK2	1.21242e-109	6.84844	0.297	0	2.20175e-105
GATSL2	3.30223e-111	6.83823	0.301	0	5.99685e-107
ZFR2	6.8298e-121	6.83438	0.323	0	1.24029e-116
MTCL1	1.21027e-151	6.81244	0.398	0.001	2.19785e-147
NAMPTP1	5.8771e-117	6.8094	0.314	0	1.06728e-112
TXN	6.30451e-110	6.80911	0.298	0	1.1449e-105
GFOD1	1.0698e-158	6.80445	0.413	0.001	1.94275e-154
RIMBP2	2.44646e-102	6.80085	0.28	0	4.44277e-98
BBOX1	2.36412e-113	6.79843	0.306	0	4.29325e-109
NHS	0	6.78768	0.999	0.182	0
TLR21	1.69901e-113	6.78465	0.306	0	3.0854e-109
HSD11B2	0	6.77972	0.822	0.015	0
EPRS1	1.6545e-122	6.77553	0.327	0	3.00457e-118
MMP16	2.87742e-129	6.77524	0.355	0.002	5.2254e-125
FMN1	4.25778e-203	6.76329	0.512	0.006	7.73212e-199
LRRC3B	2.60892e-90	6.76266	0.25	0	4.7378e-86
CHN2	2.37881e-112	6.76066	0.303	0	4.31991e-108
ZCCHC6	1.23074e-112	6.76012	0.304	0	2.23503e-108
SKP1	3.28917e-113	6.75683	0.305	0	5.97313e-109
SHFM1	6.36564e-111	6.75427	0.3	0	1.156e-106
MACROD2	0	6.74708	0.849	0.029	0
EIF3K	1.681e-109	6.74691	0.297	0	3.05269e-105
SETD2	5.66573e-118	6.74432	0.316	0	1.0289e-113
WHSC1L1	8.63554e-115	6.72461	0.309	0	1.56821e-110
MRPS35	1.69901e-113	6.72182	0.306	0	3.0854e-109
GLS2	1.65234e-142	6.72027	0.383	0.002	3.00065e-138
SRP14	2.15442e-106	6.71479	0.289	0	3.91242e-102
NPAS3	0	6.69544	0.997	0.103	0
CASR	9.90834e-136	6.6856	0.365	0.001	1.79935e-131
ATP5C1	1.70201e-110	6.67007	0.299	0	3.09085e-106
PAPD5	2.07228e-105	6.66865	0.287	0	3.76326e-101
CD109	2.04566e-238	6.65948	0.572	0.006	3.71493e-234
USP6	2.86201e-105	6.65672	0.287	0	5.19741e-101
ZFAND6	1.60842e-107	6.65354	0.292	0	2.9209e-103
ZZZ3	5.68856e-106	6.63574	0.288	0	1.03304e-101
TMTC2	0	6.62881	0.887	0.032	0
HMGN2P46	3.15548e-101	6.61233	0.277	0	5.73034e-97
PTP4A2	2.33037e-109	6.60612	0.296	0	4.23195e-105
CACYBP	1.21067e-101	6.60229	0.278	0	2.19858e-97
MINOS1	3.73195e-99	6.59478	0.272	0	6.77721e-95
RAD51AP1	1.12985e-100	6.5703	0.276	0	2.05181e-96
C8ORF48	1.50141e-93	6.56129	0.258	0	2.72656e-89
SASH1	0	6.5576	0.878	0.036	0
ARNTL2	2.9894e-251	6.55712	0.585	0.004	5.42876e-247
MTFR2	3.95219e-105	6.54883	0.286	0	7.17717e-101
UNC79	0	6.5422	0.835	0.022	0
PTPRK	0	6.53557	0.986	0.068	0
CACNA2D2	2.12871e-139	6.53513	0.38	0.004	3.86574e-135
PLEKHG1	2.68836e-258	6.52642	0.605	0.007	4.88205e-254
BC067074	8.03818e-94	6.52544	0.259	0	1.45973e-89
PAK3	1.67944e-170	6.5232	0.441	0.002	3.04986e-166
KCNA6	8.99125e-95	6.5231	0.261	0	1.63281e-90
ATP5H	3.38916e-92	6.51785	0.255	0	6.15471e-88
PAPD7	8.99125e-95	6.51419	0.261	0	1.63281e-90
CDC42	8.21511e-101	6.51081	0.276	0	1.49186e-96
HDAC9	0	6.51055	0.854	0.029	0
ASB9	4.14979e-124	6.501	0.339	0.001	7.53602e-120
RTN1	0	6.48422	0.79	0.017	0
TPM3	8.06446e-97	6.4801	0.266	0	1.46451e-92
U2AF1	3.42868e-98	6.46917	0.27	0	6.22648e-94
TLN2	0	6.46238	0.827	0.015	0
PLCL1	0	6.4607	0.795	0.025	0
PFKFB4	3.09934e-293	6.44721	0.659	0.01	5.6284e-289
MGAT4A	0	6.42513	0.956	0.041	0
CLMN	4.90053e-300	6.40926	0.669	0.01	8.89936e-296
MRPS6	4.62558e-92	6.39207	0.255	0	8.40006e-88
FMR1NB	2.18659e-91	6.37365	0.253	0	3.97085e-87
FOXP2	0	6.37341	0.824	0.027	0
TARDBP	1.10517e-96	6.37333	0.266	0	2.00698e-92
COL23A1	1.20966e-88	6.35582	0.26	0.002	2.19673e-84
RNF144B	3.04953e-129	6.34753	0.359	0.004	5.53795e-125
TSPAN5	2.79096e-92	6.3399	0.265	0.001	5.06838e-88
KCNK5	1.24169e-273	6.30905	0.636	0.011	2.25491e-269
FGFR3	3.04601e-157	6.30808	0.423	0.005	5.53155e-153
MCU	0	6.29799	0.842	0.031	0
GDNF	2.61129e-249	6.24462	0.6	0.011	4.74211e-245
PPP2R2C	9.72776e-110	6.23296	0.312	0.002	1.76656e-105
MAP2	2.32012e-297	6.23021	0.671	0.012	4.21334e-293
CNKSR2	3.85955e-152	6.22141	0.413	0.005	7.00894e-148
SLC8A3	1.83802e-116	6.20828	0.322	0.001	3.33785e-112
RASA4B	1.77061e-115	6.20806	0.325	0.002	3.21543e-111
CCDC171	0	6.20594	0.88	0.057	0
PUDP	3.7167e-215	6.18001	0.54	0.009	6.74953e-211
ADCY5	1.50026e-294	6.15453	0.681	0.021	2.72447e-290
SHISA2	7.45983e-95	6.14591	0.271	0.001	1.3547e-90
FKBP5	0	6.13724	0.999	0.172	0
MCTP1	9.39012e-192	6.04802	0.496	0.007	1.70525e-187
FGFRL1	0	6.04542	0.983	0.098	0
TDO2	1.01272e-91	6.0439	0.263	0.001	1.8391e-87
NHSL1	0	6.04304	0.869	0.022	0
RASAL2	0	6.03607	0.858	0.034	0
SETBP1	0	6.01816	0.862	0.034	0
COBL	5.1253e-140	6.0036	0.391	0.006	9.30755e-136
MAML2	3.14625e-295	5.96911	0.679	0.02	5.7136e-291
CACNA1C	0	5.95362	0.97	0.14	0
HIC2	0	5.92655	0.85	0.032	0
GNAL	3.76095e-190	5.90402	0.502	0.011	6.82988e-186
B3GAT1	2.98216e-86	5.90316	0.25	0.001	5.41561e-82
KCNK7	1.11052e-95	5.9026	0.282	0.004	2.0167e-91
SLC29A4	4.28113e-239	5.8956	0.59	0.014	7.77454e-235
C8orf48	7.5434e-90	5.88506	0.258	0.001	1.36988e-85
TTBK1	1.01613e-116	5.88454	0.335	0.005	1.84529e-112
TLR5	4.15446e-122	5.87857	0.351	0.006	7.5445e-118
EDIL3	7.83636e-280	5.86237	0.658	0.018	1.42308e-275
ITGA4	1.62391e-87	5.83646	0.252	0.001	2.94902e-83
ETNK1	0	5.81862	1	0.308	0
PLIN2	4.2163e-262	5.78774	0.629	0.016	7.6568e-258
HGF	0	5.78731	0.787	0.038	0
HMCN1	5.80192e-217	5.77288	0.554	0.014	1.05363e-212
KCNAB1	3.90073e-105	5.7574	0.305	0.004	7.08372e-101
PLXNA2	2.60762e-128	5.74595	0.363	0.005	4.73544e-124
PFKP	7.98495e-206	5.71312	0.531	0.011	1.45007e-201
TAF3	1.4448e-222	5.70584	0.567	0.016	2.62376e-218
EFCC1	3.81885e-115	5.63932	0.333	0.005	6.93503e-111
MAMLD1	1.03816e-213	5.62608	0.555	0.016	1.8853e-209
STEAP1	1.25246e-172	5.6202	0.461	0.007	2.27446e-168
RORB	0	5.61778	0.839	0.086	0
BASP1	1.66567e-129	5.60493	0.369	0.006	3.02485e-125
LBH	0	5.58176	0.754	0.023	0
SLC1A1	2.88472e-132	5.5732	0.375	0.006	5.23865e-128
UNC5C	0	5.55832	0.998	0.281	0
INPP5J	2.50837e-116	5.54712	0.331	0.004	4.5552e-112
ARHGEF4	3.33454e-293	5.53398	0.677	0.018	6.05553e-289
PRKCE	0	5.52525	0.835	0.042	0
EPHB6	2.17138e-90	5.51326	0.27	0.004	3.94322e-86
WWC1	4.33089e-169	5.5104	0.454	0.007	7.8649e-165
CTNNA2	1.04643e-225	5.45989	0.584	0.021	1.90032e-221
PDE8B	5.99046e-107	5.44672	0.318	0.006	1.08787e-102
BCL2	9.22823e-136	5.43309	0.396	0.011	1.67585e-131
DYSF	1.42428e-117	5.42455	0.349	0.009	2.58649e-113
PTPRF	0	5.39997	0.983	0.115	0
CSRP2	8.81868e-139	5.39596	0.389	0.006	1.60147e-134
RETREG1	1.71879e-101	5.38765	0.301	0.005	3.12132e-97
MAGI2	0	5.38016	0.956	0.113	0
SOX6	1.5716e-205	5.32292	0.556	0.025	2.85403e-201
FGD3	1.46062e-93	5.31725	0.286	0.006	2.65249e-89
ADAMTSL3	3.19823e-302	5.30368	0.705	0.029	5.80798e-298
MMP24	1.02549e-88	5.2953	0.27	0.005	1.86229e-84
GPRIN3	3.4946e-135	5.27181	0.385	0.007	6.3462e-131
ZNF423	1.18349e-268	5.27031	0.66	0.028	2.14922e-264
TRIM14	1.67004e-99	5.268	0.304	0.007	3.03279e-95
NPL	1.1349e-227	5.23569	0.583	0.018	2.06098e-223
TEAD4	2.66769e-161	5.21948	0.443	0.009	4.84452e-157
STAG3	3.97771e-123	5.20219	0.351	0.005	7.22351e-119
EGFR	0	5.18442	0.989	0.201	0
LDLRAD4	9.24995e-261	5.16202	0.665	0.043	1.67979e-256
SHANK2	4.36205e-145	5.15534	0.437	0.021	7.92149e-141
FANCD2	5.94303e-149	5.15397	0.43	0.014	1.07925e-144
RHBDF1	2.48928e-92	5.14413	0.283	0.006	4.52053e-88
MFSD13A	2.40374e-99	5.13728	0.3	0.006	4.36519e-95
SMAD6	2.11092e-93	5.10777	0.286	0.006	3.83342e-89
PPFIBP2	2.52092e-200	5.09697	0.542	0.021	4.57799e-196
FREM1	3.91025e-241	5.09154	0.597	0.015	7.10101e-237
KANK1	0	5.07925	0.867	0.082	0
ST8SIA1	1.3796e-232	5.07158	0.609	0.029	2.50535e-228
NALCN	3.53834e-188	5.06776	0.512	0.016	6.42563e-184
FRZB	3.23806e-237	5.06336	0.602	0.02	5.88032e-233
PLA2G4A	1.50184e-219	5.05618	0.582	0.025	2.72734e-215
TNFAIP8	1.79328e-119	5.05416	0.361	0.011	3.2566e-115
SEMA3C	2.85982e-205	5.04875	0.567	0.031	5.19344e-201
FARS2	3.01336e-289	5.0435	0.695	0.034	5.47226e-285
RAP1GDS1	0	5.0324	0.901	0.088	0
ESRRG	0	5.02711	0.975	0.171	0
SRGAP1	6.36037e-305	5.01995	0.726	0.045	1.15504e-300
PURG	5.20838e-86	4.99532	0.263	0.005	9.45842e-82
CDC14A	8.91599e-195	4.99196	0.533	0.021	1.61914e-190
ADAMTS2	8.1735e-102	4.98312	0.327	0.014	1.48431e-97
TMEM117	1.06662e-174	4.97848	0.504	0.025	1.93698e-170
RAB11FIP4	1.23361e-146	4.97257	0.428	0.015	2.24024e-142
CCSER1	1.13131e-76	4.95399	0.255	0.01	2.05447e-72
MYCBP2	0	4.9504	0.977	0.149	0
EVA1C	6.45797e-120	4.93707	0.375	0.016	1.17277e-115
KIAA1210	1.43402e-122	4.92313	0.369	0.011	2.60418e-118
CENPO	1.41985e-194	4.92187	0.554	0.033	2.57845e-190
GARNL3	1.60252e-205	4.9196	0.548	0.018	2.91018e-201
MED27	6.14868e-243	4.87346	0.628	0.031	1.1166e-238
MCF2L	5.16884e-225	4.86504	0.597	0.028	9.38662e-221
DAPK1	1.45624e-147	4.86361	0.435	0.016	2.64453e-143
BEND6	6.20078e-167	4.859	0.47	0.015	1.12606e-162
EML1	1.42885e-148	4.85897	0.444	0.02	2.59479e-144
NCALD	3.80767e-93	4.85678	0.302	0.012	6.91473e-89
S1PR1	1.4664e-242	4.84343	0.628	0.031	2.66299e-238
FYN	5.16682e-104	4.82808	0.319	0.009	9.38294e-100
GRM7	2.52645e-179	4.82604	0.515	0.025	4.58804e-175
TTLL7	1.88828e-127	4.82065	0.383	0.012	3.42912e-123
PDE4D	8.71469e-128	4.82043	0.402	0.021	1.58259e-123
CYP1B1	1.89626e-123	4.81348	0.391	0.02	3.44362e-119
KIF21A	0	4.80636	0.769	0.054	0
TET1	1.55877e-257	4.79714	0.655	0.034	2.83073e-253
UBAP2	0	4.79678	0.913	0.097	0
FRAS1	0	4.79175	0.822	0.072	0
FILIP1L	5.73924e-281	4.78789	0.711	0.057	1.04225e-276
AMMECR1	0	4.78784	0.761	0.048	0
ZNF438	5.68854e-177	4.7725	0.505	0.022	1.03304e-172
TENM4	3.03038e-241	4.74094	0.664	0.063	5.50318e-237
CTDSPL	0	4.73615	0.838	0.075	0
KDELR3	1.08131e-83	4.73005	0.27	0.009	1.96367e-79
ITM2A	2.36679e-182	4.71754	0.513	0.021	4.29809e-178
ARHGAP31	2.2886e-121	4.71167	0.382	0.017	4.15609e-117
TSNARE1	0	4.70018	0.889	0.093	0
PIK3CB	0	4.69489	0.911	0.129	0
CHRNA4	1.0758e-150	4.67173	0.447	0.018	1.95366e-146
STK26	1.01541e-135	4.65682	0.407	0.015	1.84398e-131
UTRN	0	4.63366	0.988	0.208	0
PRKAG2	0	4.62369	0.761	0.053	0
HSD17B12	0	4.60308	0.945	0.179	0
HECW2	1.64382e-111	4.59304	0.351	0.014	2.98517e-107
ANAPC10	1.10131e-146	4.58416	0.456	0.028	1.99997e-142
GOLIM4	0	4.57556	0.901	0.103	0
ATP8B4	2.19468e-94	4.57555	0.296	0.009	3.98554e-90
ZFYVE28	1.5672e-221	4.5704	0.632	0.061	2.84603e-217
HOXA6	9.93082e-291	4.57005	0.72	0.05	1.80344e-286
EPS8	2.713e-139	4.56702	0.429	0.021	4.9268e-135
AR	4.56155e-145	4.55841	0.448	0.025	8.28378e-141
SLITRK4	0	4.55461	0.817	0.093	0
VEGFC	2.34053e-112	4.54921	0.374	0.025	4.2504e-108
SLC45A1	1.12762e-85	4.54622	0.278	0.01	2.04776e-81
RAB33A	3.3532e-76	4.53797	0.251	0.009	6.08942e-72
PRSS35	2.45635e-87	4.53103	0.286	0.011	4.46074e-83
BACH2	8.01065e-113	4.49776	0.37	0.021	1.45473e-108
PLCE1	1.05226e-88	4.49376	0.272	0.006	1.91091e-84
GMDS	1.23244e-199	4.48119	0.583	0.047	2.23811e-195
FGGY	1.89344e-219	4.47816	0.608	0.039	3.43848e-215
ABCC4	8.19726e-120	4.45018	0.379	0.017	1.48862e-115
SLC9A9	1.75721e-71	4.43683	0.255	0.016	3.19109e-67
ADGRL3	0	4.43664	0.906	0.152	0
GPC2	3.116e-79	4.41434	0.269	0.012	5.65866e-75
LCLAT1	2.03038505690962e-314	4.36768	0.754	0.055	3.68717926334788e-310
FRY	1.1041e-78	4.35254	0.264	0.011	2.00505e-74
TMEM241	2.19484e-111	4.35121	0.366	0.02	3.98583e-107
CDK8	0	4.33393	0.855	0.102	0
FRMD3	1.85127879693653e-318	4.33261	0.784	0.092	3.36192229523673e-314
YY2	8.03406e-110	4.31056	0.363	0.021	1.45898e-105
SUGCT	6.17248e-208	4.30099	0.617	0.065	1.12092e-203
BACE2	4.13531e-195	4.28974	0.588	0.055	7.50973e-191
TCF7L2	0	4.28572	0.968	0.198	0
MOB3B	1.31604266082733e-318	4.27375	0.781	0.082	2.38993347206243e-314
MGAT3	5.19375e-78	4.27222	0.269	0.014	9.43185e-74
MAP4K4	0	4.27058	0.863	0.096	0
ADK	0	4.26659	0.923	0.143	0
ANK3	6.96838e-103	4.2631	0.354	0.023	1.26546e-98
PELI1	1.60834e-92	4.24953	0.302	0.012	2.92074e-88
SUFU	5.21662e-207	4.23444	0.594	0.043	9.47338e-203
BANP	1.83216e-124	4.23434	0.41	0.027	3.32721e-120
OSR2	1.52172218919104e-321	4.23042	0.781	0.08	2.76344749557093e-317
GHR	2.04739e-298	4.225	0.762	0.09	3.71807e-294
FSTL4	8.71353e-97	4.22427	0.342	0.025	1.58238e-92
KLHL29	0	4.21289	0.881	0.152	0
MAPK11	3.23283e-115	4.20957	0.359	0.014	5.87082e-111
RAI2	0	4.20866	0.95	0.176	0
MPP4	3.97591e-75	4.2045	0.262	0.014	7.22025e-71
ARID1B	0	4.19957	0.987	0.257	0
ENTPD1	0	4.19306	0.801	0.102	0
SEMA4G	3.45133e-252	4.18845	0.665	0.043	6.26761e-248
ROR2	2.06757e-209	4.18817	0.636	0.079	3.7547e-205
STARD13	0	4.17975	0.866	0.166	0
KLF12	8.93952e-295	4.17903	0.761	0.091	1.62342e-290
ARL15	0	4.17232	0.917	0.235	0
PER2	1.55792e-210	4.1639	0.613	0.052	2.82919e-206
MAD1L1	3.40496e-178	4.13666	0.54	0.039	6.1834e-174
TBL1X	0	4.13537	0.82	0.088	0
ROBO1	0	4.12878	0.891	0.215	0
HOXA3	1.82555e-160	4.12763	0.502	0.036	3.3152e-156
TIAM2	8.86267e-116	4.11531	0.401	0.033	1.60946e-111
LRIG3	3.50308e-141	4.11086	0.454	0.031	6.36159e-137
GRB10	0	4.10972	0.892	0.131	0
NAV3	0	4.0977	0.91	0.158	0
SLC37A4	8.9753e-275	4.09478	0.741	0.088	1.62991e-270
SYNJ2	2.52702e-98	4.09184	0.338	0.021	4.58907e-94
CHGA	4.29424e-104	4.0904	0.352	0.021	7.79833e-100
KIAA1841	4.627e-86	4.08848	0.302	0.018	8.40263e-82
PPP4R4	4.59481050632359e-322	4.06514	0.793	0.09	8.34417587948364e-318
RBMS3	0	4.06363	0.983	0.247	0
DCHS1	1.31623e-129	4.06103	0.418	0.025	2.39027e-125
TUBB6	2.15362e-85	4.03208	0.295	0.016	3.91097e-81
ATP5PO	1.04405e-94	4.0288	0.334	0.023	1.89599e-90
STX1A	5.09664e-78	4.02449	0.269	0.014	9.2555e-74
EEFSEC	1.45126e-136	4.01757	0.45	0.033	2.6355e-132
AUTS2	0	3.989	0.97	0.273	0
SLC43A2	2.04307e-118	3.98857	0.407	0.032	3.71021e-114
TIAM1	8.30776e-84	3.98701	0.291	0.016	1.50869e-79
CHRDL1	7.90608e-92	3.98618	0.295	0.011	1.43574e-87
ARVCF	7.9852e-219	3.98487	0.632	0.055	1.45011e-214
MAP7D3	1.94317e-230	3.9828	0.655	0.061	3.52879e-226
PRKAR2A	0	3.96705	0.925	0.171	0
TXNL4B	1.34405e-204	3.96562	0.607	0.053	2.4408e-200
JADE3	0	3.95452	0.808	0.097	0
MITF	2.1884e-129	3.94539	0.423	0.027	3.97414e-125
BCAS3	0	3.94477	0.888	0.133	0
LDLRAD3	1.29221e-82	3.91973	0.294	0.018	2.34665e-78
DMD	0	3.91423	0.987	0.387	0
CACNB2	0	3.9097	0.998	0.528	0
FIBIN	1.23018e-105	3.90223	0.353	0.02	2.234e-101
TRANK1	5.48584e-165	3.89765	0.529	0.047	9.96229e-161
FAM135A	4.0207e-221	3.89548	0.653	0.071	7.30159e-217
PRKACB	8.93959e-290	3.89102	0.765	0.104	1.62343e-285
RBMS1	1.42417e-305	3.87678	0.79	0.106	2.58629e-301
KCNMA1	0	3.86324	0.888	0.203	0
PUS10	2.36153e-120	3.84627	0.412	0.032	4.28854e-116
RAPGEF5	1.65396e-162	3.84097	0.516	0.041	3.00359e-158
LRATD1	0	3.83839	0.841	0.134	0
LRP12	9.93415e-218	3.82872	0.658	0.082	1.80404e-213
AGTPBP1	1.82352e-153	3.82433	0.514	0.053	3.31151e-149
TSPAN4	2.50489e-173	3.8187	0.563	0.06	4.54889e-169
DSEL	2.71108e-102	3.8176	0.378	0.037	4.92332e-98
CALM1	1.41867e-133	3.81514	0.467	0.048	2.5763e-129
CAMK2G	4.32987e-217	3.80367	0.643	0.065	7.86305e-213
ENPP2	6.161e-151	3.79955	0.504	0.047	1.11884e-146
CPPED1	3.37377e-144	3.79499	0.478	0.039	6.12677e-140
NBEA	2.22824e-306	3.78326	0.8	0.129	4.04648e-302
ZNF521	0	3.78126	0.987	0.37	0
PPAT	1.64381e-269	3.77744	0.751	0.107	2.98516e-265
LOXL3	3.28947e-95	3.77321	0.337	0.023	5.97367e-91
NET1	1.20924e-74	3.77073	0.276	0.02	2.19598e-70
DIAPH2	6.13018e-303	3.76233	0.786	0.103	1.11324e-298
XRCC4	2.35853e-91	3.75785	0.35	0.036	4.2831e-87
OSBPL10	1.4103e-135	3.7517	0.474	0.048	2.56111e-131
FHIT	4.09086e-185	3.74981	0.625	0.097	7.42901e-181
RAMP2	2.17787e-105	3.74546	0.364	0.025	3.95501e-101
PSIP1	3.11218e-196	3.74254	0.656	0.112	5.65171e-192
NR6A1	5.69357e-70	3.7345	0.264	0.02	1.03395e-65
MAGI3	1.45719e-139	3.72636	0.462	0.036	2.64625e-135
ZMIZ1	0	3.72297	0.912	0.201	0
THNSL1	4.51188e-143	3.71785	0.484	0.045	8.19357e-139
STK3	4.52075e-304	3.71573	0.8	0.119	8.20968e-300
VTI1A	6.55179e-304	3.71533	0.803	0.143	1.1898e-299
SKI	0	3.71506	0.851	0.149	0
FDPS	3.59561e-258	3.70649	0.743	0.113	6.52962e-254
MAPK12	1.33001e-84	3.70443	0.308	0.022	2.4153e-80
ADGRL2	0	3.69445	0.897	0.199	0
CDK19	2.43795e-104	3.69351	0.37	0.028	4.42731e-100
RAVER1	0	3.68035	0.858	0.136	0
SLC44A3	2.57198e-83	3.68031	0.292	0.017	4.67071e-79
ZNF217	1.21986e-149	3.67863	0.509	0.052	2.21526e-145
TMEM135	5.7408e-231	3.67559	0.686	0.087	1.04253e-226
MAP7	3.73214e-229	3.67426	0.694	0.098	6.77756e-225
CFAP69	1.63543e-94	3.67388	0.359	0.036	2.96994e-90
EMP2	1.31651e-75	3.67371	0.288	0.023	2.39079e-71
MBOAT2	2.75595e-115	3.66029	0.407	0.034	5.0048e-111
STOX2	1.68029e-88	3.65502	0.346	0.037	3.05141e-84
SYNJ1	1.74568e-176	3.6533	0.558	0.05	3.17016e-172
ELOVL6	1.02447e-138	3.65137	0.481	0.048	1.86045e-134
RASD1	4.3639e-198	3.64625	0.606	0.058	7.92485e-194
TBC1D32	2.57209e-93	3.64379	0.355	0.036	4.67092e-89
NEDD9	1.4182e-78	3.62777	0.293	0.022	2.57544e-74
MMD	4.41811e-114	3.61496	0.416	0.041	8.02328e-110
C2CD5	0	3.61258	0.89	0.204	0
GPHN	0	3.60591	0.844	0.154	0
POU2F1	1.54052e-236	3.60565	0.699	0.09	2.79759e-232
PPIA	3.61041e-172	3.59791	0.58	0.072	6.55651e-168
ABLIM1	0	3.59576	0.98	0.3	0
RAD51B	7.39946e-255	3.56599	0.759	0.139	1.34374e-250
NAV2	1.49443e-104	3.56368	0.395	0.042	2.71388e-100
BEND5	3.16321e-101	3.56189	0.392	0.044	5.74439e-97
ZCCHC24	3.79628e-129	3.54605	0.481	0.06	6.89404e-125
ZC3H13	0	3.53655	0.856	0.173	0
SPOPL	2.08256e-183	3.53454	0.596	0.069	3.78192e-179
TMEM131L	1.5241e-103	3.53211	0.376	0.032	2.76776e-99
SCFD2	8.57641e-165	3.53202	0.581	0.091	1.55748e-160
FAM49A	1.39101e-78	3.51143	0.319	0.036	2.52607e-74
SLC22A23	1.7912e-108	3.51116	0.439	0.068	3.25282e-104
ZBED4	1.97264e-65	3.50725	0.26	0.023	3.58232e-61
CYB5A	7.41523e-280	3.50288	0.787	0.139	1.34661e-275
LPCAT1	0	3.50255	0.876	0.177	0
GTDC1	4.95229e-213	3.50245	0.668	0.092	8.99336e-209
STS	6.51485e-123	3.50083	0.461	0.055	1.1831e-118
ABCC9	2.26715e-139	3.4947	0.476	0.043	4.11714e-135
STEAP2	7.51383e-119	3.49376	0.418	0.036	1.36451e-114
SENP7	3.41922e-186	3.48759	0.607	0.074	6.20931e-182
ATP11C	3.3103e-186	3.48463	0.608	0.074	6.0115e-182
FBXW11	3.89564e-278	3.48142	0.784	0.136	7.07449e-274
APBB2	8.15651e-139	3.47907	0.499	0.059	1.48122e-134
AFG1L	7.9111e-88	3.47871	0.347	0.037	1.43666e-83
SLC24A3	4.52817e-270	3.47543	0.771	0.138	8.22316e-266
GNE	2.76786e-191	3.47421	0.614	0.072	5.02643e-187
LPIN2	2.78179e-188	3.46007	0.624	0.086	5.05173e-184
GAS6	7.82898e-109	3.44952	0.416	0.048	1.42174e-104
FAM149B1	9.61563e-64	3.44443	0.253	0.022	1.7462e-59
MCC	1.42368e-78	3.44251	0.324	0.038	2.5854e-74
IGF1R	0	3.43779	0.899	0.281	0
TULP4	2.44616e-207	3.43435	0.672	0.106	4.44223e-203
CDYL	2.12184e-196	3.43094	0.648	0.102	3.85326e-192
DLG2	2.65569e-179	3.42204	0.69	0.195	4.82273e-175
ASPG	5.14311e-104	3.41858	0.38	0.033	9.33989e-100
WWC2	1.63897e-212	3.41195	0.678	0.101	2.97637e-208
THSD4	1.08641e-219	3.40986	0.71	0.131	1.97293e-215
PLCB1	0	3.40921	0.971	0.333	0
B3GLCT	7.55156e-99	3.39927	0.375	0.037	1.37136e-94
SLC25A24	3.67247e-188	3.39878	0.626	0.087	6.66921e-184
LBR	2.23078e-120	3.39766	0.455	0.055	4.0511e-116
HMGCS1	4.5675e-223	3.3899	0.747	0.183	8.29458e-219
AGTR1	0	3.38702	0.931	0.364	0
CHST11	1.02837e-60	3.3845	0.26	0.029	1.86752e-56
ZNF516	0	3.38164	0.94	0.292	0
RFTN2	5.71612e-108	3.37641	0.418	0.049	1.03805e-103
GNB4	3.91062e-89	3.35768	0.333	0.028	7.10168e-85
RALGPS1	9.01651e-133	3.35738	0.463	0.043	1.6374e-128
SINHCAF	1.27174e-151	3.3564	0.512	0.049	2.30948e-147
ZRSR2	7.30675e-68	3.34888	0.267	0.023	1.32691e-63
CCDC91	0	3.33027	0.874	0.224	0
AKAP12	1.00778e-116	3.32489	0.445	0.053	1.83013e-112
DTNBP1	6.52303e-102	3.3211	0.409	0.053	1.18458e-97
ZNF407	0	3.32098	0.884	0.246	0
NADK2	4.71413e-275	3.31248	0.813	0.201	8.56086e-271
KCTD1	2.50415e-171	3.31128	0.601	0.091	4.54753e-167
ABLIM2	7.43768e-235	3.3109	0.713	0.101	1.35068e-230
MIPOL1	3.91322e-147	3.30476	0.535	0.071	7.10641e-143
SLC38A1	8.97577e-66	3.30109	0.267	0.026	1.63e-61
CXXC5	3.85025e-118	3.29789	0.452	0.055	6.99205e-114
RBM10	0	3.29111	0.95	0.263	0
LARGE1	4.88596e-187	3.28763	0.642	0.103	8.87291e-183
USP54	1.83483e-144	3.28576	0.514	0.059	3.33205e-140
RAD23B	7.51107e-263	3.28278	0.786	0.166	1.36401e-258
EXT1	0	3.28069	0.976	0.407	0
THRB	6.399e-188	3.27692	0.679	0.152	1.16206e-183
TGFBR3	0	3.27276	0.983	0.502	0
DOCK1	0	3.26894	0.945	0.263	0
RIPOR3	2.04311e-91	3.26258	0.347	0.032	3.71028e-87
SPATA5	4.44756e-141	3.26046	0.537	0.082	8.07676e-137
CAMKMT	4.35363e-74	3.25807	0.335	0.052	7.9062e-70
SNX24	5.46497e-122	3.25604	0.484	0.074	9.92438e-118
PRICKLE2	1.18999e-115	3.25544	0.462	0.068	2.16102e-111
MBNL3	8.2577e-274	3.2518	0.794	0.152	1.4996e-269
RUNX1T1	2.64835e-130	3.24994	0.521	0.088	4.8094e-126
CDKAL1	0	3.24593	0.894	0.205	0
LDB2	1.14982e-75	3.24301	0.335	0.048	2.08808e-71
SNX29	1.25227e-132	3.23461	0.484	0.055	2.27412e-128
TLCD4	3.59223e-192	3.23127	0.678	0.133	6.52349e-188
TRPS1	2.63757e-179	3.22589	0.675	0.172	4.78983e-175
GINS3	1.38501e-80	3.22227	0.321	0.033	2.51518e-76
SAMD12	1.79501e-220	3.22143	0.72	0.134	3.25974e-216
CUX1	0	3.21925	0.927	0.23	0
CHST15	3.89953e-80	3.20598	0.337	0.042	7.08155e-76
PPP3CA	0	3.20384	0.922	0.305	0
WDR7	1.13726e-92	3.18989	0.369	0.042	2.06526e-88
PARD3B	4.96782e-270	3.18864	0.789	0.144	9.02156e-266
CCAR1	4.71754e-126	3.18332	0.472	0.057	8.56706e-122
LRCH1	4.32647e-164	3.17998	0.58	0.08	7.85687e-160
SNX7	3.14753e-138	3.17385	0.506	0.061	5.71592e-134
USP45	8.18737e-179	3.16265	0.604	0.077	1.48683e-174
ETV6	4.58461e-243	3.15216	0.774	0.17	8.32566e-239
SBF2	1.67236e-299	3.14649	0.82	0.147	3.037e-295
TLE4	1.82175e-169	3.14559	0.653	0.155	3.3083e-165
SRPK2	4.47798e-304	3.13478	0.849	0.197	8.13202e-300
APOO	1.18177e-87	3.13349	0.345	0.036	2.1461e-83
NR3C2	4.21944e-212	3.13159	0.737	0.177	7.66251e-208
EIF4EBP1	6.7001e-84	3.13115	0.336	0.036	1.21674e-79
CYB5R2	1.43292e-113	3.12834	0.435	0.05	2.60219e-109
NR2F2	0	3.12358	0.938	0.312	0
PARD3	0	3.11227	0.925	0.28	0
AGRN	3.14879e-90	3.10677	0.332	0.028	5.71821e-86
ID2	1.08708e-286	3.10389	0.836	0.206	1.97415e-282
CASP8	1.24594e-125	3.10311	0.501	0.08	2.26263e-121
KIAA0825	2.6992e-88	3.09653	0.386	0.058	4.90175e-84
FBRSL1	0	3.09467	0.94	0.313	0
METTL25	8.7712e-168	3.09202	0.624	0.115	1.59285e-163
PDE7A	5.52937e-109	3.08978	0.413	0.044	1.00413e-104
DOCK4	5.39293e-179	3.08936	0.654	0.123	9.79356e-175
TBC1D9	4.97259e-105	3.08313	0.416	0.05	9.03022e-101
CACNA1H	0	3.08277	0.902	0.314	0
AFAP1	2.59391e-95	3.07894	0.413	0.064	4.71054e-91
EIF4EBP3	6.58703e-186	3.07427	0.642	0.101	1.1962e-181
IFT122	5.80866e-124	3.04283	0.487	0.07	1.05485e-119
ZNF536	4.32754e-181	3.04274	0.67	0.138	7.85881e-177
CCDC71L	6.8705e-100	3.03993	0.394	0.045	1.24768e-95
TMCC1	9.86075e-125	3.03011	0.508	0.084	1.79071e-120
KLHL9	1.78845e-89	3.02547	0.362	0.042	3.24783e-85
FIGN	4.22305e-125	3.02503	0.512	0.086	7.66905e-121
CDK17	1.51147e-170	3.02332	0.613	0.096	2.74483e-166
H3F3B	6.11385e-82	3.02283	0.348	0.044	1.11028e-77
UBE2W	7.21704e-249	3.00297	0.786	0.176	1.31061e-244
TEF	2.48569e-114	2.99888	0.468	0.07	4.51401e-110
ANKH	1.33931e-75	2.99235	0.344	0.052	2.43219e-71
FNIP2	2.12194e-83	2.98515	0.367	0.053	3.85344e-79
ACVR2A	3.65391e-95	2.98328	0.41	0.061	6.63549e-91
TBC1D5	0	2.98251	0.897	0.285	0
KDM6A	5.02044e-308	2.97984	0.857	0.2	9.11713e-304
MLLT3	1.21915e-184	2.9794	0.724	0.224	2.21397e-180
ZNF821	3.76828e-84	2.97573	0.338	0.037	6.8432e-80
MEF2A	0	2.97101	0.892	0.237	0
BAZ1A	8.06715e-113	2.96496	0.468	0.072	1.46499e-108
TRERF1	2.3403e-182	2.96373	0.674	0.139	4.24998e-178
CHCHD10	1.32913e-245	2.96202	0.792	0.179	2.4137e-241
PPDPF	1.33507e-96	2.9602	0.448	0.088	2.42449e-92
ITGA8	8.05073e-66	2.9587	0.311	0.048	1.46201e-61
THSD7A	8.57373e-77	2.94918	0.425	0.12	1.55699e-72
ZFAT	1.17702e-59	2.94592	0.271	0.036	2.13747e-55
TMTC1	1.18522e-102	2.93997	0.447	0.072	2.15237e-98
IL11RA	5.29266e-121	2.93247	0.499	0.08	9.61148e-117
EFEMP1	1.86938e-66	2.92936	0.315	0.049	3.39479e-62
ADD3	4.43261e-118	2.92469	0.51	0.097	8.04961e-114
DENND1A	1.40623e-288	2.91259	0.838	0.193	2.55372e-284
XPO1	1.78553e-151	2.90662	0.595	0.111	3.24252e-147
ARID2	7.28883e-229	2.90418	0.761	0.165	1.32365e-224
UNC13B	3.07282e-83	2.90399	0.415	0.088	5.58024e-79
GPC4	4.77868e-175	2.90109	0.666	0.143	8.67809e-171
BCL9	2.29369e-111	2.88336	0.454	0.064	4.16533e-107
HYKK	1.31306e-56	2.88054	0.262	0.036	2.38452e-52
ZEB1	5.78993e-146	2.87971	0.582	0.107	1.05145e-141
CRIM1	3.41884e-234	2.87312	0.787	0.2	6.20861e-230
GHITM	6.01508e-242	2.87084	0.823	0.267	1.09234e-237
ZFHX3	1.06026271196779e-315	2.8698	0.891	0.291	1.9254370849335e-311
HOXA9	1.38356e-88	2.86976	0.405	0.068	2.51255e-84
SMAD7	4.47994e-69	2.86966	0.367	0.077	8.13557e-65
DENND1B	1.28419e-89	2.86448	0.4	0.063	2.33209e-85
NEDD4	2.22128e-82	2.85663	0.356	0.048	4.03385e-78
PAPOLA	4.07415e-294	2.85518	0.857	0.246	7.39866e-290
CCDC85C	9.44179e-141	2.84052	0.593	0.131	1.71463e-136
PHF20	5.50121e-127	2.83366	0.511	0.08	9.99019e-123
AACS	2.041e-134	2.83344	0.581	0.127	3.70646e-130
PCGF6	1.43226e-68	2.82464	0.298	0.037	2.60099e-64
SGF29	1.90873e-148	2.8214	0.58	0.1	3.46626e-144
PHF14	1.40932e-229	2.81766	0.784	0.203	2.55933e-225
PDE8A	0	2.81554	0.966	0.464	0
TMEM65	1.26677e-51	2.81038	0.25	0.037	2.30046e-47
PEPD	1.49512e-220	2.80346	0.781	0.217	2.71513e-216
MICU2	3.49342e-197	2.80262	0.718	0.163	6.34405e-193
COMMD10	5.42054e-104	2.79837	0.486	0.101	9.8437e-100
REV3L	2.55674e-155	2.7964	0.609	0.117	4.64304e-151
IGFBP2	7.06267e-290	2.79558	0.883	0.29	1.28258e-285
CARNMT1	7.26568e-98	2.79378	0.436	0.072	1.31945e-93
SLC44A5	3.96285e-101	2.79187	0.462	0.087	7.19654e-97
ZNF207	1.69287e-127	2.79019	0.53	0.092	3.07424e-123
XKR6	8.68449e-184	2.78706	0.693	0.154	1.5771e-179
CLYBL	1.30666e-67	2.78588	0.341	0.065	2.37289e-63
CYB561D2	2.2712e-123	2.77982	0.518	0.09	4.1245e-119
KNTC1	2.14276e-117	2.77844	0.521	0.103	3.89126e-113
NME1	2.10149e-135	2.77318	0.585	0.129	3.8163e-131
TBC1D8	1.80628e-114	2.77186	0.484	0.079	3.2802e-110
RALGAPA1	9.49096e-254	2.76733	0.834	0.247	1.72356e-249
MED13L	2.71631e-235	2.76462	0.796	0.214	4.93282e-231
WAC	6.30493e-145	2.76382	0.573	0.098	1.14497e-140
CELF2	4.31393e-65	2.75909	0.371	0.092	7.83409e-61
PKNOX1	1.56523e-64	2.75701	0.302	0.044	2.84246e-60
TET2	5.17457e-137	2.75508	0.583	0.122	9.39701e-133
ACLY	1.44271e-85	2.75414	0.417	0.081	2.61996e-81
FAM13A	3.57418e-284	2.75197	0.864	0.27	6.49071e-280
SYNCRIP	2.64533e-73	2.73789	0.326	0.044	4.80392e-69
AGK	9.43729e-82	2.73579	0.362	0.052	1.71381e-77
MEIS2	0	2.7273	0.953	0.49	0
ZC3H8	3.70329e-55	2.72536	0.261	0.037	6.72517e-51
PDS5A	8.55387e-103	2.72177	0.46	0.081	1.55338e-98
BMP2K	9.99773e-83	2.7186	0.385	0.064	1.81559e-78
GSTA3	1.44241e-54	2.71451	0.27	0.043	2.61941e-50
CCBE1	2.44536e-50	2.71233	0.259	0.043	4.44077e-46
SLC4A7	1.57938e-140	2.70627	0.6	0.13	2.86815e-136
RAPGEF2	1.04452e-177	2.70472	0.694	0.162	1.89685e-173
DACH1	0	2.6971	0.987	0.654	0
OSBPL1A	4.92073e-90	2.69538	0.415	0.071	8.93604e-86
ZBTB46	6.62535e-71	2.675	0.305	0.038	1.20316e-66
TMX3	1.19971e-52	2.67268	0.258	0.039	2.17867e-48
PTPRM	1.35404e-136	2.6725	0.619	0.162	2.45893e-132
CDK14	6.4026e-53	2.66661	0.298	0.065	1.16271e-48
ZNF618	8.14171e-211	2.66464	0.777	0.225	1.47853e-206
SLC10A7	4.00369e-107	2.66036	0.475	0.084	7.2707e-103
BCL7A	1.54942e-74	2.65802	0.351	0.057	2.81374e-70
SQLE	1.52235e-61	2.65658	0.296	0.045	2.76458e-57
PPP2R3A	2.03635e-178	2.64197	0.68	0.141	3.698e-174
ZMYND11	1.21087276633544e-310	2.64066	0.895	0.302	2.19894e-306
MAST4	0	2.63948	0.939	0.386	0
BAG3	6.81008e-98	2.63891	0.474	0.1	1.23671e-93
GPATCH11	1.55247e-53	2.63751	0.275	0.047	2.81929e-49
NRIP1	1.56826e-247	2.63529	0.842	0.274	2.84795e-243
SRSF11	1.31661e-281	2.63261	0.866	0.252	2.39096e-277
TEAD1	1.414e-114	2.63222	0.524	0.109	2.56782e-110
RBPJ	2.38755e-121	2.63049	0.547	0.117	4.33579e-117
C2CD2L	7.27939e-86	2.61913	0.39	0.061	1.32194e-81
GRAMD4	1.16732e-132	2.61737	0.587	0.134	2.11985e-128
COP1	3.54814e-124	2.61707	0.543	0.106	6.44342e-120
FAM172A	1.51593e-194	2.61402	0.756	0.233	2.75293e-190
FOXN3	1.56103e-285	2.6129	0.882	0.312	2.83483e-281
PFKFB2	3.39516e-52	2.61254	0.25	0.036	6.1656e-48
RNASEH2B	2.28298e-81	2.6013	0.394	0.071	4.14589e-77
POLA1	1.40228e-73	2.60106	0.382	0.077	2.54655e-69
PPP2R5E	4.22336e-196	2.59478	0.743	0.19	7.66962e-192
CEP170B	2.35014e-141	2.59427	0.592	0.118	4.26785e-137
C21orf91	2.73338e-120	2.59323	0.542	0.112	4.96381e-116
PHIP	3.176e-160	2.58832	0.65	0.139	5.76762e-156
CHD7	2.1029e-110	2.5818	0.527	0.117	3.81886e-106
HDAC11	1.65849e-49	2.57676	0.256	0.043	3.01181e-45
SFSWAP	2.73052e-145	2.57665	0.612	0.134	4.95863e-141
BORCS6	1.5511e-60	2.57454	0.298	0.048	2.81679e-56
SUPT3H	5.66481e-100	2.57124	0.495	0.112	1.02873e-95
HIPK2	0	2.5637	0.939	0.397	0
GLI3	7.81509e-154	2.55693	0.667	0.176	1.41922e-149
C12orf4	5.91602e-61	2.55214	0.306	0.052	1.07435e-56
MAN1A2	2.47808e-116	2.54367	0.534	0.114	4.50019e-112
CTSO	4.75106e-150	2.54149	0.66	0.178	8.62792e-146
EP400	6.94852e-55	2.53162	0.257	0.036	1.26185e-50
WWOX	3.08122e-142	2.52487	0.713	0.343	5.5955e-138
SRGAP3	1.26252e-89	2.5231	0.416	0.071	2.29273e-85
TNS3	1.20139e-209	2.51707	0.774	0.208	2.18172e-205
EFL1	3.59989e-97	2.51633	0.452	0.082	6.5374e-93
CEP295	3.0627e-69	2.51457	0.343	0.06	5.56187e-65
SHB	5.4268e-52	2.51224	0.266	0.044	9.85507e-48
AGL	1.7486e-136	2.51203	0.602	0.135	3.17547e-132
BRSK1	7.20533e-137	2.51092	0.665	0.222	1.30849e-132
ANKIB1	2.24414e-112	2.51079	0.528	0.115	4.07536e-108
ADCY6	1.49001e-124	2.50529	0.681	0.269	2.70586e-120
KDM7A	1.81871e-55	2.50014	0.283	0.048	3.30278e-51
UPF2	8.23132e-144	2.49727	0.604	0.123	1.49481e-139
FBXO34	1.56082e-130	2.4958	0.586	0.133	2.83445e-126
TBC1D22A	2.50099e-142	2.49549	0.628	0.151	4.54179e-138
RCAN1	9.05318e-57	2.49516	0.307	0.06	1.64406e-52
BOD1L1	7.34916e-130	2.49172	0.597	0.145	1.33461e-125
FAM168A	1.67863e-140	2.49023	0.629	0.158	3.04839e-136
CAMK2D	3.20696e-158	2.48895	0.69	0.194	5.82385e-154
TRPM3	2.20213e-43	2.4871	0.343	0.139	3.99907e-39
SPATS2L	5.66887e-70	2.48094	0.344	0.059	1.02947e-65
MEGF10	1.91109e-145	2.48068	0.671	0.189	3.47054e-141
ANP32A	1.38052e-61	2.47575	0.323	0.06	2.50703e-57
VPS13D	4.38628e-120	2.46984	0.538	0.108	7.96548e-116
EML4	0	2.46732	0.949	0.467	0
RALGAPA2	2.0516e-90	2.46573	0.439	0.085	3.7257e-86
TCP11L1	1.24728e-66	2.46396	0.337	0.06	2.26506e-62
IKZF2	8.66374e-59	2.46305	0.297	0.05	1.57334e-54
WDR89	1.0508e-83	2.46271	0.407	0.075	1.90825e-79
THOC2	2.07803e-207	2.45774	0.778	0.215	3.77371e-203
PRKD1	1.64975e-119	2.45269	0.583	0.15	2.99595e-115
INO80	2.39537e-109	2.4505	0.514	0.107	4.35e-105
RASSF8	2.45015e-189	2.44892	0.771	0.253	4.44948e-185
JAKMIP2	3.42984e-49	2.44755	0.255	0.043	6.22859e-45
KCNQ1	7.10771e-266	2.44504	0.918	0.555	1.29076e-261
MNAT1	2.12733e-109	2.44324	0.52	0.112	3.86322e-105
APC	3.1733e-108	2.44261	0.525	0.119	5.76272e-104
MAP9	1.6878e-53	2.43876	0.303	0.064	3.06504e-49
DMXL2	3.51727e-136	2.43853	0.613	0.146	6.38737e-132
AGAP1	1.66378e-243	2.43292	0.845	0.27	3.02143e-239
ATF7IP	3.62981e-202	2.43178	0.802	0.287	6.59174e-198
ANKRD28	3.19571e-111	2.4308	0.553	0.14	5.80341e-107
MGLL	1.70249e-68	2.42933	0.361	0.072	3.09172e-64
MADD	7.91424e-176	2.42715	0.745	0.236	1.43723e-171
HLCS	2.35979e-140	2.426	0.675	0.215	4.28537e-136
CDC27	4.61696e-98	2.42339	0.459	0.086	8.3844e-94
DYNC1H1	2.84495e-126	2.42051	0.59	0.144	5.16642e-122
PIK3R1	7.66547e-90	2.41833	0.487	0.123	1.39205e-85
LRRC28	9.65006e-75	2.4081	0.396	0.084	1.75245e-70
ATP11B	6.64412e-175	2.40627	0.728	0.216	1.20657e-170
MEIS1	0	2.40511	0.987	0.67	0
CMTM4	7.58877e-67	2.40475	0.365	0.079	1.37812e-62
ZFX	9.75817e-65	2.39956	0.336	0.063	1.77208e-60
SUCLA2	4.69986e-73	2.39934	0.377	0.074	8.53495e-69
TANC1	3.71453e-123	2.3983	0.574	0.133	6.74559e-119
GSPT2	1.45563e-48	2.39447	0.26	0.047	2.64342e-44
MYO6	8.96645e-166	2.39417	0.702	0.188	1.62831e-161
HSP90AA1	0	2.38559	0.99	0.657	0
GAB1	2.55821e-97	2.38528	0.49	0.109	4.64571e-93
RSRC1	4.26444e-128	2.37236	0.607	0.155	7.74423e-124
PTPRG	1.35862e-249	2.37019	0.879	0.36	2.46726e-245
CTDP1	2.09553e-106	2.3695	0.522	0.118	3.80549e-102
SORL1	2.73765e-55	2.3668	0.256	0.037	4.97157e-51
HDAC4	7.31075e-257	2.36223	0.877	0.303	1.32763e-252
RBM39	1.26124e-244	2.3611	0.854	0.292	2.29041e-240
ARID3B	4.68409e-53	2.35932	0.264	0.042	8.50631e-49
RMDN2	4.81862e-257	2.35533	0.901	0.414	8.75062e-253
ATE1	1.13151e-85	2.35507	0.461	0.112	2.05483e-81
RCOR1	2.53698e-82	2.35493	0.422	0.087	4.60715e-78
LCMT2	5.11474e-47	2.35216	0.255	0.047	9.28837e-43
CRPPA	5.68864e-61	2.34887	0.319	0.059	1.03306e-56
PAN3	1.11294e-193	2.3468	0.78	0.241	2.02111e-189
SWT1	6.96417e-80	2.34545	0.384	0.068	1.26469e-75
ATXN1	1.51347e-123	2.34373	0.638	0.201	2.74846e-119
FAT1	4.75199e-96	2.34012	0.469	0.096	8.62961e-92
PRIM2	1.63435e-52	2.33846	0.281	0.052	2.96798e-48
TCF12	3.07831e-217	2.33821	0.821	0.278	5.59021e-213
SLC20A2	1.84501e-80	2.33061	0.429	0.095	3.35054e-76
ZNF518B	7.12738e-67	2.32633	0.379	0.086	1.29433e-62
SPOCK1	0	2.32629	0.965	0.57	0
HMGN5	1.12988e-52	2.32546	0.279	0.05	2.05187e-48
CDK11B	2.85918e-56	2.32375	0.327	0.075	5.19227e-52
MLLT10	1.73372e-183	2.32091	0.746	0.208	3.14844e-179
PIP4K2A	2.61298e-52	2.31841	0.274	0.048	4.74517e-48
NEURL1B	4.62109e-75	2.31821	0.415	0.095	8.39191e-71
ANO10	6.59372e-44	2.30363	0.274	0.064	1.19742e-39
MSMO1	3.46806e-137	2.30349	0.662	0.19	6.29799e-133
HMGCR	8.62715e-138	2.3009	0.72	0.294	1.56669e-133
DGKH	1.21737e-58	2.30049	0.356	0.087	2.21075e-54
ZCCHC2	4.69158e-91	2.29227	0.45	0.091	8.51991e-87
FAM219A	4.27745e-81	2.29164	0.444	0.104	7.76786e-77
QKI	3.38284e-293	2.2916	0.936	0.473	6.14323e-289
LEMD3	1.6982e-84	2.2882	0.443	0.097	3.08393e-80
RBM5	0	2.28735	0.95	0.436	0
TSHZ1	7.89817e-71	2.28404	0.443	0.135	1.43431e-66
RBMX2	1.55337e-48	2.27882	0.251	0.043	2.82092e-44
PDK3	8.91853e-59	2.2788	0.317	0.061	1.61961e-54
MINDY4	1.41591e-52	2.27632	0.276	0.049	2.57129e-48
CHN1	1.10974e-49	2.27516	0.256	0.043	2.01528e-45
RAPGEF6	8.80912e-110	2.27331	0.561	0.144	1.59974e-105
RREB1	1.83666e-153	2.27126	0.706	0.222	3.33537e-149
CBLB	4.5386e-120	2.27049	0.61	0.177	8.24209e-116
AHCTF1	2.64415e-67	2.26988	0.358	0.071	4.80178e-63
C12orf75	6.76218e-98	2.26571	0.467	0.091	1.22801e-93
SMAD1	3.74208e-53	2.26185	0.298	0.06	6.79563e-49
DISC1	2.17349e-63	2.25974	0.356	0.077	3.94705e-59
ZFAND3	2.24942e-255	2.25844	0.882	0.353	4.08494e-251
CLASP2	3.06191e-195	2.25666	0.809	0.302	5.56043e-191
NFIA	3.74293e-205	2.25646	0.861	0.412	6.79717e-201
KIAA0232	1.15545e-153	2.25224	0.713	0.224	2.0983e-149
ARHGEF10	7.0942e-64	2.25211	0.36	0.079	1.28831e-59
ATP8A1	3.42215e-168	2.24734	0.75	0.252	6.21462e-164
XPR1	8.90933e-76	2.23511	0.429	0.104	1.61793e-71
DDHD1	1.28633e-80	2.23435	0.44	0.102	2.33597e-76
PAICS	3.80276e-71	2.23292	0.429	0.114	6.90581e-67
CNTRL	2.38312e-70	2.23281	0.359	0.068	4.32774e-66
RERG	1.101e-141	2.23122	0.722	0.274	1.99942e-137
HPS3	9.09015e-106	2.22805	0.535	0.128	1.65077e-101
ASCC3	1.2599e-95	2.22782	0.514	0.13	2.28797e-91
NR2F1	6.96578e-203	2.21985	0.808	0.256	1.26498e-198
TAF15	4.78503e-68	2.21865	0.394	0.095	8.68961e-64
SON	2.66892e-302	2.20884	0.937	0.453	4.84676e-298
ELL	8.91091e-42	2.20638	0.252	0.054	1.61822e-37
BRAF	2.60856e-101	2.20551	0.524	0.128	4.73714e-97
UBAC2	7.09125e-100	2.20367	0.533	0.138	1.28777e-95
NTAN1	1.77458e-52	2.20318	0.313	0.071	3.22263e-48
FBXL7	5.26906e-86	2.20099	0.551	0.203	9.56862e-82
PINX1	3.45008e-59	2.20043	0.339	0.074	6.26534e-55
CPEB2	6.21395e-63	2.19712	0.367	0.085	1.12845e-58
SMAP1	1.85795e-73	2.19351	0.428	0.108	3.37404e-69
COG5	8.67857e-129	2.19048	0.656	0.21	1.57603e-124
PDPK1	9.4534e-77	2.1864	0.409	0.087	1.71674e-72
ST3GAL3	9.71443e-152	2.1861	0.734	0.256	1.76414e-147
SGCD	9.95402e-55	2.18468	0.383	0.119	1.80765e-50
FBXO11	2.30838e-128	2.18425	0.65	0.2	4.19202e-124
PITPNC1	9.83613e-80	2.17813	0.495	0.151	1.78624e-75
NCOA3	5.64961e-83	2.178	0.471	0.122	1.02597e-78
MN1	8.05731e-43	2.17771	0.26	0.057	1.46321e-38
PRKN	2.49821e-96	2.177	0.594	0.225	4.53675e-92
CMSS1	7.47022e-97	2.16951	0.547	0.16	1.35659e-92
DNAJB6	4.80063e-68	2.16782	0.387	0.088	8.71795e-64
TDRD3	6.18094e-162	2.16458	0.738	0.236	1.12246e-157
DCUN1D1	4.90519e-92	2.16364	0.5	0.125	8.90782e-88
FBXO4	2.25625e-49	2.16248	0.271	0.052	4.09734e-45
BRD9	4.66128e-64	2.16035	0.366	0.082	8.46488e-60
JAK2	2.45381e-64	2.15206	0.402	0.107	4.45611e-60
MKS1	2.48284e-46	2.14923	0.264	0.053	4.50883e-42
MTSS1	3.72977e-134	2.14751	0.719	0.275	6.77326e-130
DDX10	5.35802e-81	2.14638	0.462	0.118	9.73016e-77
NUBPL	2.09636e-52	2.14258	0.335	0.085	3.80699e-48
KHDRBS3	8.65259e-42	2.14203	0.265	0.061	1.57131e-37
UPF3B	6.40464e-64	2.14116	0.35	0.072	1.16308e-59
LDAH	2.19612e-160	2.14085	0.747	0.252	3.98816e-156
BRWD3	1.21869e-74	2.1401	0.442	0.117	2.21314e-70
ELP4	5.25961e-55	2.13968	0.353	0.092	9.55146e-51
UBE2E2	2.72312e-43	2.13845	0.261	0.057	4.94518e-39
CEP290	3.46534e-44	2.13841	0.285	0.07	6.29306e-40
RBM23	1.03346e-222	2.13793	0.854	0.316	1.87676e-218
DHRS3	3.97772e-50	2.13746	0.337	0.092	7.22354e-46
ZNF608	2.45731e-101	2.13533	0.568	0.168	4.46247e-97
NCOA7	3.06439e-182	2.13236	0.802	0.308	5.56492e-178
UBQLN1	1.42539e-77	2.13089	0.476	0.139	2.5885e-73
PSMD14	2.92935e-45	2.13071	0.28	0.064	5.31971e-41
TMTC3	3.50468e-84	2.12949	0.467	0.114	6.3645e-80
NSD2	1.77553e-89	2.12721	0.505	0.134	3.22437e-85
RSU1	8.64076e-43	2.12644	0.301	0.086	1.56916e-38
FNBP1	3.17095e-94	2.12232	0.524	0.141	5.75845e-90
CASTOR2	1.36832e-46	2.12106	0.301	0.074	2.48487e-42
UBL3	1.72033e-119	2.11619	0.64	0.21	3.12412e-115
UBE2D2	2.0634e-101	2.1152	0.551	0.15	3.74713e-97
NCKIPSD	3.91802e-56	2.11505	0.347	0.085	7.11513e-52
TNRC6B	1.71182e-203	2.11171	0.844	0.34	3.10866e-199
TNRC6C	1.87365e-116	2.10715	0.585	0.149	3.40255e-112
PBX3	8.92636e-277	2.10143	0.951	0.569	1.62103e-272
GNPTAB	1.15036e-60	2.1003	0.324	0.064	2.08905e-56
JARID2	4.68276e-95	2.0987	0.515	0.13	8.50389e-91
MAPK3	2.60772e-89	2.09831	0.496	0.127	4.73561e-85
STK38L	1.6086e-82	2.0926	0.515	0.162	2.92122e-78
CNOT2	7.57062e-145	2.08914	0.717	0.238	1.37482e-140
LONRF3	3.65534e-62	2.08262	0.374	0.091	6.6381e-58
ATXN7L1	6.81966e-119	2.0815	0.626	0.187	1.23845e-114
FAM49B	6.82403e-95	2.08036	0.516	0.131	1.23924e-90
MSRA	1.43505e-145	2.07699	0.757	0.323	2.60605e-141
FAM171A1	1.02727e-69	2.07341	0.451	0.134	1.86552e-65
ARHGEF28	3.23703e-154	2.07335	0.767	0.296	5.87845e-150
CBFB	9.96282e-89	2.07211	0.537	0.167	1.80925e-84
SCAP	5.12318e-179	2.07054	0.827	0.357	9.3037e-175
COX7B	2.28134e-48	2.07029	0.335	0.093	4.14292e-44
MGMT	5.20624e-64	2.06372	0.442	0.145	9.45453e-60
PFDN1	7.42328e-67	2.06232	0.395	0.096	1.34807e-62
PRRG1	4.65348e-50	2.05712	0.323	0.081	8.45072e-46
CHKA	1.52339e-143	2.05606	0.728	0.262	2.76648e-139
RFX3	4.41575e-73	2.05142	0.441	0.117	8.01901e-69
PTCH1	8.459e-55	2.05075	0.297	0.059	1.53615e-50
SLC25A29	3.56674e-88	2.05021	0.471	0.109	6.4772e-84
HNRNPM	7.43655e-80	2.04983	0.473	0.128	1.35048e-75
SLC16A7	9.82214e-131	2.04468	0.766	0.404	1.7837e-126
DTNA	4.50096e-145	2.04433	0.7	0.209	8.17374e-141
PECAM1	7.56437e-46	2.04199	0.292	0.07	1.37369e-41
SNX9	8.73845e-115	2.04084	0.626	0.194	1.5869e-110
ROCK2	1.53104e-97	2.03508	0.56	0.166	2.78038e-93
NCOA1	2.1298e-118	2.03034	0.645	0.209	3.86771e-114
ARID4A	1.74736e-79	2.02741	0.485	0.138	3.17321e-75
ACACA	1.6672e-147	2.02468	0.742	0.271	3.02764e-143
ZEB2	2.69935e-232	2.02306	0.932	0.527	4.90202e-228
UBN1	1.55696e-85	2.02033	0.522	0.157	2.82745e-81
DIP2C	3.78816e-106	2.01609	0.659	0.268	6.8793e-102
PTPN2	7.51736e-68	2.0147	0.412	0.106	1.36515e-63
AFDN	1.05661e-123	2.01283	0.658	0.206	1.9188e-119
ISCA2	9.46792e-51	2.00499	0.298	0.065	1.71937e-46
ABCC5	9.74514e-113	1.99805	0.638	0.213	1.76972e-108
ZFC3H1	1.33515e-227	1.9953	0.888	0.387	2.42463e-223
PPP1R12A	6.40817e-132	1.99511	0.69	0.226	1.16372e-127
DISP1	2.07939e-36	1.98295	0.281	0.085	3.77617e-32
CNOT7	6.84371e-40	1.98141	0.263	0.064	1.24282e-35
SSBP2	1.35893e-49	1.98043	0.352	0.103	2.46782e-45
PAXBP1	3.48421e-131	1.97973	0.691	0.233	6.32732e-127
ARFGEF1	1.48836e-123	1.97965	0.673	0.224	2.70286e-119
INPP4B	1.80703e-84	1.97531	0.546	0.182	3.28157e-80
SH3D19	5.41594e-50	1.97293	0.327	0.084	9.83535e-46
DHX37	1.55532e-51	1.96913	0.32	0.076	2.82447e-47
PSPC1	2.26926e-139	1.96756	0.721	0.257	4.12097e-135
NCK2	4.80573e-69	1.96739	0.45	0.131	8.72721e-65
PPM1K	2.48739e-55	1.96569	0.362	0.096	4.51711e-51
ITPR3	1.95191e-53	1.96535	0.323	0.075	3.54467e-49
OXCT1	4.4588e-79	1.96506	0.506	0.156	8.09718e-75
HMBS	7.37088e-48	1.95855	0.304	0.074	1.33855e-43
FAF1	3.14405e-120	1.9497	0.671	0.232	5.7096e-116
HOXA7	1.27715e-49	1.94756	0.34	0.093	2.31931e-45
SH3BGRL2	2.53977e-46	1.94362	0.301	0.075	4.61223e-42
TRAPPC9	3.184e-213	1.94229	0.897	0.534	5.78214e-209
ARHGAP21	3.38812e-158	1.94195	0.786	0.317	6.15283e-154
EPN2	3.46965e-82	1.93977	0.505	0.146	6.30088e-78
CASK	3.61799e-167	1.93918	0.814	0.349	6.57026e-163
RNGTT	1.00056e-100	1.93626	0.597	0.193	1.81701e-96
SH3RF1	9.7568e-45	1.93477	0.31	0.084	1.77184e-40
PDLIM5	1.14218e-68	1.93328	0.438	0.123	2.0742e-64
STAM	6.41813e-63	1.92996	0.376	0.091	1.16553e-58
GULP1	5.89038e-91	1.92977	0.609	0.253	1.06969e-86
CSNK1G1	1.74449e-52	1.92025	0.314	0.071	3.168e-48
NSMF	4.30165e-63	1.91994	0.442	0.14	7.81179e-59
PDSS2	5.77563e-95	1.91942	0.562	0.168	1.04885e-90
CDPF1	3.84665e-54	1.91769	0.345	0.087	6.98552e-50
TULP3	2.67404e-48	1.91631	0.313	0.079	4.85605e-44
UBE2D1	8.8937e-53	1.91393	0.354	0.096	1.6151e-48
STRBP	2.92656e-68	1.91257	0.438	0.123	5.31464e-64
MSH3	4.8138e-41	1.90911	0.318	0.098	8.74187e-37
OSMR	5.19415e-87	1.90848	0.561	0.187	9.43257e-83
PHTF2	4.60886e-60	1.90374	0.396	0.109	8.36969e-56
HS2ST1	5.71833e-185	1.90364	0.859	0.437	1.03845e-180
ATG5	6.55699e-72	1.90341	0.485	0.155	1.19075e-67
NEO1	1.1815e-33	1.90161	0.263	0.079	2.1456e-29
RSRP1	3.54475e-296	1.89936	0.952	0.541	6.43727e-292
SRSF1	1.72898e-107	1.8989	0.615	0.192	3.13983e-103
ATP5MC3	7.18872e-54	1.89782	0.419	0.147	1.30547e-49
RBMXL1	3.53056e-98	1.89403	0.575	0.174	6.4115e-94
HOXA4	3.5024e-98	1.89298	0.518	0.127	6.36035e-94
BICD2	2.58508e-77	1.88977	0.503	0.157	4.69451e-73
CDKL5	5.54208e-42	1.88747	0.33	0.104	1.00644e-37
CHCHD3	4.80094e-84	1.88637	0.541	0.174	8.71851e-80
LYRM4	1.28606e-58	1.88547	0.393	0.111	2.33549e-54
TRAK1	1.7126e-127	1.87779	0.71	0.259	3.11009e-123
PPARGC1A	9.81907e-51	1.87749	0.317	0.076	1.78314e-46
LTO1	4.28976e-61	1.87742	0.381	0.097	7.7902e-57
TNPO1	1.71841e-92	1.87663	0.566	0.178	3.12064e-88
PRDM10	6.87802e-39	1.87627	0.255	0.061	1.24905e-34
RBM47	5.75581e-142	1.87432	0.819	0.425	1.04525e-137
PLXND1	1.60828e-82	1.87408	0.508	0.147	2.92063e-78
DAAM2	7.39894e-92	1.87329	0.582	0.194	1.34365e-87
PDGFC	6.55521e-115	1.87276	0.729	0.333	1.19043e-110
ZHX1	9.31263e-107	1.87026	0.641	0.225	1.69117e-102
HERC2	5.71663e-136	1.86984	0.73	0.267	1.03814e-131
NFIB	2.51507e-100	1.86939	0.719	0.365	4.56737e-96
MDN1	4.69248e-72	1.86904	0.442	0.118	8.52155e-68
DERA	1.98074e-40	1.86622	0.305	0.09	3.59703e-36
PTPN21	1.93959e-49	1.86382	0.331	0.087	3.52229e-45
KPNA3	4.11335e-62	1.86282	0.423	0.125	7.46984e-58
EXOC4	5.65446e-225	1.86166	0.906	0.462	1.02685e-220
CARD19	1.87682e-56	1.8571	0.375	0.102	3.4083e-52
NDUFAF1	1.16736e-54	1.84854	0.406	0.13	2.11993e-50
NBAS	2.98135e-102	1.84837	0.611	0.199	5.41413e-98
CAPRIN1	3.28071e-86	1.84621	0.566	0.197	5.95777e-82
SVBP	4.39063e-51	1.84366	0.319	0.077	7.97338e-47
ADNP	1.07944e-118	1.84007	0.688	0.253	1.96026e-114
DUSP22	3.57666e-48	1.83567	0.35	0.103	6.49522e-44
FAM133B	1.76118e-47	1.83209	0.352	0.106	3.1983e-43
RBFOX2	1.17265e-109	1.82967	0.636	0.206	2.12953e-105
CPEB3	3.03305e-79	1.82822	0.535	0.179	5.50802e-75
MOB2	4.1502e-65	1.82755	0.469	0.155	7.53676e-61
NCOA2	1.4619e-117	1.82329	0.71	0.28	2.6548e-113
XRCC5	3.82648e-67	1.82326	0.454	0.138	6.94889e-63
SOCS6	8.25006e-64	1.81592	0.44	0.134	1.49821e-59
ARMH3	4.11451e-80	1.81394	0.529	0.172	7.47195e-76
DPYD	1.94218e-93	1.81345	0.641	0.265	3.52701e-89
CFH	5.40449e-31	1.80868	0.26	0.082	9.81456e-27
TRAFD1	7.94391e-40	1.80753	0.266	0.068	1.44261e-35
CMC1	1.44034e-34	1.80431	0.275	0.084	2.61567e-30
NEK1	1.05274e-50	1.79531	0.346	0.095	1.91178e-46
CNOT4	2.27765e-85	1.79438	0.547	0.174	4.1362e-81
TEX10	1.69535e-40	1.78854	0.322	0.102	3.07875e-36
RESF1	4.32351e-78	1.78742	0.528	0.174	7.85149e-74
INPP5F	2.2239e-38	1.78364	0.273	0.074	4.03861e-34
INPP4A	8.65464e-76	1.78182	0.54	0.192	1.57168e-71
PELI3	3.84951e-41	1.7775	0.302	0.086	6.99071e-37
VPS13B	5.69289e-251	1.77726	0.94	0.574	1.03383e-246
TRPC1	6.36805e-39	1.77418	0.256	0.063	1.15644e-34
PNN	3.03374e-116	1.77098	0.719	0.306	5.50927e-112
PTBP1	3.20067e-52	1.76154	0.356	0.098	5.81242e-48
NT5C3A	5.91527e-39	1.76125	0.306	0.095	1.07421e-34
TSPAN18	2.27588e-68	1.75846	0.533	0.206	4.13299e-64
WDFY3	4.02254e-144	1.75149	0.782	0.324	7.30493e-140
PLEKHA5	1.08645e-133	1.74674	0.804	0.403	1.973e-129
RNF111	1.10155e-65	1.74595	0.47	0.152	2.00041e-61
RBM26	2.76427e-118	1.73726	0.697	0.258	5.01992e-114
EXD3	3.66262e-75	1.73374	0.525	0.177	6.65131e-71
SLC25A12	3.68953e-71	1.73144	0.47	0.14	6.70018e-67
WAPL	1.47631e-85	1.73081	0.567	0.192	2.68098e-81
AUH	7.49738e-100	1.7297	0.698	0.321	1.36152e-95
EIF5	8.1592e-120	1.72539	0.743	0.335	1.48171e-115
NR2C2	3.42033e-82	1.72506	0.584	0.217	6.21132e-78
FBXO33	3.90652e-59	1.72409	0.373	0.097	7.09424e-55
FOXP1	1.24152e-77	1.72353	0.61	0.271	2.2546e-73
AFF3	4.82114e-27	1.72107	0.315	0.168	8.75518e-23
NFYC	6.61933e-88	1.72095	0.578	0.197	1.20207e-83
ERC1	1.13727e-112	1.71946	0.721	0.316	2.06528e-108
EDF1	8.57292e-68	1.71091	0.536	0.21	1.55684e-63
KDM4C	4.33478e-102	1.70937	0.657	0.253	7.87196e-98
URI1	9.36473e-168	1.70684	0.854	0.42	1.70063e-163
ZNF704	1.86477e-80	1.70298	0.576	0.216	3.38642e-76
MSANTD4	5.53941e-45	1.70095	0.359	0.117	1.00596e-40
AKAP13	1.17205e-91	1.70003	0.639	0.254	2.12845e-87
VTA1	7.38033e-36	1.69622	0.271	0.077	1.34027e-31
YTHDC1	1.44656e-130	1.69529	0.753	0.3	2.62696e-126
CHM	5.54363e-69	1.69503	0.517	0.188	1.00672e-64
NOL10	4.78739e-44	1.68941	0.358	0.118	8.69389e-40
MPP7	4.86344e-32	1.68813	0.27	0.086	8.83201e-28
PARG	1.98051e-38	1.67788	0.295	0.087	3.59661e-34
SEMA4D	6.76049e-39	1.67738	0.322	0.104	1.22771e-34
YY1	2.20842e-50	1.67708	0.363	0.107	4.01049e-46
CRY2	1.8727e-81	1.67507	0.57	0.203	3.40083e-77
USP25	2.46006e-106	1.66999	0.671	0.251	4.46747e-102
ZBTB16	3.83546e-70	1.66623	0.522	0.186	6.9652e-66
CLK4	2.25611e-97	1.66477	0.613	0.206	4.09709e-93
SYBU	3.26441e-69	1.66299	0.556	0.226	5.92816e-65
HAGHL	5.87229e-37	1.66092	0.276	0.079	1.06641e-32
ACOT8	1.6061e-32	1.66073	0.281	0.092	2.91668e-28
DMXL1	7.53118e-60	1.65852	0.465	0.162	1.36766e-55
UBE2F	3.72511e-42	1.65586	0.326	0.1	6.7648e-38
ZDBF2	7.94617e-49	1.65571	0.347	0.1	1.44302e-44
PHF21A	5.83551e-109	1.65183	0.738	0.349	1.05973e-104
AGTRAP	1.22567e-32	1.64962	0.267	0.082	2.22581e-28
ENO1	1.07433e-69	1.6485	0.556	0.222	1.95099e-65
EXOC2	9.43387e-69	1.64846	0.539	0.206	1.71319e-64
MID1IP1	1.49653e-46	1.64597	0.374	0.123	2.7177e-42
DAB2IP	1.22714e-79	1.64313	0.598	0.241	2.22848e-75
MAP2K4	8.78855e-86	1.64157	0.598	0.221	1.596e-81
YEATS2	2.74474e-37	1.64085	0.28	0.081	4.98445e-33
FHOD1	2.65733e-76	1.63992	0.552	0.198	4.82571e-72
TLK1	1.75111e-109	1.63972	0.731	0.328	3.18002e-105
BRF1	9.56494e-93	1.63703	0.592	0.197	1.73699e-88
PRKAR1B	1.92928e-32	1.63215	0.25	0.072	3.50357e-28
UXS1	2.36588e-42	1.63071	0.332	0.103	4.29644e-38
DPH6	9.73412e-82	1.63004	0.632	0.278	1.76772e-77
KIAA1217	9.89892e-25	1.62714	0.326	0.17	1.79764e-20
ATG2A	6.80471e-45	1.62599	0.358	0.115	1.23573e-40
ACSL1	1.6143e-51	1.62584	0.428	0.154	2.93156e-47
MAP3K20	4.96147e-66	1.62571	0.475	0.155	9.01003e-62
FNDC5	1.82331e-30	1.6252	0.287	0.102	3.31114e-26
LARP1B	8.72304e-32	1.62478	0.268	0.085	1.5841e-27
UHRF2	3.79938e-67	1.62446	0.528	0.199	6.89967e-63
NDUFB2	1.9225e-44	1.6244	0.4	0.151	3.49127e-40
LMF1	2.33391e-66	1.62192	0.466	0.147	4.23837e-62
EED	1.40416e-41	1.62068	0.338	0.109	2.54996e-37
MPDZ	1.62318e-58	1.62046	0.422	0.131	2.9477e-54
FMR1	2.05466e-81	1.61738	0.577	0.208	3.73126e-77
VRK2	4.80789e-46	1.61653	0.365	0.118	8.73113e-42
H2AFY	3.72201e-47	1.61316	0.381	0.127	6.75916e-43
TIAL1	2.79917e-120	1.61294	0.754	0.333	5.08329e-116
YAP1	6.62965e-77	1.61158	0.637	0.306	1.20394e-72
NSMCE2	1.11519e-54	1.60764	0.455	0.166	2.02518e-50
CDK6	2.98275e-91	1.60646	0.716	0.37	5.41668e-87
R3HDM1	1.94018e-58	1.6023	0.467	0.167	3.52338e-54
CYP11A1	1.08041e-135	1.60021	0.915	0.656	1.96202e-131
NCOR2	6.70981e-202	1.59942	0.931	0.569	1.2185e-197
BUD13	2.08429e-38	1.59694	0.317	0.102	3.78507e-34
GTF2F2	2.08375e-58	1.59263	0.477	0.176	3.7841e-54
REXO1	1.51182e-62	1.59102	0.489	0.174	2.74547e-58
EIPR1	1.3321e-38	1.58881	0.324	0.107	2.4191e-34
TWF1	4.11791e-34	1.58865	0.282	0.088	7.47812e-30
UVSSA	1.64142e-36	1.5882	0.29	0.088	2.98083e-32
XPO6	1.66259e-47	1.58803	0.38	0.125	3.01926e-43
N4BP2	5.6236e-50	1.58776	0.372	0.114	1.02125e-45
RORA	4.74791e-278	1.58758	0.988	0.913	8.62221e-274
DENND5A	2.28262e-31	1.58602	0.288	0.1	4.14524e-27
USP10	2.20466e-60	1.58323	0.488	0.179	4.00366e-56
LSS	2.24544e-53	1.58145	0.46	0.173	4.07772e-49
ARID4B	1.13593e-83	1.58086	0.633	0.264	2.06284e-79
MGAT5	1.18215e-64	1.57645	0.553	0.236	2.14679e-60
AMOT	2.21205e-38	1.57184	0.334	0.114	4.01708e-34
KARS	1.56144e-48	1.57118	0.388	0.129	2.83557e-44
AKAP8	1.98524e-62	1.57115	0.455	0.147	3.60519e-58
CPNE8	2.39469e-28	1.5677	0.271	0.096	4.34877e-24
ZNF462	2.31621e-92	1.56663	0.734	0.387	4.20625e-88
FOXJ2	5.57125e-37	1.56556	0.298	0.093	1.01174e-32
TCF20	3.89656e-67	1.56057	0.516	0.186	7.07615e-63
MYH10	3.23209e-55	1.55792	0.495	0.204	5.86948e-51
ARFIP1	9.93623e-41	1.55661	0.328	0.104	1.80442e-36
CCDC6	5.285e-59	1.55094	0.473	0.17	9.59756e-55
PPARA	2.90855e-37	1.54959	0.375	0.151	5.28192e-33
NFATC3	6.38943e-68	1.5488	0.517	0.184	1.16032e-63
SLC9A8	7.25895e-61	1.54695	0.473	0.165	1.31822e-56
PDS5B	5.51585e-50	1.53981	0.382	0.122	1.00168e-45
STRN3	5.43392e-82	1.5388	0.638	0.273	9.868e-78
CWC22	6.4054e-32	1.53564	0.302	0.109	1.16322e-27
ACSL4	1.15364e-57	1.53211	0.488	0.186	2.09501e-53
CASZ1	1.72219e-42	1.53028	0.362	0.124	3.1275e-38
HSPB8	4.69865e-34	1.52803	0.269	0.081	8.53275e-30
BBS9	4.62489e-55	1.52793	0.543	0.249	8.3988e-51
SKAP2	2.04358e-55	1.52413	0.506	0.208	3.71114e-51
LRP6	2.54742e-75	1.52327	0.599	0.248	4.62611e-71
VAV2	3.50483e-42	1.52314	0.406	0.16	6.36478e-38
ZNF593	3.4033e-35	1.5216	0.316	0.109	6.18039e-31
VAPB	2.5074e-51	1.52084	0.472	0.192	4.55344e-47
SCAPER	9.53918e-43	1.51914	0.365	0.125	1.73232e-38
PSMB7	2.85965e-45	1.51703	0.396	0.143	5.19312e-41
WDR70	1.41526e-46	1.5166	0.402	0.144	2.57011e-42
MICU1	3.99142e-71	1.51432	0.597	0.258	7.24842e-67
SPPL3	7.733e-43	1.5135	0.385	0.141	1.40431e-38
AMD1	3.00253e-39	1.51095	0.309	0.096	5.4526e-35
SH3BP4	1.94004e-44	1.50958	0.398	0.146	3.52312e-40
TTC27	3.21011e-38	1.50855	0.364	0.138	5.82956e-34
MYO5A	1.32783e-36	1.50675	0.319	0.108	2.41134e-32
IDE	2.23081e-55	1.50437	0.5	0.204	4.05116e-51
MAP2K5	3.40865e-47	1.50173	0.384	0.129	6.19011e-43
MAP4K3	4.42024e-72	1.49529	0.579	0.235	8.02715e-68
FLNB	4.03579e-48	1.49526	0.389	0.13	7.329e-44
ZCCHC7	2.63871e-34	1.49485	0.366	0.154	4.79191e-30
SORBS2	5.10439e-127	1.49463	0.932	0.749	9.26957e-123
PKD1	6.50633e-35	1.49323	0.327	0.118	1.18155e-30
UBE2K	2.42992e-52	1.49188	0.422	0.145	4.41274e-48
PIAS1	1.48357e-55	1.48908	0.465	0.171	2.69416e-51
ATP11A	3.7491e-33	1.48908	0.369	0.158	6.80836e-29
NCK1	1.94367e-48	1.48864	0.45	0.177	3.52971e-44
SYNE2	3.84628e-126	1.48554	0.85	0.475	6.98485e-122
STAG1	2.57239e-70	1.48482	0.635	0.305	4.67145e-66
GLCCI1	1.18689e-27	1.47885	0.261	0.091	2.15539e-23
SESTD1	2.91871e-31	1.47643	0.291	0.102	5.30038e-27
STX7	3.26971e-53	1.47427	0.476	0.187	5.93779e-49
NCOA6	7.16672e-63	1.47295	0.518	0.198	1.30148e-58
LAPTM4B	6.05619e-52	1.47159	0.599	0.354	1.0998e-47
PI4KA	8.25061e-61	1.47069	0.506	0.192	1.49831e-56
SMCHD1	7.40881e-60	1.46947	0.503	0.192	1.34544e-55
MRTFB	3.84848e-48	1.46926	0.456	0.183	6.98885e-44
EIF2B3	9.66094e-55	1.46782	0.463	0.171	1.75443e-50
EEA1	1.48194e-61	1.46721	0.528	0.213	2.69121e-57
ATP6V0C	2.10713e-27	1.4663	0.279	0.104	3.82654e-23
NEDD4L	7.72141e-73	1.46293	0.651	0.36	1.40221e-68
PREP	4.32377e-34	1.46281	0.322	0.117	7.85196e-30
ME3	1.72981e-52	1.46156	0.538	0.249	3.14133e-48
DNAJC1	1.69567e-43	1.46129	0.415	0.162	3.07934e-39
ITSN1	6.70544e-62	1.45956	0.508	0.19	1.21771e-57
GPATCH4	2.65585e-31	1.45894	0.271	0.088	4.82303e-27
DNAJA1	2.94587e-66	1.45752	0.611	0.283	5.3497e-62
NECTIN3	2.73145e-32	1.45313	0.372	0.166	4.96032e-28
APOOL	7.44488e-43	1.44825	0.349	0.115	1.35199e-38
PIBF1	2.52937e-27	1.44613	0.271	0.098	4.59333e-23
GPX3	7.98506e-34	1.4439	0.32	0.115	1.45009e-29
IQSEC1	2.30676e-94	1.44367	0.801	0.464	4.18908e-90
TOP2B	2.59544e-59	1.4436	0.523	0.213	4.71332e-55
ACBD4	5.19922e-40	1.44276	0.367	0.134	9.44178e-36
ACAT2	1.35089e-30	1.43557	0.292	0.104	2.45322e-26
TBC1D4	2.60004e-102	1.435	0.927	0.849	4.72166e-98
TOP1	7.63174e-46	1.43198	0.451	0.187	1.38592e-41
BBX	2.78954e-73	1.42875	0.683	0.36	5.0658e-69
KIAA0586	5.55274e-30	1.42668	0.276	0.096	1.00838e-25
USP6NL	1.08707e-77	1.42511	0.62	0.257	1.97411e-73
STAU2	9.58152e-146	1.42493	0.884	0.516	1.74e-141
MTRF1L	4.21875e-41	1.42471	0.352	0.12	7.66126e-37
ZCCHC8	1.77338e-39	1.42127	0.281	0.081	3.22046e-35
C1orf35	2.26206e-27	1.42013	0.258	0.09	4.1079e-23
COX10	1.80722e-27	1.41961	0.305	0.124	3.28191e-23
BCL11A	1.00823e-47	1.4118	0.54	0.273	1.83094e-43
FRYL	3.85929e-58	1.41104	0.518	0.209	7.00847e-54
GAREM1	1.25476e-28	1.41089	0.317	0.129	2.27865e-24
HDAC2	2.68509e-45	1.40757	0.422	0.162	4.87612e-41
FHL3	9.18165e-43	1.40703	0.389	0.144	1.66739e-38
ZNF236	7.14675e-49	1.40684	0.432	0.161	1.29785e-44
PRKG1	1.81979e-104	1.40307	0.852	0.568	3.30473e-100
SPATA7	1.57614e-24	1.40045	0.265	0.102	2.86227e-20
RNF38	3.28381e-45	1.39209	0.496	0.233	5.96339e-41
NADK	2.66114e-61	1.39145	0.606	0.296	4.83264e-57
STAG2	9.68292e-86	1.38362	0.704	0.34	1.75842e-81
TSC22D4	7.47975e-55	1.37849	0.583	0.291	1.35832e-50
GBF1	1.85717e-62	1.3769	0.56	0.238	3.37262e-58
KMT2C	1.17239e-129	1.37656	0.862	0.511	2.12906e-125
ME1	1.02215e-72	1.37357	0.695	0.367	1.85623e-68
SMG6	1.18126e-39	1.37257	0.334	0.113	2.14517e-35
ATXN3	4.67515e-30	1.36774	0.316	0.123	8.49007e-26
U2SURP	2.11187e-105	1.36756	0.772	0.372	3.83515e-101
FTO	9.24903e-33	1.36717	0.431	0.221	1.67962e-28
TLK2	7.41381e-41	1.36688	0.385	0.145	1.34635e-36
MKLN1	4.35745e-94	1.36175	0.731	0.346	7.91312e-90
MAST2	2.57549e-29	1.36132	0.314	0.124	4.6771e-25
HNRNPR	2.38274e-45	1.36017	0.433	0.171	4.32706e-41
DCLK2	3.83312e-42	1.35684	0.418	0.167	6.96095e-38
TTC7B	2.37188e-30	1.35538	0.313	0.12	4.30734e-26
ZNF143	4.05277e-35	1.35066	0.282	0.09	7.35982e-31
ABI2	2.65468e-71	1.34925	0.662	0.329	4.8209e-67
MC2R	4.13619e-41	1.34205	0.459	0.208	7.51133e-37
ULK2	7.70054e-47	1.3405	0.42	0.157	1.39842e-42
GIGYF2	3.26284e-57	1.33708	0.511	0.205	5.92532e-53
CEP250	1.98069e-38	1.32914	0.316	0.104	3.59694e-34
COQ10B	1.37789e-31	1.32138	0.364	0.156	2.50224e-27
UBR3	1.3181e-65	1.3171	0.627	0.3	2.39366e-61
THRAP3	6.78482e-87	1.31701	0.73	0.367	1.23212e-82
LCORL	2.355e-24	1.31564	0.264	0.102	4.27669e-20
NT5C2	1.73909e-44	1.31184	0.482	0.216	3.15819e-40
RAB6A	2.07776e-62	1.31117	0.57	0.244	3.77321e-58
KIF13B	1.23229e-61	1.30917	0.628	0.311	2.23783e-57
MTUS1	1.81685e-68	1.30857	0.696	0.391	3.2994e-64
HACD3	1.47772e-53	1.30712	0.505	0.209	2.68353e-49
SIPA1L1	4.77945e-30	1.30615	0.367	0.163	8.67948e-26
AVEN	2.02233e-37	1.30211	0.441	0.203	3.67255e-33
BMPR1A	6.93028e-56	1.30193	0.548	0.242	1.25854e-51
ATP5MC1	4.53761e-22	1.30091	0.31	0.149	8.24031e-18
IQGAP2	2.69187e-64	1.29912	0.725	0.455	4.88844e-60
MTHFD1L	4.38665e-24	1.2962	0.273	0.109	7.96615e-20
FASN	2.71971e-54	1.29524	0.538	0.236	4.939e-50
SRBD1	5.21957e-26	1.2918	0.286	0.113	9.47874e-22
CYP51A1	1.3959e-71	1.2898	0.673	0.337	2.53496e-67
ANKRD11	1.6389e-86	1.28938	0.765	0.413	2.97625e-82
PCBP4	1.90094e-25	1.28698	0.277	0.108	3.4521e-21
PPIP5K2	7.57355e-41	1.28039	0.442	0.19	1.37536e-36
FOXK2	9.63897e-50	1.27589	0.546	0.26	1.75044e-45
DNAJC14	7.25528e-27	1.27515	0.261	0.095	1.31756e-22
DDX46	7.73163e-56	1.27503	0.617	0.319	1.40406e-51
ANKRD12	5.51839e-17	1.2713	0.255	0.12	1.00214e-12
SLC44A1	3.2764e-45	1.26823	0.496	0.225	5.94994e-41
FNBP1L	1.17316e-35	1.26808	0.329	0.119	2.13046e-31
BIRC6	4.80435e-78	1.26683	0.7	0.35	8.72469e-74
FCHSD2	4.84361e-41	1.26618	0.492	0.24	8.796e-37
CDK13	1.77034e-68	1.26154	0.67	0.337	3.21494e-64
KMT2E	1.10203e-91	1.2587	0.781	0.424	2.00128e-87
RAB12	1.30697e-51	1.25837	0.519	0.227	2.37347e-47
FAM204A	2.84563e-26	1.25777	0.291	0.117	5.16766e-22
REPS2	2.12936e-51	1.25723	0.638	0.361	3.86693e-47
CHFR	3.33657e-32	1.25605	0.331	0.129	6.05921e-28
ZDHHC14	9.43439e-25	1.25156	0.314	0.138	1.71328e-20
UBR5	2.38974e-68	1.25156	0.605	0.262	4.33977e-64
ZFP64	2.68453e-42	1.25112	0.329	0.108	4.8751e-38
ZC3H3	4.15522e-45	1.25098	0.478	0.209	7.54588e-41
NAMPT	1.80939e-31	1.24674	0.314	0.119	3.28585e-27
EIF2AK4	1.14333e-23	1.24422	0.275	0.112	2.07628e-19
SPAG16	4.13044e-27	1.24122	0.393	0.2	7.50088e-23
RABGAP1	1.80642e-59	1.23732	0.542	0.226	3.28046e-55
VPS50	1.19808e-25	1.23503	0.286	0.114	2.17572e-21
ACAD9	9.38709e-64	1.23399	0.563	0.233	1.7047e-59
SSU72	4.63803e-30	1.2334	0.367	0.162	8.42266e-26
MALT1	2.12517e-23	1.2316	0.265	0.107	3.8593e-19
RNF149	1.64238e-36	1.22731	0.458	0.22	2.98257e-32
ILF2	3.83712e-42	1.22376	0.453	0.195	6.96822e-38
CNOT6	2.60325e-27	1.22209	0.298	0.119	4.72749e-23
MPLKIP	1.0028e-29	1.21871	0.33	0.135	1.82108e-25
WNK1	1.33035e-65	1.21701	0.691	0.382	2.41591e-61
MOCOS	1.27708e-25	1.21607	0.39	0.214	2.31918e-21
MARK3	1.96856e-66	1.2125	0.625	0.286	3.57491e-62
GRIN2C	1.03052e-36	1.2123	0.342	0.127	1.87142e-32
PIGK	1.10041e-18	1.20844	0.259	0.117	1.99834e-14
HOOK1	2.05013e-31	1.20752	0.333	0.133	3.72304e-27
SNX2	8.31289e-30	1.20698	0.354	0.152	1.50962e-25
CLASP1	1.636e-42	1.20615	0.528	0.264	2.97098e-38
PCNT	8.59057e-36	1.20602	0.41	0.179	1.56005e-31
USP53	2.02441e-39	1.20482	0.408	0.167	3.67633e-35
KIAA1549	9.88701e-52	1.20274	0.586	0.291	1.79548e-47
RSRC2	9.95808e-58	1.20093	0.618	0.305	1.80839e-53
TCERG1	7.68002e-68	1.1996	0.682	0.35	1.39469e-63
BICRAL	2.4399e-35	1.19908	0.384	0.16	4.43085e-31
EXOC1	3.5941e-22	1.19772	0.281	0.122	6.52689e-18
CUL2	2.28374e-29	1.19505	0.322	0.13	4.14726e-25
NDE1	1.02308e-18	1.19425	0.25	0.109	1.85792e-14
SMAD3	5.25834e-51	1.19416	0.593	0.3	9.54915e-47
LRRFIP1	1.36587e-39	1.1904	0.464	0.213	2.48043e-35
RC3H1	1.01744e-57	1.18779	0.575	0.26	1.84768e-53
PTBP2	1.26268e-44	1.18762	0.471	0.204	2.29302e-40
RNF13	2.36394e-50	1.18714	0.52	0.23	4.29292e-46
DIDO1	6.43165e-73	1.18334	0.665	0.313	1.16799e-68
AKT3	2.63851e-68	1.18261	0.74	0.431	4.79153e-64
PCGF3	3.10949e-61	1.17795	0.677	0.369	5.64683e-57
RNPC3	6.33521e-52	1.16879	0.538	0.242	1.15048e-47
ABCD3	2.04774e-34	1.16675	0.368	0.151	3.71869e-30
ERBIN	2.35637e-45	1.16352	0.597	0.328	4.27916e-41
NDUFS5	2.34463e-21	1.16247	0.342	0.173	4.25784e-17
ABAT	4.61578e-30	1.16091	0.31	0.12	8.38226e-26
HERC1	6.57755e-33	1.15963	0.381	0.165	1.19448e-28
CDC5L	3.4087e-44	1.15822	0.507	0.236	6.19021e-40
PPID	1.61338e-31	1.15762	0.341	0.139	2.9299e-27
SMAD5	3.85525e-45	1.15666	0.592	0.318	7.00113e-41
CHUK	3.38031e-22	1.15629	0.264	0.109	6.13865e-18
INTS6L	4.40948e-33	1.15623	0.438	0.211	8.00761e-29
MYRIP	1.09241e-13	1.15398	0.259	0.139	1.98382e-09
GPATCH2	3.95603e-35	1.15284	0.447	0.213	7.18415e-31
EIF2AK3	5.76251e-21	1.15226	0.262	0.112	1.04647e-16
ERCC6	1.28453e-24	1.14894	0.324	0.146	2.33271e-20
WDSUB1	9.33627e-29	1.14562	0.308	0.123	1.69547e-24
SPTLC1	3.96443e-26	1.14428	0.337	0.151	7.1994e-22
RICTOR	2.62735e-34	1.14317	0.422	0.193	4.77127e-30
SUCLG2	4.24335e-21	1.1426	0.318	0.155	7.70593e-17
ABHD18	2.20635e-24	1.14188	0.295	0.125	4.00674e-20
VPS8	6.91167e-29	1.14182	0.358	0.158	1.25516e-24
BORCS5	4.2618e-25	1.14151	0.291	0.122	7.73942e-21
BRD1	3.62024e-62	1.13395	0.707	0.397	6.57435e-58
LIFR	6.35138e-46	1.13219	0.529	0.252	1.15341e-41
ARHGAP17	2.46501e-41	1.1317	0.47	0.213	4.47646e-37
KLHDC1	5.10488e-26	1.12904	0.274	0.107	9.27046e-22
TDRP	2.83771e-49	1.12837	0.55	0.26	5.15328e-45
TMEM189	4.64449e-22	1.12675	0.273	0.117	8.43439e-18
RBM12B	1.50508e-25	1.12555	0.317	0.138	2.73323e-21
ERLIN2	3.44157e-24	1.12458	0.266	0.106	6.2499e-20
CDC14B	1.82567e-25	1.11949	0.292	0.12	3.31541e-21
PRPSAP2	1.06007e-21	1.11936	0.271	0.117	1.92509e-17
PAIP1	1.45753e-28	1.11577	0.392	0.187	2.64687e-24
PTK2	5.02183e-62	1.11473	0.717	0.419	9.11964e-58
TNKS	7.37791e-48	1.11398	0.551	0.265	1.33983e-43
SF3B1	7.81637e-51	1.11065	0.55	0.256	1.41945e-46
SETD3	1.94219e-33	1.10911	0.451	0.224	3.52702e-29
CAMSAP2	7.76867e-59	1.10852	0.674	0.365	1.41079e-54
RBBP6	4.16267e-56	1.10578	0.629	0.321	7.55942e-52
IVNS1ABP	2.5356e-48	1.10427	0.626	0.351	4.60465e-44
ANKRD46	6.67881e-21	1.10195	0.28	0.125	1.21287e-16
KIAA2026	8.22837e-62	1.10153	0.681	0.362	1.49427e-57
OSBPL8	3.621e-26	1.09997	0.378	0.184	6.57574e-22
PKDCC	2.51266e-18	1.09728	0.301	0.151	4.563e-14
SEPTIN11	1.10501e-27	1.09509	0.396	0.194	2.00669e-23
ALG14	7.22324e-29	1.09479	0.373	0.171	1.31174e-24
RBM3	1.09498e-44	1.09353	0.54	0.265	1.98849e-40
ANKRD10	2.33894e-59	1.09229	0.669	0.356	4.24752e-55
NUCB2	4.60433e-36	1.08655	0.452	0.213	8.36147e-32
PPIB	4.50525e-35	1.08321	0.464	0.226	8.18153e-31
PHF3	2.31474e-75	1.08183	0.793	0.483	4.20357e-71
ARHGAP10	9.99388e-19	1.08134	0.29	0.14	1.81489e-14
LAMTOR2	2.81704e-18	1.07995	0.269	0.125	5.11574e-14
HSPA4	6.03614e-26	1.07814	0.331	0.147	1.09616e-21
MVB12B	3.19254e-32	1.07759	0.359	0.152	5.79765e-28
TRIO	3.17186e-68	1.0749	0.797	0.528	5.7601e-64
MTMR1	4.79266e-27	1.07419	0.336	0.147	8.70347e-23
NSD1	8.38649e-40	1.07271	0.509	0.252	1.52299e-35
GLO1	4.76705e-16	1.07122	0.25	0.119	8.65697e-12
HNRNPDL	1.81831e-66	1.06835	0.751	0.442	3.30205e-62
LSM14A	1.17302e-31	1.06448	0.411	0.193	2.1302e-27
TRMT1L	2.72946e-18	1.06267	0.264	0.122	4.9567e-14
HTT	1.83924e-41	1.05997	0.505	0.242	3.34005e-37
TMEM161B	8.0648e-20	1.0555	0.279	0.128	1.46457e-15
FAR1	5.21896e-37	1.05356	0.462	0.219	9.47763e-33
PDE5A	1.26484e-33	1.05182	0.448	0.217	2.29694e-29
CACNA2D1	4.77269e-25	1.04884	0.558	0.403	8.66721e-21
ATAD2B	3.00501e-46	1.04874	0.537	0.257	5.45709e-42
BTBD9	1.69962e-52	1.04708	0.655	0.36	3.08651e-48
PDZRN3	2.80648e-35	1.0454	0.678	0.511	5.09656e-31
PRRC2C	7.83086e-50	1.0402	0.59	0.296	1.42208e-45
HERC3	1.51249e-32	1.03958	0.419	0.197	2.74668e-28
TRA2B	2.73494e-39	1.03792	0.493	0.238	4.96665e-35
CREBBP	5.38326e-41	1.03768	0.568	0.305	9.776e-37
RPN1	2.07455e-29	1.03666	0.383	0.177	3.76738e-25
CWC27	5.14875e-27	1.03446	0.407	0.205	9.35013e-23
OGT	1.75022e-155	1.0343	0.967	0.724	3.17839e-151
LRRFIP2	4.80953e-27	1.03192	0.373	0.177	8.73411e-23
PCCB	2.66959e-33	1.03178	0.497	0.263	4.84798e-29
LRBA	1.35028e-47	1.02632	0.645	0.365	2.45211e-43
GRB2	1.9678e-36	1.02494	0.466	0.224	3.57353e-32
FXR1	4.42534e-40	1.02419	0.513	0.254	8.03642e-36
ABCE1	1.30693e-20	1.02331	0.27	0.119	2.37339e-16
RSBN1L	1.73225e-28	1.02229	0.402	0.195	3.14577e-24
LRRN3	1.42802e-17	1.01735	0.45	0.292	2.59328e-13
FGFR2	9.0055e-40	1.01411	0.556	0.295	1.6354e-35
SLC30A7	4.80966e-27	1.00785	0.351	0.161	8.73435e-23
TMEM108	1.05016e-13	1.00761	0.37	0.264	1.90709e-09
BAZ1B	4.78134e-46	1.00642	0.646	0.375	8.68292e-42
PRDM2	1.33393e-42	1.00562	0.569	0.3	2.42241e-38
PPM1B	8.51137e-31	1.00217	0.437	0.217	1.54566e-26
COX6C	8.70292e-20	1.00191	0.338	0.174	1.58045e-15
USP15	1.38798e-43	1.00123	0.509	0.241	2.52058e-39

## Sheet: Capsular_cell
gene	p_val	avg_log2FC	pct.1	pct.2	p_val_adj
GIF	4.3951e-116	12.1402	0.894	0	7.9815e-112
PAX2	2.97222e-110	11.8723	0.865	0	5.39756e-106
DACH2	4.68192e-91	10.3969	0.759	0	8.50237e-87
FGFR3	1.24904e-94	10.2296	0.78	0	2.26825e-90
FRMPD4	1.40041e-69	10.0806	0.617	0	2.54315e-65
MALRD1	6.0389e-61	10.0676	0.553	0	1.09666e-56
KCNIP4	6.0389e-61	10.015	0.553	0	1.09666e-56
SPINK2	4.68192e-91	9.98675	0.759	0	8.50237e-87
EEF1A1	3.101e-92	9.67623	0.766	0	5.63142e-88
TPT1	7.58113e-96	9.66597	0.787	0	1.37673e-91
CTBP1	9.84223e-89	9.60466	0.745	0	1.78735e-84
SHISA9	1.29372e-67	9.57308	0.603	0	2.3494e-63
RBFOX1	3.48458e-50	9.44283	0.468	0	6.32799e-46
SGCZ	2.48579e-39	9.31474	0.376	0	4.51419e-35
HNRNPH1	2.47896e-85	9.28132	0.723	0	4.50178e-81
GPM6B	8.08037e-63	9.26853	0.567	0	1.4674e-58
FGB	9.19553e-47	9.23599	0.44	0	1.66991e-42
UNC13C	2.85973e-57	9.16202	0.525	0	5.19327e-53
MATR3	6.12446e-81	9.06776	0.695	0	1.1122e-76
C12ORF75	5.11213e-60	8.99798	0.546	0	9.28362e-56
TXN	4.26884e-59	8.97984	0.539	0	7.7522e-55
KRT18	1.12162e-65	8.95524	0.589	0	2.03686e-61
CUX2	1.21401e-66	8.93929	0.596	0	2.20464e-62
GAPDH	1.40041e-69	8.92401	0.617	0	2.54315e-65
LRP2	1.81884e-55	8.90102	0.511	0	3.30301e-51
PPP4R4	1.00989e-77	8.90043	0.695	0.002	1.83396e-73
CNTNAP2	3.15672e-74	8.88941	0.681	0.004	5.73261e-70
CES5A	7.03511e-62	8.83909	0.56	0	1.27758e-57
TRPM6	6.0389e-61	8.83744	0.553	0	1.09666e-56
SREK1	1.41892e-71	8.82214	0.631	0	2.57676e-67
GNAS	1.42158e-70	8.80857	0.624	0	2.58159e-66
CLDN10	1.36762e-42	8.78776	0.404	0	2.4836e-38
H3F3C	1.02056e-64	8.78007	0.582	0	1.85333e-60
SOX6	2.12291e-118	8.7105	0.929	0.013	3.8552e-114
HIVEP1	4.26884e-59	8.63208	0.539	0	7.7522e-55
MRPL57	6.0389e-61	8.61654	0.553	0	1.09666e-56
USH1C	3.51709e-58	8.61043	0.532	0	6.38704e-54
SLCO1B1	1.81884e-55	8.60713	0.511	0	3.30301e-51
IFITM5	6.33904e-52	8.5156	0.482	0	1.15117e-47
NKAIN2	3.60995e-26	8.4779	0.255	0	6.55567e-22
BRE	8.40112e-53	8.46453	0.489	0	1.52564e-48
PTMA	4.26884e-59	8.43664	0.539	0	7.7522e-55
PABPC1	3.51709e-58	8.43486	0.532	0	6.38704e-54
HMGB1	9.148e-64	8.41798	0.574	0	1.66128e-59
EEF1D	1.81884e-55	8.39954	0.511	0	3.30301e-51
PCDH11X	5.2631e-33	8.35593	0.319	0	9.55779e-29
IL1RAPL1	6.22689e-30	8.3533	0.291	0	1.1308e-25
SLC26A3	2.5395e-49	8.35327	0.461	0	4.61172e-45
HPSE2	2.5395e-49	8.34689	0.461	0	4.61172e-45
TMEM269	6.41366e-46	8.34367	0.433	0	1.16472e-41
SNTG1	3.5785e-29	8.30226	0.284	0	6.49855e-25
TPM3	2.85973e-57	8.28619	0.525	0	5.19327e-53
USP9Y	8.08037e-63	8.26444	0.567	0	1.4674e-58
EYA4	5.04289e-92	8.22251	0.801	0.006	9.15789e-88
IL1RAPL2	2.44222e-63	8.21466	0.596	0.002	4.43507e-59
GPX1	1.10017e-53	8.21239	0.496	0	1.99791e-49
ZC3H11A	8.40112e-53	8.14122	0.489	0	1.52564e-48
NAP1L1	2.5395e-49	8.12671	0.461	0	4.61172e-45
NPAS3	1.58153e-126	8.10254	0.957	0.028	2.87206e-122
HSD3B1	1.00092e-37	8.09517	0.362	0	1.81767e-33
SIK1	9.19553e-47	8.09418	0.44	0	1.66991e-42
FAR2	3.00558e-71	8.0895	0.66	0.004	5.45813e-67
DCDC2	7.35465e-74	8.08148	0.681	0.004	1.3356e-69
CCER1	6.33904e-52	8.06276	0.482	0	1.15117e-47
SRSF6	1.10017e-53	8.06113	0.496	0	1.99791e-49
TJP2	6.41366e-46	8.02369	0.433	0	1.16472e-41
UNC79	2.04366e-43	8.00584	0.411	0	3.71128e-39
CCSER1	3.43854e-88	7.9996	0.773	0.004	6.24439e-84
PKHD1	1.15423e-27	7.97466	0.27	0	2.09609e-23
HNRNPA1	3.8626e-40	7.93301	0.383	0	7.01447e-36
TBX1	1.74391e-48	7.93163	0.475	0.002	3.16693e-44
B3GALT1	2.38804e-35	7.91987	0.34	0	4.33669e-31
CAPSL	3.02312e-44	7.91911	0.418	0	5.48999e-40
ATP5I	1.30433e-47	7.90123	0.447	0	2.36867e-43
ATP5L	6.26413e-37	7.89501	0.355	0	1.13757e-32
CDH6	1.28509e-66	7.88228	0.631	0.004	2.33372e-62
PLPP4	3.5785e-29	7.87607	0.284	0	6.49855e-25
KCNJ15	3.885e-36	7.87313	0.348	0	7.05516e-32
PUDP	1.36762e-42	7.86098	0.404	0	2.4836e-38
SOX9	7.4183e-45	7.85256	0.447	0.002	1.34716e-40
GPC2	2.75921e-88	7.80134	0.78	0.006	5.01073e-84
XKR4	5.24337e-42	7.77491	0.426	0.002	9.52196e-38
HMGN2P46	2.04366e-43	7.7685	0.411	0	3.71128e-39
WTAP	3.48458e-50	7.74578	0.468	0	6.32799e-46
ELF3	3.885e-36	7.74161	0.348	0	7.05516e-32
FAM21C	1.83007e-48	7.71032	0.454	0	3.32342e-44
WASHC2C	1.83007e-48	7.71032	0.454	0	3.32342e-44
GOLGA4	9.06127e-42	7.6945	0.397	0	1.64553e-37
CYRIB	9.19553e-47	7.67709	0.44	0	1.66991e-42
OLFM3	3.885e-36	7.66314	0.348	0	7.05516e-32
CTNND2	3.18704e-47	7.66039	0.468	0.002	5.78767e-43
ATPIF1	3.02312e-44	7.65403	0.418	0	5.48999e-40
FAM46A	8.78854e-34	7.65336	0.326	0	1.596e-29
ATP5B	9.06127e-42	7.63362	0.397	0	1.64553e-37
FANCD2	1.83007e-48	7.63131	0.454	0	3.32342e-44
CYRIA	3.885e-36	7.61798	0.348	0	7.05516e-32
NDST3	5.2631e-33	7.6037	0.319	0	9.55779e-29
NPM1	9.06127e-42	7.58728	0.397	0	1.64553e-37
HHLA2	2.48579e-39	7.58663	0.376	0	4.51419e-35
TUBA1B	3.12529e-32	7.56845	0.312	0	5.67553e-28
HNRNPAB	9.06127e-42	7.56105	0.397	0	1.64553e-37
ZBTB32	9.06127e-42	7.54763	0.397	0	1.64553e-37
PRMT8	6.26413e-37	7.52729	0.355	0	1.13757e-32
UBR1	1.58472e-38	7.50512	0.369	0	2.87785e-34
UNKL	3.885e-36	7.45412	0.348	0	7.05516e-32
SLC5A11	6.47959e-27	7.44295	0.262	0	1.17669e-22
PTRF	2.38804e-35	7.4425	0.34	0	4.33669e-31
PDE3A	1.22904e-100	7.43554	0.879	0.038	2.23193e-96
FKBP4	3.885e-36	7.42927	0.348	0	7.05516e-32
ESRRG	4.42714e-98	7.40743	0.858	0.028	8.03969e-94
IQGAP3	8.78854e-34	7.40612	0.326	0	1.596e-29
DAB1	1.84041e-31	7.40017	0.305	0	3.34218e-27
MINOS1	2.38804e-35	7.39953	0.34	0	4.33669e-31
GLS2	1.98879e-61	7.38945	0.582	0.002	3.61165e-57
GRIP1	8.34181e-36	7.38188	0.369	0.002	1.51487e-31
MKRN4P	6.26413e-37	7.3775	0.355	0	1.13757e-32
CCDC73	1.22972e-58	7.36855	0.56	0.002	2.23317e-54
ZFR2	2.38804e-35	7.36143	0.34	0	4.33669e-31
GNAL	1.91944e-101	7.33672	0.872	0.013	3.4857e-97
SLC6A2	3.60995e-26	7.32973	0.255	0	6.55567e-22
UGT8	1.84041e-31	7.3235	0.305	0	3.34218e-27
ROBO2	4.3852e-47	7.29243	0.468	0.002	7.96352e-43
GJB6	3.5785e-29	7.27322	0.284	0	6.49855e-25
FMR1NB	6.26413e-37	7.25969	0.355	0	1.13757e-32
H2AZ2	8.78854e-34	7.25924	0.326	0	1.596e-29
HPX	5.11098e-57	7.24806	0.56	0.004	9.28154e-53
SLC25A21	3.50923e-41	7.24182	0.418	0.002	6.37276e-37
CD59	3.885e-36	7.2343	0.348	0	7.05516e-32
PROM1	3.12529e-32	7.22614	0.312	0	5.67553e-28
SLC9A2	6.47959e-27	7.22583	0.262	0	1.17669e-22
MRPS28	3.5785e-29	7.22362	0.284	0	6.49855e-25
UNC-11	1.00092e-37	7.20423	0.362	0	1.81767e-33
ZCCHC6	3.5785e-29	7.20287	0.284	0	6.49855e-25
DGKB	2.67584e-42	7.19701	0.44	0.004	4.85933e-38
NAB-1	6.22689e-30	7.18398	0.291	0	1.1308e-25
CDIN1	1.15423e-27	7.18016	0.27	0	2.09609e-23
MLANA	1.15423e-27	7.16712	0.27	0	2.09609e-23
CDH1	1.07487e-30	7.13977	0.298	0	1.95197e-26
GLUD2	3.60995e-26	7.11939	0.255	0	6.55567e-22
FKBP1A	6.47959e-27	7.10469	0.262	0	1.17669e-22
TBCA	3.5785e-29	7.09489	0.284	0	6.49855e-25
YLPM1	1.45501e-34	7.07481	0.333	0	2.64231e-30
GATSL2	3.5785e-29	7.07321	0.284	0	6.49855e-25
PDXDC1	5.2631e-33	7.07201	0.319	0	9.55779e-29
OLA1	6.22689e-30	7.06734	0.291	0	1.1308e-25
KCNE2	1.15423e-27	7.06531	0.27	0	2.09609e-23
ORAOV1	6.22689e-30	7.06439	0.291	0	1.1308e-25
SRP14	3.5785e-29	7.04804	0.284	0	6.49855e-25
HNF1B	6.47959e-27	7.04795	0.262	0	1.17669e-22
GARRE1	6.47959e-27	7.04703	0.262	0	1.17669e-22
PALS1	2.04029e-28	7.04511	0.277	0	3.70517e-24
C11orf16	6.22689e-30	7.04366	0.291	0	1.1308e-25
DENND2B	3.12529e-32	7.0425	0.312	0	5.67553e-28
SLC25A3	1.07487e-30	7.02585	0.298	0	1.95197e-26
ARNTL2	1.07487e-30	7.01801	0.298	0	1.95197e-26
BMAL2	1.07487e-30	7.01801	0.298	0	1.95197e-26
MACROH2A1	3.12529e-32	7.00585	0.312	0	5.67553e-28
PAPOLB	1.42191e-60	6.9919	0.574	0.002	2.58219e-56
ATP5H	6.22689e-30	6.97753	0.291	0	1.1308e-25
C14ORF2	3.5785e-29	6.97382	0.284	0	6.49855e-25
C14orf2	3.5785e-29	6.97382	0.284	0	6.49855e-25
ATP5G3	6.22689e-30	6.95581	0.291	0	1.1308e-25
ATP5G2	3.60995e-26	6.94353	0.255	0	6.55567e-22
MRPS25	1.15423e-27	6.92931	0.27	0	2.09609e-23
WHSC1L1	1.84041e-31	6.92799	0.305	0	3.34218e-27
KLHDC7A	3.60995e-26	6.91915	0.255	0	6.55567e-22
KARS1	3.5785e-29	6.91754	0.284	0	6.49855e-25
SHROOM2	5.54134e-48	6.91405	0.504	0.008	1.00631e-43
PPFIA1	6.47959e-27	6.88614	0.262	0	1.17669e-22
RTFDC1	6.22689e-30	6.87739	0.291	0	1.1308e-25
AHSA2	6.47959e-27	6.8639	0.262	0	1.17669e-22
APOA1	1.38501e-43	6.84243	0.461	0.006	2.51518e-39
MGEA5	5.2631e-33	6.83632	0.319	0	9.55779e-29
MESDC2	6.47959e-27	6.83448	0.262	0	1.17669e-22
CDC42	6.22689e-30	6.82817	0.291	0	1.1308e-25
NUDT4	3.5785e-29	6.81681	0.284	0	6.49855e-25
GOLM2	2.04029e-28	6.78621	0.277	0	3.70517e-24
PRELID1	1.15423e-27	6.77635	0.27	0	2.09609e-23
CCDC88C	2.26637e-52	6.76792	0.532	0.006	4.11572e-48
ESRP2	1.84129e-51	6.70741	0.504	0.002	3.34379e-47
ATP5J2	1.15423e-27	6.69675	0.27	0	2.09609e-23
MND1	3.60587e-30	6.69126	0.319	0.002	6.54826e-26
VAV3	1.12924e-54	6.68452	0.553	0.006	2.0507e-50
TPK1	3.53631e-75	6.66	0.73	0.017	6.42193e-71
MRPL33	1.15423e-27	6.64993	0.27	0	2.09609e-23
ZNF385D	1.2742e-88	6.61947	0.837	0.03	2.31394e-84
STAG3	6.47959e-27	6.61907	0.262	0	1.17669e-22
MAGI2	2.33289e-102	6.60464	0.908	0.032	4.23652e-98
GNB1L	9.18308e-80	6.58757	0.773	0.021	1.66765e-75
EPRS1	3.60995e-26	6.5819	0.255	0	6.55567e-22
HSF3	6.47959e-27	6.53363	0.262	0	1.17669e-22
COBL	8.56466e-53	6.53278	0.546	0.008	1.55534e-48
NEBL	9.98018e-64	6.5316	0.645	0.013	1.8124e-59
GRIK2	1.67129e-40	6.50841	0.426	0.004	3.03505e-36
SEMA4G	2.19202e-37	6.48629	0.397	0.004	3.98071e-33
THSD7A	1.89601e-56	6.47578	0.596	0.015	3.44315e-52
NHS	8.44705e-109	6.47334	0.943	0.064	1.53398e-104
MAP7	1.70648e-68	6.39939	0.695	0.021	3.09897e-64
MSH4	2.0329e-53	6.39386	0.518	0.002	3.69175e-49
CNKSR2	1.24822e-53	6.37782	0.582	0.017	2.26677e-49
OASL	4.61179e-22	6.28411	0.262	0.006	8.375e-18
TMEM178B	2.37526e-35	6.27801	0.404	0.011	4.31346e-31
SHANK2	2.16234e-40	6.27207	0.461	0.013	3.92681e-36
KCNQ5	3.72176e-27	6.25799	0.291	0.002	6.75871e-23
TRPM3	8.54356e-49	6.24075	0.546	0.017	1.55151e-44
GALNT18	3.53767e-56	6.21014	0.582	0.011	6.42441e-52
GPC5	1.97423e-23	6.19504	0.255	0.002	3.58521e-19
PDE10A	2.73942e-37	6.17313	0.44	0.015	4.97479e-33
SLC26A4	2.57649e-24	6.14943	0.277	0.004	4.6789e-20
MTCL1	1.24129e-28	6.14885	0.305	0.002	2.25419e-24
ANK3	2.92445e-95	6.11843	0.879	0.038	5.3108e-91
RCAN3	1.62848e-27	6.10585	0.305	0.004	2.95732e-23
MACROD2	4.19639e-42	5.96046	0.475	0.015	7.62064e-38
CDHR3	1.16964e-25	5.94806	0.277	0.002	2.12406e-21
BEND6	2.47202e-26	5.91457	0.305	0.006	4.48919e-22
EZH2	4.17989e-25	5.90112	0.284	0.004	7.59068e-21
COL4A6	1.50706e-36	5.82965	0.39	0.004	2.73683e-32
ADGRG2	2.98317e-40	5.81759	0.461	0.013	5.41744e-36
PRKX	2.42404e-26	5.81303	0.312	0.008	4.40207e-22
ANKRD31	2.48737e-24	5.78219	0.277	0.004	4.51706e-20
TMSB15B	3.30696e-49	5.7623	0.553	0.017	6.00544e-45
ICA1	2.31039e-50	5.75514	0.518	0.006	4.19568e-46
PRTG	8.76335e-29	5.74195	0.34	0.008	1.59142e-24
THSD7B	4.9903e-31	5.74058	0.34	0.004	9.06239e-27
OTOGL	1.65754e-23	5.72978	0.255	0.002	3.01009e-19
BCL2L10	6.62764e-23	5.7256	0.262	0.004	1.20358e-18
CDKL2	1.85066e-45	5.72299	0.489	0.008	3.36079e-41
RANBP3L	1.10278e-39	5.71207	0.44	0.008	2.00265e-35
ARHGAP8	7.55363e-35	5.67798	0.397	0.008	1.37174e-30
PDE1C	1.74946e-24	5.67416	0.305	0.013	3.17702e-20
GALNT9	1.02531e-40	5.64039	0.426	0.004	1.86196e-36
MTFR2	5.02469e-28	5.59223	0.298	0.002	9.12483e-24
EFNA5	1.06254e-86	5.59042	0.865	0.059	1.92957e-82
PLIN2	2.41541e-35	5.58039	0.418	0.013	4.38638e-31
OCA2	6.64948e-33	5.56656	0.369	0.006	1.20755e-28
SEMA3A	1.36244e-26	5.56345	0.298	0.004	2.47418e-22
OSBPL6	1.4493e-30	5.55307	0.355	0.008	2.63192e-26
TAFA5	5.33969e-24	5.54698	0.298	0.011	9.69687e-20
RETREG1	4.39101e-39	5.51784	0.411	0.004	7.97407e-35
HVCN1	7.14948e-23	5.5056	0.262	0.004	1.29835e-18
ARNT2	7.97488e-44	5.47524	0.475	0.008	1.44824e-39
NKAIN3	8.55217e-23	5.46674	0.305	0.015	1.55307e-18
FGFRL1	1.23178e-81	5.45055	0.844	0.055	2.23692e-77
PTPRK	6.59414e-98	5.43406	0.929	0.057	1.1975e-93
LMAN1L	5.67556e-24	5.42178	0.284	0.006	1.03068e-19
TAF3	9.60722e-51	5.41443	0.532	0.008	1.74467e-46
KCNK5	4.53191e-34	5.40758	0.39	0.008	8.22995e-30
HOXB6	8.18543e-55	5.39785	0.638	0.038	1.48647e-50
PPP1R1B	1.20459e-26	5.30031	0.298	0.004	2.18753e-22
TLE4	5.42759e-75	5.28601	0.801	0.055	9.85651e-71
AMOT	3.50767e-25	5.27231	0.312	0.011	6.36993e-21
FHIT	8.05314e-37	5.24842	0.468	0.025	1.46245e-32
ANAPC10	3.13837e-30	5.2483	0.355	0.008	5.69927e-26
NBEA	2.67327e-59	5.2267	0.667	0.03	4.85466e-55
HSPA2	7.83992e-54	5.21351	0.631	0.034	1.42373e-49
DPP4	6.97364e-60	5.21012	0.688	0.042	1.26641e-55
GARNL3	7.72524e-31	5.16619	0.383	0.015	1.4029e-26
NKD1	1.65026e-67	5.12247	0.752	0.042	2.99687e-63
PFKP	1.72993e-57	5.12242	0.667	0.036	3.14154e-53
SLC35F1	8.3488e-28	5.12189	0.369	0.019	1.51614e-23
TSNARE1	7.74624e-60	5.05973	0.674	0.034	1.40672e-55
ARL15	5.88767e-79	5.0534	0.844	0.074	1.0692e-74
ANK2	3.68041e-75	5.0404	0.837	0.097	6.68363e-71
HS6ST3	1.13884e-24	5.03463	0.348	0.023	2.06813e-20
STOX2	3.44973e-47	5.0323	0.546	0.019	6.26472e-43
FAM135A	9.23033e-36	5.02259	0.44	0.017	1.67623e-31
FREM2	6.91241e-29	4.98703	0.376	0.017	1.25529e-24
WT1	3.75832e-59	4.98303	0.681	0.036	6.82511e-55
PLEKHG1	2.80873e-53	4.9428	0.631	0.034	5.10065e-49
CLMN	9.58039e-52	4.89565	0.567	0.015	1.7398e-47
CCDC171	7.26616e-46	4.89188	0.567	0.034	1.31953e-41
GNE	2.86657e-41	4.88268	0.511	0.025	5.20569e-37
PPM1H	2.50638e-31	4.82807	0.39	0.015	4.55158e-27
SCG2	9.1421e-29	4.82679	0.34	0.008	1.6602e-24
SLC4A4	7.23094e-56	4.8162	0.66	0.036	1.31314e-51
CACNB2	1.23639e-21	4.81205	0.369	0.044	2.24529e-17
SH3TC1	1.85746e-33	4.80394	0.383	0.008	3.37314e-29
BEND5	6.71492e-46	4.77863	0.567	0.03	1.21943e-41
SLC44A5	2.80881e-26	4.76137	0.305	0.006	5.1008e-22
KNDC1	1.44281e-31	4.75298	0.426	0.025	2.62015e-27
UNC5C	1.22432e-53	4.74147	0.688	0.059	2.22336e-49
TRPS1	3.64253e-61	4.72375	0.745	0.059	6.61483e-57
FOXP2	1.29774e-48	4.71671	0.645	0.057	2.35669e-44
APC	1.12553e-62	4.70833	0.738	0.057	2.04397e-58
DPP6	3.52626e-29	4.69154	0.362	0.013	6.40369e-25
MCC	2.92903e-62	4.6802	0.745	0.064	5.31912e-58
BANP	6.65601e-25	4.63853	0.312	0.011	1.20873e-20
STXBP6	2.11466e-33	4.6194	0.44	0.025	3.84022e-29
TET1	2.5442e-47	4.59466	0.567	0.025	4.62027e-43
KLHL29	3.51722e-61	4.59106	0.745	0.07	6.38726e-57
ABCC4	1.18926e-33	4.56937	0.454	0.028	2.15969e-29
SLC35F2	5.24045e-31	4.5648	0.411	0.021	9.51665e-27
TRAM1L1	9.1368e-29	4.5469	0.34	0.008	1.65924e-24
NEU3	4.37312e-20	4.54314	0.277	0.015	7.94158e-16
SDK1	3.70166e-47	4.5429	0.589	0.034	6.72221e-43
FARS2	1.18009e-39	4.54123	0.489	0.021	2.14304e-35
AUTS2	3.69669e-98	4.52974	0.957	0.186	6.71319e-94
LY75	4.95059e-33	4.50248	0.39	0.011	8.99026e-29
RAD51B	9.00623e-59	4.49765	0.738	0.064	1.63553e-54
FMN1	1.38614e-29	4.49722	0.383	0.017	2.51723e-25
TNFAIP8	1.47411e-37	4.49628	0.447	0.015	2.67698e-33
APBA1	4.10758e-24	4.4769	0.27	0.004	7.45936e-20
ENOX1	2.05968e-24	4.45772	0.348	0.023	3.74039e-20
RALGPS1	2.25336e-41	4.43624	0.525	0.028	4.0921e-37
FRMD3	1.35057e-39	4.41821	0.504	0.025	2.45264e-35
MME	4.32195e-43	4.41089	0.574	0.042	7.84867e-39
GMDS	1.40839e-40	4.39575	0.518	0.028	2.55763e-36
ROBO1	5.12303e-72	4.39567	0.879	0.172	9.30341e-68
DACH1	3.05927e-64	4.38871	0.816	0.148	5.55564e-60
ROR2	3.35169e-41	4.38063	0.553	0.044	6.08667e-37
DAGLA	1.07284e-32	4.37642	0.433	0.023	1.94827e-28
SLC45A1	8.98063e-26	4.37482	0.298	0.006	1.63088e-21
TENM4	4.06177e-22	4.37224	0.319	0.021	7.37617e-18
HOXA3	5.1596e-24	4.33755	0.362	0.032	9.36983e-20
PTN	1.13578e-29	4.32863	0.411	0.025	2.06257e-25
CDC14A	3.18382e-46	4.32077	0.61	0.047	5.78182e-42
KALRN	2.23301e-65	4.31735	0.801	0.083	4.05515e-61
FBRSL1	2.7444e-90	4.31535	0.95	0.127	4.98383e-86
GATA4	3.57011e-23	4.30589	0.333	0.021	6.48332e-19
SGCD	1.18627e-45	4.29494	0.61	0.053	2.15426e-41
SEMA6D	3.72409e-34	4.28275	0.426	0.017	6.76295e-30
DMD	7.40828e-67	4.25563	0.858	0.144	1.34534e-62
UBAP2	7.6083e-59	4.25201	0.73	0.057	1.38167e-54
AFG1L	8.69453e-22	4.25173	0.298	0.015	1.57893e-17
ELL2	9.63007e-38	4.2512	0.582	0.074	1.74882e-33
ARL6	2.7785e-56	4.24933	0.681	0.042	5.04575e-52
CELSR1	6.45373e-44	4.24221	0.496	0.015	1.172e-39
PRKCE	2.45923e-43	4.232	0.574	0.04	4.46596e-39
MMP16	1.68134e-21	4.22646	0.319	0.023	3.05332e-17
AFF2	1.22066e-37	4.21901	0.504	0.032	2.21672e-33
ARID1B	4.35987e-92	4.21561	0.943	0.148	7.91752e-88
TMEM131L	2.34749e-33	4.21408	0.44	0.023	4.26305e-29
MAGI1	5.24189e-46	4.21187	0.631	0.061	9.51928e-42
TEAD4	2.95251e-19	4.20518	0.284	0.019	5.36175e-15
DISC1	4.0785e-36	4.20282	0.504	0.038	7.40655e-32
SERPINI1	2.35313e-27	4.20072	0.383	0.023	4.27328e-23
FIGN	5.24452e-30	4.19602	0.454	0.044	9.52405e-26
DOK6	2.17482e-41	4.17454	0.532	0.03	3.94947e-37
SLC37A4	7.06554e-51	4.16893	0.652	0.047	1.2831e-46
LRRC28	2.05528e-22	4.16195	0.319	0.019	3.73239e-18
BMPR1B	5.54851e-24	4.10876	0.348	0.023	1.00761e-19
CALM1	5.96004e-48	4.10396	0.61	0.038	1.08234e-43
ABCB11	1.90533e-27	4.09205	0.333	0.011	3.46007e-23
NT5DC3	1.88313e-19	4.0918	0.333	0.038	3.41976e-15
BNC2	4.65005e-69	4.07665	0.872	0.197	8.44448e-65
ZNF518B	3.43978e-37	4.0709	0.525	0.04	6.24664e-33
SIPA1L2	1.92876e-21	4.03304	0.333	0.03	3.50263e-17
XRCC4	6.02949e-24	4.03297	0.348	0.023	1.09496e-19
ZRSR2	1.09433e-24	4.02072	0.319	0.013	1.9873e-20
PIK3AP1	4.47352e-22	4.01928	0.284	0.011	8.1239e-18
RBKS	1.55477e-20	4.01212	0.312	0.023	2.82346e-16
YPEL1	1.39075e-24	4.0075	0.284	0.006	2.52561e-20
EML1	2.3837e-39	4.00487	0.553	0.044	4.32881e-35
MET	3.19848e-26	3.98397	0.39	0.03	5.80843e-22
HIC2	6.7635e-39	3.97924	0.532	0.038	1.22825e-34
FAM219A	2.79023e-30	3.94863	0.433	0.032	5.06706e-26
DISP1	1.26686e-42	3.93476	0.567	0.038	2.30063e-38
TBL1X	5.41904e-43	3.92776	0.582	0.042	9.84097e-39
ZNF608	9.52984e-58	3.92749	0.738	0.064	1.73062e-53
ESR1	2.04653e-22	3.92446	0.411	0.061	3.71649e-18
FGGY	2.37384e-30	3.92258	0.411	0.023	4.31089e-26
SUGCT	4.48534e-30	3.92113	0.447	0.038	8.14538e-26
CDK19	7.305e-19	3.91265	0.305	0.028	1.32659e-14
GABRB2	7.96812e-16	3.91102	0.255	0.023	1.44701e-11
FHOD3	2.55761e-34	3.90578	0.546	0.068	4.64462e-30
GPC6	1.72982e-21	3.90018	0.397	0.078	3.14135e-17
WDR89	5.17004e-42	3.89575	0.567	0.04	9.38879e-38
EIF4EBP1	1.83352e-24	3.87549	0.348	0.021	3.32968e-20
SH3KBP1	6.58177e-48	3.86715	0.688	0.085	1.19525e-43
ZMIZ1	1.17691e-73	3.86504	0.887	0.178	2.13727e-69
SGO2	8.31482e-20	3.86403	0.277	0.015	1.50997e-15
SPATA5	1.70798e-22	3.86303	0.34	0.025	3.10169e-18
SLIT2	1.14185e-55	3.86016	0.809	0.294	2.0736e-51
MPP7	2.63029e-33	3.85753	0.447	0.025	4.7766e-29
PPIA	1.05292e-50	3.85003	0.681	0.059	1.91211e-46
CHGA	3.09141e-19	3.84348	0.305	0.025	5.614e-15
STK26	2.24376e-23	3.83964	0.27	0.006	4.07468e-19
HECW1	2.12071e-18	3.83566	0.262	0.015	3.8512e-14
RAD23B	2.40189e-55	3.83336	0.745	0.085	4.36183e-51
RALGAPA2	3.64825e-21	3.83211	0.326	0.025	6.62523e-17
IQGAP2	1.33415e-41	3.82007	0.652	0.104	2.42281e-37
NCALD	3.33938e-40	3.79824	0.61	0.072	6.06431e-36
RAVER1	7.00796e-58	3.79003	0.738	0.061	1.27265e-53
ARHGAP28	5.71118e-20	3.78216	0.319	0.028	1.03715e-15
COMMD10	1.7871e-33	3.77091	0.468	0.032	3.24537e-29
H3F3B	1.09972e-53	3.76892	0.667	0.042	1.99709e-49
EGFR	5.39104e-47	3.76541	0.759	0.14	9.79014e-43
CCAR1	1.745e-24	3.75642	0.348	0.021	3.16891e-20
PLEKHA7	2.07948e-37	3.75556	0.496	0.03	3.77633e-33
ATP1A1	5.96198e-70	3.75306	0.894	0.167	1.0827e-65
XPO1	7.32477e-41	3.74476	0.617	0.07	1.33018e-36
ARHGEF3	3.24386e-48	3.72442	0.723	0.104	5.89085e-44
TUBA1A	3.92119e-21	3.7185	0.319	0.023	7.12089e-17
MYCBP2	1.09155e-59	3.7141	0.809	0.112	1.98226e-55
TBC1D8	5.5999e-30	3.70249	0.447	0.036	1.01694e-25
KLHL9	6.47589e-21	3.70085	0.348	0.034	1.17602e-16
FRY	6.82832e-35	3.689	0.461	0.025	1.24002e-30
BCAS3	7.5595e-42	3.68792	0.631	0.074	1.37281e-37
CDK6	3.42498e-38	3.65637	0.617	0.081	6.21977e-34
PRR5	8.6307e-22	3.64656	0.333	0.025	1.56734e-17
ANO5	2.38627e-18	3.64614	0.305	0.03	4.33347e-14
VTI1A	2.11678e-46	3.63868	0.681	0.087	3.84407e-42
WWC1	1.51307e-37	3.63354	0.482	0.025	2.74774e-33
CTDSPL	1.14357e-58	3.6329	0.801	0.108	2.07672e-54
BMP7	1.04383e-21	3.62464	0.319	0.021	1.8956e-17
LRCH1	6.44049e-37	3.60963	0.574	0.064	1.16959e-32
TGFB2	4.76955e-22	3.60922	0.355	0.032	8.66151e-18
HS6ST2	1.08688e-22	3.60178	0.305	0.015	1.97377e-18
ADGRL3	8.47684e-41	3.59251	0.589	0.053	1.53939e-36
RTN1	4.04405e-17	3.58955	0.262	0.019	7.344e-13
NANOS1	7.24499e-18	3.58895	0.284	0.023	1.31569e-13
GNPTAB	6.54743e-30	3.5831	0.482	0.053	1.18901e-25
SRGAP1	2.97539e-47	3.58067	0.702	0.087	5.40331e-43
CD82	9.34294e-30	3.57682	0.433	0.032	1.69668e-25
CELF2	1.70986e-54	3.57418	0.794	0.129	3.1051e-50
JADE3	6.58879e-31	3.56743	0.496	0.055	1.19652e-26
AIF1L	3.82204e-25	3.566	0.404	0.038	6.94082e-21
PTPRJ	1.39249e-19	3.55534	0.326	0.032	2.52876e-15
RBM10	4.81844e-67	3.55498	0.865	0.127	8.75028e-63
SUPT3H	5.85029e-22	3.55281	0.383	0.044	1.06241e-17
GLIS3	1.18645e-24	3.54845	0.44	0.061	2.1546e-20
PBX3	4.89956e-73	3.53811	0.929	0.246	8.8976e-69
RASSF9	5.64522e-39	3.53676	0.582	0.059	1.02517e-34
DENND1A	1.36301e-54	3.52661	0.78	0.108	2.47523e-50
FRMD4A	4.36566e-36	3.52413	0.61	0.091	7.92803e-32
BEGAIN	1.74157e-16	3.51845	0.262	0.021	3.16269e-12
ZC3H8	1.49855e-27	3.51323	0.404	0.03	2.72136e-23
ENTPD1	1.81614e-30	3.50428	0.44	0.032	3.29812e-26
TRANK1	1.11586e-49	3.4959	0.759	0.121	2.0264e-45
CDKAL1	1.39001e-52	3.49285	0.759	0.106	2.52425e-48
DIAPH2	3.21074e-49	3.48453	0.709	0.085	5.83071e-45
FNBP1L	1.8886e-35	3.47786	0.539	0.053	3.4297e-31
CDYL	4.97223e-33	3.47765	0.475	0.036	9.02957e-29
ANKS1B	6.89878e-16	3.46701	0.326	0.059	1.25282e-11
LRP12	9.05909e-27	3.46649	0.376	0.023	1.64513e-22
TBC1D22A	3.58621e-25	3.46571	0.447	0.061	6.51256e-21
ZNF521	2.90403e-46	3.45755	0.738	0.15	5.27371e-42
PRKD1	2.36611e-49	3.45752	0.695	0.07	4.29686e-45
KDM6A	3.35966e-54	3.45213	0.759	0.095	6.10115e-50
GLCCI1	1.71821e-22	3.44708	0.333	0.023	3.12027e-18
ELMO1	2.26024e-25	3.44008	0.411	0.04	4.1046e-21
TMCC1	6.78745e-36	3.43837	0.496	0.034	1.2326e-31
ITGB8	6.36387e-52	3.43409	0.823	0.176	1.15568e-47
CARMIL1	6.73742e-40	3.42932	0.624	0.083	1.22352e-35
THSD4	8.07121e-68	3.42733	0.908	0.201	1.46573e-63
TMTC2	1.10386e-22	3.42601	0.355	0.03	2.0046e-18
RASAL2	3.69292e-39	3.42578	0.603	0.068	6.70634e-35
SHB	5.15059e-24	3.42435	0.404	0.044	9.35348e-20
CPPED1	5.05753e-26	3.42011	0.376	0.025	9.18448e-22
GPHN	4.11795e-42	3.40905	0.652	0.081	7.4782e-38
TRAPPC9	1.1053e-56	3.40626	0.837	0.159	2.00722e-52
ATP8A1	6.82723e-34	3.40511	0.567	0.074	1.23982e-29
SGF29	1.39354e-34	3.40167	0.518	0.047	2.53066e-30
MED27	8.91744e-20	3.39873	0.291	0.019	1.61941e-15
CCDC91	1.54735e-47	3.39615	0.738	0.112	2.80999e-43
CHCHD6	2.31921e-17	3.38502	0.312	0.036	4.21169e-13
POLA1	2.46265e-22	3.38135	0.369	0.036	4.47217e-18
PTPN3	3.68753e-21	3.38008	0.326	0.025	6.69656e-17
SPOPL	5.20202e-26	3.37959	0.383	0.028	9.44686e-22
ZHX1	9.54179e-56	3.3772	0.809	0.123	1.73279e-51
SASH1	2.61622e-17	3.3762	0.404	0.097	4.75105e-13
PDE8A	1.56085e-38	3.34997	0.688	0.163	2.8345e-34
PCDH9	3.95053e-21	3.34336	0.383	0.047	7.17417e-17
LLGL2	1.52379e-22	3.34007	0.34	0.025	2.7672e-18
RPAP3	2.05197e-14	3.33363	0.255	0.028	3.72638e-10
WIPF3	5.08799e-23	3.33293	0.376	0.036	9.23978e-19
CD24	1.14337e-23	3.32885	0.383	0.036	2.07635e-19
KANK1	2.77352e-46	3.32201	0.745	0.127	5.03671e-42
OSBPL10	1.73471e-16	3.31914	0.298	0.034	3.15024e-12
FGFR2	2.48381e-29	3.31589	0.518	0.072	4.5106e-25
GREB1L	4.19429e-25	3.31428	0.426	0.047	7.61683e-21
WAC	1.58696e-27	3.31419	0.44	0.042	2.88191e-23
PHIP	1.52174e-44	3.31175	0.702	0.104	2.76348e-40
RBMXL1	6.43687e-35	3.31165	0.532	0.051	1.16893e-30
TEAD1	2.17101e-43	3.2991	0.681	0.091	3.94256e-39
ZNF407	3.43205e-44	3.29017	0.702	0.104	6.2326e-40
SLC38A1	1.28751e-16	3.28838	0.277	0.025	2.33812e-12
CPNE8	2.00566e-18	3.284	0.326	0.036	3.64227e-14
FBXL7	1.24089e-25	3.27461	0.496	0.091	2.25345e-21
PRRG1	2.08778e-32	3.27172	0.518	0.055	3.79142e-28
SOX5	2.04483e-28	3.26901	0.525	0.089	3.71341e-24
EIF4EBP3	1.58064e-37	3.2668	0.56	0.053	2.87044e-33
GAB2	2.8442e-22	3.26541	0.44	0.074	5.16507e-18
SEMA4D	5.87083e-28	3.26372	0.454	0.047	1.06614e-23
LCLAT1	3.77819e-25	3.26095	0.426	0.047	6.8612e-21
KIAA0232	8.19846e-37	3.25571	0.61	0.093	1.48884e-32
HDAC9	1.06661e-15	3.25351	0.284	0.032	1.93695e-11
TET2	3.80421e-34	3.25178	0.525	0.051	6.90845e-30
AP1S2	1.29678e-25	3.23875	0.397	0.034	2.35496e-21
RAPGEF2	6.36076e-39	3.23833	0.645	0.093	1.15511e-34
ARHGAP31	1.37752e-13	3.23801	0.262	0.034	2.50158e-09
PTPRF	2.92489e-55	3.23712	0.823	0.138	5.3116e-51
GAREM1	2.25511e-27	3.23566	0.454	0.049	4.09528e-23
TMEM241	5.68502e-14	3.23485	0.255	0.03	1.0324e-09
GULP1	2.32775e-35	3.22752	0.624	0.1	4.22719e-31
MAML2	1.02424e-28	3.22365	0.532	0.085	1.86003e-24
BACH2	1.33942e-21	3.22169	0.284	0.013	2.43238e-17
FAM49B	4.32601e-28	3.22104	0.44	0.04	7.85603e-24
NCOA2	7.54461e-35	3.21068	0.61	0.097	1.3701e-30
CRYBG3	1.39016e-45	3.21028	0.681	0.078	2.52452e-41
ETV6	1.66598e-37	3.20931	0.638	0.102	3.02542e-33
MAD1L1	6.22549e-24	3.20927	0.362	0.028	1.13055e-19
KIAA0825	5.70759e-29	3.20488	0.475	0.051	1.0365e-24
GALNT7	7.55509e-20	3.20437	0.348	0.038	1.372e-15
EFL1	5.89338e-23	3.20372	0.376	0.036	1.07024e-18
MS4A4A	2.32763e-27	3.19998	0.454	0.049	4.22698e-23
SYNCRIP	3.9342e-17	3.19396	0.27	0.021	7.14452e-13
RAPGEF6	3.95303e-21	3.18406	0.362	0.038	7.17871e-17
CYB5R2	2.67122e-17	3.18129	0.284	0.025	4.85093e-13
EML6	2.15239e-19	3.18124	0.319	0.03	3.90874e-15
KIAA1549	1.1971e-15	3.17884	0.312	0.044	2.17394e-11
RREB1	2.21717e-46	3.15973	0.702	0.089	4.02639e-42
ARHGAP24	8.45013e-17	3.14223	0.291	0.03	1.53454e-12
ASCC3	2.40891e-30	3.14219	0.504	0.057	4.37459e-26
RFX3	4.85611e-33	3.13322	0.539	0.061	8.81869e-29
PDE4D	5.31153e-25	3.12889	0.44	0.053	9.64574e-21
FKBP5	1.92052e-55	3.11831	0.865	0.193	3.48766e-51
ARHGAP6	2.80735e-25	3.11768	0.411	0.04	5.09814e-21
TBC1D5	2.48491e-47	3.11506	0.794	0.165	4.5126e-43
CHD7	8.81041e-15	3.09505	0.284	0.036	1.59997e-10
SEMA3D	7.5511e-26	3.09372	0.433	0.047	1.37128e-21
BAZ1A	3.50649e-31	3.08116	0.496	0.051	6.36779e-27
MSH3	1.41753e-22	3.07885	0.411	0.053	2.57423e-18
LDLRAD4	2.01475e-23	3.07859	0.461	0.074	3.65878e-19
TMTC4	5.66011e-18	3.07516	0.298	0.028	1.02788e-13
SCAPER	1.42016e-26	3.07324	0.461	0.055	2.57902e-22
GNG5	6.37861e-19	3.06803	0.326	0.034	1.15836e-14
TBC1D32	1.26943e-20	3.06408	0.326	0.028	2.30528e-16
MIPOL1	1.93914e-24	3.05948	0.418	0.047	3.52148e-20
PLCL1	1.24534e-11	3.05687	0.262	0.049	2.26155e-07
RAP1GDS1	7.50958e-30	3.05491	0.511	0.064	1.36374e-25
FAM172A	2.63753e-43	3.05333	0.688	0.093	4.78975e-39
ZNF462	5.358e-44	3.0492	0.752	0.155	9.73013e-40
TULP4	1.51979e-27	3.04898	0.475	0.057	2.75994e-23
SCUBE1	4.48807e-13	3.04748	0.262	0.036	8.15034e-09
RNF38	5.41493e-46	3.0354	0.78	0.155	9.83351e-42
TENM3	5.76669e-21	3.02727	0.447	0.081	1.04723e-16
UPF2	5.12688e-23	3.02252	0.433	0.059	9.31041e-19
PTPN2	8.31739e-16	3.02218	0.305	0.04	1.51044e-11
RSU1	9.62667e-27	3.00656	0.518	0.087	1.7482e-22
ADCY5	4.22516e-23	2.99783	0.447	0.066	7.6729e-19
C12orf75	4.6816e-26	2.99413	0.546	0.106	8.50178e-22
GPT2	1.67324e-14	2.9923	0.27	0.032	3.03861e-10
SFSWAP	1.50568e-32	2.98832	0.539	0.064	2.73431e-28
ZNF618	8.40768e-33	2.98711	0.567	0.078	1.52684e-28
CNNM2	7.66858e-23	2.98449	0.496	0.1	1.39261e-18
SRPK2	2.68427e-30	2.98123	0.596	0.117	4.87464e-26
NFIA	4.53572e-73	2.97878	0.972	0.369	8.23687e-69
ZMYND11	1.72728e-53	2.9763	0.844	0.172	3.13675e-49
RPGR	2.21207e-20	2.97533	0.383	0.051	4.01713e-16
RESF1	5.66448e-38	2.97383	0.681	0.119	1.02867e-33
PIK3CB	3.78557e-26	2.97168	0.475	0.064	6.87459e-22
ADK	7.35703e-26	2.971	0.518	0.095	1.33604e-21
PTPRM	9.83726e-24	2.96357	0.496	0.1	1.78645e-19
SMAD1	2.32787e-19	2.96153	0.348	0.04	4.22741e-15
EP400	1.33682e-16	2.95559	0.27	0.023	2.42767e-12
CUX1	3.44243e-45	2.95504	0.766	0.155	6.25146e-41
SLC44A3	1.43945e-19	2.95431	0.326	0.032	2.61405e-15
JARID2	1.36267e-16	2.95302	0.305	0.036	2.47462e-12
FAM49A	4.37937e-18	2.95223	0.348	0.047	7.95294e-14
FRAS1	2.38175e-33	2.94839	0.546	0.064	4.32525e-29
SHROOM3	2.15058e-19	2.94519	0.383	0.055	3.90545e-15
TNPO1	3.02003e-39	2.94507	0.66	0.097	5.48437e-35
TCF7L2	1.96665e-42	2.93924	0.752	0.169	3.57144e-38
MOB1B	5.91943e-30	2.92046	0.489	0.053	1.07497e-25
WDR7	9.49834e-16	2.91797	0.284	0.032	1.7249e-11
BCL9	5.40452e-14	2.91523	0.284	0.04	9.81461e-10
AGAP1	1.80537e-29	2.91491	0.582	0.114	3.27855e-25
SH3BP4	2.25713e-24	2.91388	0.461	0.066	4.09894e-20
SH3RF1	4.65449e-26	2.9084	0.482	0.068	8.45255e-22
FRYL	2.46985e-41	2.90745	0.723	0.127	4.48524e-37
RALGAPA1	8.87339e-43	2.90528	0.695	0.1	1.61141e-38
STS	1.03261e-23	2.89865	0.468	0.074	1.87522e-19
USP54	9.34833e-18	2.89774	0.348	0.049	1.69766e-13
LRBA	6.71731e-41	2.89738	0.745	0.155	1.21986e-36
OSBPL5	3.07672e-19	2.89351	0.362	0.047	5.58732e-15
USP45	1.16493e-26	2.89158	0.404	0.034	2.11551e-22
PPP1R12A	7.6799e-49	2.88	0.809	0.155	1.39467e-44
MAP3K21	6.33738e-13	2.87999	0.27	0.04	1.15087e-08
SLC9A8	1.8787e-21	2.87946	0.376	0.042	3.41173e-17
MCU	6.41186e-17	2.87788	0.27	0.023	1.16439e-12
RALYL	6.17782e-21	2.87681	0.404	0.057	1.12189e-16
DIP2C	2.27063e-33	2.87337	0.645	0.133	4.12347e-29
PRKAR2A	3.17778e-26	2.87108	0.532	0.1	5.77085e-22
CLYBL	1.41492e-16	2.85887	0.305	0.036	2.56949e-12
ARHGEF28	1.12134e-32	2.85097	0.631	0.114	2.03635e-28
WWOX	4.14248e-27	2.84988	0.638	0.193	7.52274e-23
AR	1.825e-23	2.84083	0.418	0.051	3.3142e-19
PARD3	1.85441e-47	2.83941	0.816	0.22	3.3676e-43
LRIG1	1.74768e-24	2.83776	0.475	0.074	3.17379e-20
PPP3CA	3.47021e-42	2.83736	0.766	0.165	6.30189e-38
RARRES1	2.07596e-09	2.83215	0.284	0.078	3.76994e-05
NAV3	5.48038e-15	2.8288	0.383	0.091	9.95236e-11
ZNF827	1.27178e-19	2.82693	0.397	0.061	2.30955e-15
NAV2	4.00702e-36	2.82624	0.652	0.108	7.27675e-32
FGD4	3.62546e-30	2.82128	0.567	0.091	6.58383e-26
BRAF	1.83465e-24	2.81649	0.433	0.053	3.33172e-20
DENND1B	3.41668e-23	2.80851	0.404	0.047	6.20468e-19
ANKRD6	6.98597e-16	2.80662	0.312	0.042	1.26865e-11
EPSTI1	1.55233e-12	2.80233	0.305	0.061	2.81903e-08
ZC3H13	4.96351e-26	2.80139	0.496	0.074	9.01374e-22
ELP4	6.23398e-14	2.79963	0.262	0.032	1.13209e-09
INO80	4.34859e-25	2.79409	0.44	0.053	7.89704e-21
ADNP	2.46599e-39	2.79344	0.695	0.119	4.47825e-35
ATP5PO	1.58129e-14	2.78986	0.27	0.032	2.87162e-10
CDPF1	4.0193e-15	2.78861	0.277	0.032	7.29904e-11
TMEM144	1.8048e-18	2.78714	0.326	0.036	3.27752e-14
UHRF2	1.3189e-23	2.78657	0.518	0.106	2.39512e-19
TMEM231	1.01018e-16	2.7778	0.312	0.038	1.83449e-12
MAP4K4	8.21206e-34	2.77465	0.638	0.112	1.49131e-29
FRMD4B	1.62568e-14	2.77114	0.291	0.04	2.95224e-10
NME7	7.49547e-16	2.76753	0.312	0.042	1.36118e-11
BACE2	1.62507e-25	2.76041	0.546	0.11	2.95112e-21
CARNMT1	1.05156e-24	2.75841	0.418	0.047	1.90964e-20
TSHZ1	6.03938e-22	2.7542	0.454	0.076	1.09675e-17
AMMECR1	1.536e-24	2.75298	0.39	0.036	2.78938e-20
LRRFIP1	7.69218e-28	2.75133	0.496	0.066	1.3969e-23
ALDH7A1	1.00412e-16	2.74929	0.312	0.038	1.82349e-12
MBNL3	1.96023e-27	2.74879	0.553	0.102	3.55978e-23
LRRC38	8.89371e-14	2.74273	0.277	0.038	1.6151e-09
SBF2	2.67945e-44	2.74058	0.759	0.138	4.86588e-40
TLN2	1.07614e-30	2.73994	0.574	0.091	1.95427e-26
EXOC4	1.24419e-41	2.73681	0.759	0.163	2.25944e-37
ERICH1	1.03305e-12	2.73597	0.277	0.044	1.87602e-08
REV3L	2.72286e-28	2.73057	0.539	0.085	4.94471e-24
GHR	9.12058e-19	2.72901	0.447	0.1	1.6563e-14
ABLIM2	1.58895e-15	2.72678	0.298	0.038	2.88554e-11
NME1	4.6051e-27	2.72301	0.489	0.066	8.36286e-23
NR3C2	1.08669e-27	2.72286	0.532	0.085	1.97343e-23
ZDHHC20	1.41221e-29	2.72058	0.532	0.074	2.56458e-25
FAM171A1	2.47064e-22	2.71834	0.426	0.059	4.48668e-18
TRAK1	1.57277e-33	2.71735	0.638	0.117	2.85615e-29
CHST11	5.64151e-14	2.71473	0.312	0.053	1.0245e-09
PTBP1	4.71699e-23	2.71322	0.447	0.066	8.56605e-19
SNX29	2.32041e-26	2.71244	0.482	0.066	4.21386e-22
CCT6B	1.50932e-18	2.70721	0.277	0.021	2.74093e-14
ARL5B	1.55874e-13	2.70356	0.298	0.049	2.83066e-09
ARVCF	1.85402e-16	2.70001	0.298	0.034	3.3669e-12
MAMLD1	2.33714e-16	2.69842	0.277	0.028	4.24424e-12
PPM1K	3.13899e-16	2.69447	0.326	0.047	5.7004e-12
PHF14	7.37421e-37	2.69212	0.695	0.133	1.33916e-32
PACSIN2	8.18006e-35	2.69014	0.681	0.142	1.4855e-30
MITF	1.68313e-15	2.68911	0.326	0.051	3.05657e-11
FAT1	8.63237e-30	2.68908	0.567	0.091	1.56764e-25
HSD17B12	1.91233e-27	2.68696	0.539	0.089	3.47278e-23
STRBP	1.34089e-15	2.6831	0.34	0.057	2.43506e-11
STK3	2.21424e-21	2.68187	0.461	0.083	4.02106e-17
GPR155	8.28946e-16	2.68156	0.27	0.028	1.50537e-11
NCOA7	1.31991e-36	2.67549	0.723	0.163	2.39696e-32
HNRNPM	1.17678e-16	2.67359	0.355	0.057	2.13704e-12
MAP2K5	1.20399e-19	2.67307	0.411	0.068	2.18645e-15
CACNA2D1	5.26296e-26	2.66622	0.574	0.131	9.55753e-22
MAP4K3	2.91094e-34	2.6655	0.66	0.123	5.28626e-30
MNAT1	3.08825e-24	2.66502	0.489	0.081	5.60827e-20
RBM39	1.7787e-43	2.6642	0.787	0.167	3.23011e-39
ARHGAP42	3.93249e-25	2.6635	0.482	0.072	7.1414e-21
ROR1	3.89375e-17	2.66025	0.369	0.061	7.07106e-13
SUFU	1.35105e-15	2.65717	0.298	0.038	2.45352e-11
ATXN7L1	5.90535e-17	2.65652	0.362	0.059	1.07241e-12
CDK8	5.74835e-17	2.65341	0.319	0.04	1.0439e-12
PRKACB	8.38703e-27	2.65188	0.468	0.057	1.52308e-22
S1PR1	4.10183e-23	2.64705	0.411	0.051	7.44892e-19
PPFIBP2	1.17098e-26	2.64572	0.539	0.093	2.12649e-22
UPF3B	4.84852e-15	2.64187	0.291	0.038	8.80492e-11
DPH6	3.35817e-22	2.64155	0.504	0.104	6.09844e-18
BBS9	3.91518e-24	2.63291	0.56	0.133	7.10996e-20
CADM1	2.87302e-40	2.6316	0.738	0.138	5.21741e-36
FANCM	2.61267e-14	2.63112	0.277	0.036	4.7446e-10
ERBIN	2.62119e-41	2.63045	0.794	0.208	4.76009e-37
PCNT	3.53151e-25	2.62711	0.511	0.087	6.41322e-21
PLEKHH1	2.94383e-14	2.62656	0.27	0.034	5.34599e-10
RARRES2	3.96236e-40	2.62321	0.823	0.288	7.19565e-36
HLCS	5.54528e-22	2.62213	0.44	0.068	1.00702e-17
HSP90AA1	6.64572e-68	2.61948	0.972	0.53	1.20686e-63
MAP7D3	5.52473e-30	2.6181	0.532	0.072	1.00329e-25
TNFRSF19	4.93422e-21	2.6176	0.34	0.032	8.96055e-17
PRKN	3.57953e-18	2.61392	0.39	0.066	6.50043e-14
RBM23	8.82425e-44	2.61212	0.787	0.161	1.60248e-39
CLASP2	1.24538e-40	2.60976	0.73	0.131	2.26161e-36
XKR6	7.39814e-16	2.60058	0.312	0.042	1.3435e-11
HDAC11	3.89635e-15	2.59218	0.255	0.025	7.07578e-11
SLC20A2	1.8258e-24	2.59098	0.461	0.066	3.31566e-20
FMR1	1.16518e-34	2.59059	0.645	0.11	2.11598e-30
TXNL4B	1.83108e-16	2.59044	0.369	0.066	3.32525e-12
SMAP1	3.58427e-21	2.58776	0.397	0.053	6.50903e-17
KIF21A	4.76609e-15	2.58457	0.312	0.047	8.65522e-11
ZNF207	1.82702e-15	2.58388	0.312	0.044	3.31787e-11
PHLPP1	8.82104e-24	2.58374	0.468	0.072	1.6019e-19
DUSP16	1.96467e-25	2.58127	0.617	0.18	3.56784e-21
ZCCHC7	1.68692e-14	2.5811	0.376	0.085	3.06344e-10
NSD2	5.32413e-13	2.58059	0.277	0.042	9.66863e-09
MID1	7.37083e-26	2.57571	0.546	0.104	1.33854e-21
GTDC1	7.85779e-21	2.57347	0.44	0.074	1.42697e-16
PTBP2	5.56408e-21	2.56804	0.433	0.07	1.01044e-16
ARHGAP21	1.36701e-38	2.56676	0.773	0.201	2.4825e-34
EPB41L4B	1.83454e-14	2.56444	0.333	0.061	3.33152e-10
MAPKBP1	2.91721e-12	2.56333	0.262	0.04	5.29765e-08
LARGE1	1.35514e-17	2.562	0.411	0.081	2.46093e-13
MAP3K1	1.11664e-19	2.55686	0.489	0.114	2.02782e-15
MICU2	7.94229e-37	2.55239	0.652	0.102	1.44232e-32
RNASEH2B	7.8801e-13	2.5455	0.27	0.04	1.43103e-08
PAN3	5.63633e-36	2.54488	0.688	0.129	1.02356e-31
PITPNC1	1.694e-26	2.54377	0.596	0.138	3.07631e-22
CDK11B	3.53052e-19	2.54352	0.355	0.044	6.41142e-15
GSTCD	1.1401e-12	2.53155	0.262	0.038	2.07043e-08
SEMA6A	1.54396e-20	2.53025	0.56	0.159	2.80383e-16
PTPN14	9.27441e-32	2.52678	0.624	0.112	1.68423e-27
TLE1	5.38957e-27	2.5265	0.631	0.159	9.78746e-23
SLC25A12	5.44019e-21	2.52443	0.454	0.081	9.87938e-17
CDC14B	8.25479e-16	2.51469	0.34	0.055	1.49907e-11
PRDM11	2.83233e-15	2.51351	0.277	0.032	5.14352e-11
ZNF438	8.99676e-14	2.51312	0.319	0.057	1.63381e-09
LTO1	5.5195e-13	2.50793	0.291	0.049	1.00234e-08
MEF2A	7.81533e-29	2.50281	0.603	0.119	1.41926e-24
EPS8	2.72687e-24	2.50215	0.504	0.089	4.952e-20
SYNJ2	1.46083e-19	2.49743	0.362	0.047	2.65286e-15
GRB10	1.13857e-16	2.49364	0.433	0.102	2.06765e-12
FILIP1	1.16446e-13	2.49205	0.255	0.032	2.11465e-09
POU2F1	3.01897e-15	2.48766	0.369	0.074	5.48245e-11
TNRC6B	6.57255e-33	2.48502	0.723	0.186	1.19358e-28
SRSF1	2.15545e-29	2.48489	0.582	0.102	3.91429e-25
LCORL	1.43963e-15	2.48381	0.312	0.044	2.61436e-11
TDRD3	2.36456e-32	2.47951	0.667	0.138	4.29404e-28
MAP9	5.94029e-15	2.47853	0.277	0.034	1.07876e-10
BICD1	7.98918e-19	2.47161	0.411	0.072	1.45083e-14
BMPR1A	2.25527e-27	2.46818	0.596	0.123	4.09557e-23
CADPS2	1.40423e-26	2.46778	0.596	0.136	2.55009e-22
AKAP13	1.25921e-36	2.46759	0.78	0.229	2.28673e-32
HEATR5A	4.93878e-11	2.45944	0.255	0.044	8.96882e-07
FOXP1	4.01736e-36	2.44939	0.773	0.201	7.29553e-32
ZEB2	6.50994e-33	2.44734	0.794	0.322	1.18221e-28
PPIP5K2	1.7842e-25	2.44721	0.567	0.119	3.2401e-21
PIP4K2A	4.44033e-15	2.44698	0.291	0.038	8.06365e-11
SCFD2	1.88135e-13	2.44232	0.319	0.059	3.41653e-09
CYB561D2	5.48349e-18	2.44207	0.376	0.059	9.95801e-14
ATP1B1	2.75617e-24	2.4403	0.539	0.108	5.0052e-20
ATP6V0C	5.34269e-19	2.44015	0.418	0.074	9.70232e-15
CRPPA	2.00905e-17	2.44008	0.326	0.042	3.64843e-13
BRD9	6.98352e-16	2.43965	0.326	0.049	1.26821e-11
CAMK2D	3.19083e-24	2.43873	0.56	0.125	5.79454e-20
MTHFD1L	3.09959e-09	2.43638	0.284	0.078	5.62885e-05
THOC2	1.19842e-32	2.43543	0.667	0.136	2.17634e-28
YTHDC1	1.13687e-49	2.43532	0.844	0.169	2.06456e-45
WDR1	3.36457e-10	2.4331	0.255	0.051	6.11005e-06
ADARB1	3.15541e-13	2.42973	0.284	0.044	5.73022e-09
PLCB1	1.71498e-12	2.42468	0.34	0.078	3.1144e-08
FBXO34	9.02538e-27	2.42396	0.475	0.061	1.63901e-22
RBMS3	2.85782e-49	2.42306	0.943	0.36	5.1898e-45
ARID2	2.07328e-28	2.42088	0.61	0.127	3.76507e-24
PER2	1.25511e-23	2.41488	0.504	0.091	2.27927e-19
LPIN2	8.35974e-19	2.41415	0.39	0.061	1.51813e-14
ITSN1	7.66628e-26	2.41039	0.539	0.097	1.3922e-21
LMO7	1.03763e-30	2.40362	0.56	0.085	1.88434e-26
SLIT3	1.92102e-31	2.399	0.787	0.337	3.48858e-27
PLEKHG4	2.82015e-16	2.39277	0.326	0.047	5.1214e-12
TMEM135	7.20757e-27	2.39153	0.574	0.112	1.3089e-22
PDS5A	7.02736e-16	2.3872	0.312	0.042	1.27617e-11
ELF1	1.142e-22	2.3854	0.546	0.127	2.07387e-18
MAST4	1.68098e-24	2.38332	0.631	0.18	3.05265e-20
CTTNBP2	1.23198e-18	2.38293	0.319	0.036	2.23728e-14
CHM	1.20207e-17	2.38151	0.397	0.072	2.18296e-13
LURAP1L	5.40022e-13	2.37787	0.291	0.049	9.8068e-09
R3HDM1	3.45005e-15	2.37362	0.355	0.066	6.26529e-11
KIAA2026	6.68454e-32	2.3723	0.73	0.218	1.21391e-27
HPS3	9.55529e-21	2.37115	0.482	0.097	1.73524e-16
PLCB4	1.75526e-17	2.36833	0.369	0.059	3.18756e-13
MRTFB	9.45646e-19	2.36734	0.44	0.087	1.71729e-14
RCN2	2.16141e-20	2.3648	0.397	0.057	3.92513e-16
ROCK2	3.76251e-28	2.36443	0.638	0.146	6.83271e-24
FBXW11	3.40109e-16	2.36158	0.376	0.07	6.17638e-12
KCNQ1	6.82567e-25	2.36144	0.674	0.258	1.23954e-20
TCF12	1.11097e-34	2.36022	0.73	0.176	2.01751e-30
AUH	2.04661e-23	2.35889	0.603	0.167	3.71664e-19
SSBP3	2.44531e-19	2.35728	0.489	0.112	4.44068e-15
EEFSEC	2.81613e-13	2.35401	0.27	0.038	5.1141e-09
RBM5	1.02521e-44	2.35008	0.865	0.252	1.86179e-40
EPB41	2.06212e-19	2.3469	0.326	0.036	3.7448e-15
ADCY6	1.80501e-16	2.34103	0.447	0.108	3.2779e-12
WDFY3	6.01965e-30	2.3409	0.617	0.119	1.09317e-25
CCDC85C	2.09866e-14	2.3405	0.34	0.064	3.81116e-10
SENP7	2.62969e-16	2.33719	0.369	0.066	4.77551e-12
SGPP1	1.32281e-23	2.33509	0.567	0.131	2.40223e-19
GOLIM4	4.37811e-30	2.32696	0.681	0.169	7.95065e-26
AHCTF1	4.59039e-14	2.32534	0.262	0.032	8.33616e-10
CTDP1	4.85438e-18	2.32196	0.376	0.059	8.81555e-14
PAIP1	3.75376e-26	2.32163	0.546	0.1	6.81682e-22
SWT1	6.67203e-12	2.31931	0.277	0.049	1.21164e-07
DAD1	8.23217e-18	2.31737	0.348	0.049	1.49496e-13
BOD1L1	8.74732e-20	2.31147	0.504	0.119	1.58851e-15
DAB2IP	1.71387e-25	2.31136	0.539	0.1	3.11239e-21
ACVR2A	2.50698e-13	2.30789	0.333	0.068	4.55268e-09
RICTOR	7.59831e-22	2.30745	0.539	0.125	1.37985e-17
OSR1	1.25471e-15	2.30615	0.369	0.07	2.27855e-11
PPDPF	1.53834e-18	2.30376	0.489	0.119	2.79362e-14
VRK2	3.02881e-16	2.2927	0.355	0.059	5.50032e-12
MSANTD4	3.12255e-15	2.29038	0.298	0.04	5.67054e-11
NRIP1	2.99802e-31	2.2857	0.66	0.138	5.44441e-27
EVC2	4.86616e-15	2.28569	0.383	0.083	8.83694e-11
AFDN	1.27262e-41	2.28483	0.851	0.248	2.31107e-37
BCL2	8.59461e-22	2.28327	0.482	0.091	1.56078e-17
QKI	4.47702e-54	2.28259	0.957	0.386	8.13026e-50
CEP290	2.63421e-17	2.27671	0.376	0.064	4.78373e-13
EVA1C	9.35798e-18	2.27202	0.333	0.042	1.69941e-13
NCK2	5.30577e-14	2.27187	0.333	0.064	9.63528e-10
RCOR1	1.78192e-14	2.26975	0.319	0.053	3.23597e-10
IFI27L2	2.28424e-14	2.26598	0.411	0.104	4.14818e-10
MLLT10	1.04312e-18	2.26225	0.504	0.131	1.89431e-14
SGK3	2.07966e-15	2.25906	0.433	0.112	3.77666e-11
CDK14	1.08504e-08	2.25747	0.305	0.095	0.000197044
RBM47	2.11106e-30	2.24824	0.716	0.191	3.83368e-26
CASK	1.89161e-28	2.24571	0.66	0.159	3.43516e-24
DAPK1	7.59949e-21	2.23744	0.418	0.066	1.38007e-16
DNAJB6	8.12814e-17	2.23725	0.333	0.049	1.47607e-12
ANKRD28	9.24804e-15	2.23295	0.34	0.061	1.67944e-10
KDM4B	2.03205e-25	2.2264	0.574	0.121	3.69021e-21
RBMS1	9.24922e-37	2.22299	0.83	0.278	1.67966e-32
CMSS1	7.83654e-18	2.22249	0.404	0.074	1.42311e-13
KDM4C	1.05827e-17	2.22198	0.518	0.148	1.92181e-13
PDHX	1.39898e-12	2.22115	0.348	0.081	2.54055e-08
DTNA	3.86218e-16	2.21997	0.411	0.089	7.01373e-12
EML4	2.74743e-28	2.21339	0.723	0.225	4.98933e-24
RNF111	1.38384e-11	2.21285	0.277	0.051	2.51306e-07
TRDMT1	1.66916e-13	2.21198	0.284	0.044	3.0312e-09
RFTN2	8.4415e-10	2.20425	0.291	0.072	1.53298e-05
PSMB7	5.64265e-15	2.20371	0.333	0.057	1.02471e-10
BCKDHB	7.24276e-14	2.20316	0.362	0.081	1.31528e-09
CDC42SE2	4.50692e-18	2.18629	0.411	0.076	8.18457e-14
NUBPL	2.32004e-16	2.18487	0.326	0.049	4.21319e-12
ATG2A	7.84693e-16	2.17417	0.333	0.053	1.425e-11
AGPAT4	9.73171e-10	2.17274	0.255	0.053	1.76728e-05
TENM2	2.12512e-15	2.17061	0.333	0.057	3.85923e-11
PAPOLA	5.77529e-24	2.16728	0.574	0.131	1.04879e-19
PPP2R5C	8.88406e-20	2.16548	0.511	0.121	1.61335e-15
ZSWIM6	1.49144e-21	2.15664	0.518	0.112	2.70845e-17
KIF13B	1.02007e-27	2.1539	0.546	0.095	1.85244e-23
ZC3H3	2.48308e-16	2.15011	0.39	0.076	4.50927e-12
DLG2	1.63821e-10	2.14332	0.333	0.089	2.97499e-06
EXOC2	7.09091e-19	2.14185	0.411	0.072	1.28771e-14
ETNK1	1.92367e-18	2.14057	0.589	0.197	3.49338e-14
FOXN3	3.8051e-24	2.13843	0.624	0.169	6.91006e-20
NT5DC1	5.10685e-21	2.1371	0.489	0.1	9.27404e-17
METTL25	4.78061e-11	2.13591	0.27	0.051	8.68159e-07
SNX24	2.49851e-15	2.13391	0.369	0.072	4.53729e-11
LDAH	1.93286e-16	2.13348	0.433	0.1	3.51007e-12
USP10	4.80921e-17	2.13244	0.355	0.057	8.73353e-13
BAZ2B	1.65099e-27	2.12875	0.709	0.227	2.9982e-23
TBC1D1	2.78909e-11	2.12772	0.262	0.047	5.06498e-07
TMEM132C	8.60967e-13	2.1271	0.348	0.078	1.56352e-08
FKBP3	2.48004e-18	2.12593	0.362	0.055	4.50376e-14
ERC1	6.36792e-22	2.12503	0.582	0.153	1.15641e-17
CAPRIN1	1.65172e-15	2.12059	0.44	0.112	2.99953e-11
SLC35A3	4.37786e-14	2.11076	0.326	0.059	7.9502e-10
UTRN	1.35259e-27	2.11011	0.688	0.193	2.4563e-23
PRTFDC1	1.81758e-11	2.10955	0.305	0.066	3.30073e-07
EXD3	3.6415e-15	2.10861	0.383	0.081	6.61296e-11
IKZF2	7.56031e-12	2.10752	0.298	0.059	1.37295e-07
DTNBP1	4.22812e-11	2.10094	0.255	0.044	7.67827e-07
BBX	9.33119e-23	2.09943	0.589	0.153	1.69454e-18
NEDD9	2.89537e-14	2.09796	0.383	0.087	5.25799e-10
ZCCHC2	2.69561e-12	2.09501	0.312	0.064	4.89522e-08
HYKK	2.55166e-12	2.09208	0.255	0.038	4.63381e-08
GPATCH4	1.93562e-12	2.08889	0.284	0.051	3.51509e-08
RBM26	4.25139e-33	2.08505	0.667	0.131	7.72053e-29
ARHGAP10	3.14569e-17	2.08308	0.504	0.142	5.71257e-13
PPIB	8.98921e-33	2.08273	0.723	0.176	1.63244e-28
KLF12	2.97664e-20	2.08203	0.539	0.136	5.40559e-16
NECTIN3	7.34507e-16	2.08059	0.461	0.123	1.33386e-11
ANKRD10	1.56251e-34	2.0798	0.78	0.212	2.83752e-30
HDAC4	1.20024e-24	2.07028	0.596	0.14	2.17963e-20
BORCS5	4.77514e-10	2.06521	0.255	0.051	8.67165e-06
SPATA13	2.69793e-11	2.06306	0.277	0.053	4.89943e-07
PDZRN3	1.87405e-18	2.06129	0.567	0.189	3.40328e-14
DLG1	9.51218e-21	2.05759	0.582	0.167	1.72741e-16
COX7B	8.8295e-13	2.05373	0.312	0.061	1.60344e-08
SRSF11	1.45074e-32	2.05338	0.702	0.159	2.63455e-28
ACAD9	4.82297e-20	2.05327	0.496	0.11	8.75851e-16
SON	6.14282e-29	2.05137	0.716	0.206	1.11554e-24
UBE2W	9.60145e-14	2.04912	0.383	0.091	1.74362e-09
H2AFY	1.30436e-12	2.04073	0.312	0.061	2.36872e-08
CGNL1	5.12286e-22	2.03823	0.596	0.161	9.30311e-18
LEMD3	1.17019e-14	2.03765	0.34	0.064	2.12507e-10
PCNX1	2.8293e-25	2.03557	0.688	0.21	5.13802e-21
SLC6A6	5.95947e-17	2.0315	0.475	0.121	1.08224e-12
MED13L	7.98736e-28	2.0281	0.66	0.161	1.4505e-23
USP6NL	1.37398e-19	2.028	0.461	0.093	2.49515e-15
ZNF706	1.33554e-16	2.01995	0.44	0.102	2.42535e-12
WAPL	3.31586e-22	2.01255	0.511	0.104	6.0216e-18
DMXL1	5.46886e-18	2.01216	0.418	0.081	9.93146e-14
PDIA4	1.76732e-18	2.01173	0.319	0.04	3.20945e-14
MTUS1	9.87442e-23	2.00807	0.61	0.165	1.79319e-18
MAML3	1.68686e-11	2.00351	0.433	0.15	3.06335e-07
NAA16	1.60953e-15	2.00328	0.426	0.102	2.92291e-11
SSU72	1.36685e-10	2.00325	0.319	0.081	2.48221e-06
RNPC3	7.31228e-19	2.00199	0.496	0.119	1.32791e-14
DPP10	1.02928e-09	2.0016	0.348	0.108	1.86917e-05
STRN	1.01062e-13	2.00151	0.418	0.112	1.83528e-09
CCDC186	4.23937e-15	2.00009	0.39	0.085	7.69869e-11
ATAD2B	7.068e-22	2.00006	0.532	0.119	1.28355e-17
CEP170B	3.02815e-15	1.99609	0.362	0.07	5.49913e-11
TP53BP2	4.69223e-12	1.99481	0.312	0.066	8.52108e-08
KLHL2	1.17563e-09	1.99469	0.298	0.076	2.13494e-05
PKP4	9.04517e-16	1.99422	0.333	0.055	1.6426e-11
BTBD3	1.29219e-09	1.99332	0.34	0.11	2.34662e-05
IGF1R	1.53277e-28	1.99149	0.738	0.227	2.78351e-24
SLC30A4	5.71276e-19	1.99031	0.418	0.076	1.03744e-14
VGLL4	4.24336e-19	1.98233	0.525	0.136	7.70595e-15
STARD13	2.86884e-13	1.97858	0.404	0.108	5.20981e-09
CDC27	5.98647e-11	1.97777	0.262	0.049	1.08714e-06
ZSWIM5	1.39454e-10	1.97382	0.312	0.076	2.53248e-06
XPA	1.37811e-15	1.9736	0.383	0.078	2.50264e-11
ZNF593	3.14391e-10	1.97005	0.291	0.068	5.70934e-06
ANKRD12	4.00655e-08	1.96951	0.27	0.074	0.000727589
PDSS2	3.39669e-15	1.96634	0.383	0.081	6.16838e-11
MYO5A	7.1717e-19	1.96511	0.376	0.059	1.30238e-14
ZFAND3	4.86968e-31	1.96229	0.759	0.222	8.84334e-27
COX6C	2.40146e-15	1.95943	0.468	0.129	4.36105e-11
DOCK1	7.74429e-28	1.9562	0.702	0.195	1.40636e-23
TMTC3	8.76475e-14	1.95195	0.369	0.083	1.59168e-09
LRP6	1.17438e-21	1.95125	0.582	0.153	2.13267e-17
B2M	2.07955e-33	1.94996	0.943	0.627	3.77645e-29
KMT2C	3.73792e-31	1.94766	0.816	0.284	6.78806e-27
RPIA	2.1021e-17	1.94218	0.333	0.051	3.81742e-13
ICE2	3.84881e-10	1.94183	0.255	0.051	6.98944e-06
PDGFC	3.28314e-12	1.93585	0.447	0.146	5.96219e-08
DYNC1H1	1.78963e-17	1.93112	0.447	0.1	3.24997e-13
SPEF2	4.5631e-12	1.93034	0.312	0.066	8.28658e-08
EIF2AK3	2.38805e-15	1.92742	0.348	0.064	4.33671e-11
ARHGEF26	7.11532e-14	1.92264	0.326	0.061	1.29214e-09
ARFGEF1	6.37514e-16	1.92039	0.475	0.129	1.15773e-11
SLC25A13	4.69545e-15	1.91878	0.397	0.089	8.52693e-11
MBOAT2	3.79183e-12	1.91855	0.262	0.044	6.88597e-08
WWC2	9.69647e-22	1.91782	0.468	0.087	1.76088e-17
MYO6	2.80201e-15	1.9151	0.411	0.095	5.08846e-11
SLC12A7	9.78856e-13	1.91426	0.362	0.087	1.7776e-08
HSP90B1	8.08597e-17	1.91407	0.525	0.159	1.46841e-12
UNC13B	5.77041e-15	1.91366	0.376	0.078	1.04791e-10
STK39	6.21913e-12	1.91157	0.326	0.074	1.12939e-07
IQCE	9.80449e-13	1.91074	0.333	0.072	1.7805e-08
HIPK2	6.00588e-18	1.91032	0.589	0.201	1.09067e-13
PTK2	2.9287e-25	1.90917	0.716	0.237	5.31852e-21
PLXNB2	9.90752e-35	1.90764	0.901	0.424	1.7992e-30
PALLD	2.37191e-22	1.89604	0.702	0.263	4.30739e-18
TCF20	2.3082e-19	1.89552	0.454	0.091	4.1917e-15
SLC2A13	8.84737e-10	1.8946	0.277	0.064	1.60668e-05
GAS6	8.8169e-26	1.89292	0.603	0.138	1.60115e-21
JAK2	5.33754e-19	1.89122	0.525	0.136	9.69298e-15
BLOC1S6	4.18951e-14	1.88273	0.383	0.089	7.60814e-10
TRIM25	1.82527e-10	1.87926	0.298	0.07	3.31468e-06
CNOT2	6.36243e-24	1.87916	0.574	0.131	1.15542e-19
CCDC50	1.99458e-16	1.87741	0.56	0.197	3.62216e-12
UBE2F	3.64138e-11	1.87572	0.277	0.055	6.61274e-07
YAP1	1.98822e-22	1.8742	0.695	0.244	3.61061e-18
PHF21A	1.44022e-15	1.87246	0.489	0.142	2.61544e-11
SMAD6	6.31849e-11	1.86841	0.305	0.07	1.14744e-06
GALNT2	7.28837e-20	1.86721	0.638	0.216	1.32357e-15
LSM14A	1.69652e-19	1.86702	0.518	0.127	3.08087e-15
INPP5A	4.31567e-19	1.86659	0.631	0.225	7.83726e-15
PHF20	2.30128e-17	1.86567	0.333	0.051	4.17912e-13
PPP2R3A	4.81562e-11	1.86341	0.305	0.07	8.74517e-07
CDC42BPA	1.88766e-25	1.86159	0.667	0.184	3.428e-21
HSPA4L	6.00962e-11	1.85787	0.312	0.074	1.09135e-06
SMCHD1	6.60997e-19	1.85734	0.546	0.15	1.20037e-14
BCR	1.72451e-17	1.85691	0.44	0.097	3.13171e-13
ITM2A	1.36127e-32	1.85626	0.809	0.248	2.47206e-28
NDFIP2	3.30772e-12	1.85417	0.355	0.087	6.00682e-08
BTRC	7.52018e-13	1.85262	0.348	0.078	1.36567e-08
ZNF217	1.89213e-14	1.85055	0.411	0.102	3.4361e-10
NR2C2	1.96364e-20	1.85034	0.532	0.129	3.56598e-16
BTBD9	2.86859e-21	1.84765	0.574	0.15	5.20936e-17
NSMCE2	9.40845e-12	1.84241	0.376	0.104	1.70857e-07
ACVR1	3.26622e-13	1.84202	0.39	0.1	5.93146e-09
GOLGA1	5.96003e-12	1.84005	0.355	0.089	1.08234e-07
PRKAG2	6.33194e-12	1.83999	0.298	0.061	1.14988e-07
SYNE2	3.25082e-27	1.83914	0.745	0.237	5.90349e-23
ATG5	5.02321e-18	1.83475	0.461	0.104	9.12214e-14
N4BP2	5.47064e-11	1.82742	0.298	0.066	9.93469e-07
MSRA	2.54331e-10	1.82294	0.312	0.078	4.61865e-06
UBE2K	5.89319e-16	1.8219	0.418	0.095	1.0702e-11
SUB1	6.00752e-10	1.82153	0.27	0.064	1.09097e-05
LAMTOR2	4.49336e-16	1.82115	0.369	0.072	8.15995e-12
ASPH	1.12995e-27	1.82036	0.908	0.511	2.05198e-23
TSPAN18	1.79625e-17	1.81928	0.546	0.163	3.26199e-13
BRWD3	3.34447e-12	1.81867	0.333	0.076	6.07355e-08
EIF2AK4	5.89562e-15	1.81766	0.369	0.078	1.07064e-10
KIF2A	4.05619e-10	1.81565	0.305	0.076	7.36605e-06
KARS	2.20306e-10	1.8088	0.284	0.064	4.00076e-06
PRKCA	4.80633e-20	1.80668	0.596	0.18	8.72829e-16
REPS1	1.11215e-15	1.8056	0.482	0.136	2.01967e-11
RNGTT	8.75475e-11	1.80266	0.326	0.083	1.58986e-06
KIFAP3	3.25445e-09	1.79629	0.319	0.093	5.91009e-05
FOXK2	1.10805e-11	1.79603	0.369	0.1	2.01222e-07
DCLK1	1.09122e-06	1.79569	0.291	0.104	0.0198166
RORA	3.60146e-21	1.7952	0.766	0.339	6.54026e-17
CEP85L	5.45032e-14	1.79391	0.44	0.123	9.89778e-10
MOB2	3.45836e-14	1.79298	0.411	0.104	6.28039e-10
TNS3	8.30175e-25	1.78887	0.681	0.201	1.5076e-20
COL4A5	3.02157e-11	1.78383	0.312	0.072	5.48717e-07
DNAJC1	3.74947e-19	1.78331	0.482	0.11	6.80904e-15
RSRC1	5.93573e-13	1.78271	0.326	0.068	1.07793e-08
LBH	1.55164e-15	1.78125	0.426	0.102	2.81778e-11
PTPN21	2.12158e-16	1.77722	0.404	0.087	3.85279e-12
ST3GAL6	9.03366e-11	1.77605	0.255	0.049	1.64051e-06
FAM133B	1.76453e-08	1.77407	0.298	0.087	0.000320438
UVSSA	6.35004e-14	1.77316	0.277	0.044	1.15317e-09
TMEM108	3.50767e-07	1.76791	0.262	0.081	0.00636993
SNX7	6.12395e-13	1.76776	0.262	0.042	1.11211e-08
ZFC3H1	2.19328e-24	1.76666	0.681	0.203	3.98299e-20
ANP32A	2.91547e-10	1.7658	0.255	0.051	5.2945e-06
PNN	1.83981e-18	1.7633	0.525	0.14	3.3411e-14
DDX46	1.30839e-17	1.76167	0.567	0.18	2.37603e-13
GTF2F2	3.026e-13	1.76076	0.319	0.064	5.49521e-09
SORBS1	2.31896e-14	1.7607	0.461	0.142	4.21123e-10
PIBF1	2.60118e-09	1.75875	0.284	0.072	4.72375e-05
ANKS6	1.52923e-10	1.75436	0.27	0.055	2.77708e-06
CACHD1	3.77538e-14	1.75301	0.461	0.136	6.85609e-10
UBQLN1	9.52578e-10	1.75126	0.291	0.072	1.72988e-05
SMARCD3	2.42001e-14	1.74981	0.397	0.095	4.39474e-10
FAR1	4.96498e-15	1.74975	0.489	0.146	9.01641e-11
FBXO11	2.76143e-14	1.74763	0.454	0.129	5.01476e-10
TRERF1	8.00487e-11	1.74747	0.369	0.108	1.45369e-06
STRN3	1.62204e-15	1.74638	0.511	0.157	2.94562e-11
MOCOS	7.45448e-09	1.73345	0.27	0.068	0.000135373
ARRDC4	1.81271e-10	1.73325	0.291	0.066	3.29188e-06
PTPN4	4.1433e-08	1.73125	0.291	0.087	0.000752424
CNOT4	2.99093e-09	1.72665	0.369	0.127	5.43152e-05
ULK2	5.50497e-09	1.72528	0.284	0.074	9.99703e-05
KLHDC1	1.35621e-14	1.72165	0.362	0.076	2.46288e-10
PLA2G15	6.17876e-10	1.72056	0.255	0.053	1.12206e-05
NDUFB2	1.15077e-09	1.7159	0.362	0.114	2.08981e-05
SETD3	4.14277e-11	1.70969	0.383	0.114	7.52327e-07
HDAC2	2.87762e-10	1.70823	0.34	0.095	5.22576e-06
AVEN	5.17257e-07	1.70633	0.255	0.076	0.00939339
CCSER2	1.47134e-14	1.70472	0.532	0.184	2.67195e-10
NFIB	1.02064e-26	1.70307	0.851	0.381	1.85348e-22
VPS13D	2.29614e-20	1.70059	0.44	0.083	4.16979e-16
ZNF704	4.87302e-13	1.69841	0.475	0.159	8.84941e-09
KSR1	2.39606e-14	1.69719	0.376	0.085	4.35125e-10
SEPTIN7	3.47424e-17	1.69625	0.546	0.165	6.30923e-13
GAB1	2.14324e-18	1.69536	0.546	0.155	3.89213e-14
CRIM1	1.03357e-23	1.69476	0.73	0.256	1.87697e-19
SSR1	3.49818e-12	1.6941	0.39	0.108	6.35269e-08
LPCAT1	3.06675e-13	1.69353	0.411	0.112	5.56921e-09
RSRC2	3.05932e-15	1.68844	0.546	0.189	5.55572e-11
SUCLG2	1.99696e-12	1.68585	0.397	0.11	3.62648e-08
EDF1	8.31468e-12	1.68577	0.411	0.125	1.50995e-07
PARD3B	1.53019e-22	1.68546	0.681	0.22	2.77883e-18
CDK17	4.88533e-14	1.68401	0.34	0.068	8.87176e-10
ABCC5	1.07585e-11	1.68348	0.326	0.076	1.95374e-07
HIF1A	5.50513e-09	1.67748	0.298	0.083	9.99732e-05
GLS	4.52156e-17	1.67718	0.582	0.193	8.21116e-13
DNAJC14	3.00553e-12	1.67399	0.262	0.047	5.45804e-08
ITCH	3.47294e-17	1.67397	0.603	0.212	6.30685e-13
PTPRG	5.24945e-15	1.67387	0.617	0.252	9.533e-11
ST7	9.62835e-17	1.67379	0.482	0.127	1.74851e-12
WWC3	9.39664e-13	1.67378	0.426	0.125	1.70643e-08
UBE2D1	1.13115e-11	1.67279	0.277	0.055	2.05416e-07
SLMAP	3.28671e-16	1.67232	0.539	0.169	5.96866e-12
GBF1	1.81408e-11	1.67189	0.362	0.097	3.29438e-07
SLC16A2	4.74744e-08	1.66301	0.284	0.083	0.000862135
TMED10	3.69817e-16	1.66072	0.447	0.11	6.71588e-12
EPB41L5	7.25203e-14	1.65701	0.319	0.059	1.31697e-09
SVIL	3.69244e-14	1.65608	0.539	0.193	6.70547e-10
WDR70	1.29237e-09	1.65053	0.319	0.089	2.34694e-05
SKAP2	1.19191e-15	1.64848	0.482	0.136	2.1645e-11
BRD1	1.57931e-17	1.6467	0.617	0.225	2.86803e-13
ARID4A	3.40529e-14	1.64554	0.355	0.076	6.18401e-10
NEK1	1.66056e-11	1.64253	0.326	0.078	3.01558e-07
TBCK	2.05074e-09	1.64177	0.404	0.15	3.72414e-05
ATRX	2.94998e-17	1.64078	0.638	0.239	5.35716e-13
INTS6L	1.22019e-07	1.6404	0.262	0.074	0.00221586
AFAP1	1.87742e-10	1.63947	0.355	0.104	3.4094e-06
TUBB4B	2.37008e-08	1.6392	0.326	0.106	0.000430407
RSBN1L	4.82898e-13	1.63852	0.418	0.119	8.76943e-09
FARP2	3.76676e-08	1.63459	0.262	0.07	0.000684043
BIRC6	3.69059e-21	1.63226	0.631	0.193	6.70212e-17
CEP162	5.14059e-12	1.63028	0.291	0.059	9.33532e-08
KMT2E	9.62927e-24	1.62869	0.745	0.275	1.74868e-19
AGRN	5.95609e-12	1.62825	0.291	0.059	1.08163e-07
MDH1	1.8265e-10	1.62711	0.305	0.074	3.31692e-06
HERC2	1.66001e-16	1.62381	0.489	0.133	3.01457e-12
FCHSD2	3.38997e-14	1.62264	0.475	0.144	6.15619e-10
ANKIB1	9.41339e-09	1.6217	0.333	0.106	0.000170947
MTF2	1.81524e-06	1.61849	0.27	0.091	0.0329648
UBE2D2	2.20565e-13	1.61791	0.411	0.112	4.00546e-09
TSPAN13	4.20571e-12	1.617	0.362	0.095	7.63757e-08
GCC2	9.08566e-13	1.61582	0.397	0.108	1.64996e-08
SLC39A10	9.99749e-08	1.611	0.262	0.074	0.00181554
EVI5	3.56625e-19	1.59971	0.603	0.189	6.4763e-15
AIG1	1.35283e-11	1.59921	0.355	0.093	2.45673e-07
PECAM1	1.07337e-19	1.5985	0.496	0.119	1.94923e-15
STAG2	1.49511e-16	1.59834	0.56	0.182	2.71512e-12
RBBP6	2.04606e-16	1.59776	0.518	0.153	3.71565e-12
FARP1	3.25927e-11	1.5977	0.433	0.146	5.91883e-07
FAM13A	2.37342e-12	1.59728	0.468	0.159	4.31013e-08
ILF2	4.32422e-12	1.59553	0.333	0.078	7.85279e-08
XRCC5	1.98863e-09	1.59318	0.305	0.083	3.61136e-05
RELCH	6.49236e-09	1.59278	0.305	0.087	0.000117901
TANC1	4.44198e-14	1.59031	0.447	0.129	8.06664e-10
MYLK	4.19855e-18	1.58806	0.709	0.299	7.62456e-14
ATXN1	3.05577e-09	1.58748	0.376	0.129	5.54928e-05
CLASP1	4.24814e-11	1.58689	0.426	0.142	7.71462e-07
UBAC2	2.63127e-10	1.58212	0.305	0.076	4.77838e-06
ATP5MC3	5.85546e-09	1.58007	0.291	0.078	0.000106335
DDA1	3.28307e-07	1.57928	0.262	0.078	0.00596206
PDGFA	8.90609e-09	1.57835	0.291	0.081	0.000161735
CC2D2A	2.92682e-14	1.57711	0.447	0.125	5.31511e-10
RANBP17	7.10719e-07	1.57697	0.277	0.091	0.0129067
COP1	4.14701e-11	1.57661	0.291	0.066	7.53097e-07
PARP4	5.92164e-16	1.5695	0.489	0.138	1.07537e-11
NTRK2	1.09853e-06	1.56836	0.376	0.165	0.0199493
THRAP3	4.81381e-18	1.56433	0.603	0.199	8.74188e-14
CWC27	5.66506e-09	1.56273	0.34	0.108	0.000102878
TNRC6C	1.28839e-10	1.55903	0.383	0.119	2.33972e-06
ADD3	1.00225e-21	1.55755	0.73	0.282	1.82009e-17
ULK4	1.69918e-07	1.55709	0.305	0.102	0.00308571
USP22	5.12143e-11	1.55261	0.461	0.169	9.30052e-07
EIF3E	4.22337e-09	1.55099	0.277	0.07	7.66963e-05
ATP5MC1	6.59715e-11	1.55092	0.298	0.07	1.19804e-06
KANSL1L	4.41934e-15	1.54912	0.482	0.142	8.02553e-11
FAF1	1.31862e-16	1.54909	0.468	0.121	2.39462e-12
KAT2B	5.34988e-07	1.54858	0.305	0.108	0.00971538
ERO1B	5.60656e-09	1.54617	0.262	0.064	0.000101815
NCK1	1.89727e-10	1.54518	0.333	0.093	3.44544e-06
PPP2R5A	8.80022e-11	1.54318	0.362	0.104	1.59812e-06
DDX3X	1.51241e-23	1.53916	0.752	0.273	2.74654e-19
ATF7IP	2.8921e-15	1.53816	0.56	0.195	5.25206e-11
RHBDD1	1.48333e-10	1.53444	0.27	0.059	2.69373e-06
AP2A2	5.06938e-11	1.53286	0.376	0.11	9.20599e-07
USP24	1.97074e-15	1.53225	0.475	0.133	3.57887e-11
VAPB	5.92531e-15	1.53179	0.489	0.148	1.07604e-10
TMEM258	7.81863e-08	1.52697	0.255	0.07	0.00141986
CDH2	5.80725e-20	1.52676	0.752	0.309	1.0546e-15
ARMH3	2.80181e-08	1.52255	0.291	0.085	0.000508809
MGA	1.92824e-09	1.5211	0.39	0.136	3.50169e-05
MAP3K4	3.27778e-09	1.51944	0.319	0.093	5.95245e-05
CHCHD10	4.53149e-09	1.51895	0.362	0.121	8.22919e-05
LGR4	7.06268e-12	1.51871	0.426	0.133	1.28258e-07
ST3GAL3	1.8827e-11	1.51725	0.355	0.1	3.41898e-07
AP3B1	4.07373e-13	1.51707	0.411	0.114	7.3979e-09
USP7	2.11768e-10	1.51659	0.369	0.112	3.8457e-06
PFDN1	6.23226e-17	1.51553	0.376	0.072	1.13178e-12
MAPK6	1.32301e-08	1.51448	0.291	0.083	0.000240259
PSIP1	8.29519e-07	1.51434	0.255	0.078	0.0150641
BAG3	2.47792e-11	1.51284	0.404	0.125	4.4999e-07
PSPC1	9.26132e-20	1.51174	0.61	0.189	1.68186e-15
TRIO	1.75027e-19	1.51097	0.695	0.263	3.17848e-15
ERLIN2	1.26157e-10	1.50601	0.326	0.085	2.29102e-06
ATL2	5.31279e-09	1.50519	0.348	0.112	9.64803e-05
PLEKHA5	1.46643e-09	1.49972	0.56	0.297	2.66304e-05
ATP2A2	2.08062e-10	1.49939	0.539	0.248	3.77841e-06
ZEB1	1.29879e-09	1.49834	0.426	0.159	2.3586e-05
TMEM184C	1.59437e-07	1.49834	0.255	0.072	0.00289537
CASTOR2	6.13486e-08	1.49691	0.284	0.085	0.00111409
FBXL2	1.33077e-11	1.49483	0.277	0.057	2.41667e-07
ARHGAP12	8.18298e-19	1.49462	0.617	0.203	1.48603e-14
OXR1	1.8396e-15	1.49242	0.638	0.256	3.34072e-11
TTC7A	5.70708e-08	1.49185	0.255	0.068	0.00103641
NKTR	8.65474e-14	1.48968	0.532	0.189	1.5717e-09
PPP2R5E	1.10579e-10	1.48901	0.376	0.114	2.00811e-06
MEIS2	3.3687e-12	1.48789	0.709	0.379	6.11755e-08
CHKA	3.65638e-08	1.48627	0.27	0.076	0.000663998
ZFHX3	2.2295e-11	1.48618	0.411	0.129	4.04876e-07
MIA2	2.52993e-09	1.48523	0.312	0.089	4.59436e-05
DIDO1	5.92235e-22	1.48458	0.582	0.153	1.0755e-17
PCNX2	1.54194e-08	1.48347	0.305	0.091	0.000280017
PMEPA1	1.06966e-10	1.48029	0.291	0.068	1.9425e-06
JMJD1C	2.15566e-17	1.47923	0.645	0.242	3.91467e-13
DEK	6.31293e-11	1.47553	0.433	0.148	1.14643e-06
DNAJA1	1.79426e-17	1.47484	0.667	0.258	3.25838e-13
PGAP1	2.25593e-09	1.47199	0.262	0.064	4.09676e-05
NPNT	2.34699e-11	1.47062	0.348	0.093	4.26214e-07
VPS13B	6.09478e-23	1.46971	0.766	0.292	1.10681e-18
SNRPE	3.38443e-09	1.46728	0.27	0.068	6.14612e-05
RALBP1	1.86664e-09	1.46711	0.319	0.093	3.38981e-05
TLK1	3.21912e-11	1.46245	0.489	0.186	5.84593e-07
ABLIM1	6.26105e-17	1.45942	0.709	0.32	1.13701e-12
MARK3	1.75159e-16	1.45811	0.56	0.182	3.18089e-12
GIGYF2	1.58924e-13	1.45666	0.404	0.108	2.88605e-09
FOCAD	3.32333e-09	1.45589	0.298	0.083	6.03517e-05
RNF13	1.74355e-14	1.45519	0.539	0.186	3.16629e-10
DHX29	1.12654e-06	1.45447	0.284	0.097	0.0204579
ZFHX4	9.36784e-07	1.45438	0.34	0.138	0.017012
SIPA1L1	2.46936e-10	1.45396	0.362	0.108	4.48436e-06
ANKRD26	6.29025e-07	1.44972	0.291	0.1	0.0114231
DENND4C	7.74703e-13	1.44565	0.468	0.153	1.40686e-08
2024-03-01	8.16632e-11	1.44523	0.27	0.061	1.483e-06
COG5	1.70724e-14	1.44124	0.433	0.119	3.10035e-10
RSRP1	1.5034e-24	1.44116	0.794	0.307	2.73018e-20
MTMR12	2.39313e-13	1.4382	0.447	0.133	4.34593e-09
SPATS2L	7.78064e-10	1.43776	0.39	0.131	1.41296e-05
AHCYL2	2.71921e-09	1.43486	0.333	0.102	4.93809e-05
AGTRAP	8.64317e-11	1.43246	0.326	0.089	1.5696e-06
CD81	1.72078e-23	1.42855	0.823	0.347	3.12493e-19
NUCB2	8.67865e-14	1.42699	0.454	0.136	1.57604e-09
CDC5L	5.72413e-13	1.42642	0.475	0.157	1.0395e-08
CYBA	1.13024e-08	1.42542	0.355	0.121	0.000205252
GM2A	1.20292e-08	1.42207	0.262	0.068	0.00021845
SPRED2	5.42016e-09	1.42107	0.319	0.095	9.84301e-05
WDR20	2.50605e-10	1.41959	0.426	0.15	4.55099e-06
WWP1	2.69192e-11	1.41927	0.383	0.114	4.88852e-07
RGL1	4.43069e-10	1.41309	0.546	0.25	8.04614e-06
AKAP9	2.15637e-19	1.4116	0.688	0.256	3.91596e-15
ZC3H6	1.31855e-15	1.41059	0.404	0.095	2.39448e-11
NET1	7.42973e-12	1.40701	0.284	0.059	1.34924e-07
ZNF516	4.65322e-08	1.40465	0.34	0.119	0.000845024
MPDZ	3.52068e-07	1.40464	0.312	0.11	0.00639356
KIAA0319L	1.87061e-09	1.40444	0.39	0.136	3.39703e-05
PCBP4	3.08321e-12	1.40319	0.376	0.104	5.59911e-08
EIF3H	4.41787e-13	1.40312	0.447	0.138	8.02286e-09
PAXBP1	1.46456e-11	1.40177	0.411	0.129	2.65963e-07
STARD3NL	1.33395e-08	1.39987	0.326	0.104	0.000242244
ATRNL1	1.519e-12	1.3997	0.631	0.288	2.7585e-08
TCERG1	1.37811e-11	1.3994	0.461	0.161	2.50264e-07
SSBP2	4.32104e-09	1.39709	0.397	0.146	7.84702e-05
SLC25A36	4.82436e-15	1.39694	0.511	0.161	8.76104e-11
NBAS	8.2151e-13	1.39544	0.447	0.14	1.49186e-08
ZCCHC8	1.04053e-08	1.39501	0.255	0.064	0.00018896
OXCT1	2.17401e-16	1.39433	0.397	0.091	3.94801e-12
VPS8	6.53629e-10	1.39406	0.284	0.074	1.18699e-05
EXT1	2.9717e-11	1.39279	0.525	0.214	5.39661e-07
BRWD1	5.0588e-09	1.39263	0.348	0.112	9.18678e-05
SLC4A7	4.29504e-10	1.39202	0.333	0.095	7.79979e-06
ADGRL2	9.3261e-17	1.39154	0.688	0.286	1.69362e-12
SFPQ	1.5005e-16	1.39144	0.511	0.15	2.7249e-12
MIA3	1.69535e-07	1.38509	0.376	0.15	0.00307875
RBM3	5.5608e-13	1.38059	0.482	0.161	1.00984e-08
RBPJ	1.89702e-07	1.37638	0.333	0.121	0.00344499
MPLKIP	7.83894e-08	1.37576	0.262	0.074	0.00142355
CNOT1	1.46267e-06	1.37485	0.298	0.108	0.0265621
PATJ	1.77643e-15	1.36862	0.511	0.159	3.22599e-11
SPAG16	8.35384e-07	1.36674	0.298	0.106	0.0151706
UBR3	1.16332e-11	1.36481	0.468	0.165	2.11259e-07
APPL2	1.19433e-13	1.36187	0.433	0.127	2.1689e-09
SMAD3	2.16853e-21	1.36123	0.716	0.261	3.93805e-17
YES1	6.31596e-11	1.35975	0.433	0.148	1.14698e-06
EXOC1	5.59133e-09	1.35846	0.34	0.108	0.000101538
CNPY3	1.80778e-08	1.35804	0.426	0.174	0.000328294
SPTLC1	1.47812e-11	1.3537	0.362	0.102	2.68427e-07
CNOT6	1.88482e-06	1.35222	0.27	0.091	0.0342284
RAB3GAP2	2.19071e-09	1.35018	0.319	0.093	3.97833e-05
RIC8B	8.63945e-07	1.34913	0.27	0.089	0.0156892
SNX9	2.86027e-12	1.34594	0.468	0.159	5.19424e-08
RARB	7.8217e-09	1.34511	0.362	0.125	0.000142042
ZMYND8	1.81574e-10	1.34459	0.475	0.184	3.29739e-06
ARID4B	4.15649e-11	1.34418	0.468	0.172	7.54819e-07
CCND1	3.17461e-11	1.34331	0.496	0.193	5.76509e-07
EFNB1	3.96019e-10	1.34199	0.426	0.153	7.19171e-06
PIGK	2.03183e-07	1.34177	0.326	0.117	0.0036898
SLC10A7	9.3865e-07	1.34157	0.262	0.085	0.0170459
LCOR	9.27616e-08	1.33974	0.355	0.131	0.00168455
SF3B1	1.4305e-16	1.33504	0.518	0.159	2.59778e-12
NFYC	6.31156e-09	1.33158	0.312	0.093	0.000114618
LAMA5	2.72552e-13	1.3221	0.454	0.146	4.94955e-09
TUT4	3.06818e-13	1.32	0.567	0.222	5.57181e-09
DPYD	1.62135e-09	1.31992	0.496	0.216	2.94438e-05
CHD4	1.13942e-11	1.31792	0.426	0.14	2.06918e-07
CBLB	1.86341e-08	1.3174	0.426	0.174	0.000338395
NAXD	3.00527e-07	1.30681	0.277	0.087	0.00545757
FXR1	4.77418e-11	1.30619	0.411	0.133	8.66991e-07
CXXC5	9.97388e-08	1.30606	0.319	0.11	0.00181126
APBB2	6.83312e-12	1.30596	0.433	0.14	1.24089e-07
IDE	3.13089e-08	1.30523	0.305	0.095	0.00056857
ARHGAP5	1.96241e-09	1.3032	0.411	0.15	3.56374e-05
NSD1	5.71788e-10	1.30293	0.376	0.123	1.03837e-05
IQSEC1	5.01764e-09	1.30141	0.539	0.263	9.11204e-05
BRF1	5.38443e-12	1.29852	0.454	0.153	9.77813e-08
RBFOX2	9.1924e-10	1.29036	0.482	0.199	1.66934e-05
CHST15	4.88424e-09	1.29005	0.291	0.083	8.86978e-05
ARHGAP17	4.44493e-11	1.28961	0.496	0.193	8.07199e-07
GPATCH2	2.56919e-08	1.28327	0.34	0.117	0.000466565
STAU2	2.24238e-18	1.28052	0.652	0.237	4.07216e-14
PRMT1	9.28503e-08	1.28012	0.355	0.131	0.00168616
CHD1	2.89629e-07	1.27314	0.326	0.119	0.00525967
TOP1	2.0765e-09	1.27047	0.362	0.119	3.77093e-05
MAPK3	1.11429e-12	1.26761	0.44	0.138	2.02355e-08
SRSF3	6.65492e-10	1.26676	0.468	0.186	1.20853e-05
PIK3C3	9.00491e-09	1.26154	0.333	0.108	0.000163529
HNRNPR	3.08097e-10	1.26143	0.34	0.104	5.59503e-06
VAV2	1.53659e-10	1.25905	0.34	0.097	2.79044e-06
FAM204A	1.25294e-07	1.25809	0.262	0.078	0.00227533
TCF4	7.91756e-11	1.25729	0.525	0.218	1.43783e-06
TST	9.47289e-07	1.25519	0.305	0.112	0.0172028
NR2C1	1.50847e-11	1.25238	0.284	0.064	2.73939e-07
TSC22D4	7.75472e-13	1.24852	0.496	0.174	1.40826e-08
TOP2B	6.98544e-13	1.24412	0.447	0.142	1.26856e-08
UBL3	1.36405e-11	1.24228	0.447	0.155	2.47712e-07
PSME4	8.2277e-10	1.24101	0.362	0.117	1.49415e-05
PIAS1	6.58838e-13	1.2391	0.426	0.129	1.19645e-08
CCNY	6.68527e-09	1.23892	0.39	0.144	0.000121404
CREB3L2	2.57736e-10	1.23595	0.369	0.117	4.68049e-06
RAI14	6.32823e-08	1.23433	0.319	0.11	0.00114921
MPP5	2.71036e-07	1.23402	0.277	0.089	0.00492202
PDS5B	1.6769e-07	1.23396	0.34	0.125	0.00304525
RASSF8	1.2942e-09	1.23298	0.461	0.184	2.35027e-05
PHF20L1	1.19174e-15	1.23095	0.546	0.184	2.1642e-11
RNF180	4.75518e-07	1.23004	0.284	0.095	0.0086354
ZNF532	5.97073e-12	1.22876	0.433	0.14	1.08428e-07
STAG1	2.69103e-10	1.22805	0.511	0.214	4.88692e-06
CD164	2.19851e-13	1.22721	0.482	0.165	3.99249e-09
COL14A1	2.64214e-14	1.22461	0.702	0.331	4.79812e-10
FUBP1	6.44268e-16	1.22292	0.752	0.369	1.16999e-11
RAMP2	2.21473e-09	1.22268	0.326	0.102	4.02195e-05
BICD2	3.10419e-09	1.21904	0.333	0.106	5.63721e-05
USP25	2.74037e-10	1.21694	0.461	0.178	4.97652e-06
EEA1	4.88203e-09	1.21546	0.376	0.133	8.86577e-05
SPICE1	1.4834e-09	1.21297	0.262	0.064	2.69385e-05
PLOD1	4.71555e-09	1.20933	0.39	0.142	8.56343e-05
NTAN1	3.48768e-07	1.20933	0.277	0.091	0.00633363
RIPOR3	8.25702e-08	1.20608	0.262	0.081	0.00149947
MAEA	8.96024e-07	1.20169	0.298	0.106	0.0162718
SLC12A2	6.85414e-11	1.19626	0.418	0.142	1.24471e-06
ZBTB20	3.40376e-15	1.19339	0.681	0.297	6.18122e-11
MICAL3	4.93999e-08	1.19309	0.418	0.174	0.000897103
TIA1	2.59997e-09	1.19264	0.39	0.14	4.72154e-05
SMG6	4.08322e-07	1.1897	0.284	0.095	0.00741513
CPSF6	2.84255e-12	1.18915	0.433	0.14	5.16207e-08
PLOD2	4.48165e-07	1.18359	0.34	0.131	0.00813868
PRR14L	1.30289e-07	1.18031	0.312	0.108	0.00236605
MAPKAP1	2.85124e-08	1.17846	0.362	0.131	0.000517785
IQGAP1	6.39151e-07	1.17666	0.326	0.123	0.011607
PCGF3	5.77008e-10	1.17209	0.511	0.218	1.04785e-05
NCOA1	5.47564e-09	1.1683	0.333	0.108	9.94377e-05
DST	2.40607e-15	1.16797	0.759	0.379	4.36943e-11
CUL1	8.98833e-10	1.16388	0.426	0.159	1.63228e-05
LRPAP1	6.42754e-16	1.16287	0.695	0.301	1.16724e-11
SCFD1	1.82951e-07	1.16257	0.326	0.119	0.0033224
DCXR	1.73154e-08	1.16198	0.362	0.129	0.000314447
HNRNPDL	2.49274e-13	1.15966	0.617	0.263	4.52682e-09
JTB	1.04922e-06	1.15945	0.348	0.142	0.0190539
NEO1	2.83833e-10	1.15554	0.461	0.178	5.1544e-06
CREBBP	2.33425e-10	1.15168	0.468	0.182	4.239e-06
FAM32A	1.86968e-09	1.15098	0.369	0.125	3.39534e-05
NCOA6	4.80129e-10	1.14954	0.326	0.095	8.71915e-06
CLK4	7.08158e-11	1.14901	0.383	0.121	1.28601e-06
BICC1	9.94202e-12	1.14339	0.582	0.254	1.80547e-07
EXOC6	2.43255e-06	1.14339	0.27	0.093	0.0441751
ZBTB46	5.0143e-10	1.14322	0.312	0.089	9.10597e-06
LPP	2.10163e-14	1.1335	0.567	0.21	3.81655e-10
NAA35	9.03237e-10	1.13313	0.277	0.068	1.64028e-05
TMEM131	3.4998e-10	1.13298	0.383	0.125	6.35564e-06
CRY2	9.05131e-09	1.13051	0.397	0.15	0.000164372
TTC21B	3.65952e-10	1.12877	0.326	0.097	6.64568e-06
CSNK1A1	3.13737e-09	1.12875	0.44	0.176	5.69747e-05
PLEKHM3	2.16062e-07	1.1282	0.27	0.083	0.00392368
SUMO2	1.50156e-10	1.12692	0.454	0.169	2.72684e-06
WNK1	2.35824e-15	1.12191	0.61	0.235	4.28256e-11
STK38L	1.7762e-07	1.11485	0.355	0.136	0.00322558
LRRFIP2	8.7631e-07	1.11275	0.333	0.129	0.0159138
CSTF3	1.16447e-08	1.11247	0.376	0.138	0.000211468
MAP2K4	1.84349e-10	1.10986	0.411	0.144	3.34778e-06
SLC44A1	1.34433e-14	1.10763	0.638	0.267	2.4413e-10
PRRC2C	3.76415e-10	1.10693	0.504	0.212	6.8357e-06
ITPR1	2.55424e-09	1.10333	0.411	0.155	4.6385e-05
MYH10	6.30106e-11	1.10044	0.56	0.246	1.14427e-06
MEIS1	1.37321e-11	1.09941	0.752	0.419	2.49375e-07
UBN2	3.10032e-08	1.0965	0.369	0.136	0.000563017
FAM20C	2.52118e-07	1.09608	0.376	0.153	0.00457847
RBM33	1.039e-17	1.09437	0.73	0.314	1.88682e-13
RBM25	3.55812e-14	1.09037	0.624	0.258	6.46154e-10
PCCB	1.93379e-10	1.08967	0.397	0.136	3.51177e-06
MAPK8IP3	2.35855e-09	1.08885	0.411	0.155	4.28312e-05
DICER1	5.75375e-08	1.079	0.326	0.114	0.00104488
NSMF	1.2094e-10	1.07863	0.525	0.222	2.19627e-06
SKI	3.76283e-11	1.07786	0.61	0.286	6.8333e-07
CSNK1D	1.67072e-11	1.07735	0.489	0.189	3.03403e-07
DSP	5.67888e-07	1.07242	0.312	0.117	0.0103128
SMURF2	2.46829e-09	1.07194	0.404	0.15	4.48241e-05
ZNF451	2.17805e-06	1.07051	0.284	0.104	0.0395535
IRF2	4.89698e-10	1.0671	0.376	0.127	8.89292e-06
SERBP1	2.81223e-08	1.06152	0.447	0.193	0.000510701
CDK13	1.29901e-11	1.06028	0.447	0.155	2.35901e-07
ANKRD44	4.92969e-11	1.05998	0.39	0.129	8.95232e-07
ZC3H7A	1.28935e-08	1.05922	0.326	0.108	0.000234147
CPT1A	9.09884e-12	1.05793	0.348	0.1	1.65235e-07
HSPA4	1.8573e-06	1.05444	0.27	0.097	0.0337286
HSPA5	1.30098e-09	1.05329	0.404	0.148	2.36258e-05
VWA8	1.69565e-07	1.04612	0.319	0.117	0.0030793
EIF5	1.33576e-15	1.03996	0.638	0.256	2.42573e-11
IVNS1ABP	9.2728e-08	1.03726	0.397	0.163	0.00168394
AKT3	1.40467e-09	1.037	0.525	0.235	2.55089e-05
BAZ1B	5.3979e-09	1.03559	0.468	0.199	9.80259e-05
ARMC9	2.01432e-06	1.03393	0.262	0.093	0.0365801
PTCH1	6.19795e-12	1.03326	0.376	0.114	1.12555e-07
ITGA2	2.53704e-09	1.03131	0.326	0.102	4.60726e-05
REPS2	3.58723e-07	1.03053	0.426	0.193	0.00651442
U2SURP	9.53779e-13	1.02199	0.603	0.258	1.73206e-08
LYST	6.60331e-07	1.01553	0.284	0.097	0.0119916
ANKRD11	4.51837e-12	1.01465	0.603	0.269	8.20536e-08
PHF6	1.88736e-08	1.01462	0.284	0.089	0.000342745
HNRNPU	3.53464e-15	1.01349	0.674	0.292	6.4189e-11
PPA2	2.21186e-07	1.00914	0.319	0.117	0.00401673
PBRM1	1.2582e-09	1.00779	0.383	0.136	2.28488e-05

## Sheet: Sheet1
GO term analysis of the genes specifically expressed in chicken capsular cells
Description	LogP	Log(q-value)
response to growth factor	-12	-9.6
kidney epithelium development	-10	-8.1
Adherens junction	-9.9	-7.7
renal system development	-8.7	-6.7
cellular response to transforming growth factor beta stimulus	-8.7	-6.7
gland development	-8.1	-6.1
cell-cell signaling by wnt	-7.7	-5.8
Signaling by NOTCH	-7.1	-5.2
steroid hormone mediated signaling pathway	-5.8	-4.1
Aldosterone synthesis and secretion	-5.8	-4.1
